# Supplementary material for: Transcriptional profiling at whole population and single cell levels reveals somatosensory neuron molecular diversity
Source: eLife. 2014 Dec 19;3:e04660. doi: 10.7554/eLife.04660 (PMC4383053; doi:10.7554/eLife.04660)
Supplement: Supplementary file 1. — Comparison of SNS-Cre/TdT vs Parv-Cre/TdT neuron expression profiles. Differential expression analysis of microarray data from SNS-Cre/TdTomato+ neurons (n = 4) vs Parv-Cre/TdTomato+ neurons (n = 4). Transcripts are ranked by fold-change, with the following information given: Affymetrix ID, genebank accession number, gene symbol, description, average RMA normalized levels, standard deviation, fold-change, p-value and FDR. DOI: http://dx.doi.org/10.7554/eLife.04660.031 [file elife04660s001.xlsx]

## Sheet: Sheet1
Pairwise Comparison of SNS-Cre/TdTomato vs Parv-Cre/TdTomato Transcriptional Profiles
All transcripts (CoV<0.65 within groups)				Average Expression		Standard Deviation		Fold-change
Affymetrix Probe ID	Genbank Accession Number	Gene Symbol	Description	Nav1.8Tg-TdT	Parv-TdT	Nav1.8Tg-TdT	Parv-TdT	Nav1.8Tg-TdT/Parv-TdT	p-value	FDR
10498965	NM_008731	Npy2r	neuropeptide Y receptor Y2	953.775	56.6525	149.218	11.6307	16.8355	0.00117843	0.00581833
10421517	NM_133720	Cysltr2	cysteinyl leukotriene receptor 2	792.908	49.0881	259.595	17.4956	16.1527	0.0103567	0.021469
10464471	NM_010253	Gal	galanin	2910.08	207.221	377.491	79.0081	14.0434	0.000501021	0.00356823
10366391	NM_001025581	Kcnc2	potassium voltage gated channel	1002.16	79.1438	189.07	28.0985	12.6626	0.00196495	0.00780189
10563706	NM_001177566	Mrgpra9	MAS-related GPR	3119.9	248.578	262.042	145.885	12.551	1.22456e-05	0.000528077
10460010	NM_008082	Galr1	galanin receptor 1	915.043	74.3381	88.0405	15.1928	12.3092	0.000228544	0.00229478
10353221	NM_177781	Trpa1	transient receptor potential cation channel	1892.89	156.554	475.958	73.8633	12.091	0.00469204	0.0131095
10510260	NM_008726	Nppb	natriuretic peptide type B	927.85	79.3062	126.874	25.3838	11.6996	0.000643492	0.00414794
10514491	NM_001100182	Cyp2j12-ps	cytochrome P450	955.819	87.1427	161.735	18.2214	10.9684	0.00157092	0.0068387
10357833	NM_001167949	Atp2b4	ATPase	2119.26	194.656	303.423	65.2819	10.8872	0.000725261	0.00440322
10378349	NM_001001445	Trpv1	transient receptor potential cation channel	3856.61	356.454	237.208	130.59	10.8194	3.22661e-06	0.000275341
10511429	NM_007592	Car8	carbonic anhydrase 8	967.497	89.9282	201.975	9.45724	10.7586	0.00316339	0.0104207
10577980	NM_021369	Chrna6	cholinergic receptor	2328.75	217.326	423.147	72.3552	10.7155	0.00175164	0.00730927
10571170	NM_173212	Chrnb3	cholinergic receptor	938.709	90.5623	86.512	29.8415	10.3653	8.66993e-05	0.00135382
10388042	NM_134022	6330403K07Rik	RIKEN cDNA 6330403K07 gene	2607.14	251.709	359.296	120.377	10.3577	0.000395666	0.00308915
10472372	NM_001099298	Scn2a1	sodium channel	1728.91	169.718	127.544	70.7644	10.187	7.46682e-06	0.000418821
10531887	NM_029415	Slc10a6	solute carrier family 10 (sodium	1359.92	137.776	345.419	38.8907	9.87055	0.0054412	0.0142584
10458183	NM_010280	Gfra3	glial cell line derived neurotrophic factor family receptor alpha 3	4366.74	445.45	696.704	94.0736	9.803	0.00130843	0.00614424
10427471	NM_011019	Osmr	oncostatin M receptor	2662.93	272.495	519.525	83.5399	9.7724	0.00229799	0.00862803
10412126	NM_139299	Il31ra	interleukin 31 receptor A	1585.55	162.752	405.139	36.0857	9.74211	0.00569485	0.014661
10538459	NM_007472	Aqp1	aquaporin 1	4220.5	451.803	852.822	156.227	9.34147	0.00248223	0.00905923
10376245	NM_001113325	Gria1	glutamate receptor	695.712	75.3738	160.419	17.7694	9.23015	0.00419857	0.0122768
10478285	NR_033569	9430021M05Rik	RIKEN cDNA 9430021M05 gene	849.478	92.8276	142.903	34.14	9.15113	0.00120426	0.0058867
10438730	NM_009215	Sst	somatostatin	3022.98	331.4	1380	100.717	9.12184	0.0295427	0.0429889
10605986	NM_007515	Slc7a3	solute carrier family 7 (cationic amino acid transporter	710.61	78.6437	255.693	22.781	9.03582	0.01547	0.0280096
10483828	NM_001081033	Pde11a	phosphodiesterase 11A	1803.9	200.471	234.31	38.1775	8.99833	0.000670136	0.0042156
10563740	NM_207540	Mrgprx1	MAS-related GPR	1689.33	188.568	161.628	68.815	8.95873	6.2673e-05	0.00114616
10417526	NM_007870	Dnase1l3	deoxyribonuclease 1-like 3	1023.15	114.531	122.477	19.7249	8.93339	0.000523807	0.00368651
10362968	NM_024285	Bves	blood vessel epicardial substance	2712.2	307.27	592.988	127.475	8.82677	0.00302022	0.0101614
10423230	NM_009869	Cdh9	cadherin 9	630.364	72.1732	131.022	26.6494	8.73404	0.00265803	0.00942096
10349174	NM_011459	Serpinb8	serine (or cysteine) peptidase inhibitor	866.914	99.4896	184.391	14.735	8.71361	0.00349753	0.0110383
10563858	NM_008074	Gabrg3	gamma-aminobutyric acid (GABA) A receptor	722.067	83.2344	257.706	8.74457	8.67511	0.0156929	0.0282783
10584855	NM_001014761	Scn2b	sodium channel	1072.86	124.694	96.386	39.9852	8.60396	5.36385e-05	0.00105111
10348378	NM_134252	Trpm8	transient receptor potential cation channel	1313.21	153.595	177.967	97.3551	8.54981	0.000140472	0.00179161
10597656	NM_021544	Scn5a	sodium channel	1044.75	122.51	91.7693	16.886	8.52783	0.000186206	0.00206582
10597309	NM_016853	Stac	src homology three (SH3) and cysteine rich domain	1457.52	174.642	89.9343	41.7743	8.34577	7.9482e-06	0.000431262
10587639	NM_011851	Nt5e	5' nucleotidase	2129.36	255.509	297.681	80.8998	8.33381	0.000602587	0.00399525
10440393	NM_023380	Samsn1	SAM domain	910.928	109.907	132.527	32.9381	8.2882	0.000754673	0.00450646
10472923	NM_001177602	Ak4	adenylate kinase 4	640.353	77.7617	246.734	10.7595	8.23481	0.019658	0.0327529
10593756	NM_145129	Chrna3	cholinergic receptor	2707.61	332.061	421.752	83.0447	8.15394	0.0011217	0.00565519
10350438	NM_001081027	Kcnt2	potassium channel	434.707	54.4248	53.6522	6.20362	7.9873	0.000674554	0.00422431
10498441	NM_177346	Gpr149	G protein-coupled receptor 149	1334.32	167.566	177.02	48.5984	7.96292	0.000509898	0.00361911
10502156	NM_025779	Ccdc109b	coiled-coil domain containing 109B	1459.53	184.628	162.012	45.4477	7.90525	0.000271216	0.00252873
10380285	NM_026433	Tmem100	transmembrane protein 100	1765.74	225.245	253.303	55.1244	7.83917	0.000823757	0.00472642
10467153	NM_172838	Slc16a12	solute carrier family 16 (monocarboxylic acid transporters)	752.812	96.3009	68.4721	30.9514	7.81729	4.60008e-05	0.000985344
10606868	NM_009052	Bex1	brain expressed gene 1	250.229	32.2626	21.4914	10.0277	7.75599	3.28606e-05	0.000825365
10542857	NM_178797	Far2	fatty acyl CoA reductase 2	1748.93	227.59	244.128	57.1609	7.6846	0.000719065	0.00439434
10358928	NM_009782	Cacna1e	calcium channel	735.11	95.8492	111.24	17.914	7.66944	0.00115836	0.00576349
10497689	NM_013531	Gnb4	guanine nucleotide binding protein (G protein)	2160.25	281.76	135.125	106.253	7.66697	1.05597e-06	0.000173632
10598251	NM_177914	Dgkk	diacylglycerol kinase kappa	764.833	100.459	260.644	30.3287	7.61341	0.013932	0.0259448
10461856	NM_008137	Gna14	guanine nucleotide binding protein	2145.7	288.072	292.428	84.7512	7.44847	0.000542067	0.00376115
10582694	NM_001081120	Fam89a	family with sequence similarity 89	1413.26	189.982	133.456	24.709	7.43893	0.000248425	0.00239924
10523483	NM_029947	Prdm8	PR domain containing 8	1018.81	138.187	152.447	25.8628	7.37266	0.00111569	0.00563511
10382341	NM_009217	Sstr2	somatostatin receptor 2	837.16	115.437	270.67	20.4343	7.25212	0.0126199	0.0243255
10428443	NM_026200	Kcnv1	potassium channel	1851.44	255.64	333.596	76.1638	7.24235	0.00172676	0.00724165
10474373	NM_021275	Kcna4	potassium voltage-gated channel	721.874	100.98	55.1341	25.4244	7.14868	2.20542e-05	0.000704669
10570963	NM_177086	Zmat4	zinc finger	1138.85	159.872	210.632	41.0627	7.12349	0.00206478	0.00800797
10505614	NM_031202	Tyrp1	tyrosinase-related protein 1	524.26	73.6608	201.041	12.8976	7.11722	0.0204599	0.0335075
10593767	NM_148944	Chrnb4	cholinergic receptor	1299.28	182.64	86.1838	33.486	7.11386	2.22011e-05	0.000702495
10583163	NM_013838	Trpc6	transient receptor potential cation channel	974.587	138.033	143.272	30.3341	7.06052	0.000956875	0.00514066
10565067	NM_026523	Nmb	neuromedin B	2211.96	315.258	312.307	100.749	7.01637	0.000550151	0.00379518
10559580	NM_016908	Syt5	synaptotagmin V	4553.58	650.217	463.203	154.295	7.00317	0.0001616	0.00192309
10445268	NM_001081178	Gpr116	G protein-coupled receptor 116	483.767	69.1872	103.025	22.1564	6.99215	0.00309468	0.0103
10556067	NM_021889	Syt9	synaptotagmin IX	3363.05	486.058	139.129	125.98	6.91903	9.04182e-08	6.86547e-05
10439542	NM_001007460	Zdhhc23	zinc finger	801.167	115.96	101.51	50.8708	6.909	0.000150478	0.00185139
10352815	NM_016851	Irf6	interferon regulatory factor 6	708.728	104.423	201.48	19.4665	6.7871	0.00891797	0.0196261
10592044	NM_144936	Tmem45b	transmembrane protein 45b	5884.77	867.094	585.4	300.587	6.78677	4.95452e-05	0.00100127
10563728	---			1953.84	290.409	509.908	56.6168	6.7279	0.00690768	0.0165254
10519815	NM_001110843	Cacna2d1	calcium channel	3344.77	500.964	381.77	117.451	6.67667	0.000287177	0.002588
10469255	NM_008859	Prkcq	protein kinase C	2777.93	417.319	376.987	186.781	6.6566	0.000213567	0.00223857
10547322	NM_001159533	Cacna1c	calcium channel	1803.07	275.935	221.431	31.9314	6.5344	0.000687278	0.00426562
10527332	NM_016789	Nptx2	neuronal pentraxin 2	2957.33	453.584	911.803	97.1215	6.51993	0.0113775	0.0226682
10569370	NM_009377	Th	tyrosine hydroxylase	5338.32	819.238	654.258	201.93	6.5162	0.000372554	0.00298687
10500938	NM_009520	Wnt2b	wingless related MMTV integration site 2b	908.252	140.347	141.042	24.4502	6.47145	0.00132888	0.00620887
10362186	NM_021509	Moxd1	monooxygenase	1298.91	201.427	75.5966	60.7473	6.44853	7.90623e-07	0.000150182
10519855	NM_001110843	Cacna2d1	calcium channel	5570.77	866.161	581.052	222.32	6.43157	0.000140539	0.00178973
10508368	NM_001009819	A3galt2	alpha 1	1666.34	261.656	206.597	71.2423	6.36843	0.000330642	0.0028071
10584883	NM_022004	Fxyd6	FXYD domain-containing ion transport regulator 6	2047.23	324.393	208.26	37.6456	6.31098	0.000349448	0.00289325
10529875	NM_001077398	Ldb2	LIM domain binding 2	6030.75	963.136	786.355	276.726	6.26158	0.000388294	0.00305731
10457640	NM_016740	S100a11	S100 calcium binding protein A11 (calgizzarin)	3512.51	570.72	169.185	110.439	6.15452	6.29036e-07	0.000134735
10483043	---			206.545	33.6429	49.8378	2.47857	6.13934	0.00606307	0.0152425
10563745	NM_207538	Mrgprb5	MAS-related GPR	821.828	134.056	308.308	47.6534	6.13048	0.0196241	0.0327291
10517677	NM_008675	Nbl1	neuroblastoma	2233.4	365.491	388.932	59.6431	6.1107	0.00204619	0.00796917
10419167	NM_008962	Ptgdr	prostaglandin D receptor	1054.65	173.11	149.644	37.0653	6.09235	0.000824003	0.00472459
10408268	NM_145399	Scgn	secretagogin	264.705	43.6626	63.1467	2.24624	6.0625	0.00594562	0.0150743
10443854	NM_177307	Cyp4f39	cytochrome P450	888.578	146.855	75.38	37.9607	6.05073	2.88285e-05	0.000788837
10599174	NM_133990	Il13ra1	interleukin 13 receptor	713.26	118.209	136.401	26.1379	6.03387	0.00253557	0.00914997
10495186	NR_033498	AI504432	expressed sequence AI504432	352.616	58.5011	101.703	13.1539	6.02751	0.00961002	0.0204384
10445944	NM_172829	St6gal2	beta galactoside alpha 2	1273.84	213.311	239.449	77.3052	5.97173	0.00166459	0.00708406
10486061	NM_011246	Rasgrp1	RAS guanyl releasing protein 1	5924.01	992.676	747.41	331.078	5.96772	0.000223807	0.00227455
10381994	NM_001037712	Kcnh6	potassium voltage-gated channel	1384.72	235.109	210.721	34.0645	5.8897	0.00135834	0.00628325
10350725	NM_026380	Rgs8	regulator of G-protein signaling 8	954.772	162.368	40.0461	39.8863	5.8803	1.3618e-07	7.1009e-05
10381708	NM_019679	Fmnl1	formin-like 1	1593.3	271.054	143.074	53.1822	5.87815	9.10343e-05	0.00138979
10388902	NM_010708	Lgals9	lectin	3412.69	583.229	846.585	128.579	5.85137	0.00612332	0.0153432
10404376	NM_177322	Agtr1a	angiotensin II receptor	995.991	170.559	179.687	59.1882	5.83958	0.00143332	0.00646192
10424113	NM_178920	Mal2	mal	7084.35	1213.46	755.703	403.996	5.83815	6.77817e-05	0.00120255
10488378	NM_009378	Thbd	thrombomodulin	612.188	104.875	211.905	20.8695	5.83732	0.0168023	0.0295447
10493820	NM_011313	S100a6	S100 calcium binding protein A6 (calcyclin)	2668.73	465.902	150.62	123.393	5.7281	7.33141e-07	0.000142407
10563709	NM_153095	Mrgpra1	MAS-related GPR	358.832	62.743	21.2611	11.1644	5.71908	5.21891e-06	0.000335445
10531560	NM_133738	Antxr2	anthrax toxin receptor 2	1993.77	349.781	143.92	93.602	5.70006	5.48437e-06	0.000339111
10559389	NM_203490	Mrgprd	MAS-related GPR	3103.01	545.111	716.809	146.277	5.69244	0.0046047	0.0129827
10573210	NM_013641	Ptger1	prostaglandin E receptor 1 (subtype EP1)	1213.17	213.385	40.9684	42.3686	5.68538	4.43144e-08	4.62603e-05
10499247	NM_001033124	Ntrk1	neurotrophic tyrosine kinase	3233.43	569.442	783.546	145.693	5.67824	0.00551779	0.0143914
10452613	NM_172964	Arhgap28	Rho GTPase activating protein 28	1870.35	330.184	104.618	88.9049	5.66458	6.7554e-07	0.00013446
10588592	NM_001174047	Cacna2d2	calcium channel	1480.75	264.349	164.344	26.2582	5.6015	0.000529543	0.00370503
10576854	NM_183315	Ctxn1	cortexin 1	3536.67	634.24	539.85	132.422	5.57623	0.00112208	0.00565029
10455863	NM_001134697	Ctxn3	cortexin 3	2428.36	437.725	288.039	140.269	5.54769	0.000146501	0.0018294
10400072	NM_001146196	Scin	scinderin	354.811	63.9644	8.85422	18.199	5.54701	4.00775e-06	0.000296456
10492006	NM_016984	Trpc4	transient receptor potential cation channel	515.992	93.2025	119.457	11.081	5.53625	0.00554882	0.0144453
10576460	NM_023709	Capn9	calpain 9	477.765	87.0138	26.8283	15.0781	5.49068	3.11178e-06	0.000267845
10487722	NM_001081162	Slc4a11	solute carrier family 4	850.37	155.499	74.2644	19.0788	5.46866	0.000169294	0.00196156
10424119	NM_010930	Nov	nephroblastoma overexpressed gene	610.491	111.641	66.5983	22.7859	5.46835	0.000235729	0.00233604
10406736	NM_010170	F2rl2	coagulation factor II (thrombin) receptor-like 2	5126.31	938.875	319.126	264.938	5.46005	1.34081e-06	0.000193006
10408613	NM_023716	Tubb2b	tubulin	5377.56	985.085	1135.11	217.155	5.45898	0.0036778	0.0113836
10487937	NM_144944	Prokr2	prokineticin receptor 2	941.584	172.484	70.3403	68.2299	5.45897	4.27104e-06	0.000304885
10563715	NM_153101	Mrgpra2b	MAS-related GPR	3614.15	663.82	306.725	182.426	5.44448	1.77476e-05	0.000616107
10545086	NM_001042451	Snca	synuclein	746.088	137.061	64.1482	25.5577	5.44345	6.89524e-05	0.00121609
10494821	NM_027533	Tspan2	tetraspanin 2	2073.76	381.532	61.1665	79.4507	5.43534	1.02055e-07	7.1009e-05
10418410	NM_011103	Prkcd	protein kinase C	4640.3	857.953	190.932	194.697	5.40857	1.45798e-07	7.17461e-05
10482059	NM_010283	Ggta1	glycoprotein galactosyltransferase alpha 1	748.323	138.56	54.5555	42.5281	5.40071	3.64671e-06	0.000287661
10511258	NM_026125	Fam132a	family with sequence similarity 132	1080.6	200.412	131.485	14.4228	5.3919	0.00081179	0.00468997
10464917	NM_009920	Cnih2	cornichon homolog 2 (Drosophila)	1310.39	244.872	199.193	54.1915	5.35132	0.00104112	0.00541566
10534041	NM_007941	Stx2	syntaxin 2	2485.64	465.141	55.4223	81.9111	5.34384	8.45125e-08	7.05913e-05
10354529	BC048645	1700019D03Rik	RIKEN cDNA 1700019D03 gene	736.226	137.816	67.553	49.6072	5.3421	1.46382e-05	0.000572622
10603270	NM_009757	Bmp15	bone morphogenetic protein 15	330.457	61.8994	76.5253	10.2718	5.33861	0.00542774	0.0142455
10597714	NM_011887	Scn11a	sodium channel	6148.05	1153.13	293.496	277.001	5.33164	2.97052e-07	9.54284e-05
10536363	NM_009311	Tac1	tachykinin 1	6977.96	1311.58	978.181	538.804	5.32028	0.000234729	0.00233444
10351455	NM_009063	Rgs5	regulator of G-protein signaling 5	2906.11	546.737	485.38	132.964	5.31537	0.00142523	0.00643934
10394060	NM_026907	Sectm1b	secreted and transmembrane 1B	274.451	51.7054	73.2679	5.17076	5.30797	0.00874102	0.0193642
10472958	NM_013554	Hoxd10	homeobox D10	477.559	90.1663	308.414	15.0421	5.29642	0.0866023	0.0918
10476886	NM_009219	Sstr4	somatostatin receptor 4	632.114	119.407	118.981	4.23908	5.29376	0.00325926	0.0105534
10594277	NM_028748	Paqr5	progestin and adipoQ receptor family member V	949.826	180.323	59.3277	26.4492	5.26735	1.38591e-05	0.000560969
10432408	NM_001024702	C1ql4	complement component 1	1116.56	212.594	188.007	59.0205	5.25208	0.00129053	0.00610826
10380489	NM_146025	Samd14	sterile alpha motif domain containing 14	1755.96	334.344	543.682	54.225	5.25196	0.0131295	0.0249792
10456021	NM_177407	Camk2a	calcium	5355.6	1021.15	421.617	184.407	5.24468	3.83242e-05	0.000891248
10484205	NM_001025576	Ccdc141	coiled-coil domain containing 141	673.855	128.793	16.4218	28.0825	5.2321	6.4858e-07	0.000135544
10375137	NM_031169	Kcnmb1	potassium large conductance calcium-activated channel	3263.19	625.459	288.442	114.727	5.21728	8.01147e-05	0.0013044
10599581	NM_133729	2610018G03Rik	RIKEN cDNA 2610018G03 gene	450.328	86.4968	112.261	11.1564	5.20629	0.00711959	0.0168825
10459620	NM_001082553	Rab27b	RAB27b	1331.71	255.852	68.3844	60.5515	5.20502	4.5087e-07	0.000121537
10419015	NM_130878	Cdhr1	cadherin-related family member 1	1041.58	201.399	130.583	25.8697	5.17175	0.000732633	0.00442867
10484488	NM_145526	P2rx3	purinergic receptor P2X	5128.98	997.301	872.367	297.445	5.14286	0.00123522	0.00597165
10437590	NM_025821	Carhsp1	calcium regulated heat stable protein 1	1061.46	206.538	139.953	60.5961	5.13927	0.00032051	0.00276605
10585889	NM_175235	Celf6	CUGBP	836.548	162.929	162.39	13.6691	5.13444	0.0035171	0.0110917
10484203	NM_001025576	Ccdc141	coiled-coil domain containing 141	2023.08	394.852	107.394	155.564	5.12365	7.0484e-06	0.000403395
10544660	NM_027881	Osbpl3	oxysterol binding protein-like 3	4066.94	795.348	477.496	149.956	5.11341	0.000373619	0.00299253
10592493	NM_001081121	4931429I11Rik	RIKEN cDNA 4931429I11 gene	1185.7	232.356	199.133	41.3486	5.10294	0.00182196	0.00747576
10484197	NM_001025576	Ccdc141	coiled-coil domain containing 141	3265.76	644.311	517.181	167.817	5.0686	0.00103292	0.00538304
10550394	NM_008967	Ptgir	prostaglandin I receptor (IP)	1163.92	230.624	553.923	50.2478	5.04682	0.0428106	0.055768
10546557	NM_177233	Fam19a4	family with sequence similarity 19	1036.02	206.548	60.0179	59.4246	5.01586	1.12992e-06	0.000174815
10521616	NM_001135172	C1qtnf7	C1q and tumor necrosis factor related protein 7	351.786	70.1396	64.9427	7.87864	5.01551	0.00294452	0.0099994
10411395	NM_012026	Rgnef	Rho-guanine nucleotide exchange factor	934.542	186.985	89.6587	23.7973	4.99796	0.000239564	0.00235726
10563722	NM_153067	Mrgpra3	MAS-related GPR	3325.89	672.652	441.806	224.631	4.94445	0.000240425	0.00236018
10395136	NM_001159743	Fam150b	family with sequence similarity 150	984.832	199.217	270.797	46.3944	4.94352	0.00906563	0.0198257
10593198	NM_030069	Fam55b	family with sequence similarity 55	1159.77	235.224	327.116	80.8588	4.93048	0.00875048	0.0193544
10596303	NM_019807	Acpp	acid phosphatase	5418.02	1099.07	306.438	333.225	4.92966	1.43511e-06	0.000190949
10482030	NM_013515	Stom	stomatin	993.056	201.581	214.781	51.1844	4.92634	0.00387576	0.0117227
10439514	NM_008083	Gap43	growth associated protein 43	2676.39	543.551	426.919	82.5783	4.9239	0.00165266	0.00704762
10597686	NM_009134	Scn10a	sodium channel	9321.75	1895.06	239.088	357.732	4.91897	2.22942e-07	7.76226e-05
10539894	NM_001166251	Mgll	monoglyceride lipase	1070.59	218.294	309.94	63.719	4.90436	0.0101403	0.0212045
10536499	NM_007616	Cav1	caveolin 1	801.844	163.573	114.718	41.2722	4.90205	0.000641307	0.00414987
10608709	---			884.487	180.628	346.854	39.0726	4.89674	0.0261473	0.0394928
10495083	NM_001039347	Kcnd3	potassium voltage-gated channel	2426.47	496.944	165.168	87.6168	4.88279	1.10554e-05	0.000515163
10375019	NM_008741	Nsg2	neuron specific gene family member 2	1071.33	219.947	96.0126	73.5407	4.87086	1.35111e-05	0.000555562
10501860	NM_001114665	Fnbp1l	formin binding protein 1-like	575.114	118.739	93.1143	28.2505	4.84349	0.00125365	0.00601896
10351463	ENSMUST00000027997	Rgs5	regulator of G-protein signaling 5	445.035	91.9823	127.335	20.5537	4.83827	0.010481	0.021646
10484307	NM_011356	Frzb	frizzled-related protein	1224.3	253.106	111.12	75.0423	4.83709	1.91782e-05	0.000654681
10495405	NM_172685	Slc25a24	solute carrier family 25 (mitochondrial carrier	531.408	109.934	50.9208	13.5798	4.83389	0.000244082	0.0023793
10493990	NM_016740	S100a11	S100 calcium binding protein A11 (calgizzarin)	4556.47	950.077	179.631	128.288	4.79589	1.92154e-07	7.29076e-05
10516544	NM_010471	Hpca	hippocalcin	1304.77	272.986	97.3144	92.6381	4.77963	4.91534e-06	0.000323635
10404447	NM_173052	Serpinb1b	serine (or cysteine) peptidase inhibitor	197.387	41.3148	46.3085	5.21066	4.77764	0.00627274	0.0155497
10380289	NM_026178	Mmd	monocyte to macrophage differentiation-associated	428.596	89.7732	95.3558	18.3539	4.77421	0.00476853	0.0132083
10398240	NM_001043335	Eml1	echinoderm microtubule associated protein like 1	4362.62	917.316	281.78	221.354	4.75585	2.17605e-06	0.000224836
10473022	NM_019755	Plp2	proteolipid protein 2	3167.9	667.231	229.967	171.778	4.74784	4.63874e-06	0.000315143
10349744	NM_145977	Slc45a3	solute carrier family 45	697.31	148.112	199.787	24.3081	4.70799	0.0111972	0.0224481
10557165	NM_027363	2010110P09Rik	RIKEN cDNA 2010110P09 gene	955.279	203.353	341.751	23.4115	4.69764	0.0214737	0.0346315
10519857	NM_010427	Hgf	hepatocyte growth factor	411.924	88.3305	99.0942	25.6961	4.66344	0.005438	0.0142545
10556546	NM_054084	Calcb	calcitonin-related polypeptide	3720.68	807.008	307.291	138.841	4.61047	4.82341e-05	0.000989343
10519886	NM_013657	Sema3c	sema domain	533.688	115.805	34.6191	26.6472	4.6085	2.43729e-06	0.000229031
10350742	NM_011882	Rnasel	ribonuclease L (2'	688.85	149.595	102.097	29.9115	4.60478	0.00100753	0.005287
10592420	NM_178737	AW551984	expressed sequence AW551984	281.913	61.2727	31.1026	13.6791	4.60095	0.000169873	0.00196554
10541799	NM_001163269	Lpar5	lysophosphatidic acid receptor 5	995.075	216.559	163.7	46.11	4.59494	0.00149518	0.00664402
10497752	NM_025821	Carhsp1	calcium regulated heat stable protein 1	1652.18	361.638	373.135	76.5943	4.56861	0.00505858	0.0136718
10441740	NM_026644	Agpat4	1-acylglycerol-3-phosphate O-acyltransferase 4 (lysophosphatidic acid acyltransferase	1324.5	289.92	91.3851	68.1473	4.56851	3.73652e-06	0.000289296
10407034	NM_008308	Htr1a	5-hydroxytryptamine (serotonin) receptor 1A	273.43	59.9179	15.931	7.51237	4.56342	9.7357e-06	0.000484333
10513381	NM_144904	Rod1	ROD1 regulator of differentiation 1 (S. pombe)	3831.99	840.647	628.435	163.831	4.55838	0.00159397	0.00691022
10346594	NM_001033373	Cdk15	cyclin-dependent kinase 15	1558.17	343.331	168.925	135.961	4.53839	4.08033e-05	0.000923694
10489391	NM_007398	Ada	adenosine deaminase	403.595	88.9723	61.4751	3.09226	4.53619	0.00195213	0.00777317
10608641	---			2573.74	569.958	290.945	104.588	4.51567	0.000292947	0.00262021
10604542	NM_001077202	Hs6st2	heparan sulfate 6-O-sulfotransferase 2	1403.25	311.025	204.97	78.0785	4.51169	0.000687451	0.00426352
10597945	NM_001002267	Tmem158	transmembrane protein 158	888.973	197.045	136.053	22.193	4.51151	0.00168128	0.00712603
10529923	NM_172153	Lcorl	ligand dependent nuclear receptor corepressor-like	825.086	182.915	230.19	25.7127	4.51076	0.0108304	0.0220569
10495136	NM_023186	Chia	chitinase	445.162	99.3587	36.3125	19.6584	4.48035	2.5901e-05	0.000746099
10425317	---			332.018	74.1863	162.586	5.61974	4.47546	0.0503257	0.0624141
10607602	NM_011147	Ppef1	protein phosphatase with EF hand calcium-binding domain 1	3405.17	764.258	155.489	233.412	4.45552	5.28316e-06	0.00033416
10484201	NM_001025576	Ccdc141	coiled-coil domain containing 141	2562.13	580.167	196.457	192.026	4.41619	6.97157e-06	0.000404357
10387100	NM_001034874	Shisa6	shisa homolog 6 (Xenopus laevis)	400.094	90.6381	73.5075	8.95801	4.41419	0.00321522	0.0105004
10511984	NM_027041	1700003M02Rik	RIKEN cDNA 1700003M02 gene	626.636	142.047	128.24	57.3764	4.41146	0.00201155	0.00789314
10562192	NM_008761	Fxyd5	FXYD domain-containing ion transport regulator 5	2385.8	540.883	393.451	49.376	4.41093	0.0023147	0.00865967
10608710	---			263.286	59.7404	30.4657	9.27259	4.40717	0.000426935	0.00325421
10557201	NM_019430	Cacng3	calcium channel	356.409	81.0043	128.239	11.0455	4.39988	0.0227526	0.03587
10350951	NM_022312	Tnr	tenascin R	881.85	200.573	75.7911	29.792	4.39665	8.82532e-05	0.00136603
10568948	NM_183147	Sprn	shadow of prion protein	1231.84	280.215	298.879	74.499	4.39605	0.00601184	0.0151731
10589784	NM_172928	Dclk3	doublecortin-like kinase 3	663.082	151.427	103.686	22.7526	4.37889	0.00160258	0.00693675
10548030	NM_007657	Cd9	CD9 antigen	3993.86	919.43	346.478	213.383	4.34384	2.33671e-05	0.000710849
10452854	NM_053188	Srd5a2	steroid 5 alpha-reductase 2	315.94	72.8009	167.364	9.46253	4.33977	0.061978	0.0722126
10484207	NM_001025576	Ccdc141	coiled-coil domain containing 141	860.475	199.424	77.5536	51.5585	4.31481	2.27569e-05	0.000697697
10580382	NM_001081324	Neto2	neuropilin (NRP) and tolloid (TLL)-like 2	1922.61	447.783	83.3706	104.989	4.29362	9.75283e-07	0.000166228
10357288	NM_010483	Htr5b	5-hydroxytryptamine (serotonin) receptor 5B	566.436	132.241	61.3912	21.494	4.28336	0.000278772	0.00255638
10574934	NM_175024	Nrn1l	neuritin 1-like	1203.75	281.456	178.759	58.8924	4.27686	0.000952121	0.00512171
10465521	NM_008874	Plcb3	phospholipase C	5533.61	1296.45	247.764	155.516	4.26829	8.31367e-07	0.000147706
10499348	NM_024246	Tmem79	transmembrane protein 79	1202.01	281.671	412.917	89.1686	4.26741	0.0185613	0.0315229
10595298	NM_001081243	Filip1	filamin A interacting protein 1	541.276	127.568	65.264	17.0297	4.24305	0.000614572	0.00404263
10351430	NM_009107	Rxrg	retinoid X receptor gamma	1033.17	243.509	103.084	82.1121	4.24284	2.89605e-05	0.00078914
10453256	NM_153512	Kcng3	potassium voltage-gated channel	2103.43	496.257	408.178	129.452	4.23858	0.00254168	0.00914829
10368373	NM_029881	Tmem200a	transmembrane protein 200A	837.204	199.185	87.0683	13.5136	4.20314	0.000553402	0.00380191
10497463	NM_029706	Cpb1	carboxypeptidase B1 (tissue)	369.357	87.9504	12.7825	34.7559	4.19961	0.000153332	0.00187271
10345675	NM_008719	Npas2	neuronal PAS domain protein 2	335.496	79.9045	33.4594	17.0798	4.19872	8.36395e-05	0.00134307
10489305	NM_021464	Ptprt	protein tyrosine phosphatase	1940.32	462.527	61.4196	89.5951	4.19504	6.59375e-07	0.000134275
10587633	NM_001177731	Mrap2	melanocortin 2 receptor accessory protein 2	270.977	64.956	105.253	9.97789	4.1717	0.0290258	0.042481
10456545	NM_201362	Ccdc68	coiled-coil domain containing 68	829.802	199.01	77.3019	51.9091	4.16965	2.76997e-05	0.000779144
10414537	NM_021472	Rnase4	ribonuclease	443.583	106.588	44.282	21.1654	4.16164	0.000102402	0.00151142
10441530	NM_031395	Sytl3	synaptotagmin-like 3	618.875	149.08	93.5462	36.1655	4.1513	0.000838116	0.0047695
10599187	NM_028325	Zcchc12	zinc finger	342.023	82.8144	53.5307	16.4377	4.13	0.00129017	0.00611001
10466224	NM_133246	Ms4a3	membrane-spanning 4-domains	227.536	55.186	32.9932	4.01076	4.12308	0.00168269	0.00712841
10512919	NM_001033351	Grin3a	glutamate receptor ionotropic	1234.31	299.548	171.787	86.2548	4.12058	0.000377102	0.00300602
10532346	NM_153400	P2rx2	purinergic receptor P2X	448.385	109.021	48.3659	17.4705	4.11282	0.000271006	0.0025381
10445875	NM_009770	Btg3	B-cell translocation gene 3	422.425	103.247	139.041	9.12365	4.09141	0.0191648	0.0322918
10523758	NM_001033550	Lrrc8b	leucine rich repeat containing 8 family	3886.95	960.169	760.502	134.877	4.04819	0.00384235	0.0116639
10517401	NM_001013756	Grhl3	grainyhead-like 3 (Drosophila)	675.81	167.796	64.307	20.1052	4.02756	0.000227597	0.00229631
10456161	NM_008313	Htr4	5 hydroxytryptamine (serotonin) receptor 4	783.759	195.123	68.9825	24.8902	4.01674	0.000131313	0.00172483
10355474	NM_001045533	March4	membrane-associated ring finger (C3HC4) 4	1132.29	282.443	102.697	53.3693	4.0089	5.57303e-05	0.00108213
10524909	NM_008712	Nos1	nitric oxide synthase 1	639.787	159.691	266.938	35.3612	4.00641	0.0356199	0.0489744
10496789	NM_022983	Lpar3	lysophosphatidic acid receptor 3	889.795	223.375	180.847	32.9051	3.98341	0.00434954	0.012521
10426894	NM_001081471	Gm10035	predicted gene 10035	2169.33	545.511	95.0043	105.504	3.97669	5.14603e-07	0.000126539
10405693	NM_029653	Dapk1	death associated protein kinase 1	2116.79	532.938	191.991	78.0887	3.97192	0.000113084	0.00159309
10530950	NM_001030297	Tmprss11c	transmembrane protease	341.419	86.1339	66.744	8.95632	3.96381	0.0042042	0.0122847
10462623	NM_008331	Ifit1	interferon-induced protein with tetratricopeptide repeats 1	1611.97	406.859	605.6	149.363	3.96197	0.0249302	0.0382492
10436209	NM_001033238	Cblb	Casitas B-lineage lymphoma b	1481.97	375.995	104.776	47.2062	3.94145	3.12541e-05	0.000809536
10520452	NM_031168	Il6	interleukin 6	173.769	44.1827	86.5168	6.34543	3.93296	0.05746	0.0684472
10365891	NM_172051	Tmcc3	transmembrane and coiled coil domains 3	585.379	148.912	58.5053	19.8557	3.93103	0.000242727	0.0023744
10380260	NM_009546	Trim25	tripartite motif-containing 25	609.699	155.242	113.034	24.6783	3.92742	0.00307995	0.0102714
10365769	NM_010401	Hal	histidine ammonia lyase	341.89	87.4975	69.2216	7.94864	3.90742	0.00485446	0.013349
10603346	NM_019755	Plp2	proteolipid protein 2	1872.9	483.731	167.729	127.441	3.87178	1.98587e-05	0.000670341
10386705	NM_009548	Rnf112	ring finger protein 112	907.808	234.952	77.0753	57.4145	3.8638	1.54129e-05	0.00058478
10355024	NM_027407	Ica1l	islet cell autoantigen 1-like	505.243	131.05	40.8621	26.798	3.85533	1.64234e-05	0.000600902
10381445	NM_144830	Tmem106a	transmembrane protein 106A	365.06	95.1973	48.8464	10.8975	3.83477	0.00110307	0.00560187
10416657	NM_007920	Elf1	E74-like factor 1	470.586	122.777	106.53	33.0576	3.83285	0.00486671	0.0133607
10594963	NM_001081153	Unc13c	unc-13 homolog C (C. elegans)	985.696	257.34	94.5178	70.5308	3.83033	3.0135e-05	0.000798271
10419744	NM_011405	Slc7a7	solute carrier family 7 (cationic amino acid transporter	2707.32	706.835	250.195	211.995	3.83019	2.23741e-05	0.000703495
10440621	NM_146072	Grik1	glutamate receptor	2251.29	589.637	298.864	153.963	3.8181	0.000325688	0.00277916
10571207	NM_025869	Dusp26	dual specificity phosphatase 26 (putative)	1978.42	518.284	125.515	87.4951	3.81725	3.91732e-06	0.000295024
10485213	NM_007656	Cd82	CD82 antigen	4130.8	1083.19	323.854	226.633	3.81357	1.1866e-05	0.000523224
10430968	NM_001170954	A4galt	alpha 1	1367.84	359.118	289.683	165.32	3.80888	0.00210113	0.00811506
10419966	NM_001039198	Zfhx2	zinc finger homeobox 2	1261.16	331.148	56.6685	13.8056	3.80846	2.76979e-05	0.000779144
10514177	NM_172870	Bnc2	basonuclin 2	1201.34	315.675	133.374	77.901	3.80561	0.000109093	0.00156323
10400170	NM_008858	Prkd1	protein kinase D1	726.287	191.028	145	49.3666	3.802	0.00297187	0.0100555
10491319	NM_028231	Kcnmb2	potassium large conductance calcium-activated channel	397.446	104.607	81.1101	11.4052	3.79943	0.00494638	0.0134863
10516723	NM_198959	Hcrtr1	hypocretin (orexin) receptor 1	448.025	117.919	277.167	13.646	3.79942	0.0972781	0.0992261
10565689	NM_007602	Capn5	calpain 5	2776.61	732.13	562.103	95.3327	3.7925	0.00462465	0.0130082
10477986	NM_010923	Nnat	neuronatin	734.827	193.874	235.946	17.8115	3.79022	0.0191512	0.0322819
10492330	NM_008772	P2ry1	purinergic receptor P2Y	1542.34	407.22	135.34	70.874	3.78747	5.12603e-05	0.00102526
10371796	NM_182959	Slc17a8	solute carrier family 17 (sodium-dependent inorganic phosphate cotransporter)	425.739	112.53	51.3765	15.1819	3.78335	0.000609731	0.00402028
10606016	NM_013563	Il2rg	interleukin 2 receptor	176.504	46.7422	92.5452	7.53533	3.77611	0.0671136	0.076479
10542414	NM_011216	Ptpro	protein tyrosine phosphatase	490.33	130.009	58.6881	42.8554	3.77151	0.000103729	0.00152294
10490559	NM_015730	Chrna4	cholinergic receptor	563.956	149.966	112.469	27.2659	3.76055	0.00385332	0.0116717
10579845	NM_026315	1700011L22Rik	RIKEN cDNA 1700011L22 gene	157.237	41.8327	18.3957	3.66634	3.75872	0.000791052	0.00463101
10485117	NM_011957	Creb3l1	cAMP responsive element binding protein 3-like 1	449.303	119.699	114.754	18.1004	3.75359	0.00949674	0.0202749
10362959	NM_024286	Popdc3	popeye domain containing 3	1080.27	288.105	43.2946	80.9673	3.74957	2.39336e-05	0.000710536
10430993	NR_027980	1700001L05Rik	RIKEN cDNA 1700001L05 gene	1397.8	374.621	70.0617	140.323	3.73123	0.000108964	0.00156406
10504234	NM_001081413	Unc13b	unc-13 homolog B (C. elegans)	556.389	149.16	108.978	24.8653	3.73014	0.00379359	0.0115705
10486681	NM_028799	Tgm5	transglutaminase 5	291.452	78.3127	22.897	4.06187	3.72165	0.000243434	0.00237854
10563441	NM_010129	Emp3	epithelial membrane protein 3	2325.66	625.552	162.482	142.62	3.71777	4.84191e-06	0.000323467
10604576	NM_016697	Gpc3	glypican 3	309.604	83.4267	11.472	13.8066	3.71109	3.74124e-07	0.000104147
10591643	NM_031874	Rab3d	RAB3D	1860.39	503.425	418.761	117.962	3.69547	0.00531611	0.0140852
10467887	NM_030703	Cpn1	carboxypeptidase N	507.984	137.825	43.9892	42.1748	3.68572	1.91593e-05	0.000654681
10354649	NM_001163314	Pgap1	post-GPI attachment to proteins 1	2059.82	559.694	266.25	146.341	3.68026	0.000267109	0.00251854
10483324	NM_018852	Scn9a	sodium channel	4276.93	1162.45	595.979	353.721	3.67923	0.000322302	0.00277578
10376201	NM_001083929	Gpx3	glutathione peroxidase 3	3491.74	949.784	441.139	266.355	3.67635	0.000197146	0.00214727
10354003	NM_173870	Mgat4a	mannoside acetylglucosaminyltransferase 4	1443.67	392.753	144.788	120.014	3.67577	3.8487e-05	0.000893414
10363541	NM_007494	Ass1	argininosuccinate synthetase 1	2517.83	685.751	378.613	145.065	3.67164	0.000975777	0.00520872
10348645	NM_022320	Gpr35	G protein-coupled receptor 35	808.81	220.709	72.093	30.4113	3.6646	0.000107767	0.00155759
10544089	NM_028421	Zc3hav1	zinc finger CCCH type	504.205	137.976	104.291	29.2973	3.65431	0.00409953	0.012093
10435388	NM_001012765	Adcy5	adenylate cyclase 5	911.919	250.097	65.1297	30.6	3.64626	3.18467e-05	0.000807469
10416340	NM_008115	Gfra2	glial cell line derived neurotrophic factor family receptor alpha 2	3632.74	996.981	472.893	412.28	3.64374	0.000170596	0.00196574
10351825	NM_178598	Tagln2	transgelin 2	2588.03	710.923	572.625	178.058	3.64038	0.00479486	0.0132505
10568024	NM_009898	Coro1a	coronin	913.23	251.082	186.012	21.8254	3.63718	0.00531588	0.0140891
10404606	NM_010745	Ly86	lymphocyte antigen 86	4003.39	1101.73	282.218	435.475	3.63372	8.37899e-05	0.00133856
10416777	NM_009769	Klf5	Kruppel-like factor 5	1283.34	353.656	161.881	13.7785	3.62879	0.00133879	0.00621695
10505120	NM_172868	Palm2	paralemmin 2	2533.58	699.523	135.916	56.0334	3.62187	1.56098e-05	0.000587038
10508734	NM_001081211	Ptafr	platelet-activating factor receptor	257.7	71.1763	54.6498	3.38471	3.62059	0.00631159	0.0156136
10498584	NM_001164763	Rarres1	retinoic acid receptor responder (tazarotene induced) 1	1202.26	332.133	201.634	137.179	3.61981	0.000662972	0.00419581
10494069	NM_172434	Celf3	VCUGBP	615.385	170.24	53.43	22.8237	3.61481	9.5865e-05	0.00144091
10552824	NM_009101	Rras	Harvey rat sarcoma oncogene	4044.03	1121.31	435.98	302.468	3.60651	7.08746e-05	0.00122629
10451838	NM_022025	Slc5a7	solute carrier family 5 (choline transporter)	240.439	66.6749	30.6052	4.15275	3.60614	0.00127241	0.00605682
10412719	NM_028052	Synpr	synaptoporin	1495.63	414.917	161.95	143.429	3.60465	6.36761e-05	0.00115434
10557326	NM_001008700	Il4ra	interleukin 4 receptor	1145.36	318.836	75.2739	90.5454	3.59232	1.06025e-05	0.000500296
10411527	NM_013732	Cartpt	CART prepropeptide	969.394	269.877	148.29	42.11	3.59198	0.00152516	0.00671295
10352358	NM_028408	Cnih3	cornichon homolog 3 (Drosophila)	466.213	129.983	193.912	13.1173	3.58671	0.0400718	0.0532718
10484371	NM_018782	Calcrl	calcitonin receptor-like	171.957	47.9436	73.741	7.97591	3.58666	0.0427648	0.0557518
10494945	NM_018800	Syt6	synaptotagmin VI	1329.11	371.18	96.3262	64.2698	3.58076	1.02176e-05	0.000492548
10585535	NM_027397	Isl2	insulin related protein 2 (islet 2)	4591.26	1286.66	199.978	170.133	3.56836	3.45452e-07	0.000102933
10409240	NM_013660	Sema4d	sema domain	1296.53	363.543	91.9949	63.8309	3.56638	8.1943e-06	0.000441415
10512377	NM_011124	Ccl21a	chemokine (C-C motif) ligand 21A (serine)	846.748	237.869	117.39	31.0471	3.55972	0.00118472	0.00582529
10366707	NM_016847	Avpr1a	arginine vasopressin receptor 1A	218.73	61.5857	91.6935	9.60262	3.55164	0.0408138	0.0539235
10372139	NM_024435	Nts	neurotensin	386.284	108.906	68.9543	34.0082	3.54696	0.00137462	0.00632356
10439303	NM_013803	Casr	calcium-sensing receptor	366.829	103.489	125.579	13.9693	3.54462	0.0239553	0.0371699
10352320	NM_144794	Tmem63a	transmembrane protein 63a	911.859	257.893	116.678	23.6002	3.5358	0.00112184	0.00565249
10390117	NM_013565	Itga3	integrin alpha 3	1297.66	367.868	226.804	56.2493	3.52751	0.00269114	0.00949398
10352905	NM_001111059	Cd34	CD34 antigen	1352.39	384.806	152.364	126.887	3.51448	8.08098e-05	0.00131069
10529034	NM_026770	Cgref1	cell growth regulator with EF hand domain 1	1721.35	490.339	281.27	34.5158	3.51054	0.00285921	0.00980133
10404702	NM_023887	Gcnt2	glucosaminyl (N-acetyl) transferase 2	4903.73	1397.82	160.226	335.261	3.50814	2.6601e-05	0.000761015
10458597	NM_001033426	Grxcr2	glutaredoxin	539.719	153.982	97.9459	45.8098	3.50507	0.00161293	0.00695633
10568735	NM_001113415	Ebf3	early B-cell factor 3	2258.97	645.475	261.292	119.767	3.49971	0.00027108	0.00253595
10550994	NM_007675	Ceacam10	carcinoembryonic antigen-related cell adhesion molecule 10	453.627	129.723	36.3426	14.2499	3.49689	9.17816e-05	0.0013969
10360463	NM_176916	Pld5	phospholipase D family	2602.07	745.717	587.873	193.979	3.48935	0.00520511	0.0139014
10381408	NM_027320	Ifi35	interferon-induced protein 35	534.508	153.21	65.8723	17.7196	3.48872	0.000807865	0.00468024
10455374	NM_178749	Stk32a	serine	495.963	142.176	150.975	20.4318	3.48837	0.0173745	0.0301761
10361250	NM_144817	Camk1g	calcium	866.339	249.272	126.217	90.29	3.47548	0.000342367	0.00286587
10409602	NM_012035	Trpc7	transient receptor potential cation channel	214.127	61.6446	43.3985	3.83555	3.47357	0.00569052	0.0146543
10481772	NM_178888	Garnl3	GTPase activating RANGAP domain-like 3	2538.04	730.743	140.945	161.4	3.47324	3.26641e-06	0.000270471
10516765	NM_172702	Serinc2	serine incorporator 2	2647.35	766.533	370.691	194.368	3.45367	0.000466697	0.00342901
10526261	NM_016801	Stx1a	syntaxin 1A (brain)	553.091	160.683	75.9137	21.3079	3.44212	0.00113311	0.00568186
10372028	NM_018797	Plxnc1	plexin C1	5241.93	1523.23	738.563	277.47	3.44133	0.000867033	0.00488415
10506883	NM_023537	Rab3b	RAB3B	745.508	217.006	89.503	39.8992	3.43542	0.0003453	0.00288464
10521995	NM_177006	3110047P20Rik	RIKEN cDNA 3110047P20 gene	1509.1	440.358	106.114	88.1888	3.42699	6.0692e-06	0.000362206
10443764	NM_153062	Slc37a1	solute carrier family 37 (glycerol-3-phosphate transporter)	746.016	218.214	146.589	37.156	3.41874	0.00403168	0.0119435
10517191	NM_001080712	Gm7534	predicted gene 7534	287.843	85.3036	76.3739	16.9393	3.37433	0.0110465	0.0223175
10547100	NM_026376	Plxnd1	plexin D1	2239.62	666.119	162.971	68.2375	3.36219	5.62513e-05	0.00108371
10567010	NM_015814	Dkk3	dickkopf homolog 3 (Xenopus laevis)	1281.33	381.199	192.368	105.802	3.36131	0.000609091	0.00401923
10499536	NM_010107	Efna1	ephrin A1	1209.65	360.939	77.6787	65.8541	3.35139	3.7758e-06	0.000289708
10413609	NM_181390	Mustn1	musculoskeletal	620.726	185.342	137.681	27.7747	3.34909	0.00669485	0.0161737
10553450	NM_001037906	Nell1	NEL-like 1 (chicken)	171.351	51.1932	16.1461	2.42416	3.34715	0.000534891	0.00372684
10485405	NM_009851	Cd44	CD44 antigen	1063.13	317.656	163.707	55.6254	3.3468	0.00142584	0.00643864
10445010	NM_177635	H2-M11	histocompatibility 2	310.722	92.9229	192.899	9.47739	3.34387	0.108959	0.107594
10503098	NM_001111096	Lyn	Yamaguchi sarcoma viral (v-yes-1) oncogene homolog	383.263	114.703	86.7094	24.7801	3.34134	0.00610032	0.0153039
10485718	NM_001128103	Ano3	anoctamin 3	3706.81	1110.32	373.628	258.712	3.33852	5.90862e-05	0.00111199
10443463	NM_007669	Cdkn1a	cyclin-dependent kinase inhibitor 1A (P21)	1846.13	553.434	234.666	125.887	3.33577	0.000311053	0.00272098
10455942	NR_033765	A730017C20Rik	RIKEN cDNA A730017C20 gene	2133.04	639.859	187.023	159.377	3.33361	2.25824e-05	0.000704479
10497636	---			285.501	85.7446	44.5416	19.3001	3.32966	0.00108154	0.00552271
10584549	NM_178227	Scn3b	sodium channel	3246.15	975.88	270.417	163.052	3.32639	3.26872e-05	0.000822819
10548051	NM_013568	Kcna6	potassium voltage-gated channel	1627.36	489.822	262.693	70.3333	3.32235	0.00213212	0.00819307
10472162	NM_010274	Gpd2	glycerol phosphate dehydrogenase 2	1228.46	370.323	84.2142	93.0904	3.31726	1.029e-05	0.000491693
10484463	NM_009776	Serping1	serine (or cysteine) peptidase inhibitor	3223.14	972.063	203.052	255.752	3.31578	1.34465e-05	0.000554176
10431637	NM_025815	Cpne8	copine VIII	764.316	230.815	68.7642	54.512	3.31138	2.70919e-05	0.000770046
10436304	NM_001014423	Abi3bp	ABI gene family	307.148	93.0297	111.513	9.62211	3.30161	0.030635	0.0441402
10399419	NM_023716	Tubb2b	tubulin	3305.43	1001.22	691.704	263.143	3.30142	0.00384045	0.0116623
10378754	NM_027773	Fam57a	family with sequence similarity 57	1487.36	450.724	279.531	62.4514	3.29994	0.00392606	0.0117979
10410931	NM_001081249	Vcan	versican	244.197	74.0575	65.6841	2.57284	3.2974	0.0138861	0.0258764
10540509	NM_177328	Grm7	glutamate receptor	2043.34	620.376	146.643	111.912	3.29371	8.2875e-06	0.000441112
10522324	NM_008069	Gabrb1	gamma-aminobutyric acid (GABA) A receptor	411.444	125.268	65.0535	47.8702	3.2845	0.000573977	0.00389205
10354647	ENSMUST00000097739	Pgap1	post-GPI attachment to proteins 1	102.269	31.1448	32.1112	7.69564	3.28366	0.0184208	0.0314248
10497079	NM_011196	Ptger3	prostaglandin E receptor 3 (subtype EP3)	269.722	82.16	26.7828	13.8513	3.28289	0.000118032	0.00161646
10445071	NM_001013745	Zfp57	zinc finger protein 57	315.712	96.3223	122.642	7.53814	3.27766	0.037072	0.0503741
10360972	NM_001159850	Kcnk2	potassium channel	474.003	144.859	66.4971	22.5666	3.27218	0.0010621	0.00548039
10483326	NM_018852	Scn9a	sodium channel	5664.94	1734.69	382.569	322.456	3.26567	5.38424e-06	0.000337929
10541307	NM_011909	Usp18	ubiquitin specific peptidase 18	402.522	123.549	164.593	32.3747	3.25799	0.0401844	0.0533365
10594948	NM_001081153	Unc13c	unc-13 homolog C (C. elegans)	976.514	299.806	81.5046	65.2113	3.25715	1.84734e-05	0.000636004
10471535	NM_146119	Fam129b	family with sequence similarity 129	1023.51	315.535	54.4905	50.8308	3.24372	1.43986e-06	0.000190949
10394778	NM_016677	Hpcal1	hippocalcin-like 1	4736.45	1460.88	614.924	185.045	3.24219	0.000950009	0.00511364
10356335	NM_010341	Nmur1	neuromedin U receptor 1	369.943	114.245	47.3887	14.8407	3.23816	0.0008668	0.00488613
10587023	NM_023635	Rab27a	RAB27A	835.274	258.515	118.666	50.7662	3.23104	0.000806934	0.00467809
10409261	NM_001024474	Diras2	DIRAS family	626.787	194.623	65.3016	38.8483	3.22052	0.000105887	0.00154108
10366153	NM_146240	Rassf9	Ras association (RalGDS	140.121	43.5947	25.5942	3.09849	3.21418	0.00446276	0.0127329
10538150	NM_025326	Tmem176a	transmembrane protein 176A	1465.45	455.96	246.333	95.8752	3.21398	0.0017674	0.00734206
10607486	NM_001093750	Ptchd1	patched domain containing 1	493.587	153.848	82.2403	50.7098	3.20828	0.000902417	0.00498597
10357339	NM_145100	Lypd1	Ly6	658.976	205.771	90.4721	43.0909	3.20247	0.000591498	0.00394363
10555510	NM_001143848	Pde2a	phosphodiesterase 2A	2007.63	627.181	254.505	68.7749	3.20103	0.0010002	0.00527507
10374727	NM_016707	Bcl11a	B-cell CLL	551.558	172.498	139.721	33.3391	3.19748	0.0100589	0.0210923
10425370	NM_001044308	Cacna1i	calcium channel	382.11	119.766	52.9161	11.5151	3.19048	0.00158699	0.0068907
10581479	NM_021491	Smpd3	sphingomyelin phosphodiesterase 3	543.106	170.699	180.778	29.8068	3.18166	0.0242678	0.0375223
10563170	NM_015789	Dkkl1	dickkopf-like 1	192.166	60.4538	30.1052	10.3404	3.17873	0.00162238	0.00698265
10392388	NM_011101	Prkca	protein kinase C	4490.85	1412.86	371.66	263.8	3.17855	2.24975e-05	0.000703989
10520950	NM_016861	Pdlim1	PDZ and LIM domain 1 (elfin)	1357.39	427.244	114.452	61.8742	3.17708	5.34659e-05	0.00105162
10513818	NM_019641	Stmn1	stathmin 1	7181.24	2261.83	329.613	518.452	3.17497	1.51348e-05	0.000581315
10461369	NM_009643	Ahnak	AHNAK nucleoprotein (desmoyokin)	1216.06	384.341	101.622	62.836	3.16402	3.42859e-05	0.000845257
10607113	NM_134257	Rgs3	regulator of G-protein signaling 3	2718.13	865.115	124.517	59.624	3.14194	5.84471e-06	0.000353532
10368881	NM_001034858	Armc2	armadillo repeat containing 2	306.916	97.7033	47.1408	39.5674	3.14131	0.000561922	0.00383835
10507731	NM_182929	Rims3	regulating synaptic membrane exocytosis 3	2231.3	711.146	257.738	122.116	3.13762	0.000304334	0.00268186
10409236	---			485.895	155.009	23.8691	22.2423	3.13463	9.81478e-07	0.000163905
10472181	NM_172855	Galnt5	UDP-N-acetyl-alpha-D-galactosamine:polypeptide N-acetylgalactosaminyltransferase 5	741.395	237.03	39.7722	77.3602	3.12785	0.000163908	0.00193402
10568392	NM_026418	Rgs10	regulator of G-protein signalling 10	6389.85	2049.19	393.982	726.941	3.11823	0.000212602	0.00223406
10399696	NM_001081977	Rnf144a	ring finger protein 144A	992.475	319.102	116.899	56.6235	3.11021	0.000320044	0.00276489
10567095	NM_007587	Calca	calcitonin	5870.59	1891.11	532.824	268.252	3.10431	9.59785e-05	0.00143725
10436196	ENSMUST00000084838	Cd47	CD47 antigen (Rh-related antigen	3839.97	1237.07	860.478	305.198	3.10409	0.00570567	0.0146662
10485081	NM_001166597	Dgkz	diacylglycerol kinase zeta	2927.73	943.329	249.671	48.598	3.10361	0.000377882	0.00300937
10522075	NM_175174	Klhl5	kelch-like 5 (Drosophila)	2105.91	679.472	212.074	173.665	3.09933	5.87716e-05	0.00111135
10447502	NM_009625	Adcyap1	adenylate cyclase activating polypeptide 1	5334.6	1721.85	945.797	491.755	3.09818	0.0015831	0.00687738
10485745	NM_001128103	Ano3	anoctamin 3	5111.81	1651.98	467.085	400.915	3.09435	3.4569e-05	0.000847649
10435789	ENSMUST00000114694	Zbtb20	zinc finger and BTB domain containing 20	2793.11	906.375	1053.14	242.862	3.08162	0.0338793	0.0471556
10600886	NM_029536	Gpr165	G protein-coupled receptor 165	610.918	198.489	81.3915	49.5663	3.07784	0.000355409	0.00291659
10598771	NM_173740	Maoa	monoamine oxidase A	795.243	258.918	55.2055	86.856	3.0714	0.000127083	0.00169053
10392464	NM_153782	Fam20a	family with sequence similarity 20	442.552	144.16	45.7877	11.9343	3.06988	0.000560863	0.00383739
10490794	NM_008862	Pkia	protein kinase inhibitor	1757.28	572.783	148.673	92.145	3.06797	3.88477e-05	0.000897881
10416406	NM_172812	Htr2a	5-hydroxytryptamine (serotonin) receptor 2A	866.822	283.151	84.0736	58.4306	3.06135	5.89834e-05	0.00111261
10522530	NM_001122733	Kit	kit oncogene	2108.63	689.442	372.023	105.059	3.05845	0.00311126	0.0103264
10372781	NM_028679	Irak3	interleukin-1 receptor-associated kinase 3	431.588	141.451	22.6108	21.0295	3.05116	1.54305e-06	0.000183788
10353750	NM_145392	Bag2	BCL2-associated athanogene 2	336.937	110.535	29.3673	11.3296	3.04824	0.000166307	0.00194857
10363901	NM_023794	Etv5	ets variant gene 5	1477.66	485.181	453.17	76.0364	3.04559	0.0204314	0.0334871
10578922	NM_178633	Klhl2	kelch-like 2	587.645	194.155	61.8388	37.2342	3.02668	0.000123931	0.0016645
10405280	NM_019968	Arl10	ADP-ribosylation factor-like 10	302.929	100.399	27.9329	36.3863	3.01726	0.000166921	0.00195029
10471154	NM_007494	Ass1	argininosuccinate synthetase 1	2551.81	846.397	254.412	68.6095	3.01491	0.000491512	0.00352757
10441361	NM_001122998	Tiam2	T-cell lymphoma invasion and metastasis 2	254.12	84.3731	29.1465	6.16773	3.01186	0.000965144	0.0051751
10386455	NM_009026	Rasd1	RAS	370.284	122.967	113.504	21.8856	3.01123	0.0202662	0.0333144
10386743	NM_010148	Epn2	epsin 2	1238.24	411.366	153.505	58.9312	3.01007	0.000651926	0.00416375
10538640	NM_011920	Abcg2	ATP-binding cassette	679.068	225.601	202.933	42.5357	3.01004	0.0185484	0.0315073
10572466	NM_201607	Pde4c	phosphodiesterase 4C	425.046	141.37	97.4177	8.49399	3.00662	0.00977221	0.0206781
10448925	NM_021415	Cacna1h	calcium channel	718.088	239.238	71.357	58.9327	3.00156	5.9513e-05	0.001117
10366196	NM_177373	Ppfia2	protein tyrosine phosphatase	1475.21	492.111	204.155	48.9412	2.99772	0.00163538	0.00700256
10512067	NM_172689	Ddx58	DEAD (Asp-Glu-Ala-Asp) box polypeptide 58	1315.04	439.345	126.528	79.3233	2.99318	7.50469e-05	0.00125561
10572070	NM_010934	Npy1r	neuropeptide Y receptor Y1	941.395	314.964	327.858	98.9142	2.9889	0.0266556	0.0401082
10415282	NM_011189	Psme1	proteasome (prosome	962.544	322.227	34.3993	38.6056	2.98716	3.30787e-07	0.000102414
10417601	NM_008972	Ptma	prothymosin alpha	2263.2	758.726	236.869	242.321	2.98289	0.000113898	0.00159381
10431625	NM_018803	Syt10	synaptotagmin X	252.415	84.7292	72.6331	10.2532	2.97908	0.0180286	0.0309708
10386665	NM_001033542	Slc47a2	solute carrier family 47	229.693	77.2934	58.8012	7.77286	2.9717	0.0131156	0.0249641
10512766	NM_029077	Trim14	tripartite motif-containing 14	647.016	217.829	55.8902	20.7876	2.97029	0.000182626	0.0020617
10448278	NM_001033339	Mmp25	matrix metallopeptidase 25	1127.77	380.061	184.749	115.83	2.96734	0.000973443	0.00520291
10435793	NM_007877	Drd3	dopamine receptor D3	185.429	62.5181	38.6175	1.85022	2.966	0.00776417	0.0178683
10436978	NM_173047	Cbr3	carbonyl reductase 3	192.104	65.0554	75.8027	9.06882	2.95293	0.0429513	0.0558728
10421774	NM_001081336	Dgkh	diacylglycerol kinase	6381.42	2161.39	1055.35	310.28	2.95246	0.00257724	0.00924046
10438626	NM_023794	Etv5	ets variant gene 5	1022.78	346.441	438.332	64.1526	2.95225	0.0523331	0.064076
10558049	NM_001080963	Ppapdc1a	phosphatidic acid phosphatase type 2 domain containing 1A	1022.41	346.448	91.1383	53.7448	2.95112	6.31439e-05	0.00115096
10396454	NM_172804	Syt16	synaptotagmin XVI	196.212	66.6175	34.4389	11.4686	2.94536	0.00283872	0.00975914
10395827	NM_020287	Insm2	insulinoma-associated 2	394.91	134.278	89.5586	21.1755	2.941	0.00814161	0.0184573
10483249	NM_015736	Galnt3	UDP-N-acetyl-alpha-D-galactosamine:polypeptide N-acetylgalactosaminyltransferase 3	231.791	78.9155	39.6862	12.4785	2.9372	0.00276018	0.00962778
10464365	NM_207261	Kcnk18	potassium channel	313.19	106.813	23.2351	17.8956	2.93213	1.32793e-05	0.000555541
10433163	NM_021391	Ppp1r1a	protein phosphatase 1	1269.84	433.232	151.818	47.9802	2.93109	0.000796218	0.00464173
10375713	NM_145926	Mgat4b	mannoside acetylglucosaminyltransferase 4	941.305	321.234	66.5595	30.1372	2.93028	5.15379e-05	0.0010268
10546631	NM_145148	Frmd4b	FERM domain containing 4B	945.779	323.067	205.114	29.0209	2.9275	0.00823537	0.0186193
10427428	NM_145930	AW549877	expressed sequence AW549877	1750.4	598.683	71.7873	100.871	2.92375	4.05546e-06	0.00029752
10415911	NM_001081177	Kif13b	kinesin family member 13B	548.832	187.754	131.563	19.7155	2.92314	0.0109374	0.0221829
10435791	NR_030576	Mir568	microRNA 568	343.456	117.634	152.925	33.1091	2.91969	0.0567513	0.0678546
10435769	NM_019778	Zbtb20	zinc finger and BTB domain containing 20	2130.96	731.862	720.089	123.042	2.9117	0.0283504	0.0417558
10397835	NM_172152	Slc24a4	solute carrier family 24 (sodium	178.178	61.2463	46.688	2.9893	2.90921	0.0151046	0.027515
10540984	NM_145383	Rho	rhodopsin	328.479	112.96	25.481	26.5281	2.90792	2.3568e-05	0.000714328
10483698	NM_153138	Wipf1	WAS	858.297	295.258	68.0839	45.0405	2.90694	2.69046e-05	0.000766971
10474860	NM_028117	Chst14	carbohydrate (N-acetylgalactosamine 4-0) sulfotransferase 14	544.07	187.207	90.4293	55.6684	2.90624	0.00111487	0.00563779
10585338	NM_212445	Kdelc2	KDEL (Lys-Asp-Glu-Leu) containing 2	366.846	126.283	20.4766	24.8503	2.90496	7.63868e-06	0.000422679
10587383	NM_153098	Cd109	CD109 antigen	202.865	69.8539	26.0195	8.73837	2.90414	0.000959802	0.00514977
10524621	NM_011854	Oasl2	2'-5' oligoadenylate synthetase-like 2	2475.48	854.192	278.014	231.862	2.89803	0.000129133	0.00170963
10556820	NM_145586	Tmem159	transmembrane protein 159	457.346	158.357	40.2567	29.2704	2.88808	3.82328e-05	0.000891404
10550388	NM_010320	Gng8	guanine nucleotide binding protein (G protein)	491.569	170.263	220.331	31.4798	2.88712	0.0601892	0.0706903
10586017	NM_028283	Uaca	uveal autoantigen with coiled-coil domains and ankyrin repeats	729.349	252.891	145.878	46.8785	2.88404	0.00473856	0.0131733
10384656	NM_016888	B3gnt2	UDP-GlcNAc:betaGal beta-1	891.182	309.038	192.395	47.3276	2.88373	0.00709642	0.0168467
10604620	NM_001166365	Fam122b	family with sequence similarity 122	871.3	302.368	112.042	93.5975	2.88159	0.000273749	0.00253818
10544596	NM_023056	Tmem176b	transmembrane protein 176B	3337.79	1159.57	503.745	189.231	2.87848	0.00151791	0.00670932
10594967	NM_001081153	Unc13c	unc-13 homolog C (C. elegans)	949.186	330.326	86.6412	88.0044	2.87348	5.72762e-05	0.00109289
10467420	NM_016861	Pdlim1	PDZ and LIM domain 1 (elfin)	1161.52	404.589	72.2988	35.2542	2.87087	2.46628e-05	0.00072913
10362767	NM_138315	Mical1	microtubule associated monoxygenase	1260.43	439.413	179.145	66.7579	2.86844	0.00124001	0.00598096
10547888	NM_013533	Gpr162	G protein-coupled receptor 162	443.022	154.506	103.048	32.265	2.86734	0.00802292	0.0182675
10405964	BC119515	1700001L19Rik	RIKEN cDNA 1700001L19 gene	307.656	107.755	55.4932	24.8217	2.85513	0.00242046	0.00889987
10391454	NM_012037	Vat1	vesicle amine transport protein 1 homolog (T californica)	5072.1	1777.21	238.851	128.103	2.85397	4.95811e-06	0.000323718
10446549	XM_003086079	Tmem200c	transmembrane protein 200C	241.868	85.2999	63.7992	10.3198	2.8355	0.0148967	0.027285
10359908	NM_009062	Rgs4	regulator of G-protein signaling 4	6615.74	2333.26	385.644	481.424	2.83541	1.25669e-05	0.000537043
10579347	NM_023065	Ifi30	interferon gamma inducible protein 30	470.971	166.624	50.4656	15.9288	2.82655	0.000581256	0.00391914
10608720	---			335.057	118.857	67.1195	22.8294	2.81899	0.00475486	0.0131923
10505028	ENSMUST00000107651	Slc44a1	solute carrier family 44	2165.16	768.404	704.886	284.869	2.81774	0.0217393	0.0349251
10522024	NM_019636	Tbc1d1	TBC1 domain family	637.721	226.345	34.751	27.1017	2.81748	2.64441e-06	0.000237146
10366446	NM_146010	Tspan8	tetraspanin 8	605.834	215.067	27.7354	136.842	2.81696	0.00909583	0.0198658
10554156	NM_001162532	Fam174b	family with sequence similarity 174	729.748	259.056	143.147	46.0141	2.81695	0.00463164	0.0130103
10602180	NM_177592	Tmem164	transmembrane protein 164	1132.4	402.158	94.1527	39.2847	2.81582	0.000135305	0.00174975
10597477	NM_175380	Gpd1l	glycerol-3-phosphate dehydrogenase 1-like	1235.66	439.896	297.678	89.5684	2.80898	0.00951666	0.0203019
10600419	NM_008883	Plxna3	plexin A3	585.323	208.451	36.1185	29.5045	2.80796	5.03077e-06	0.000325741
10565315	NM_010176	Fah	fumarylacetoacetate hydrolase	1784.2	636.732	91.2441	156.111	2.80212	6.7549e-05	0.00119978
10454632	NM_009793	Camk4	calcium	406.103	144.933	33.1986	37.1503	2.802	4.79117e-05	0.000988041
10455294	NM_026135	Kctd16	potassium channel tetramerisation domain containing 16	3532.4	1261.99	423.302	178.237	2.79907	0.000564986	0.00385297
10390519	NM_001163608	Plxdc1	plexin domain containing 1	303.968	108.614	9.49742	24.746	2.79862	0.00015369	0.00187434
10455259	NM_175164	Arhgap26	Rho GTPase activating protein 26	2191.53	789.642	198.778	64.8791	2.77535	0.000317587	0.00275792
10594973	NM_001081153	Unc13c	unc-13 homolog C (C. elegans)	1166.03	420.212	85.0741	98.8682	2.77487	3.12222e-05	0.000811978
10376889	NM_175002	Mmgt2	membrane magnesium transporter 2	391.568	141.114	30.7167	46.9125	2.77483	0.000245501	0.00238756
10382692	BC065414	2210020M01Rik	RIKEN cDNA 2210020M01 gene	185.684	67.0158	23.9684	3.04538	2.77075	0.00195975	0.00778863
10561247	NM_138676	Shkbp1	Sh3kbp1 binding protein 1	424.615	153.421	168.176	27.5039	2.76764	0.0465046	0.0591684
10563734	NM_153524	Mrgpra4	MAS-related GPR	155.225	56.1304	21.0606	2.66571	2.76544	0.00228681	0.00859767
10399540	NM_172574	Pqlc3	PQ loop repeat containing	3315.68	1199.06	259.739	280.465	2.76524	3.35848e-05	0.000832921
10370013	NM_010361	Gstt2	glutathione S-transferase	282.537	102.214	19.7991	6.18058	2.76416	0.000137899	0.00176688
10392943	NM_008258	Hn1	hematological and neurological expressed sequence 1	3460.99	1252.32	152.175	96.6268	2.76366	1.79683e-06	0.000203205
10464583	NM_013541	Gstp1	glutathione S-transferase	4215.39	1528.12	723.073	295.629	2.75854	0.00239139	0.00883576
10544941	NM_001159953	Pde1c	phosphodiesterase 1C	762.883	276.636	71.6068	68.037	2.75771	6.43128e-05	0.00116018
10414360	NM_001145953	Lgals3	lectin	519.048	188.362	99.0363	32.9199	2.75558	0.00428434	0.0124146
10543802	NM_175750	Plxna4	plexin A4	2780.23	1010.01	561.223	92.2651	2.75269	0.00714489	0.0169185
10373740	NM_178149	Pik3ip1	phosphoinositide-3-kinase interacting protein 1	1163	422.957	129.505	89.256	2.74969	0.000161944	0.0019217
10497862	NM_019510	Trpc3	transient receptor potential cation channel	1432.2	522.29	197.301	144.673	2.74215	0.000452809	0.00336545
10420957	NM_001162365	Ptk2b	PTK2 protein tyrosine kinase 2 beta	823.637	300.542	245.726	43.3702	2.74051	0.0219537	0.0351343
10572747	NM_001001491	Tpm4	tropomyosin 4	1928.17	703.762	89.4756	133.878	2.7398	1.56346e-05	0.000587038
10378787	NM_177709	Tusc5	tumor suppressor candidate 5	6689.05	2444.66	1028.27	434.787	2.73618	0.00154316	0.00676015
10440186	NM_174848	Crybg3	beta-gamma crystallin domain containing 3	253.378	92.632	54.5253	18.6276	2.73531	0.00639856	0.0157309
10395306	NM_029152	Efcab10	EF-hand calcium binding domain 10	103.33	37.8378	40.2809	7.19041	2.73086	0.0452139	0.0580835
10595793	NM_007502	Atp1b3	ATPase	5793.29	2124.97	595.241	381.445	2.7263	0.000126172	0.00168109
10372324	NM_009306	Syt1	synaptotagmin I	6599.48	2429.93	553.981	197.579	2.71592	0.000214203	0.00223681
10530319	NM_001038999	Atp8a1	ATPase	5167.89	1904.37	324.74	349.1	2.7137	9.83916e-06	0.000483549
10470214	NM_175462	Kcnt1	potassium channel	2574.36	948.92	141.494	75.8229	2.71294	1.14559e-05	0.000522125
10519504	NM_025618	Sri	sorcin	4971.14	1832.84	272.013	283.612	2.71225	3.88414e-06	0.000294668
10411359	NM_019755	Plp2	proteolipid protein 2	220.752	81.4573	39.8423	20.434	2.71004	0.00231968	0.00865888
10375402	NM_009616	Adam19	a disintegrin and metallopeptidase domain 19 (meltrin beta)	1327.33	489.836	177.346	36.2569	2.70973	0.0019183	0.00767137
10484486	ENSMUST00000099933	P2rx3	purinergic receptor P2X	138.688	51.198	44.8672	8.61708	2.70886	0.0276392	0.041034
10489569	NM_011125	Pltp	phospholipid transfer protein	354.318	130.937	82.0934	13.3447	2.70602	0.0110545	0.0223121
10461459	NM_173068	Syt7	synaptotagmin VII	1866.91	690.645	150.096	51.724	2.70314	0.000197271	0.00214584
10577712	NM_007401	Adam5	a disintegrin and metallopeptidase domain 5	134.194	49.7061	15.7842	4.11906	2.69975	0.00107992	0.0055246
10479698	NM_008665	Myt1	myelin transcription factor 1	978.981	363.9	97.9999	28.2882	2.69025	0.000567732	0.0038591
10448202	NM_001001491	Tpm4	tropomyosin 4	4186.57	1557.32	326.749	419.472	2.68832	8.78187e-05	0.00136082
10366994	NM_001081219	Myo1a	myosin IA	347.443	129.341	57.2644	43.3108	2.68625	0.0011748	0.00581416
10526783	NM_001013773	BC055004	cDNA sequence BC055004	155.154	57.8587	29.3344	4.42338	2.68161	0.00627312	0.015546
10344897	NM_001198565	Sulf1	sulfatase 1	786.333	293.259	78.4079	89.4612	2.68136	0.000182415	0.0020649
10557754	NM_198424	Orai3	ORAI calcium release-activated calcium modulator 3	949.036	354.015	144.869	26.9199	2.68078	0.00309467	0.010304
10399908	NM_011158	Prkar2b	protein kinase	4240.35	1582.61	237.585	361.731	2.67934	4.98461e-05	0.0010049
10597470	NM_027294	Cmtm8	CKLF-like MARVEL transmembrane domain containing 8	310.017	116.048	34.2486	9.71421	2.67146	0.00082266	0.00472662
10607156	NM_001110222	Dcx	doublecortin	213.11	79.8339	66.2838	20.3833	2.66941	0.022795	0.0359165
10482968	NM_008867	Pla2r1	phospholipase A2 receptor 1	174.89	65.5467	22.8457	5.01663	2.66818	0.00176616	0.00734787
10549447	NM_001081113	Ipo8	importin 8	1190.13	446.188	77.1623	51.8817	2.66732	1.17063e-05	0.000525494
10424796	NM_001195537	Gm10345	predicted gene 10345	266.872	100.204	75.4026	13.2005	2.66328	0.0197837	0.0328574
10594965	NM_001081153	Unc13c	unc-13 homolog C (C. elegans)	451.705	169.888	50.8673	22.8667	2.65884	0.000438793	0.00332036
10502890	NM_011372	St6galnac3	ST6 (alpha-N-acetyl-neuraminyl-2	449.573	169.161	70.1874	12.154	2.65766	0.00345461	0.0109691
10574404	NM_001035123	Setd6	SET domain containing 6	426.626	160.56	9.7426	33.7785	2.6571	0.000260072	0.00248302
10540599	NM_170673	Cpne9	copine family member IX	313.732	118.111	12.6412	28.1648	2.65624	0.000176158	0.00201042
10593233	NM_013561	Htr3a	5-hydroxytryptamine (serotonin) receptor 3A	3531.35	1332.62	991.124	290.604	2.64993	0.0172171	0.0300087
10598994	NM_007502	Atp1b3	ATPase	4449.62	1681.79	422.846	420.923	2.64576	8.86575e-05	0.00136969
10370721	NM_183426	Sbno2	strawberry notch homolog 2 (Drosophila)	849.486	321.167	186.339	48.0895	2.645	0.0085072	0.0189771
10421877	NM_019670	Diap3	diaphanous homolog 3 (Drosophila)	186.139	70.4021	40.286	7.30452	2.64393	0.00920808	0.0200063
10427895	NM_027395	Basp1	brain abundant	4104.89	1552.68	835.654	81.5077	2.64375	0.00846058	0.0189338
10594048	NM_001161535	Islr2	immunoglobulin superfamily containing leucine-rich repeat 2	292.3	111.078	19.6091	19.0784	2.63148	1.14985e-05	0.000522125
10495873	NM_008972	Ptma	prothymosin alpha	3842.29	1462.81	212.134	181.276	2.62665	3.23822e-06	0.000273404
10422176	ENSMUST00000105171	D130079A08Rik	RIKEN cDNA D130079A08 gene	315.126	120.323	124.678	25.475	2.619	0.049445	0.0616789
10556528	NM_011055	Pde3b	phosphodiesterase 3B	704.446	268.991	75.8287	66.856	2.61885	0.000146433	0.00183679
10528145	NM_181850	Grm3	glutamate receptor	221.817	84.7033	45.4428	18.02	2.61875	0.00526515	0.0139946
10456709	NM_001002239	Rpl17	ribosomal protein L17	211.123	80.6896	49.188	34.7443	2.61648	0.00628536	0.0155625
10409557	NM_012015	H2afy	H2A histone family	1907.4	729.351	297.811	188.841	2.6152	0.00106947	0.00550144
10465619	NM_201411	Flrt1	fibronectin leucine rich transmembrane protein 1	564.649	216.171	30.6813	44.3924	2.61204	3.15732e-05	0.000807298
10540493	NM_138677	Edem1	ER degradation enhancer	840.475	322.089	37.0218	57.9709	2.60945	2.00737e-05	0.000671662
10517373	NM_022980	Rcan3	regulator of calcineurin 3	1354.71	519.248	44.0882	34.1852	2.60898	1.92006e-07	7.29076e-05
10542287	NM_025778	Bcl2l14	BCL2-like 14 (apoptosis facilitator)	208.55	79.9727	31.0929	1.39808	2.60776	0.00365786	0.0113513
10365974	NM_007833	Dcn	decorin	2810.08	1078.04	1079.62	255.41	2.60666	0.0453961	0.0582191
10419073	NM_145928	Tspan14	tetraspanin 14	1729.46	664.546	163.749	65.7244	2.60248	0.000293538	0.00261989
10430974	NM_025445	Arfgap3	ADP-ribosylation factor GTPase activating protein 3	1331.06	512.382	110.841	84.9326	2.59779	3.66189e-05	0.000871101
10354432	NM_001161817	Myo1b	myosin IB	705.516	271.772	103.249	67.2926	2.59598	0.00078504	0.00460226
10505517	NM_021297	Tlr4	toll-like receptor 4	135.803	52.3634	35.3752	8.90403	2.59348	0.0150738	0.0274889
10439612	NM_172506	Boc	biregional cell adhesion molecule-related	979.862	378.391	113.883	106.895	2.58955	0.000255981	0.00245518
10605104	NM_001029868	Pdzd4	PDZ domain containing 4	513.728	198.395	169.21	44.0354	2.58942	0.0296805	0.0431069
10550906	NM_011113	Plaur	plasminogen activator	308.871	119.386	83.5113	14.7524	2.58715	0.0183496	0.0313418
10438639	NM_138650	Dgkg	diacylglycerol kinase	2415.49	933.833	442.848	78.1895	2.58664	0.00588233	0.0149637
10357249	NM_001085409	Steap3	STEAP family member 3	1472.83	569.796	240.425	168.706	2.58484	0.00127201	0.00605834
10422280	NM_001033336	Abcc4	ATP-binding cassette	735.941	284.78	119.44	11.5476	2.58424	0.0045706	0.0129302
10518069	NM_025994	Efhd2	EF hand domain containing 2	1036.33	401.126	512.564	51.2131	2.58355	0.0887013	0.0933146
10453057	NM_009994	Cyp1b1	cytochrome P450	690.043	267.273	108.746	114.476	2.58179	0.00175062	0.00730866
10366956	NM_009284	Stat6	signal transducer and activator of transcription 6	1559.61	604.125	208.282	116.898	2.58159	0.000642608	0.00414865
10500011	NM_011656	Tuft1	tuftelin 1	234.943	91.0421	49.1684	4.31759	2.5806	0.00962861	0.0204675
10601848	NM_029541	6530401D17Rik	RIKEN cDNA 6530401D17 gene	434.764	168.553	129.311	33.4622	2.57939	0.0223427	0.035431
10503448	NM_019724	Mmp16	matrix metallopeptidase 16	446.428	173.165	67.9777	34.4738	2.57806	0.00132471	0.00620328
10588731	NM_009074	Mst1r	macrophage stimulating 1 receptor (c-met-related tyrosine kinase)	236.193	91.6412	41.0621	6.11717	2.57737	0.00526893	0.0140002
10439138	NM_177357	Kalrn	kalirin	651.326	252.811	64.4445	13.374	2.57633	0.000806897	0.00468112
10585610	NM_019651	Ptpn9	protein tyrosine phosphatase	1690.52	657.894	276.094	88.2552	2.5696	0.00300805	0.0101328
10478525	NM_026323	Wfdc2	WAP four-disulfide core domain 2	183.502	71.4263	26.7361	9.78234	2.56911	0.00175516	0.00732031
10395074	NM_001093775	Myt1l	myelin transcription factor 1-like	1367.44	532.325	125.292	67.1801	2.56881	0.000133546	0.00173237
10376998	NM_178656	Pirt	phosphoinositide-interacting regulator of transient receptor potential channels	7486.3	2914.45	336.846	352.811	2.56868	1.51962e-06	0.000186736
10536483	NM_207176	Tes	testis derived transcript	410.144	159.84	18.3826	53.6101	2.56597	0.0012906	0.00610512
10555235	NM_177231	Arrb1	arrestin	3991.53	1555.65	421.861	149.673	2.56583	0.000572273	0.00388365
10599120	NM_001009947	Dock11	dedicator of cytokinesis 11	3587.45	1398.26	179.288	236.696	2.56565	1.09254e-05	0.000508707
10578521	NM_207213	Snx25	sorting nexin 25	1064.95	415.099	85.6838	91.6183	2.56553	4.86702e-05	0.000989878
10493519	NM_001113331	Shc1	src homology 2 domain-containing transforming protein C1	1603.06	625.192	502.374	192.223	2.56411	0.0234352	0.0366557
10546567	BC048939	A130022J15Rik	RIKEN cDNA A130022J15 gene	682.421	266.163	153.857	45.0373	2.56392	0.00928833	0.0200815
10489872	NM_008420	Kcnb1	potassium voltage gated channel	1853.66	723.344	203.489	62.3962	2.56263	0.000803978	0.00467068
10535956	NM_001163493	Stard13	StAR-related lipid transfer (START) domain containing 13	1469.74	573.594	198.629	116.869	2.56234	0.000642545	0.00415145
10538783	NM_175524	C130060K24Rik	RIKEN cDNA C130060K24 gene	187.524	73.265	9.91129	14.9589	2.55953	4.01119e-05	0.000917796
10584891	NM_007503	Fxyd2	FXYD domain-containing ion transport regulator 2	5899.94	2310.79	505.376	321.105	2.55321	6.39782e-05	0.00115726
10361186	NM_198247	Sertad4	SERTA domain containing 4	896.396	351.116	52.5285	113.038	2.55299	0.000721439	0.00440241
10403658	NM_010317	Gng4	guanine nucleotide binding protein (G protein)	557.517	219.015	73.6804	15.8306	2.54556	0.00203743	0.00794618
10456254	NM_001114386	Nedd4l	neural precursor cell expressed	4665.17	1835.31	382.539	192.028	2.5419	0.000100863	0.00149399
10545014	NM_146168	Vopp1	vesicular	1084.05	426.793	51.2003	61.9455	2.54	4.52952e-06	0.000312757
10429754	NM_144847	Nrbp2	nuclear receptor binding protein 2	3116.12	1228.79	249.062	68.3156	2.53592	0.000317762	0.00275658
10394674	NM_007706	Socs2	suppressor of cytokine signaling 2	3147.01	1242.11	474.4	304.036	2.53361	0.000987164	0.00523604
10462618	NM_010501	Ifit3	interferon-induced protein with tetratricopeptide repeats 3	726.107	286.696	302.929	86.0624	2.53267	0.0577028	0.0686582
10406407	NM_001042591	Arrdc3	arrestin domain containing 3	793.914	313.534	139.157	76.2587	2.53215	0.00227306	0.00856137
10394471	NM_011519	Sdc1	syndecan 1	503.138	198.782	167.005	19.8905	2.5311	0.0346332	0.0479174
10368647	NM_172508	Dse	dermatan sulfate epimerase	440.42	174.197	35.7113	46.0833	2.52828	0.000136386	0.00175558
10415413	NM_001040072	Nynrin	NYN domain and retroviral integrase containing	281.716	111.438	27.6998	25.1029	2.528	0.000103819	0.00152159
10367546	NM_001039652	Oprm1	opioid receptor	293.589	116.171	25.9093	15.3749	2.52721	9.06575e-05	0.00139029
10461423	NM_021890	Fads3	fatty acid desaturase 3	2544.69	1007.34	167.398	55.4875	2.52614	0.000119542	0.00162383
10356968	NM_013626	Pam	peptidylglycine alpha-amidating monooxygenase	2564	1016.81	167.947	167.184	2.5216	1.24367e-05	0.000531229
10350733	NM_011267	Rgs16	regulator of G-protein signaling 16	391.788	155.746	128.558	19.9655	2.51555	0.0333268	0.0466196
10444658	NM_033444	Clic1	chloride intracellular channel 1	2118.13	842.565	380.434	162.883	2.51391	0.00333544	0.0107088
10572024	NM_023689	Spock3	sparc	1716.16	682.806	43.9122	129.343	2.5134	0.000189155	0.00208745
10592251	NM_001029838	Pknox2	Pbx	1563.97	622.371	110.281	58.4961	2.51293	4.54409e-05	0.000977504
10378216	NM_016745	Atp2a3	ATPase	214.529	85.3765	56.4185	8.67335	2.51275	0.0182694	0.0312303
10500808	NM_133859	Olfml3	olfactomedin-like 3	1307.53	521.985	154.173	178.144	2.50492	0.000598661	0.00397869
10375313	NM_001045530	Ccnjl	cyclin J-like	227.382	90.8366	23.3398	7.78028	2.50319	0.000599566	0.00398154
10510422	NM_001159344	Casz1	castor homolog 1	885.544	353.778	66.2789	21.467	2.50311	0.000202901	0.00217034
10512129	NM_022305	B4galt1	UDP-Gal:betaGlcNAc beta 1	786.487	314.324	102.271	42.4609	2.50215	0.0010325	0.00538423
10406598	NM_172588	Serinc5	serine incorporator 5	3626.63	1452	364.607	171.078	2.49767	0.000296869	0.00263834
10500847	NM_133853	Magi3	membrane associated guanylate kinase	3457.9	1387.63	363.51	230.499	2.49195	0.000189286	0.00208339
10550102	NM_001083188	Lig1	ligase I	445.423	179.167	77.8398	35.3673	2.48608	0.00290104	0.00990409
10353460	NM_001160139	Kcnq5	potassium voltage-gated channel	1204.39	484.56	320.118	168.524	2.48552	0.0127558	0.0244745
10499493	NM_008227	Hcn3	hyperpolarization-activated	454.279	182.851	76.1195	17.1765	2.48442	0.00441909	0.0126558
10482517	NM_001141949	Nmi	N-myc (and STAT) interactor	300.402	121.159	16.6014	19.5689	2.4794	1.03486e-05	0.000491693
10544732	NM_018773	Skap2	src family associated phosphoprotein 2	553.244	223.142	77.4456	46.4491	2.47933	0.000809777	0.00468806
10458589	NM_029942	Prelid2	PRELI domain containing 2	102.497	41.3431	21.9538	2.07388	2.47919	0.0110252	0.0223066
10395466	NM_172803	Dock4	dedicator of cytokinesis 4	1033.46	417.075	70.4242	85.9065	2.47788	4.10907e-05	0.000922982
10467907	NM_145502	Erlin1	ER lipid raft associated 1	412.526	166.785	24.3391	29.1689	2.47341	1.66653e-05	0.000603947
10412435	NM_175538	E130304F04Rik	RIKEN cDNA E130304F04 gene	294.212	119.011	59.1314	16.1976	2.47214	0.00719765	0.0169856
10428594	NM_177225	Samd12	sterile alpha motif domain containing 12	1460.07	591.357	61.8587	54.8968	2.46902	8.76727e-07	0.000152635
10521892	NM_011402	Slc34a2	solute carrier family 34 (sodium phosphate)	139.591	56.5691	16.1678	4.45732	2.46762	0.00117901	0.00581775
10423049	NM_011169	Prlr	prolactin receptor	117.172	47.5637	37.0777	11.9591	2.46347	0.0275618	0.04097
10565705	NM_011010	Omp	olfactory marker protein	252.637	102.646	36.8454	10.4853	2.46126	0.00249342	0.00908024
10351298	NM_001081126	Gpr161	G protein-coupled receptor 161	536.288	217.903	149.996	63.9145	2.46113	0.0170145	0.0297736
10404026	NM_175661	Hist1h2af	histone cluster 1	1006.1	408.834	155.785	53.2132	2.4609	0.00259649	0.0092816
10383025	NM_019959	C1qtnf1	C1q and tumor necrosis factor related protein 1	609.526	247.959	113.911	66.9172	2.45818	0.00304621	0.0102119
10480492	NM_001042528	Cacna1b	calcium channel	2629.75	1073.24	289.795	75.332	2.4503	0.00107142	0.00549458
10556082	NM_008905	Ppfibp2	PTPRF interacting protein	273.053	111.46	36.9814	16.4148	2.44978	0.00115394	0.00574837
10554655	NM_175366	Mex3b	mex3 homolog B (C. elegans)	519.778	212.722	60.6093	17.132	2.44346	0.00120438	0.00588384
10448803	NM_198937	Hn1l	hematological and neurological expressed 1-like	948.947	388.566	81.8794	93.8922	2.44218	0.000116987	0.00161272
10523772	NM_178701	Lrrc8d	leucine rich repeat containing 8D	1132.43	463.785	146.747	68.8627	2.44171	0.000893879	0.00495519
10476814	NM_016889	Insm1	insulinoma-associated 1	550.003	225.295	39.6289	74.4903	2.44126	0.000875755	0.00490352
10429295	NM_001033876	Kcnk9	potassium channel	169.771	69.5592	44.7628	9.28939	2.44067	0.0184892	0.0314773
10388532	NM_008750	Nxn	nucleoredoxin	1581.89	648.197	338.48	178.505	2.44045	0.00585296	0.0149072
10487987	NM_177303	Lrrn4	leucine rich repeat neuronal 4	188.048	77.1301	28.6259	7.89887	2.43806	0.00300601	0.01013
10592629	NM_175481	Grik4	glutamate receptor	2168.67	890.377	76.1114	147.503	2.43567	4.64612e-05	0.000983446
10482929	NM_013825	Ly75	lymphocyte antigen 75	258.643	106.194	46.7926	5.55092	2.43556	0.00687876	0.0164751
10478364	NM_001098799	Tox2	TOX high mobility group box family member 2	619.971	254.569	26.6117	10.9714	2.43537	1.45667e-05	0.000572622
10602196	NM_001040434	Rgag1	retrotransposon gag domain containing 1	527.786	216.759	20.9358	47.8812	2.4349	0.000245449	0.00238984
10568115	NM_080638	Mvp	major vault protein	686.579	282.001	80.1672	28.0104	2.43467	0.0009535	0.00512583
10494565	NM_001161765	Fmo5	flavin containing monooxygenase 5	423.541	174.055	73.9061	29.7105	2.43337	0.00347021	0.0109978
10604347	NM_053123	Smarca1	SWI	926.437	381.172	171.865	95.0327	2.43049	0.00320679	0.0104974
10584435	NM_172767	Vwa5a	von Willebrand factor A domain containing 5A	5100.97	2098.98	149.487	366.01	2.43022	0.000114489	0.00159673
10411633	NM_008670	Naip1	NLR family	327.033	134.596	100.301	8.52964	2.42974	0.0307137	0.0442002
10512022	ENSMUST00000102975	Mobkl2b	MOB1	685.768	282.276	30.1973	85.188	2.42942	0.00117549	0.0058141
10569707	NM_001093765	Myadm	myeloid-associated differentiation marker	3847.03	1584.69	349.972	340.076	2.42762	8.94002e-05	0.00137795
10498187	NM_177854	6030405A18Rik	RIKEN cDNA 6030405A18 gene	367.916	151.594	18.8727	11.9664	2.42699	5.929e-06	0.000356397
10463224	NM_183195	Marveld1	MARVEL (membrane-associating) domain containing 1	843.322	347.974	71.6992	59.8942	2.42352	5.06895e-05	0.00101814
10541695	NM_145130	Lpcat3	lysophosphatidylcholine acyltransferase 3	1801.54	743.56	211.753	136.708	2.42286	0.000346271	0.0028841
10371466	NM_013722	Syn3	synapsin III	773.849	319.547	113.76	24.1687	2.42171	0.0031884	0.010466
10462613	NM_008332	Ifit2	interferon-induced protein with tetratricopeptide repeats 2	515.604	213.162	73.3787	54.4028	2.41883	0.000794132	0.00463604
10439881	NR_028300	5330426P16Rik	RIKEN cDNA 5330426P16 gene	1464.6	606.187	192.045	120.364	2.41609	0.000613072	0.00403594
10344653	NM_011011	Oprk1	opioid receptor	210.123	86.9694	71.1359	10.8587	2.41606	0.0389436	0.052137
10471525	NM_178595	Ptrh1	peptidyl-tRNA hydrolase 1 homolog (S. cerevisiae)	445.553	184.464	81.2662	18.53	2.4154	0.00608777	0.0152954
10592593	NM_009347	Tecta	tectorin alpha	318.508	131.881	65.623	5.36939	2.41512	0.0104877	0.0216438
10413919	NM_001001796	Prrxl1	paired related homeobox protein-like 1	1174.78	486.468	250.21	121.827	2.41492	0.00626084	0.0155479
10423647	NM_181317	Kcns2	K+ voltage-gated channel	114.931	47.5938	30.0624	4.80758	2.41482	0.0193153	0.0323756
10405253	NM_009946	Cplx2	complexin 2	732.395	303.581	187.661	87.769	2.41252	0.0126648	0.0243614
10492136	NM_019978	Dclk1	doublecortin-like kinase 1	2801.05	1161.13	326.396	193.596	2.41235	0.00038714	0.00305687
10399710	NM_021384	Rsad2	radical S-adenosyl methionine domain containing 2	277.681	115.122	149.431	15.2164	2.41206	0.11724	0.11315
10504891	NM_021436	Tmeff1	transmembrane protein with EGF-like and two follistatin-like domains 1	1071.01	444.379	117.126	96.1133	2.41014	0.000205041	0.00218205
10406334	NM_030174	Mctp1	multiple C2 domains	1030.1	427.428	193.482	98.7972	2.41	0.00371292	0.0114457
10416960	NM_175500	Gpc5	glypican 5	294.361	122.167	20.3239	24.6852	2.40949	4.80259e-05	0.000987665
10464586	NM_181796	Gstp2	glutathione S-transferase	1037.62	430.984	231.152	63.2575	2.40756	0.0105469	0.021707
10561498	NM_175319	C330005M16Rik	RIKEN cDNA C330005M16 gene	152.077	63.2878	46.9573	5.68432	2.40295	0.0314133	0.044821
10472953	NM_008273	Hoxd11	homeobox D11	335.596	139.705	145.707	15.6982	2.40217	0.0736457	0.0818133
10525893	NM_030210	Aacs	acetoacetyl-CoA synthetase	1928.44	804.238	366.037	87.4875	2.39785	0.00686085	0.0164511
10558961	NM_053082	Tspan4	tetraspanin 4	880.379	367.229	98.2475	29.4645	2.39736	0.00102041	0.00533783
10372421	NM_146241	Trhde	TRH-degrading enzyme	271.528	113.301	35.4718	28.2806	2.39651	0.000532184	0.00371107
10567626	NM_028758	Gga2	golgi associated	1468.4	613.205	106.012	99.7718	2.39463	2.35537e-05	0.000714328
10579925	NM_021356	Gab1	growth factor receptor bound protein 2-associated protein 1	1652	690.115	337.353	102.986	2.3938	0.00767364	0.0177283
10592535	NM_011436	Sorl1	sortilin-related receptor	3909.13	1633.82	776.489	325.441	2.39263	0.00558332	0.0145125
10467599	NM_015748	Slit1	slit homolog 1 (Drosophila)	2247.82	939.942	141.805	116.686	2.39145	1.00517e-05	0.000493423
10395978	BC099503	Gm527	predicted gene 527	750.273	314.089	60.0168	80.1216	2.38873	0.00019023	0.00208828
10598848	NM_199317	Phf16	PHD finger protein 16	332.075	139.081	57.7202	32.745	2.38763	0.00251362	0.00911009
10380641	NM_008268	Hoxb5	homeobox B5	361.098	151.269	56.2796	16.6353	2.38712	0.00324299	0.0105334
10569057	NM_001172101	Rnh1	ribonuclease	1991.49	834.482	162.982	61.8578	2.3865	0.00023548	0.00233634
10556616	NM_001105252	Tmc5	transmembrane channel-like gene family 5	148.467	62.242	45.8672	0.736459	2.38532	0.0328768	0.0460982
10451123	NM_022880	Slc29a1	solute carrier family 29 (nucleoside transporters)	1086.3	455.645	84.0307	71.641	2.3841	3.20251e-05	0.000810085
10458641	NM_181543	Gpr151	G protein-coupled receptor 151	128.461	53.9056	29.9336	5.68416	2.38308	0.0138501	0.0258383
10368875	NM_001034858	Armc2	armadillo repeat containing 2	265.559	111.484	15.7917	3.87552	2.38204	0.000155848	0.00187872
10415714	NM_028113	Fam123a	family with sequence similarity 123	806.919	339.07	35.9748	29.7069	2.3798	1.41972e-06	0.00019447
10607356	NM_027543	Gpr173	G-protein coupled receptor 173	474.317	199.59	35.5286	46.1961	2.37646	0.000117291	0.00161159
10351769	NM_080419	Igsf8	immunoglobulin superfamily	491.372	206.947	105.639	38.436	2.37438	0.00832765	0.0187619
10362896	NM_009846	Cd24a	CD24a antigen	9069.53	3820.36	1085.18	900.497	2.374	0.000353542	0.00291271
10441436	NM_025664	Snx9	sorting nexin 9	763.851	321.864	121.836	50.1793	2.37321	0.00259422	0.00928142
10457071	NM_025797	Cyb5	cytochrome b-5	2979.16	1256.6	106.937	343.787	2.37082	0.00113029	0.00567457
10390542	NM_031173	Cacnb1	calcium channel	1426.22	601.674	156.329	70.5072	2.37042	0.00053139	0.00371173
10576639	NM_008737	Nrp1	neuropilin 1	1306.94	551.386	88.2655	186.23	2.37028	0.00140579	0.00638956
10406031	NM_145376	Lpcat1	lysophosphatidylcholine acyltransferase 1	1012.11	427.159	45.9177	82.4313	2.3694	9.08673e-05	0.0013908
10472989	NM_010467	Hoxd1	homeobox D1	348.297	147.132	98.24	25.9764	2.36724	0.0225645	0.0356609
10426611	NM_007581	Cacnb3	calcium channel	5204.84	2199.12	562.597	186.723	2.36678	0.000833416	0.00475896
10558257	NM_173410	Gpr26	G protein-coupled receptor 26	258.464	109.269	19.9928	21.0476	2.36538	5.03404e-05	0.00101255
10604523	NM_172413	Rap2c	RAP2C	822.893	348.553	63.5193	80.4791	2.36088	0.000121656	0.00164719
10583920	NM_026189	Eepd1	endonuclease	2914.54	1235.15	113.308	239.799	2.35965	0.00014971	0.00185011
10560644	NM_008990	Pvrl2	poliovirus receptor-related 2	347.506	147.292	87.1259	14.5642	2.3593	0.0178594	0.0307941
10444135	NR_033305	AA388235	expressed sequence AA388235	427.456	182.541	145.576	34.4228	2.34169	0.0400112	0.053242
10516495	NM_001134733	CK137956	cDNA sequence CK137956	422.841	180.696	183.997	9.67738	2.34007	0.0779825	0.0852927
10584317	NM_027102	Esam	endothelial cell-specific adhesion molecule	247.086	105.706	112.536	15.6685	2.33748	0.0854398	0.0910066
10362495	NM_009925	Col10a1	collagen	255.214	109.186	58.3712	16.5893	2.33743	0.0120427	0.0235443
10364402	NM_009200	Slc1a6	solute carrier family 1 (high affinity aspartate	239.036	102.317	64.5926	11.0137	2.33623	0.022417	0.0355017
10567043	NM_025846	Rras2	related RAS viral (r-ras) oncogene homolog 2	464.208	199.014	87.9634	60.6478	2.33255	0.00355409	0.0111662
10502881	NM_012028	St6galnac5	ST6 (alpha-N-acetyl-neuraminyl-2	1359.25	583.119	198.526	90.6655	2.331	0.00171498	0.00722851
10458247	NM_178005	Lrrtm2	leucine rich repeat transmembrane neuronal 2	3655.01	1568.25	729.293	188.049	2.33063	0.00827091	0.0186693
10503835	NM_027491	Rragd	Ras-related GTP binding D	1344.55	578.214	35.0697	74.3395	2.32535	2.95619e-05	0.000795107
10422518	NM_028651	Tmtc4	transmembrane and tetratricopeptide repeat containing 4	1521.25	654.609	341.011	87.7016	2.32391	0.0119405	0.0234102
10359734	NM_028759	Dcaf6	DDB1 and CUL4 associated factor 6	1314.79	566.341	66.914	99.7819	2.32155	4.2742e-05	0.000946196
10376832	NM_007413	Adora2b	adenosine A2b receptor	204.453	88.2334	16.7683	10.5951	2.31718	7.31177e-05	0.00124374
10526459	NM_133914	Rasa4	RAS p21 protein activator 4	340.402	147.119	49.3658	8.81127	2.31379	0.00363759	0.0113052
10424126	NM_001037937	Depdc6	DEP domain containing 6	2227.05	963.094	135.39	79.4009	2.31239	2.15003e-05	0.000693479
10468307	---			379.285	164.075	63.9665	42.0964	2.31166	0.00219047	0.00834435
10461934	NM_153417	Trpm6	transient receptor potential cation channel	156.24	67.6866	28.5723	2.00786	2.30828	0.0082761	0.018676
10481210	NM_009500	Vav2	vav 2 oncogene	577.22	250.423	41.8391	31.1618	2.30498	2.81033e-05	0.000785108
10424676	NM_001164036	Ly6e	lymphocyte antigen 6 complex	677.125	294.374	279.82	104.947	2.30022	0.065287	0.0749907
10570278	---			127.698	55.5158	8.80559	5.48779	2.30022	3.32463e-05	0.000830398
10544133	NM_172893	Parp12	poly (ADP-ribose) polymerase family	708.472	308.396	90.2399	75.5802	2.29728	0.000564014	0.00384949
10362005	NM_026203	Ahi1	Abelson helper integration site 1	1098.47	478.369	231.77	72.6616	2.29629	0.00928799	0.0200859
10557470	NM_024228	Gdpd3	glycerophosphodiester phosphodiesterase domain containing 3	167.777	73.2246	8.34864	11.4803	2.29127	2.20474e-05	0.000704169
10357488	NM_010016	Cd55	CD55 antigen	2690.05	1175.64	442.357	320.425	2.28816	0.00196765	0.0078015
10433702	NM_033564	Mpv17l	Mpv17 transgene	695.806	304.257	62.3074	74.6714	2.2869	0.000230121	0.00230507
10389816	NM_028011	Tom1l1	target of myb1-like 1 (chicken)	498.82	218.257	35.2959	56.5352	2.28547	0.000376414	0.0030034
10508805	NM_153423	Wasf2	WAS protein family	706.547	309.263	42.8278	48.9064	2.28461	2.07018e-05	0.000678148
10599927	NM_008032	Aff2	AF4	1193.34	522.343	228.064	97.0267	2.28459	0.00543355	0.0142518
10398075	NM_009252	Serpina3n	serine (or cysteine) peptidase inhibitor	7343.5	3215.57	351.026	680.266	2.28374	0.000222064	0.00226511
10542355	NM_010128	Emp1	epithelial membrane protein 1	541.761	237.303	163.492	77.632	2.28299	0.025343	0.0386271
10362314	NM_008983	Ptprk	protein tyrosine phosphatase	817.469	358.153	247.143	31.3071	2.28246	0.0327816	0.046042
10583586	NM_152808	Slc44a2	solute carrier family 44	2277.56	998.729	411.883	234.774	2.28045	0.00342242	0.0109084
10411171	NM_172263	Pde8b	phosphodiesterase 8B	958.378	420.6	103.72	76.1609	2.2786	0.000248504	0.00239723
10363312	NM_001162956	Ccdc138	coiled-coil domain containing 138	131.419	57.6843	18.7052	6.25594	2.27825	0.00240662	0.0088685
10491272	NM_001134385	Gpr160	G protein-coupled receptor 160	191.54	84.0872	18.5807	13.6696	2.27787	0.00014075	0.00178697
10577996	NM_153135	Unc5d	unc-5 homolog D (C. elegans)	276.357	121.501	29.0191	17.6192	2.27453	0.000280156	0.00255784
10541114	NM_027526	Rasgef1a	RasGEF domain family	2665.78	1172.03	564.79	133.049	2.2745	0.0109174	0.0221585
10498998	NM_172681	D930015E06Rik	RIKEN cDNA D930015E06 gene	958.871	422.681	72.0544	81.0539	2.26855	6.71407e-05	0.00119776
10397736	NM_001164427	Kcnk13	potassium channel	319.307	140.843	68.7444	7.86534	2.26712	0.013252	0.0251493
10497051	NM_001039094	Negr1	neuronal growth regulator 1	972.485	428.971	259.569	83.5116	2.26702	0.0198641	0.0329516
10464704	NM_130863	Adrbk1	adrenergic receptor kinase	3187.62	1406.59	305.5	132.428	2.26621	0.000384955	0.00304249
10517287	NM_207237	Man1c1	mannosidase	1567.95	692.627	265.025	79.3082	2.26378	0.00480396	0.0132625
10501265	NM_010306	Gnai3	guanine nucleotide binding protein (G protein)	939.081	415.171	90.7279	108.486	2.26191	0.000358343	0.00293202
10586491	NM_010019	Dapk2	death-associated protein kinase 2	199.544	88.2192	25.1439	8.60334	2.26191	0.00156225	0.00681162
10416090	NM_019675	Stmn4	stathmin-like 4	296.819	131.249	52.6237	5.49915	2.26149	0.00771955	0.017795
10553842	NM_130880	Otud7a	OTU domain containing 7A	1025.02	453.638	112.636	24.5291	2.25956	0.00147408	0.0065888
10582985	NM_009807	Casp1	caspase 1	189.056	83.7244	52.688	16.3891	2.25808	0.023108	0.0362797
10564272	NM_007390	Chrna7	cholinergic receptor	1978.29	876.772	652.555	193.478	2.25633	0.0381381	0.0514046
10423505	NM_181588	Cmbl	carboxymethylenebutenolidase-like (Pseudomonas)	1461.89	648.722	198.609	254.061	2.25349	0.00276788	0.00963855
10401708	NM_022414	Ngb	neuroglobin	281.054	124.721	59.0717	19.035	2.25346	0.00947872	0.0202468
10466374	NM_011600	Tle4	transducin-like enhancer of split 4	1178.23	522.879	35.0799	79.4467	2.25334	9.1259e-05	0.00139183
10442643	NM_019730	Nme3	non-metastatic cells 3	724.057	321.336	118.225	29.6262	2.25327	0.00484251	0.0133425
10560685	NM_033601	Bcl3	B-cell leukemia	484.817	215.196	122.544	18.5699	2.25291	0.0204429	0.0334994
10568536	NM_018867	Cpxm2	carboxypeptidase X 2 (M14 family)	158.311	70.2705	21.1508	6.82395	2.25288	0.00206532	0.00800635
10568792	NM_021302	Stk32c	serine	546.815	242.809	165.981	48.9861	2.25204	0.0303017	0.0437883
10388352	NM_197943	Sgsm2	small G protein signaling modulator 2	533.233	237.133	74.5085	20.6131	2.24867	0.00276026	0.00962403
10598933	NM_145628	Usp11	ubiquitin specific peptidase 11	957.958	426.012	113.065	48.1091	2.24866	0.00092384	0.00503113
10449356	NM_001002895	AI413582	expressed sequence AI413582	1186.99	528.09	410.616	127.827	2.2477	0.0434892	0.0563269
10543466	NM_010338	Gpr37	G protein-coupled receptor 37	432.397	192.505	38.8985	22.5055	2.24617	0.000157594	0.0018943
10361152	NM_181796	Gstp2	glutathione S-transferase	282.077	125.664	51.0761	18.7564	2.2447	0.00532312	0.0140949
10424437	---			384.768	171.548	25.1895	38.5633	2.24291	0.000207525	0.00219729
10563314	NM_027903	Dhdh	dihydrodiol dehydrogenase (dimeric)	1070.77	477.992	217.303	91.7158	2.24014	0.00718079	0.0169554
10442240	NM_001008501	Zfp760	zinc finger protein 760	415.267	185.495	49.9183	25.3142	2.2387	0.000751883	0.00450914
10492169	NM_010750	Mab21l1	mab-21-like 1 (C. elegans)	283.532	126.761	51.4558	15.5172	2.23674	0.00622982	0.0154939
10350594	NM_054102	Ivns1abp	influenza virus NS1A binding protein	3517.05	1573.18	947.745	188.938	2.23563	0.0238838	0.037121
10396161	NM_028339	Tmx1	thioredoxin-related transmembrane protein 1	1417.33	634.572	131.115	133.851	2.23352	0.000160116	0.00191635
10490736	NM_026446	Rgs19	regulator of G-protein signaling 19	585.343	262.087	155.308	20.4931	2.23339	0.0241441	0.0374003
10603764	NM_010883	Ndp	Norrie disease (pseudoglioma) (human)	804.495	360.671	190.655	139.613	2.23055	0.0110859	0.0223484
10448182	NR_030484	Mir703	microRNA 703	1502.25	673.809	127.322	351.586	2.22948	0.0130058	0.0248287
10566161	NM_198012	Trim68	tripartite motif-containing 68	373.397	167.549	106.595	33.8583	2.22858	0.0254605	0.0387497
10367224	NM_019963	Stat2	signal transducer and activator of transcription 2	1153.88	518.098	121.743	88.0487	2.22715	0.0002424	0.00237399
10571371	NM_030254	Tusc3	tumor suppressor candidate 3	1442.52	647.739	47.8036	126.879	2.22701	0.000382492	0.00303739
10535282	NM_175362	Card11	caspase recruitment domain family	294.736	132.357	49.5422	7.48653	2.22682	0.00649507	0.0158608
10527538	NM_026864	Rasl11a	RAS-like	426.685	191.667	158.988	15.8339	2.22618	0.0589699	0.0697388
10497214	NM_001025261	Tpd52	tumor protein D52	2676.49	1202.44	268.572	94.8766	2.22589	0.00069294	0.00428484
10599925	NM_019637	Styx	serine	288.469	129.749	45.4548	35.2162	2.22328	0.00181095	0.00745988
10551009	NM_025284	Tmsb10	thymosin	2912.34	1310.87	902.158	126.251	2.22169	0.03672	0.0500341
10372069	NM_007706	Socs2	suppressor of cytokine signaling 2	538.949	242.836	75.8389	34.7179	2.21939	0.00171808	0.00723064
10352725	NM_025864	Tmem206	transmembrane protein 206	828.317	373.232	37.5426	72.8822	2.21931	0.000196901	0.0021474
10505000	NM_025623	Nipsnap3b	nipsnap homolog 3B (C. elegans)	719.16	324.271	77.4266	62.4917	2.21778	0.000263801	0.0024958
10566144	NM_009277	Trim21	tripartite motif-containing 21	243.055	109.601	23.0148	23.6104	2.21764	0.000191175	0.0020959
10606186	NM_009197	Slc16a2	solute carrier family 16 (monocarboxylic acid transporters)	771.525	348.197	44.6179	70.7593	2.21577	0.000150687	0.00185123
10468980	BC021353	Fam107b	family with sequence similarity 107	335.276	151.342	30.8577	31.7835	2.21536	0.000166062	0.00195117
10408666	NM_145938	Rpp40	ribonuclease P 40 subunit (human)	113.287	51.1838	10.8842	8.22687	2.21333	0.000147735	0.00183931
10504450	NM_027450	Glipr2	GLI pathogenesis-related 2	702.2	317.557	139.934	26.4933	2.21126	0.0103811	0.0215035
10408077	NM_178183	Hist1h2ak	histone cluster 1	490.979	222.052	100.792	14.7553	2.2111	0.0119078	0.0233735
10359201	NM_001159965	Ralgps2	Ral GEF with PH domain and SH3 binding motif 2	628.933	284.453	120.838	47.7956	2.21102	0.00644923	0.0157997
10470614	NM_001033874	1190002A17Rik	RIKEN cDNA 1190002A17 gene	399.74	180.98	66.9257	19.0617	2.20875	0.00513325	0.0137799
10497475	NM_175086	Agtr1b	angiotensin II receptor	372.424	168.69	50.3235	12.7939	2.20774	0.00275741	0.00962213
10439005	NM_025800	Ppp1r2	protein phosphatase 1	1951.15	884.174	160.598	112.355	2.20675	7.31593e-05	0.00124291
10601595	BC027572	3110007F17Rik	RIKEN cDNA 3110007F17 gene	480.714	218.08	160.032	113.708	2.2043	0.0406642	0.0537855
10431326	NM_133241	Mlc1	megalencephalic leukoencephalopathy with subcortical cysts 1 homolog (human)	392.92	178.329	13.5603	26.3236	2.20334	6.11829e-05	0.00113362
10465500	NM_008431	Kcnk4	potassium channel	1152.67	523.252	314.704	26.789	2.2029	0.0275284	0.0409348
10438572	NM_001001881	2510009E07Rik	RIKEN cDNA 2510009E07 gene	1336.88	607.411	67.9737	26.0594	2.20094	4.76614e-05	0.000988799
10405994	NM_138596	Med10	mediator of RNA polymerase II transcription	1596.23	725.718	115.751	115.179	2.19951	4.01497e-05	0.000917796
10448247	NM_009555	Zfp40	zinc finger protein 40	1045.19	475.322	150.716	97.7522	2.19892	0.00129218	0.00610224
10527870	NM_013823	Kl	klotho	114.331	52.0611	27.4864	4.80153	2.19609	0.0184636	0.0314593
10459262	NM_198649	Ablim3	actin binding LIM protein family	1156.57	526.653	76.9275	56.7813	2.19607	2.21293e-05	0.000704669
10477035	NM_001040689	Rspo4	R-spondin family	190.614	86.8978	35.5156	15.8072	2.19354	0.00537572	0.0141847
10554240	NM_020583	Isg20	interferon-stimulated protein	318.229	145.078	34.6478	20.8163	2.1935	0.000388108	0.00306162
10419779	NM_145462	Haus4	HAUS augmin-like complex	564.95	257.561	146.557	34.1131	2.19347	0.0217318	0.0349197
10593628	NM_175562	Rab39	RAB39	846.075	386.091	63.5011	77.7429	2.19138	0.000118732	0.00162338
10457820	NM_001161483	Nol4	nucleolar protein 4	229.365	104.79	29.6574	15.9957	2.18881	0.0010056	0.00529019
10586759	NM_016787	Bnip2	BCL2	857.367	392.021	175.19	74.96	2.18705	0.00781903	0.0179648
10385747	NM_199299	Phf15	PHD finger protein 15	547.817	250.515	44.4857	36.5421	2.18676	6.08818e-05	0.00113057
10592515	NM_176860	Ubash3b	ubiquitin associated and SH3 domain containing	2829.01	1296.01	288.235	213.256	2.18286	0.000216651	0.00225112
10594969	NM_001081153	Unc13c	unc-13 homolog C (C. elegans)	924.276	424.105	127.003	30.6605	2.17936	0.00311311	0.0103284
10439766	NM_021496	Pvrl3	poliovirus receptor-related 3	787.991	362.502	115.366	82.004	2.17376	0.00138244	0.00634207
10540298	NM_007697	Chl1	cell adhesion molecule with homology to L1CAM	1743.43	802.495	241.236	206.088	2.17252	0.00111727	0.00563969
10390258	NM_028965	Snx11	sorting nexin 11	649.768	299.274	20.9564	48.0933	2.17115	0.000155878	0.00187638
10526553	NM_001039385	Vgf	VGF nerve growth factor inducible	644.526	296.911	369.897	96.898	2.17077	0.155465	0.13793
10363921	NM_023115	Pcdh15	protocadherin 15	128.858	59.371	17.5891	4.43319	2.17039	0.00300154	0.0101231
10387316	NM_146019	Chd3	chromodomain helicase DNA binding protein 3	1585.66	730.681	68.2516	64.8049	2.17012	1.83643e-06	0.000199628
10604292	NM_011855	Odz1	odd Oz	737.281	339.971	213.233	36.4302	2.16866	0.0317422	0.0450746
10574166	NM_153507	Cpne2	copine II	3319.1	1531.66	180.594	313.065	2.16699	0.000226593	0.00228895
10569102	NM_016850	Irf7	interferon regulatory factor 7	126.079	58.1935	29.5505	11.331	2.16655	0.0137369	0.025696
10383472	NM_133223	Rac3	RAS-related C3 botulinum substrate 3	2191.43	1011.9	348.874	231.221	2.16566	0.00213463	0.00819519
10365518	NM_175331	Nt5dc3	5'-nucleotidase domain containing 3	1810.79	837.028	127.04	134.7	2.16336	4.4362e-05	0.000960926
10559297	NM_001042760	Slc22a18	solute carrier family 22 (organic cation transporter)	670.042	309.774	141.421	40.9634	2.16301	0.0112864	0.0225566
10540122	NM_009320	Slc6a6	solute carrier family 6 (neurotransmitter transporter	263.19	121.971	60.7032	18.0244	2.1578	0.0148134	0.0271563
10593646	NM_001033535	Tnfaip8l3	tumor necrosis factor	179.582	83.2339	29.7294	5.37711	2.15755	0.00643015	0.0157714
10494016	NM_025416	Them5	thioesterase superfamily member 5	136.311	63.265	41.3301	4.55929	2.15461	0.0376397	0.0509053
10419062	NM_177816	Sh2d4b	SH2 domain containing 4B	265.967	123.451	28.0919	14.1997	2.15443	0.000501167	0.00356623
10341595	---			615.146	285.695	281.09	148.541	2.15316	0.0984258	0.100079
10534679	NM_201373	Trim56	tripartite motif-containing 56	568.44	264.116	24.1859	24.2294	2.15224	2.03463e-06	0.000211983
10461844	NM_008139	Gnaq	guanine nucleotide binding protein	5244.19	2436.7	390.716	319.637	2.15217	4.07786e-05	0.000923694
10605465	NM_016979	Prkx	protein kinase	4758.59	2213.33	721.889	351.681	2.14997	0.00237941	0.00881098
10355567	NM_027154	Tmbim1	transmembrane BAX inhibitor motif containing 1	1126.8	524.322	179.283	131.319	2.14905	0.00214979	0.00823824
10429691	NM_134087	Fam83h	family with sequence similarity 83	239.296	111.428	37.2174	13.9777	2.14754	0.0034829	0.0110087
10444895	NM_008027	Flot1	flotillin 1	1990.25	927.628	369.496	145.73	2.14553	0.00626709	0.0155449
10427402	NM_010284	Ghr	growth hormone receptor	1326.87	618.638	80.3783	144.401	2.14482	0.000484123	0.00349556
10410124	NM_009984	Ctsl	cathepsin L	8123.93	3789.46	955.246	589.565	2.14382	0.000583513	0.00392485
10399421	NM_008709	Mycn	v-myc myelocytomatosis viral related oncogene	298.017	139.05	54.4012	19.4076	2.14323	0.0063936	0.015728
10498710	NM_009738	Bche	butyrylcholinesterase	462.969	216.209	97.0131	73.4154	2.1413	0.00774941	0.017854
10481393	NM_025428	Zdhhc12	zinc finger	767.721	358.576	111.506	41.3029	2.14103	0.00279297	0.00967751
10481175	NM_025376	Tmem8c	transmembrane protein 8C	379.669	177.694	25.0422	33.3409	2.13664	0.000108172	0.00155805
10501734	NM_023245	Palmd	palmdelphin	3108.05	1455.59	131.185	316.37	2.13524	0.000643528	0.00414498
10464030	NM_007417	Adra2a	adrenergic receptor	211.853	99.2325	81.1057	14.0953	2.13492	0.0670726	0.0764635
10349872	---			258.927	121.362	28.9501	22.1796	2.1335	0.000382598	0.00303535
10490966	NM_001163537	Dnajc5b	DnaJ (Hsp40) homolog	136.316	63.9795	32.7112	5.07708	2.13062	0.0200973	0.0331804
10401244	NM_134156	Actn1	actinin	1356.84	637.367	96.9832	53.3194	2.12883	7.69568e-05	0.00127631
10527158	NM_007984	Fscn1	fascin homolog 1	663.642	311.792	189.922	27.6635	2.12847	0.0327254	0.0460172
10504206	BC057092	N28178	expressed sequence N28178	6123.84	2879.96	336.946	202.958	2.12637	1.69084e-05	0.000605934
10432972	NM_011244	Rarg	retinoic acid receptor	445.925	209.757	47.1679	23.2649	2.12591	0.000555075	0.00380402
10432362	NM_026967	Rhebl1	Ras homolog enriched in brain like 1	281.672	132.629	47.3657	22.9727	2.12376	0.00374544	0.0114823
10357051	NM_027534	Kdsr	3-ketodihydrosphingosine reductase	1425.85	671.4	107.777	114.608	2.1237	7.51278e-05	0.00125477
10559820	NM_172738	5730403M16Rik	RIKEN cDNA 5730403M16 gene	783.391	369.169	81.6801	46.7015	2.12204	0.000396548	0.00309026
10433953	NM_023249	Ypel1	yippee-like 1 (Drosophila)	350.524	165.257	36.3912	8.55669	2.12109	0.00138435	0.00634385
10606301	NM_001190409	Magt1	magnesium transporter 1	754.781	355.945	72.8885	81.9842	2.1205	0.000366287	0.00296795
10553015	NM_009737	Bcat2	branched chain aminotransferase 2	1224.94	577.812	159.383	67.7667	2.11996	0.00163116	0.0069988
10521331	BC116928	A930005I04Rik	RIKEN cDNA A930005I04 gene	277.123	130.79	76.5549	5.73691	2.11885	0.0311225	0.0445735
10532984	NM_019682	Dynll1	dynein light chain LC8-type 1	808.898	381.944	76.4835	35.858	2.11784	0.000390723	0.00307065
10407291	NM_172595	Arl15	ADP-ribosylation factor-like 15	1000.19	472.762	92.4933	56.1387	2.11564	0.000204936	0.00218372
10526120	NM_001130476	Tpst1	protein-tyrosine sulfotransferase 1	1351.77	639.032	205.341	94.1613	2.11533	0.00271373	0.00953742
10542040	NM_181402	Parp11	poly (ADP-ribose) polymerase family	514.114	243.227	7.15836	46.5641	2.11372	0.00113499	0.00568787
10542317	NM_009875	Cdkn1b	cyclin-dependent kinase inhibitor 1B	171.988	81.4966	52.4021	11.5158	2.11037	0.0377036	0.0509587
10359816	NM_175170	Pogk	pogo transposable element with KRAB domain	561.723	266.335	72.0847	29.7276	2.10908	0.00164068	0.00701804
10569542	NM_175534	Mrgpre	MAS-related GPR	885.806	420.173	33.2393	20.3446	2.10819	2.53074e-06	0.00023484
10603431	NM_011514	Suv39h1	suppressor of variegation 3-9 homolog 1 (Drosophila)	580.34	275.544	32.5334	44.5534	2.10616	5.86933e-05	0.00111197
10500802	NM_174875	Atg4a	autophagy-related 4A (yeast)	1601.34	760.636	181.678	269.768	2.10527	0.00307308	0.010269
10594251	NM_024245	Kif23	kinesin family member 23	126.914	60.3393	44.5753	5.14964	2.10335	0.057274	0.0682841
10382321	NM_008425	Kcnj2	potassium inwardly-rectifying channel	127.684	60.7107	32.8559	12.6794	2.10316	0.0201965	0.0332718
10573172	NM_009904	Clgn	calmegin	2778.88	1321.4	273.917	160.137	2.10299	0.000305139	0.00268612
10503695	NM_001109661	Bach2	BTB and CNC homology 2	475.848	226.318	64.6053	27.7565	2.10256	0.00194718	0.00776457
10472408	NM_153409	Csrnp3	cysteine-serine-rich nuclear protein 3	2084.87	991.705	83.2745	79.4999	2.10231	1.40764e-06	0.000196319
10546476	NM_001029850	Magi1	membrane associated guanylate kinase	1685.45	801.756	58.624	106.837	2.1022	4.71056e-05	0.000988627
10489506	NM_029325	Spinlw1	serine protease inhibitor-like	152.155	72.4296	19.2971	10.3612	2.10074	0.00108689	0.00554326
10449551	NM_153166	Cpne5	copine V	157.893	75.2234	2.4166	9.58858	2.09899	0.000228154	0.00229915
10392415	NM_011268	Rgs9	regulator of G-protein signaling 9	483.862	230.661	93.9629	42.5277	2.09772	0.0071327	0.016904
10565250	NM_030705	Mesdc1	mesoderm development candidate 1	299.418	142.854	55.9504	33.6223	2.09597	0.00511666	0.0137575
10524169	NM_011132	Pole	polymerase (DNA directed)	133.622	63.8333	11.6291	8.36145	2.0933	0.000119015	0.00162194
10408450	NM_009238	Sox4	SRY-box containing gene 4	307.423	146.907	38.7966	23.7814	2.09264	0.000902435	0.00498278
10547976	NM_145391	Tapbpl	TAP binding protein-like	466.155	222.778	30.5943	33.4993	2.09246	4.08574e-05	0.000920967
10529937	NM_030265	Kcnip4	Kv channel interacting protein 4	7317.98	3501.39	917.845	729.605	2.09002	0.000763534	0.00453345
10436182	NM_010581	Cd47	CD47 antigen (Rh-related antigen	4110.1	1967.1	83.8215	252.4	2.08942	0.000158171	0.00189578
10502071	NM_027482	5730508B09Rik	RIKEN cDNA 5730508B09 gene	793.172	379.944	110.076	41.6368	2.0876	0.00251639	0.00911225
10395142	NM_013709	Sh3yl1	Sh3 domain YSC-like 1	206.007	98.7265	36.6666	25.9824	2.08665	0.00406844	0.0120311
10379013	NM_008028	Flot2	flotillin 2	3396.55	1628.64	712.977	352.925	2.08551	0.00914466	0.0199255
10372891	NM_001081037	Srgap1	SLIT-ROBO Rho GTPase activating protein 1	1776.42	851.964	172.228	135.201	2.08508	0.00020092	0.00216859
10406419	NM_030257	Lysmd3	LysM	487.114	233.644	66.6745	52.4613	2.08486	0.00119731	0.00586648
10346843	NM_001077403	Nrp2	neuropilin 2	918.36	440.678	183.311	59.0214	2.08397	0.00997021	0.0209801
10461723	BC038020	Fam111a	family with sequence similarity 111	116.011	55.6685	40.9517	12.8139	2.08396	0.0547155	0.0661687
10557960	NM_009365	Tgfb1i1	transforming growth factor beta 1 induced transcript 1	1372.01	658.473	152.833	106.01	2.08362	0.000442928	0.00333353
10516529	NM_172875	Adc	arginine decarboxylase	1009.15	484.961	169.992	51.9181	2.08089	0.00594121	0.0150677
10494781	NM_207205	Igsf3	immunoglobulin superfamily	938.251	451.03	90.4614	23.8479	2.08024	0.00104818	0.00544556
10521498	NM_007765	Crmp1	collapsin response mediator protein 1	2339.15	1126.3	271.828	87.0308	2.07684	0.00163693	0.00700558
10462140	NM_028785	Dock8	dedicator of cytokinesis 8	228.797	110.2	16.2677	9.20775	2.0762	7.67755e-05	0.00127552
10370334	NM_145152	Lrrc3	leucine rich repeat containing 3	727.114	350.436	88.2522	67.8446	2.07489	0.00066384	0.00419812
10459089	NM_008306	Ndst1	N-deacetylase	1569.16	756.477	142.013	97.3521	2.07429	0.000162042	0.00192014
10381588	NM_008175	Grn	granulin	1847.48	891.116	255.343	144.993	2.07322	0.0015419	0.00675814
10500720	NM_001039371	Slc22a15	solute carrier family 22 (organic anion	441.033	212.736	63.5964	17.2182	2.07315	0.00390937	0.0117732
10565962	NM_008773	P2ry2	purinergic receptor P2Y	532.554	256.995	130.233	68.371	2.07223	0.0159262	0.028502
10376868	NM_011706	Trpv2	transient receptor potential cation channel	2299.18	1109.91	299.361	272.136	2.07151	0.00110778	0.00560871
10588505	NM_029631	Abhd14b	abhydrolase domain containing 14b	321.211	155.25	62.3371	19.7973	2.06898	0.00937193	0.0201371
10587299	NM_019987	Ick	intestinal cell kinase	656.955	317.736	22.7885	37.055	2.06761	2.01486e-05	0.000671662
10448312	NM_020293	Cldn9	claudin 9	220.702	106.744	49.7486	11.968	2.06759	0.0166703	0.0293805
10582310	NM_138656	Mvd	mevalonate (diphospho) decarboxylase	863.925	417.889	207.028	44.4537	2.06736	0.0204875	0.0335396
10439068	NM_145932	Osta	organic solute transporter alpha	103.402	50.027	8.63361	4.51806	2.06693	0.000197994	0.00214811
10454881	BC028765	0610010O12Rik	RIKEN cDNA 0610010O12 gene	3898.59	1887.25	271.736	110.366	2.06575	0.000173267	0.00198284
10417124	BC096543	B930095G15Rik	RIKEN cDNA B930095G15 gene	1060.38	513.707	246.532	83.0271	2.06418	0.0163368	0.0289946
10571705	NM_008391	Irf2	interferon regulatory factor 2	973.3	471.723	155.423	43.7687	2.06329	0.00538814	0.0141995
10568873	NM_007403	Adam8	a disintegrin and metallopeptidase domain 8	247.231	119.84	46.3525	8.25431	2.06301	0.0105383	0.0217
10493052	NM_011832	Insrr	insulin receptor-related receptor	137.32	66.6495	32.5309	8.76486	2.06033	0.018859	0.0318923
10436849	NM_010508	Ifnar1	interferon (alpha and beta) receptor 1	1387.29	673.448	138.824	92.7899	2.05998	0.000286504	0.00258752
10346255	NM_145517	Ormdl1	ORM1-like 1 (S. cerevisiae)	262.308	127.419	28.1721	26.9812	2.05862	0.000455813	0.00337576
10414315	NM_028222	Cdkn3	cyclin-dependent kinase inhibitor 3	153.591	74.6312	50.5245	10.6931	2.05801	0.0492389	0.0615136
10514590	NM_026082	Dock7	dedicator of cytokinesis 7	2014	978.75	212.915	137.032	2.05772	0.000396517	0.00309291
10396402	NM_008856	Prkch	protein kinase C	218.642	106.283	38.5117	33.5404	2.05717	0.00477505	0.0132045
10391286	NM_001113563	Stat5b	signal transducer and activator of transcription 5B	670.393	325.935	83.8888	50.9757	2.05683	0.000944199	0.0050988
10453629	NM_001081963	9430020K01Rik	RIKEN cDNA 9430020K01 gene	453.036	220.282	41.4503	27.6115	2.05662	0.000186205	0.00206856
10507500	NM_008135	Slc6a9	solute carrier family 6 (neurotransmitter transporter	337.28	164.003	59.2731	36.6296	2.05655	0.00419909	0.0122741
10503876	NM_177774	Srsf13b	serine	736.072	357.924	182.134	32.3966	2.0565	0.0235078	0.0367348
10375358	ENSMUST00000081265	Ebf1	early B-cell factor 1	556.519	270.98	29.402	48.3489	2.05373	0.000172838	0.00198336
10377431	NM_009497	Vamp2	vesicle-associated membrane protein 2	6862.31	3344.41	375.462	431.671	2.05187	2.02482e-05	0.000666999
10526897	NM_024451	Sun1	Sad1 and UNC84 domain containing 1	889.244	433.65	73.9227	61.6798	2.0506	9.53607e-05	0.00143858
10469110	NM_181399	Usp6nl	USP6 N-terminal like	997.677	486.546	92.2142	100.056	2.05053	0.000296974	0.00263647
10338277	---			546.458	266.661	291.801	41.2712	2.04926	0.150263	0.134559
10601854	NM_011712	Wbp5	WW domain binding protein 5	1258.07	613.931	95.2625	66.3012	2.04921	6.7411e-05	0.00120055
10466087	NM_134142	Tmem109	transmembrane protein 109	1714.59	836.806	167.56	94.8075	2.04897	0.000349202	0.00289408
10607089	NM_207625	Acsl4	acyl-CoA synthetase long-chain family member 4	2938.74	1434.79	204.638	130.864	2.0482	5.31501e-05	0.00104819
10544406	NM_029528	Fam131b	family with sequence similarity 131	1934.03	944.461	420.162	230.849	2.04777	0.0105609	0.0217251
10500345	NR_001579	Terc	telomerase RNA component	328.294	160.336	65.9948	8.75187	2.04754	0.0138053	0.025795
10478409	NM_001039390	Pkig	protein kinase inhibitor	299.619	146.467	41.2957	19.0866	2.04564	0.00207683	0.00803234
10360664	ENSMUST00000136521	6330403A02Rik	RIKEN cDNA 6330403A02 gene	123.851	60.6395	27.5629	4.50491	2.04242	0.0180217	0.0309717
10565193	NM_013886	Hdgfrp3	hepatoma-derived growth factor	633.313	310.145	11.55	30.0371	2.04199	4.68132e-05	0.000984804
10504905	NM_178756	E130309F12Rik	RIKEN cDNA E130309F12 gene	234.845	115.025	22.7427	11.1768	2.04169	0.000451551	0.00336208
10368886	ENSMUST00000105502	Foxo3	forkhead box O3	1662.07	814.354	134.529	136.106	2.04096	0.000115124	0.00159758
10441003	NM_001111023	Runx1	runt related transcription factor 1	2829.79	1388.43	473.109	126.85	2.03812	0.00666192	0.0161409
10595059	NM_198962	Hcrtr2	hypocretin (orexin) receptor 2	485.995	238.531	43.5598	109.201	2.03745	0.0140961	0.0261281
10474181	NM_178890	Abtb2	ankyrin repeat and BTB (POZ) domain containing 2	1250.53	614.64	17.0801	81.0755	2.03458	0.000371565	0.00299042
10526997	---			204.294	100.468	24.1444	17.5165	2.03342	0.000646988	0.00415445
10381548	NM_153544	BC030867	cDNA sequence BC030867	152.378	74.9381	25.9082	7.95083	2.03339	0.00656002	0.0159541
10534120	NM_133768	Asl	argininosuccinate lyase	551.696	271.351	62.4936	15.6942	2.03315	0.00199205	0.00785351
10580957	NM_172758	Slc38a7	solute carrier family 38	1245.26	612.948	225.353	103.947	2.03159	0.00605697	0.0152547
10356626	---			1238.53	609.724	218.952	113.483	2.03129	0.00505839	0.0136757
10525932	NM_175432	Tmem132c	transmembrane protein 132C	495.452	244.212	147.059	47.6272	2.02878	0.0362043	0.0494686
10462363	NM_008413	Jak2	Janus kinase 2	725.334	358.089	280.358	78.6978	2.02557	0.0746792	0.0826209
10534152	NM_145218	Wbscr17	Williams-Beuren syndrome chromosome region 17 homolog (human)	2144.92	1058.95	190.704	108.033	2.02552	0.000238456	0.00234913
10388880	NM_133706	Tmem97	transmembrane protein 97	370.009	182.738	87.2463	35.0063	2.02481	0.0168216	0.0295537
10486197	NM_145530	Rhov	ras homolog gene family	557	275.42	61.4415	49.6652	2.02237	0.000464326	0.00341459
10430201	NM_022410	Myh9	myosin	1829.95	904.973	187.69	87.9403	2.02211	0.000651715	0.00416559
10494227	NM_029789	Lass2	LAG1 homolog	2729.15	1349.79	270.066	268.069	2.0219	0.000349987	0.00289484
10385557	NM_212484	Cnot6	CCR4-NOT transcription complex	851.489	421.221	225.949	94.4597	2.02148	0.024411	0.0376741
10362811	NM_001162908	Sesn1	sestrin 1	910.606	450.567	113.861	88.7498	2.02102	0.000878639	0.00491638
10589350	NM_025858	Shisa5	shisa homolog 5 (Xenopus laevis)	1565.66	775.184	215.894	154.352	2.01973	0.00142961	0.00645218
10473024	NM_172666	Agps	alkylglycerone phosphate synthase	578.262	286.416	40.4074	52.6362	2.01896	0.000170381	0.00196597
10583291	BC055786	2200002K05Rik	RIKEN cDNA 2200002K05 gene	3290.21	1630.03	328.422	128.358	2.0185	0.000804058	0.00466789
10404051	NM_175654	Hist1h4d	histone cluster 1	5943.55	2952.15	1080.31	375.769	2.0133	0.00780185	0.0179352
10606315	NM_001167988	Taf9b	TAF9B RNA polymerase II	4382.19	2176.99	621.754	170.529	2.01296	0.0040318	0.0119396
10474700	NM_011580	Thbs1	thrombospondin 1	226.346	112.501	134.761	17.9616	2.01194	0.189442	0.15785
10551169	NM_146184	B3gnt8	UDP-GlcNAc:betaGal beta-1	472.595	235.104	84.0382	13.5798	2.01015	0.00991196	0.0208944
10542310	NM_009875	Cdkn1b	cyclin-dependent kinase inhibitor 1B	1979.67	984.972	432.767	166.927	2.00987	0.0136732	0.0256054
10464560	NM_026316	Aldh3b1	aldehyde dehydrogenase 3 family	457.162	227.519	65.0891	27.2196	2.00934	0.00282874	0.00974085
10593270	NM_172770	Ttc12	tetratricopeptide repeat domain 12	416.081	207.141	44.0987	28.5793	2.00868	0.000444855	0.00334201
10395780	NM_021529	Ppp2r3c	protein phosphatase 2	3237.11	1613.34	426.78	221.396	2.00646	0.0016142	0.00695822
10594802	NM_172772	Fam63b	family with sequence similarity 63	698.885	348.387	94.1862	83.6532	2.00606	0.0014936	0.00664406
10596704	NM_008138	Gnai2	guanine nucleotide binding protein (G protein)	4694.32	2342.13	428.625	111.055	2.00429	0.00100062	0.00527392
10383289	NM_130862	Baiap2	brain-specific angiogenesis inhibitor 1-associated protein 2	370.389	184.808	37.8674	21.0914	2.00418	0.000485243	0.0034976
10516994	NM_145553	Fam76a	family with sequence similarity 76	496.921	247.981	19.3729	37.4334	2.00387	0.000147802	0.00183741
10404836	NM_183204	Rnf182	ring finger protein 182	276.88	138.195	20.7919	21.2516	2.00354	8.6172e-05	0.00134853
10511739	NM_027769	Cpne3	copine III	4623.84	2309.14	578.961	247.656	2.00241	0.00171632	0.00723053
10379511	NM_011333	Ccl2	chemokine (C-C motif) ligand 2	889.027	444.532	322.008	164.562	1.99992	0.0632615	0.0733194
10365469	NM_001163614	Ascl4	achaete-scute complex homolog 4 (Drosophila)	317.098	158.67	139.191	30.3122	1.99847	0.10487	0.104857
10452793	NM_027864	Galnt14	UDP-N-acetyl-alpha-D-galactosamine:polypeptide N-acetylgalactosaminyltransferase 14	1726.9	864.842	113.77	135.706	1.99678	8.08244e-05	0.00131069
10579872	NM_009412	Tpd52	tumor protein D52	2788.95	1397.03	136.142	95.7013	1.99634	7.56482e-06	0.000421042
10499080	NM_001081093	Arfip1	ADP-ribosylation factor interacting protein 1	419.931	210.535	48.3072	39.4521	1.99459	0.000623896	0.00408466
10482868	NM_028118	Wdsub1	WD repeat	689.28	345.661	120.488	52.0575	1.99409	0.00600902	0.0151705
10591988	NM_001024139	Adamts15	a disintegrin-like and metallopeptidase (reprolysin type) with thrombospondin type 1 motif	244.616	122.701	50.7465	22.074	1.9936	0.0110322	0.0223156
10602704	NM_173780	Klf8	Kruppel-like factor 8	605.074	303.634	59.8551	40.6287	1.99278	0.000311295	0.00272025
10482448	NM_015753	Zeb2	zinc finger E-box binding homeobox 2	1336.22	670.921	313.287	165.207	1.99162	0.0156991	0.0282774
10361191	NM_181546	Syt14	synaptotagmin XIV	698.714	351.038	80.8046	59.4432	1.99042	0.000641693	0.00414915
10535739	NM_011669	Usp12	ubiquitin specific peptidase 12	910.632	457.781	54.9266	61.6712	1.98923	3.72969e-05	0.000882731
10493555	NM_080466	Kcnn3	potassium intermediate	222.158	111.804	11.0611	16.7678	1.98703	8.5824e-05	0.00134732
10343922	---			337.623	169.968	55.5907	44.6373	1.98639	0.00373661	0.0114848
10402136	NM_175493	Gpr68	G protein-coupled receptor 68	182.757	92.0415	19.38	21.1654	1.98559	0.000754053	0.00450598
10478936	---			618.467	312.157	42.8829	70.4998	1.98127	0.000727865	0.00440942
10380761	NM_138657	Socs7	suppressor of cytokine signaling 7	883.433	446.15	38.7818	15.6328	1.98012	3.40852e-05	0.000842815
10585068	BC094249	Fam55d	family with sequence similarity 55	451.241	227.914	87.0887	28.4863	1.97987	0.0104136	0.0215494
10456046	NM_001146268	Pdgfrb	platelet derived growth factor receptor	487.912	246.484	64.3749	52.0587	1.97949	0.00130022	0.00612292
10373577	NM_024180	Ormdl2	ORM1-like 2 (S. cerevisiae)	358.166	181.126	39.5711	12.9839	1.97744	0.00157907	0.00686344
10603627	NM_029510	Bcor	BCL6 interacting corepressor	200.547	101.423	37.2617	7.78896	1.97734	0.0111402	0.0223984
10373542	NM_016811	Dgka	diacylglycerol kinase	1231.53	623.454	156.65	51.7135	1.97533	0.00257088	0.00922955
10553501	NM_080853	Slc17a6	solute carrier family 17 (sodium-dependent inorganic phosphate cotransporter)	4457.48	2256.59	357.93	344.067	1.97532	0.000115558	0.0015983
10538299	NM_010452	Hoxa3	homeobox A3	206.934	104.858	40.8904	14.7752	1.97347	0.0107686	0.0219899
10564290	NM_021366	Klf13	Kruppel-like factor 13	910.672	461.654	81.6478	37.7756	1.97263	0.000426808	0.00325919
10374464	BC040462	Spred2	sprouty-related	1287.19	653.4	218.801	96.371	1.96998	0.00558818	0.0145206
10488693	NM_198617	Tspyl3	TSPY-like 3	176.368	89.6139	12.8009	20.3212	1.96809	0.000755444	0.00450784
10495623	ENSMUST00000066215	Gm9916	predicted gene 9916	549.995	279.601	242.722	26.8239	1.96707	0.11149	0.109292
10432152	NM_146281	Olfr284	olfactory receptor 284	135.314	68.802	26.0372	3.64755	1.96672	0.0135683	0.0254603
10361926	NM_008580	Map3k5	mitogen-activated protein kinase kinase kinase 5	833.873	424.184	58.8146	89.7487	1.96583	0.00052479	0.00369032
10415411	NM_001040072	Nynrin	NYN domain and retroviral integrase containing	219.602	111.756	25.5498	20.8282	1.96502	0.000715264	0.00437432
10445373	ENSMUST00000097319	B230354K17Rik	RIKEN cDNA B230354K17 gene	348.57	177.585	34.9008	26.5278	1.96284	0.00032721	0.00278362
10474361	NM_029837	Mpped2	metallophosphoesterase domain containing 2	2728.84	1392.79	382.17	160.084	1.95925	0.00292171	0.00994214
10478928	NM_080455	Tshz2	teashirt zinc finger family member 2	2623.28	1339.16	303.497	56.4252	1.9589	0.00282293	0.00973286
10597493	NM_024222	Stt3b	STT3	3965.44	2025.82	270.825	267.583	1.95744	5.20913e-05	0.00103383
10604333	NM_178739	Dcaf12l1	DDB1 and CUL4 associated factor 12-like 1	465.991	238.155	21.5064	24.2273	1.95667	9.02022e-06	0.000462289
10575291	NM_029468	Zfp821	zinc finger protein 821	453.373	231.829	16.2867	57.2785	1.95563	0.00295704	0.0100134
10528090	NM_198620	Rundc3b	RUN domain containing 3B	856.413	437.985	82.9346	66.1484	1.95535	0.000278917	0.0025549
10548069	NM_207210	Dyrk4	dual-specificity tyrosine-(Y)-phosphorylation regulated kinase 4	101.585	51.9808	17.6422	3.83242	1.95427	0.00932558	0.0201203
10525989	NM_001081342	Gpr133	G protein-coupled receptor 133	466.934	239.125	44.5763	90.9421	1.95268	0.00885591	0.0195255
10586079	NM_176922	Itga11	integrin alpha 11	176.106	90.1899	69.4696	5.72794	1.95261	0.089316	0.0937016
10441091	AK078339	6530402D11Rik	RIKEN cDNA 6530402D11 gene	156.148	79.975	37.0252	11.8646	1.95246	0.0209899	0.0341279
10599207	NM_001085497	Slc25a43	solute carrier family 25	458.46	234.985	49.0868	28.6068	1.95102	0.000625874	0.0040912
10430669	NM_013762	Rpl3	ribosomal protein L3	7980.76	4091.45	337.01	781.177	1.95059	0.000724083	0.00440247
10433331	NM_025839	Nudt16l1	nudix (nucleoside diphosphate linked moiety X)-type motif 16-like 1	736.713	377.833	115.927	59.805	1.94984	0.00377003	0.0115239
10513884	NM_011599	Tle1	transducin-like enhancer of split 1	807.585	414.31	87.1864	36.4773	1.94923	0.00111557	0.00563794
10549276	NM_024469	Bhlhe41	basic helix-loop-helix family	1089.85	559.275	168.923	226.422	1.94869	0.0108989	0.0221261
10573747	NM_007406	Adcy7	adenylate cyclase 7	333.88	171.356	12.2063	35.5613	1.94846	0.00139073	0.00635219
10499216	NM_028460	Pear1	platelet endothelial aggregation receptor 1	239.214	122.881	38.5678	19.5906	1.94672	0.0042378	0.012344
10522503	NM_011058	Pdgfra	platelet derived growth factor receptor	172.636	88.7203	23.3839	15.0228	1.94585	0.00165576	0.00705724
10458794	NM_001160399	Ccdc112	coiled-coil domain containing 112	365.554	187.938	68.5716	19.882	1.94508	0.0107075	0.0219188
10545479	NM_025284	Tmsb10	thymosin	5267.32	2708.88	714.944	449.931	1.94447	0.00170363	0.00719886
10366310	NM_175489	Osbpl8	oxysterol binding protein-like 8	1416.6	729.079	193.363	106.961	1.943	0.001986	0.00784448
10602255	NM_001033795	Zcchc16	zinc finger	130.797	67.3634	16.1801	6.90449	1.94166	0.00185552	0.00756515
10544913	NM_009953	Crhr2	corticotropin releasing hormone receptor 2	282.838	145.847	31.5913	17.6011	1.93928	0.000833732	0.00475751
10434668	NM_133706	Tmem97	transmembrane protein 97	946.889	488.307	109.588	90.2899	1.93913	0.000753068	0.00450977
10503259	NM_021897	Trp53inp1	transformation related protein 53 inducible nuclear protein 1	975.424	503.09	127.755	86.5522	1.93886	0.0013937	0.00635532
10595159	NM_026480	Ooep	oocyte expressed protein homolog (dog)	340.375	175.6	33.3854	30.2407	1.93836	0.00034807	0.00289043
10463704	NM_020577	As3mt	arsenic (+3 oxidation state) methyltransferase	365.381	188.642	35.3831	60.2299	1.9369	0.0042461	0.0123466
10364841	NM_027829	Izumo4	IZUMO family member 4	501.81	259.087	20.2357	27.5965	1.93684	1.52556e-05	0.000586313
10372005	NM_172538	Vezt	vezatin	842.018	434.834	83.2722	52.7751	1.93641	0.000394637	0.003084
10490826	NM_177660	Zbtb10	zinc finger and BTB domain containing 10	614.138	317.162	93.6569	95.2235	1.93636	0.00434611	0.0125198
10474411	NM_011699	Lin7c	lin-7 homolog C (C. elegans)	2284.55	1180.1	270.721	242.555	1.93589	0.000942757	0.0050943
10570513	NM_029116	Kbtbd11	kelch repeat and BTB (POZ) domain containing 11	504.043	260.403	80.0698	22.0622	1.93563	0.00659175	0.0160173
10530772	NM_019515	Nmu	neuromedin U	101.708	52.5535	11.9999	5.56664	1.93531	0.00139537	0.00635946
10520043	NM_029990	Lhfpl3	lipoma HMGIC fusion partner-like 3	1537.12	794.87	161.894	142.073	1.9338	0.000494979	0.00354332
10389047	NM_001034013	Accn1	amiloride-sensitive cation channel 1	1689.54	873.718	67.5575	22.0429	1.93373	4.59585e-05	0.000985344
10400748	NM_183294	Cdkl1	cyclin-dependent kinase-like 1 (CDC2-related kinase)	224.222	116.098	4.50961	21.3854	1.93131	0.00151909	0.00670745
10531370	NM_025972	Naaa	N-acylethanolamine acid amidase	3001.86	1554.76	295.397	177.046	1.93075	0.000427489	0.00325546
10345230	NM_008999	Rab23	RAB23	470.215	243.543	52.4767	46.1592	1.93072	0.00068087	0.00424794
10482766	NM_023396	Rprm	reprimo	806.653	418.17	154.416	175.105	1.92901	0.016217	0.0288679
10415857	NM_177628	Fam167a	family with sequence similarity 167	182.265	94.5685	28.2396	2.777	1.92734	0.00805977	0.0183414
10402117	NM_153587	Rps6ka5	ribosomal protein S6 kinase	570.772	296.157	142.336	63.6487	1.92726	0.0229281	0.0360583
10595953	NM_177775	Esyt3	extended synaptotagmin-like protein 3	242.051	125.652	9.15561	15.0043	1.92637	4.62374e-05	0.000984579
10583834	NM_028390	Anln	anillin	397.389	206.382	76.0222	26.9374	1.92551	0.010657	0.0218475
10439854	NM_027444	Bbx	bobby sox homolog (Drosophila)	1026.52	533.243	142.132	100.872	1.92505	0.00184799	0.00754182
10536494	NM_016900	Cav2	caveolin 2	814.678	423.255	131.996	104.818	1.92479	0.00400873	0.0119305
10565152	NM_011983	Homer2	homer homolog 2 (Drosophila)	770.667	401.094	156.861	76.4234	1.92142	0.0111243	0.0223934
10583870	NM_028472	Bmper	BMP-binding endothelial regulator	227.972	118.661	34.3856	14.5627	1.92121	0.00410873	0.0121116
10519527	NM_011076	Abcb1a	ATP-binding cassette	141.862	73.8496	68.0168	13.0362	1.92096	0.137971	0.126968
10487359	NM_001163527	Itpripl1	inositol 1	315.078	164.101	55.1921	7.62402	1.92003	0.0111781	0.0224475
10398052	NR_033450	Serpina3h	serine (or cysteine) peptidase inhibitor	206.678	107.674	50.9573	19.73	1.91949	0.0234791	0.0367105
10464425	NM_018869	Grk5	G protein-coupled receptor kinase 5	584.615	304.707	39.3165	45.2768	1.91862	9.58681e-05	0.00144091
10380477	NM_172261	Ppp1r9b	protein phosphatase 1	1934.8	1008.98	127.623	164.063	1.91757	0.000154318	0.00187926
10461642	NR_028560	Scarna17	small Cajal body-specific RNA 17	1082.34	564.434	244.713	232.211	1.91757	0.0220068	0.0351923
10495993	NM_130450	Elovl6	ELOVL family member 6	3554.87	1854.13	297.236	258.025	1.91727	0.000147069	0.00183375
10401181	NM_021557	Rdh11	retinol dehydrogenase 11	989.462	516.209	167.865	181.309	1.91679	0.00875008	0.0193586
10512999	NR_033139	AI427809	expressed sequence AI427809	198.744	103.724	24.1078	9.3353	1.91609	0.00205213	0.00798113
10517508	NM_009777	C1qb	complement component 1	132.347	69.0732	21.9107	10.3625	1.91604	0.00532833	0.0141042
10393573	NM_011150	Lgals3bp	lectin	2326.37	1214.42	598.877	359.45	1.91562	0.0250344	0.0383457
10364030	NM_009630	Adora2a	adenosine A2a receptor	200.626	104.787	27.6269	15.7008	1.9146	0.00214439	0.0082213
10438262	NM_153150	Slc25a1	solute carrier family 25 (mitochondrial carrier	3662.14	1913.38	145.278	107.841	1.91396	2.70341e-06	0.000239955
10441456	NM_011523	Synj2	synaptojanin 2	433.72	226.878	43.9199	20.8786	1.91169	0.000764473	0.00453258
10349383	NM_028787	Slc35f5	solute carrier family 35	1371.13	717.237	128.285	178.317	1.91168	0.00141728	0.00641384
10490119	NM_001039560	Gcnt7	glucosaminyl (N-acetyl) transferase family member 7	162.245	84.8887	17.4478	21.1488	1.91126	0.00149617	0.00664134
10392347	NM_145823	Pitpnc1	phosphatidylinositol transfer protein	3667.42	1918.93	147.816	129.51	1.91118	2.37812e-06	0.000228535
10354677	NM_001081433	Ankrd44	ankyrin repeat domain 44	197.566	103.375	40.6809	16.5206	1.91116	0.0129981	0.0248196
10488709	NM_001134300	8430427H17Rik	RIKEN cDNA 8430427H17 gene	1047.05	547.889	67.9351	57.1344	1.91107	3.59666e-05	0.000866697
10407173	NM_010560	Il6st	interleukin 6 signal transducer	6119.54	3205.44	225.86	199.795	1.90911	1.43729e-06	0.000190949
10532753	NM_011779	Coro1c	coronin	2371.04	1242.06	380.519	120.156	1.90897	0.00660196	0.0160235
10401737	NM_001033475	Tmed8	transmembrane emp24 domain containing 8	1150.51	603.013	266.128	70.7249	1.90794	0.0222291	0.0353248
10551336	NM_010950	Numbl	numb-like	1562.34	818.883	290.285	118.242	1.90789	0.00918637	0.0199747
10467110	NM_001013770	Lipo1	lipase	446.375	233.991	43.2669	60.7732	1.90766	0.00178736	0.00739921
10453456	NM_199251	Kcnk12	potassium channel	870.36	456.883	149.299	74.3856	1.90499	0.00600042	0.015158
10481092	NM_026212	Agpat2	1-acylglycerol-3-phosphate O-acyltransferase 2 (lysophosphatidic acid acyltransferase	180.332	94.709	11.0923	8.19609	1.90406	3.03193e-05	0.000801032
10415806	---			485.719	255.381	56.197	4.91878	1.90194	0.00363078	0.0112967
10555470	NM_001040111	Arap1	ArfGAP with RhoGAP domain	346.996	182.586	56.7292	24.2552	1.90045	0.00571586	0.0146788
10542791	NM_001170433	Ppfibp1	PTPRF interacting protein	575.924	303.308	79.6854	55.5258	1.89881	0.00198459	0.0078426
10476759	NM_028724	Rin2	Ras and Rab interactor 2	600.191	316.503	112.715	53.022	1.89632	0.00892101	0.0196276
10453544	NM_176917	Mettl4	methyltransferase like 4	1289.56	680.088	243.28	110.335	1.89616	0.00927863	0.0200865
10491732	NM_183221	Fat4	FAT tumor suppressor homolog 4 (Drosophila)	294.044	155.164	61.4292	43.5297	1.89506	0.0123115	0.0239132
10365658	NM_029166	Uhrf1bp1l	UHRF1 (ICBP90) binding protein 1-like	2343.26	1237.48	244.707	125.904	1.89358	0.000793174	0.00464018
10372497	NM_025780	Thap2	THAP domain containing	225.225	118.977	59.3499	21.5285	1.89302	0.0307486	0.0442352
10434577	NM_001081366	Vps8	vacuolar protein sorting 8 homolog (S. cerevisiae)	838.142	443.442	20.8657	62.137	1.89008	0.00044158	0.00332939
10385428	NM_010583	Itk	IL2-inducible T-cell kinase	207.133	109.675	39.1028	13.6143	1.88861	0.011049	0.022317
10417048	NM_015820	Hs6st3	heparan sulfate 6-O-sulfotransferase 3	753.624	399.371	51.2258	37.1216	1.88703	5.60614e-05	0.00108486
10585703	NM_133982	Rpp25	ribonuclease P 25 subunit (human)	459.263	243.479	73.5495	34.904	1.88625	0.00500326	0.0136014
10586591	NM_178396	Car12	carbonic anyhydrase 12	106.702	56.5906	56.4114	3.29696	1.88551	0.173607	0.148857
10558971	NM_007459	Ap2a2	adaptor protein complex AP-2	4597.08	2441.01	168.947	42.5802	1.88327	6.11638e-05	0.00113362
10459927	NM_001190373	Kcng2	potassium voltage-gated channel	796.757	423.258	275.423	46.8807	1.88244	0.0710465	0.0796674
10478447	NM_021420	Stk4	serine	882.211	469.016	29.0145	73.5516	1.88098	0.000531269	0.00371399
10532937	NM_175352	Unc119b	unc-119 homolog B (C. elegans)	537.804	286.296	17.8735	35.5667	1.87849	0.000122219	0.00165213
10465379	NM_026912	Snx15	sorting nexin 15	1128.49	600.852	251.426	85.2114	1.87815	0.0193579	0.0324275
10547858	NM_013530	Gnb3	guanine nucleotide binding protein (G protein)	260.199	138.564	24.9509	18.9675	1.87783	0.000335706	0.00283282
10364814	NM_019575	Scamp4	secretory carrier membrane protein 4	857.618	456.746	273.296	130.395	1.87767	0.0530516	0.0647186
10355117	NM_001081658	Dytn	dystrotelin	144.119	76.7871	9.43587	8.95814	1.87686	4.84126e-05	0.000988591
10596931	NM_031392	Wdr6	WD repeat domain 6	897.54	479.133	189.061	118.603	1.87326	0.0130866	0.0249316
10453636	NM_153153	Svil	supervillin	232.145	124.01	53.0204	6.47104	1.87199	0.0256623	0.0389575
10590968	NM_019683	Ankrd49	ankyrin repeat domain 49	608.116	325.305	46.9084	80.9031	1.86937	0.00203404	0.00794035
10408767	NM_134060	Slc35b3	solute carrier family 35	350.63	187.589	113.597	45.9046	1.86914	0.0569841	0.0680551
10530827	NM_183284	Spink2	serine peptidase inhibitor	160.402	85.8388	34.3342	3.08947	1.86865	0.0220372	0.035214
10507099	NM_001085549	Gm12824	predicted gene 12824	100.879	53.993	17.2498	3.59044	1.86837	0.0104613	0.0216215
10588466	NM_011876	Twf2	twinfilin	544.581	291.5	83.6155	41.8622	1.8682	0.00423418	0.0123378
10554599	NM_001190374	Adamtsl3	ADAMTS-like 3	152.068	81.4379	29.8345	16.5132	1.86728	0.0103275	0.0214298
10436169	NM_028680	Ift57	intraflagellar transport 57 homolog (Chlamydomonas)	413.281	221.491	33.8908	59.0852	1.8659	0.00282283	0.00973656
10501229	NM_010358	Gstm1	glutathione S-transferase	1079.41	578.945	81.3509	104.083	1.86445	0.000358999	0.00293452
10604906	NM_010498	Ids	iduronate 2-sulfatase	5476.63	2938.12	598.038	249.727	1.86399	0.00141128	0.00639711
10581996	NM_029441	Cdyl2	chromodomain protein	523.166	280.703	65.9659	56.7388	1.86377	0.00152332	0.00671195
10578771	NM_144731	Galnt7	UDP-N-acetyl-alpha-D-galactosamine: polypeptide N-acetylgalactosaminyltransferase 7	172.411	92.5168	20.8647	8.66288	1.86356	0.0020998	0.00811365
10537657	NM_001146351	Ephb6	Eph receptor B6	416.672	223.632	66.5203	21.7556	1.8632	0.00694506	0.0165911
10420413	NM_015771	Lats2	large tumor suppressor 2	1023.12	549.49	149.88	43.5475	1.86195	0.0056592	0.0145962
10532819	NM_001159941	Kctd10	potassium channel tetramerisation domain containing 10	1880.71	1010.14	249.898	126.833	1.86182	0.00238184	0.00881607
10598138	NM_001030293	Spry3	sprouty homolog 3 (Drosophila)	1481.85	796.14	292.169	113.134	1.8613	0.0127314	0.0244446
10583732	NM_010700	Ldlr	low density lipoprotein receptor	3679.81	1977.22	543.596	245.981	1.86111	0.00407613	0.0120453
10382985	NM_027827	Afmid	arylformamidase	320.246	172.142	19.4847	15.3445	1.86035	3.04916e-05	0.000803776
10377938	NM_007933	Eno3	enolase 3	445.871	239.702	49.4268	28.5694	1.86011	0.000938588	0.00507834
10405535	BC051430	B230219D22Rik	RIKEN cDNA B230219D22 gene	2752.7	1480.08	162.724	151.487	1.85983	2.76139e-05	0.000781595
10396466	NR_030733	1700086L19Rik	RIKEN cDNA 1700086L19 gene	1902.92	1023.2	784.013	249.208	1.85978	0.106857	0.106108
10542993	NM_173006	Pon3	paraoxonase 3	107.311	57.7122	38.0277	3.55349	1.85942	0.0791537	0.0862238
10402554	NM_001079883	Bcl11b	B-cell leukemia	319.599	171.898	41.2198	19.4464	1.85923	0.0023185	0.00866224
10537123	NM_028886	Lrguk	leucine-rich repeats and guanylate kinase domain containing	105.532	56.8241	17.0372	3.00586	1.85716	0.00940303	0.0201676
10592067	NM_008026	Fli1	Friend leukemia integration 1	166.854	89.8591	13.0917	6.48437	1.85684	0.000279094	0.00255373
10452978	NR_003363	Gm6548	eukaryotic translation elongation factor 1 alpha 1 pseudogene	349.465	188.254	55.2756	40.4017	1.85635	0.00415121	0.0121681
10494857	NM_010937	Nras	neuroblastoma ras oncogene	1303.07	701.966	89.7202	85.2856	1.85631	6.94838e-05	0.0012172
10498576	NM_016753	Lxn	latexin	6410.95	3453.73	766.109	550.065	1.85624	0.001106	0.00560652
10527441	NM_023142	Arpc1b	actin related protein 2	5331.73	2873.87	775.43	293.43	1.85524	0.00460233	0.0129804
10394812	XR_106691	Gm4983	predicted gene 4983	1457.86	786.672	191.567	144.509	1.8532	0.0017671	0.00734444
10574976	NM_133792	Pla2g15	phospholipase A2	501.232	270.505	102.123	45.768	1.85295	0.0134515	0.025355
10580033	NM_011925	Cd97	CD97 antigen	321.133	173.473	55.9562	21.8929	1.8512	0.00850434	0.0189808
10453487	NM_013582	Lhcgr	luteinizing hormone	244.186	131.945	49.8855	35.8913	1.85066	0.0126392	0.0243403
10540072	NM_025800	Ppp1r2	protein phosphatase 1	6520.86	3527.62	493.283	494.108	1.84851	0.000138232	0.00176844
10561343	NM_028792	Josd1	Josephin domain containing 1	623.242	337.176	185.691	70.721	1.84842	0.0471107	0.0597213
10426042	NM_172611	Gramd4	GRAM domain containing 4	867.875	469.544	45.8442	96.2812	1.84834	0.00129077	0.0061025
10542335	NM_181444	Gprc5a	G protein-coupled receptor	101.797	55.0816	17.648	5.99525	1.84812	0.0091925	0.0199829
10432527	NM_028015	Lass5	LAG1 homolog	3337.07	1806.05	354.091	246.213	1.84771	0.000645489	0.0041544
10575052	NM_009864	Cdh1	cadherin 1	2649.3	1433.85	230.446	231.469	1.84769	0.000303127	0.00267405
10437687	NM_019980	Litaf	LPS-induced TN factor	644.221	348.732	89.0251	28.8631	1.84733	0.00445841	0.0127248
10543967	NM_001081206	Dgki	diacylglycerol kinase	2451.61	1327.17	259.384	24.2227	1.84724	0.0030584	0.0102404
10428302	NM_013692	Klf10	Kruppel-like factor 10	584.949	316.822	163.038	49.0031	1.8463	0.0408953	0.0539715
10352234	NM_001081175	Itpkb	inositol 1	2064.9	1118.8	238.174	167.824	1.84564	0.000968931	0.00518543
10457942	NM_009308	Syt4	synaptotagmin IV	4499.86	2438.45	216.53	180.183	1.84538	8.35104e-06	0.000441493
10400321	NM_134054	1110002B05Rik	RIKEN cDNA 1110002B05 gene	136.46	73.9704	20.7698	21.8726	1.8448	0.00608991	0.0152916
10434165	NM_033474	Arvcf	armadillo repeat gene deleted in velo-cardio-facial syndrome	677.667	367.514	84.0737	16.5328	1.84392	0.00421657	0.0123122
10603768	NM_028916	Efhc2	EF-hand domain (C-terminal) containing 2	158.99	86.2798	5.62307	23.9543	1.84273	0.00717047	0.0169454
10431371	NM_199198	Hdac10	histone deacetylase 10	346.997	188.332	23.8762	3.28021	1.84248	0.000783174	0.00460101
10371400	NM_007771	Cry1	cryptochrome 1 (photolyase-like)	293.927	159.533	68.579	13.4931	1.84242	0.0271646	0.0406254
10354220	NM_172499	Mfsd9	major facilitator superfamily domain containing 9	413.9	224.736	83.2389	52.9734	1.84171	0.0117969	0.023194
10389269	NM_019816	Aatf	apoptosis antagonizing transcription factor	449.156	243.933	26.4702	43.4453	1.84131	0.000493064	0.00353567
10533751	NM_011256	Pitpnm2	phosphatidylinositol transfer protein	2714.92	1474.72	88.7594	87.8296	1.84098	1.05724e-06	0.000173632
10506939	NM_007943	Eps15	epidermal growth factor receptor pathway substrate 15	3748.42	2037.78	190.918	199.415	1.83947	1.70868e-05	0.000607887
10566934	NM_053247	Lyve1	lymphatic vessel endothelial hyaluronan receptor 1	286.374	155.693	69.1215	12.2577	1.83934	0.0303917	0.0438501
10356461	NM_198652	Hjurp	Holliday junction recognition protein	640.293	348.25	154.103	89.6081	1.8386	0.0232527	0.0364589
10458323	NM_001167891	Nrg2	neuregulin 2	335.217	182.331	30.4018	17.1876	1.83851	0.000420614	0.0032296
10368635	NM_001081165	Fam26d	family with sequence similarity 26	203.941	110.928	96.9898	42.6995	1.83851	0.151934	0.135648
10346374	NM_009676	Aox1	aldehyde oxidase 1	1153.88	627.674	108.791	118.083	1.83834	0.000620149	0.0040665
10485115	AK155719	Dgkz	diacylglycerol kinase zeta	676.752	368.288	32.144	16.6647	1.83756	2.91045e-05	0.00078929
10371959	NM_013508	Elk3	ELK3	193.568	105.355	24.9482	7.36013	1.8373	0.00387331	0.0117195
10584142	NM_011808	Ets1	E26 avian leukemia oncogene 1	147.629	80.3513	11.6012	6.51132	1.83729	0.000224006	0.00227381
10563712	NM_001172588	Mrgpra2a	MAS-related GPR	198.116	107.888	37.2503	21.1836	1.83631	0.00936412	0.0201514
10471909	---			2866.28	1561.68	311.316	225.401	1.83538	0.000736316	0.00444129
10459138	NM_201353	Slc6a7	solute carrier family 6 (neurotransmitter transporter	174.983	95.3574	10.6325	12.6628	1.83503	8.55359e-05	0.00135022
10496262	NM_178877	Nhedc2	Na+	168.794	91.9968	37.3343	21.0128	1.83478	0.0173719	0.0301777
10483228	NM_018732	Scn3a	sodium channel	117.171	63.8705	41.7855	5.48655	1.83451	0.0826785	0.0891221
10351043	NR_028543	Snord47	small nucleolar RNA	120.199	65.5268	35.3462	19.1027	1.83435	0.0453823	0.0582192
10590452	NM_026179	Abhd5	abhydrolase domain containing 5	978.503	533.541	68.6423	76.2143	1.83398	0.000137204	0.00176068
10472097	NM_172409	Fmnl2	formin-like 2	991.122	540.467	128.724	152.62	1.83382	0.00433232	0.0125016
10441680	NM_011866	Pde10a	phosphodiesterase 10A	878.491	479.328	88.7663	54.5969	1.83276	0.000611492	0.00402871
10483679	NM_001190297	Gpr155	G protein-coupled receptor 155	2158.46	1178.72	291.826	103.611	1.83118	0.00397847	0.0119041
10459827	NM_001164504	Rnf165	ring finger protein 165	221.547	120.993	32.5648	9.92293	1.83107	0.00592343	0.01505
10562905	NM_030693	Atf5	activating transcription factor 5	466.1	254.579	75.9299	29.9803	1.83086	0.00700181	0.0166885
10564377	NM_146191	Lrrk1	leucine-rich repeat kinase 1	256.676	140.196	34.5675	8.43075	1.83083	0.00508303	0.0136979
10375360	NM_007897	Ebf1	early B-cell factor 1	4772.16	2607.73	719.732	234.241	1.83001	0.0061895	0.015435
10448416	NM_027008	Kctd5	potassium channel tetramerisation domain containing 5	831.874	454.59	98.8998	104.207	1.82995	0.00193187	0.00771826
10543226	NR_024619	2610001J05Rik	RIKEN cDNA 2610001J05 gene	473.205	258.6	99.4318	72.6512	1.82987	0.0150674	0.0274833
10438313	NM_033324	Dgcr8	DiGeorge syndrome critical region gene 8	473.147	258.569	81.0522	47.3463	1.82987	0.00650857	0.0158706
10389842	NM_001013375	Utp18	UTP18	317.3	173.427	40.95	54.9395	1.82958	0.00676691	0.016296
10374228	NM_001037928	Gm11992	predicted gene 11992	164.967	90.2305	23.571	22.5603	1.82828	0.00378422	0.0115461
10446537	NM_177278	L3mbtl4	l(3)mbt-like 4 (Drosophila)	137.919	75.441	37.1231	8.48159	1.82817	0.0401719	0.0533369
10461071	NM_175381	2700081O15Rik	RIKEN cDNA 2700081O15 gene	381.223	208.581	27.3126	14.8031	1.8277	0.000164794	0.001939
10475912	NM_028248	Tmem87b	transmembrane protein 87B	972.129	532.015	107.692	91.1869	1.82726	0.000870605	0.00489108
10587988	NM_177352	Gk5	glycerol kinase 5 (putative)	156.438	85.6136	29.3948	16.0752	1.82726	0.00970061	0.0205839
10471171	NM_001033389	Fubp3	far upstream element (FUSE) binding protein 3	835.843	457.852	69.5938	64.4201	1.82558	0.000213766	0.00223785
10458555	NM_011898	Spry4	sprouty homolog 4 (Drosophila)	891.635	488.79	195.456	65.4863	1.82417	0.0205534	0.0336079
10467003	NR_003650	Gm5972	protein phosphatase 1	4564.25	2503.07	567.744	355.446	1.82346	0.00160279	0.00693406
10563116	NM_013520	Flt3l	FMS-like tyrosine kinase 3 ligand	214.831	117.866	27.9785	17.0998	1.82266	0.00201396	0.00789517
10592154	NM_029762	Hyls1	hydrolethalus syndrome 1	218.482	119.892	38.24	39.4762	1.82232	0.0115563	0.0229097
10514083	NM_009887	Cer1	cerberus 1 homolog (Xenopus laevis)	141.132	77.453	9.2188	14.2192	1.82217	0.000582437	0.00392393
10360684	NM_010145	Ephx1	epoxide hydrolase 1	2903.89	1593.75	386.461	338.222	1.82205	0.00233365	0.00869548
10594636	NM_025800	Ppp1r2	protein phosphatase 1	4567.05	2507.92	120.355	170.377	1.82105	3.0638e-06	0.000266284
10501533	NM_001042711	Amy2a5	amylase 2a5	226.864	124.652	66.5861	49.186	1.81998	0.0519602	0.0637877
10436428	NM_025910	Mina	myc induced nuclear antigen	512.711	281.726	46.2952	90.7469	1.81989	0.00814849	0.0184628
10528015	NM_027399	Steap1	six transmembrane epithelial antigen of the prostate 1	159.778	87.799	49.1549	11.7291	1.81982	0.0574212	0.0684108
10501924	NM_031186	Ndst3	N-deacetylase	901.254	495.689	281.736	45.4981	1.81818	0.0617317	0.072006
10563421	NM_008172	Grin2d	glutamate receptor	161.641	88.9038	26.8078	15.2012	1.81815	0.005979	0.0151268
10502469	NM_019808	Pdlim5	PDZ and LIM domain 5	797.698	438.749	86.2503	90.2657	1.81812	0.00121287	0.00590808
10565255	NM_030728	9930013L23Rik	RIKEN cDNA 9930013L23 gene	146.757	80.7279	34.4371	5.4285	1.81792	0.0296449	0.0430777
10426891	NM_027334	Mettl7a1	methyltransferase like 7A1	1059.46	582.836	164.438	82.6315	1.81777	0.00499902	0.0135943
10526754	NM_021392	Ap4m1	adaptor-related protein complex AP-4	764.708	420.88	90.8174	130.698	1.81692	0.00648595	0.0158524
10535759	NM_080795	Lnx2	ligand of numb-protein X 2	454.696	250.355	41.2124	24.3031	1.8162	0.000415729	0.00320387
10489784	NM_177782	Prex1	phosphatidylinositol-3	460.8	253.723	46.5269	25.5171	1.81616	0.00076237	0.00453298
10561673	NM_182927	Spred3	sprouty-related	340.087	187.31	110.354	19.8071	1.81564	0.0674324	0.0767584
10424260	NM_145959	D15Ertd621e	DNA segment	1566.51	863.04	104.344	106.022	1.81511	7.96288e-05	0.00130133
10568135	NM_001102563	Prrt2	proline-rich transmembrane protein 2	1762.31	971.019	328.164	174.31	1.81491	0.0097943	0.0207091
10470564	NM_001145835	Ralgds	ral guanine nucleotide dissociation stimulator	941.842	519.226	135.485	96.4058	1.81393	0.00304052	0.0101969
10405464	NM_001038018	Grk6	G protein-coupled receptor kinase 6	638.715	352.141	157.862	48.0219	1.8138	0.0308622	0.0443375
10395805	BC049669	Fam177a	family with sequence similarity 177	8662.03	4778.96	1057.05	482.759	1.81254	0.00218793	0.00833849
10386723	NM_011841	Mapk7	mitogen-activated protein kinase 7	536.897	296.215	75.7888	18.3739	1.81252	0.00614205	0.0153625
10348739	NM_172463	Sned1	sushi	267.916	147.926	32.8558	10.2194	1.81115	0.0033376	0.0107116
10430593	NM_028792	Josd1	Josephin domain containing 1	353.236	195.147	27.796	9.86263	1.8101	0.000604636	0.00399931
10346551	NM_207653	Cflar	CASP8 and FADD-like apoptosis regulator	202.043	111.666	40.3422	29.7092	1.80936	0.0130218	0.0248536
10458349	NM_025291	Sra1	steroid receptor RNA activator 1	985.415	545.03	40.138	49.0979	1.808	1.18081e-05	0.000524347
10509039	NM_030189	4930555I21Rik	RIKEN cDNA 4930555I21 gene	503.154	278.409	72.2956	24.0573	1.80725	0.00545311	0.0142762
10462039	NM_001035244	Trpm3	transient receptor potential cation channel	772.809	427.695	134.229	123.934	1.80692	0.0093103	0.0201133
10367717	NM_145418	BC013529	cDNA sequence BC013529	314.426	174.097	74.205	55.127	1.80603	0.0253501	0.0386239
10512024	NM_178061	Mobkl2b	MOB1	451.038	249.787	20.9588	6.97203	1.80569	0.000101011	0.00149353
10547191	NM_178768	Tmem72	transmembrane protein 72	489.665	271.193	60.2272	41.7504	1.80559	0.00150871	0.0066828
10413047	NM_008873	Plau	plasminogen activator	193.154	106.997	17.9637	14.7875	1.80522	0.000368295	0.00297269
10569972	NM_026058	Lass4	LAG1 homolog	3031.14	1679.28	369.656	353.112	1.80502	0.0018615	0.00757475
10390175	NM_033217	Ngfr	nerve growth factor receptor (TNFR superfamily	5939.84	3291.08	1395.51	343.39	1.80483	0.0285189	0.041967
10599719	NM_172780	Slc9a6	solute carrier family 9 (sodium	4277.73	2371.39	163.716	236.757	1.80389	2.76385e-05	0.000781595
10599530	NM_011228	Rab33a	RAB33A	1782.62	988.313	268.61	139.031	1.8037	0.00451136	0.0128016
10598203	NM_020279	Ccl28	chemokine (C-C motif) ligand 28	102.31	56.7295	33.8505	8.43492	1.80346	0.0704841	0.0792176
10415678	NM_026908	Cab39l	calcium binding protein 39-like	2384.81	1322.99	215.551	246.243	1.80259	0.000682761	0.00425338
10501208	NM_008184	Gstm6	glutathione S-transferase	167.335	92.9064	49.3828	42.5587	1.80112	0.0634528	0.0734597
10457834	NM_199024	Nol4	nucleolar protein 4	251.871	139.951	22.5387	8.48741	1.79971	0.000909523	0.0049955
10436841	NM_008349	Il10rb	interleukin 10 receptor	2002.43	1112.9	225.837	179.411	1.79929	0.00100577	0.00528772
10511901	NM_001012450	Ankrd6	ankyrin repeat domain 6	659.699	366.668	32.2967	54.1594	1.79917	0.000271718	0.00252776
10354938	NM_001033449	Als2cr4	amyotrophic lateral sclerosis 2 (juvenile) chromosome region	436.298	242.529	17.5133	44.2829	1.79895	0.00135705	0.00628075
10590060	NM_133710	Ctdspl	CTD (carboxy-terminal domain	377.091	209.835	56.4865	22.8585	1.79708	0.00553635	0.0144218
10597377	NM_178624	Fbxl2	F-box and leucine-rich repeat protein 2	2593.09	1443.28	261.464	149.514	1.79666	0.000753094	0.0045067
10534585	NM_018825	Sh2b2	SH2B adaptor protein 2	232.928	129.693	24.4883	15.1845	1.796	0.000816329	0.00470643
10604763	NM_023142	Arpc1b	actin related protein 2	6050.33	3370.99	720.573	300.216	1.79482	0.00233457	0.00869505
10425302	NM_013818	Gtpbp1	GTP binding protein 1	774.812	431.712	66.4049	30.2704	1.79474	0.000565944	0.00385636
10474851	NM_001045523	Bahd1	bromo adjacent homology domain containing 1	552.343	307.863	70.8457	17.4784	1.79412	0.00468592	0.0131055
10406733	NM_028106	Zbed3	zinc finger	453.299	252.934	55.3669	24.0776	1.79217	0.00245867	0.00900471
10571815	NM_153581	Gpm6a	glycoprotein m6a	1165.75	650.748	107.995	156.037	1.79141	0.00234913	0.0087298
10576386	NM_133955	Rhou	ras homolog gene family	1173.48	655.288	139.604	50.5721	1.79079	0.00274265	0.00959869
10436392	NM_007757	Cpox	coproporphyrinogen oxidase	484.151	270.634	42.8686	56.2643	1.78895	0.00119716	0.00586918
10398996	NM_024223	Crip2	cysteine rich protein 2	5830.56	3259.84	752.038	489.291	1.7886	0.00204998	0.00797651
10438708	NM_008555	Masp1	mannan-binding lectin serine peptidase 1	361.436	202.185	69.248	17.965	1.78765	0.0161035	0.0287392
10514902	NM_029985	Lrrc42	leucine rich repeat containing 42	225.562	126.377	18.7679	29.8938	1.78483	0.0023961	0.00884533
10434869	NM_026202	Ccdc50	coiled-coil domain containing 50	1191.51	667.581	163.674	80.0974	1.78482	0.00347181	0.0109945
10370754	NR_036582	Dos	downstream of Stk11	705.046	395.066	153.535	43.0607	1.78463	0.0231404	0.0363169
10515399	NM_013807	Plk3	polo-like kinase 3 (Drosophila)	680.27	381.218	114.901	81.5443	1.78447	0.00682256	0.0163875
10446771	NM_001081071	Lclat1	lysocardiolipin acyltransferase 1	3630.44	2034.59	756.297	344.795	1.78436	0.0168878	0.0296201
10341354	---			172.921	96.9484	49.1894	45.2824	1.78363	0.0637364	0.0737369
10459084	NM_001109975	Synpo	synaptopodin	148.808	83.4371	31.078	9.70484	1.78347	0.0197969	0.0328729
10501199	NM_026672	Gstm7	glutathione S-transferase	594.819	333.598	122.353	48.6781	1.78304	0.0171822	0.0299666
10464251	NM_181415	Atrnl1	attractin like 1	3370.02	1890.95	172.793	141.576	1.78218	1.5338e-05	0.000586313
10350684	NM_026369	Arpc5	actin related protein 2	3829.46	2149.01	138.313	428.167	1.78196	0.00252644	0.00913673
10394735	NM_027959	Pdia6	protein disulfide isomerase associated 6	879.563	493.632	121.984	119.344	1.78182	0.00400976	0.0119251
10532630	NM_177078	Adrbk2	adrenergic receptor kinase	308.988	173.528	36.2863	37.2713	1.78063	0.00200317	0.00787878
10594800	NM_172772	Fam63b	family with sequence similarity 63	2772.27	1558.37	622.06	322.041	1.77895	0.0212463	0.0343643
10557628	NM_175163	Zfp689	zinc finger protein 689	363.361	204.38	16.0286	20.9141	1.77787	3.13132e-05	0.000809536
10496338	NM_008913	Ppp3ca	protein phosphatase 3	6438.69	3621.79	345.553	494.532	1.77776	0.000161506	0.00192471
10357064	NM_009190	Vps4b	vacuolar protein sorting 4b (yeast)	2208.37	1242.74	29.0673	117.22	1.77702	0.000270661	0.00253771
10376950	NM_008885	Pmp22	peripheral myelin protein 22	12342.1	6946.58	592.496	769.562	1.77671	4.83409e-05	0.000988966
10454441	NM_009308	Syt4	synaptotagmin IV	256.762	144.516	29.8467	17.7021	1.77671	0.0014419	0.00648661
10359339	NM_013862	Rabgap1l	RAB GTPase activating protein 1-like	1395.54	785.534	206.877	149.227	1.77655	0.00393779	0.0118204
10403508	---			107.998	60.8217	53.5184	33.6582	1.77566	0.195215	0.161276
10413086	NM_134079	Adk	adenosine kinase	2521.22	1419.95	70.9081	186	1.77558	0.000462687	0.00341155
10558707	NM_053194	Ric8	resistance to inhibitors of cholinesterase 8 homolog (C. elegans)	715.256	402.837	136.148	76.3437	1.77555	0.01158	0.0229404
10364072	NM_011820	Ggt5	gamma-glutamyltransferase 5	166.341	93.6995	68.12	6.79957	1.77525	0.122156	0.116282
10391540	NM_016695	Mpp2	membrane protein	331.327	186.654	56.5164	23.501	1.77508	0.00908164	0.0198452
10606910	NM_001082412	Mcart6	mitochondrial carrier triple repeat 6	1081.16	609.079	148.247	131.772	1.77508	0.00324214	0.0105389
10402409	NM_009247	Serpina1e	serine (or cysteine) peptidase inhibitor	203.17	114.565	27.8026	21.5768	1.7734	0.00281392	0.00972187
10385325	NM_013917	Pttg1	pituitary tumor-transforming gene 1	828.591	467.327	91.5314	33.0207	1.77304	0.00221409	0.00839988
10406423	NM_028372	Mblac2	metallo-beta-lactamase domain containing 2	1751.27	988.586	197.402	174.283	1.77149	0.00122244	0.00593739
10452571	NM_008984	Ptprm	protein tyrosine phosphatase	1083.67	611.933	111.635	32.046	1.7709	0.00218543	0.00833659
10469828	NM_177611	Psd4	pleckstrin and Sec7 domain containing 4	112.968	63.8059	15.7739	7.87855	1.77049	0.00378155	0.0115422
10547227	NM_001080780	Ret	ret proto-oncogene	7025.75	3969.47	175.066	199.091	1.76995	5.2077e-07	0.000120901
10509941	NM_001081174	6330545A04Rik	RIKEN cDNA 6330545A04 gene	177.088	100.065	23.3245	14.7101	1.76973	0.00244006	0.00894439
10368675	NM_008538	Marcks	myristoylated alanine rich protein kinase C substrate	1184.11	669.563	330.675	242.538	1.76848	0.0494865	0.0617215
10553042	NM_028544	Rasip1	Ras interacting protein 1	190.024	107.484	26.2696	8.92497	1.76793	0.0051792	0.0138455
10590918	NM_001081395	Amotl1	angiomotin-like 1	1064.92	602.56	64.1674	67.3421	1.76733	6.07629e-05	0.00113123
10440388	NR_027492	Hspa13	heat shock protein 70 family	982.635	556.055	70.1591	147.248	1.76715	0.00523203	0.0139287
10557033	ENSMUST00000047875	Eef2k	eukaryotic elongation factor-2 kinase	467.161	264.379	79.7565	57.6478	1.76701	0.00759106	0.0175764
10347910	NM_025386	Fbxo36	F-box protein 36	1335.36	755.917	94.9063	121.031	1.76654	0.000367206	0.00296677
10546432	NM_175314	Adamts9	a disintegrin-like and metallopeptidase (reprolysin type) with thrombospondin type 1 motif	281.942	159.616	105.407	43.9565	1.76638	0.0986223	0.100254
10380280	NM_001033266	Gm525	predicted gene 525	302.694	171.448	41.7739	34.2635	1.76552	0.00313529	0.0103691
10413008	NM_028428	Fut11	fucosyltransferase 11	998.005	565.318	52.8521	56.2899	1.76539	3.09555e-05	0.000809294
10483110	NM_027835	Ifih1	interferon induced with helicase C domain 1	223.335	126.585	78.7472	14.8485	1.76432	0.0889177	0.093448
10597648	NM_010851	Myd88	myeloid differentiation primary response gene 88	637.236	361.208	86.489	54.924	1.76418	0.00282783	0.00974174
10361887	NM_022032	Perp	PERP	212.959	120.777	33.5331	52.9669	1.76324	0.0316702	0.0450337
10439895	NM_009655	Alcam	activated leukocyte cell adhesion molecule	3644.84	2067.46	345.085	348.881	1.76296	0.000669711	0.0042161
10571036	NM_028000	Ppapdc1b	phosphatidic acid phosphatase type 2 domain containing 1B	997.429	566.584	55.3547	69.8241	1.76043	9.48438e-05	0.00143731
10566926	NM_025999	Rnf141	ring finger protein 141	1852.3	1052.42	33.8426	177.175	1.76004	0.0022821	0.00858381
10541049	NM_027920	March8	membrane-associated ring finger (C3HC4) 8	680.218	386.541	70.8861	33.8587	1.75976	0.00127758	0.00607104
10372003	NR_029764	Mir331	microRNA 331	219.006	124.464	19.894	28.4002	1.75959	0.00225236	0.00851025
10501164	NM_007778	Csf1	colony stimulating factor 1 (macrophage)	402.111	228.566	103.139	27.0781	1.75928	0.0393378	0.0525301
10506714	NR_033496	Lrp8	low density lipoprotein receptor-related protein 8	866.327	492.526	96.9485	29.1884	1.75895	0.00285568	0.0098013
10560655	NM_020486	Bcam	basal cell adhesion molecule	4425.9	2517.95	1377.88	347.313	1.75774	0.0657244	0.0753585
10604751	NM_010200	Fgf13	fibroblast growth factor 13	3103.71	1766.98	294.631	86.8002	1.75651	0.00168062	0.00712687
10349529	NM_172485	Thsd7b	thrombospondin	365.509	208.115	10.7799	35.3124	1.75628	0.00172488	0.00724467
10419296	NM_172598	Wdhd1	WD repeat and HMG-box DNA binding protein 1	286.217	163.077	41.2487	27.2423	1.75511	0.00374143	0.0114785
10567589	NM_001033173	Usp31	ubiquitin specific peptidase 31	1532.49	873.774	295.833	149.543	1.75387	0.0134252	0.0253341
10488195	NM_024281	Rrbp1	ribosome binding protein 1	545.703	311.202	32.979	44.9323	1.75353	0.000240323	0.00236195
10530536	NM_001113460	Tec	tec protein tyrosine kinase	164.236	93.6666	38.8363	17.6783	1.75341	0.0277104	0.041103
10533993	NM_133895	Slc15a4	solute carrier family 15	634.885	362.323	75.619	54.117	1.75226	0.00154105	0.00676151
10580782	NM_053246	Dok4	docking protein 4	2641.94	1508.41	706.295	239.518	1.75147	0.0428134	0.0557628
10494386	NM_178213	Hist2h2ab	histone cluster 2	225.458	128.731	26.8575	32.3739	1.75139	0.00402469	0.0119355
10580516	XM_003085369	Gm6625	predicted gene 6625	554.699	316.921	42.2041	53.6438	1.75028	0.000548203	0.00379113
10586118	NM_138304	Calml4	calmodulin-like 4	491.608	281.084	138.267	75.9634	1.74897	0.0477028	0.0602523
10583847	NM_178415	Bbs9	Bardet-Biedl syndrome 9 (human)	1249.97	714.7	190.511	77.6677	1.74895	0.00663373	0.0160772
10561527	NM_021895	Actn4	actinin alpha 4	3486.41	1993.84	198.968	94.4448	1.74859	0.000110879	0.00157264
10560868	NM_001033205	Zfp575	zinc finger protein 575	179.272	102.543	43.7573	18.4534	1.74826	0.031542	0.0449203
10443027	NM_029870	A930001N09Rik	RIKEN cDNA A930001N09 gene	1103.7	631.55	122.633	59.5615	1.7476	0.00167796	0.00711919
10472965	NM_008276	Hoxd8	homeobox D8	655.53	375.408	84.5276	58.6408	1.74618	0.00230415	0.00864342
10401616	NM_175337	Mlh3	mutL homolog 3 (E coli)	485.359	277.998	41.4823	70.9893	1.74591	0.00434198	0.0125165
10376326	NM_019440	Irgm2	immunity-related GTPase family M member 2	559.159	320.386	69.7246	99.8617	1.74527	0.00973022	0.0206363
10600144	NM_007978	F8a	factor 8-associated gene A	312.76	179.208	70.0441	52.0929	1.74523	0.0246064	0.0378776
10447569	NM_001111017	Serac1	serine active site containing 1	259.445	148.663	36.7114	10.9201	1.74519	0.00648138	0.0158552
10514000	NM_010820	Mpdz	multiple PDZ domain protein	718.289	411.605	102.423	54.9508	1.74509	0.00416819	0.0122094
10408359	NM_009513	Nrsn1	neurensin 1	2639.66	1512.8	228.829	194.788	1.74488	0.000327127	0.00278575
10367179	NM_001136082	Timeless	timeless homolog (Drosophila)	189.999	108.91	29.4138	33.0803	1.74455	0.0107888	0.0219989
10413398	NM_134437	Il17rd	interleukin 17 receptor D	264.68	151.777	30.4482	12.939	1.74387	0.00230426	0.00863996
10386219	NM_011758	Zfp39	zinc finger protein 39	239.556	137.395	27.3802	27.9805	1.74356	0.00198054	0.00783773
10457895	NM_001146292	Celf4	CUGBP	2305.86	1322.85	216.578	106.156	1.74311	0.000844545	0.00479302
10381474	NM_025404	Arl4d	ADP-ribosylation factor-like 4D	254.174	145.823	43.8225	15.2879	1.74303	0.0113296	0.0226104
10404578	NM_009881	Cdyl	chromodomain protein	122	69.9987	14.3035	3.79783	1.74288	0.00379908	0.011583
10508405	NM_025452	Tmem54	transmembrane protein 54	292.839	168.021	71.5721	54.0106	1.74287	0.0343742	0.0476776
10360589	NM_026375	Ahctf1	AT hook containing transcription factor 1	939.693	539.165	132.69	60.4862	1.74287	0.00465353	0.0130499
10577999	NM_153135	Unc5d	unc-5 homolog D (C. elegans)	219.677	126.064	27.9457	15.8683	1.74258	0.00249175	0.00908207
10432540	NM_001113545	Lima1	LIM domain and actin binding 1	302.196	173.469	48.6872	24.5969	1.74207	0.00709585	0.0168549
10507101	NM_001085549	Gm12824	predicted gene 12824	144.57	82.9906	19.9017	6.26861	1.742	0.00575654	0.0147606
10584615	NM_021424	Pvrl1	poliovirus receptor-related 1	947.193	543.771	83.2459	39.9388	1.7419	0.000668914	0.00421426
10546725	NM_018884	Pdzrn3	PDZ domain containing RING finger 3	229.321	131.725	45.6689	13.5508	1.7409	0.0192026	0.0323034
10402283	NM_172584	Itpk1	inositol 1	979.847	563.293	186.269	41.9887	1.7395	0.0181965	0.0311631
10354233	NM_001013025	Tgfbrap1	transforming growth factor	1063.98	611.7	190.734	86.4393	1.73938	0.0112911	0.0225605
10568282	NM_009746	Bcl7c	B-cell CLL	343.184	197.368	79.6281	23.1463	1.7388	0.0304283	0.0438878
10441864	NM_010806	Mllt4	myeloid	758.713	436.531	44.5418	66.1906	1.73805	0.000372184	0.00298677
10596347	NM_175025	Atp2c1	ATPase	3568.59	2053.47	174.473	212.777	1.73783	4.28622e-05	0.000945611
10574962	NM_010901	Nfatc3	nuclear factor of activated T-cells	1172.28	674.664	178.666	118.303	1.73757	0.00506615	0.0136745
10516551	NM_029036	S100pbp	S100P binding protein	653.931	376.89	109.809	63.8644	1.73507	0.00791204	0.0180939
10407709	NM_001081128	Mtr	5-methyltetrahydrofolate-homocysteine methyltransferase	527.386	304.574	50.9421	50.4143	1.73155	0.000799744	0.00465255
10554094	NM_010513	Igf1r	insulin-like growth factor I receptor	1573.6	908.9	175.283	48.2069	1.73133	0.00323397	0.0105246
10574149	NM_001033207	Nlrc5	NLR family	163.755	94.6378	32.6246	17.0489	1.73034	0.0158751	0.0284716
10495896	NM_001025439	Camk2d	calcium	3985.44	2304.11	238.884	262.317	1.72971	8.27072e-05	0.00133117
10428407	NM_175502	Tmem74	transmembrane protein 74	2355.66	1362.72	194.279	145.232	1.72865	0.00026463	0.00250081
10514221	NM_007408	Plin2	perilipin 2	1135.61	657.548	211.844	118.125	1.72704	0.0123548	0.023975
10457038	ENSMUST00000097503	Gm10524	predicted gene 10524	1167.59	677.335	251.486	185.125	1.72381	0.0224831	0.0355592
10504551	NM_027266	Rg9mtd3	RNA (guanine-9-) methyltransferase domain containing 3	652.359	378.495	12.7359	46.9964	1.72356	0.000783956	0.00459914
10479230	NM_028806	Phactr3	phosphatase and actin regulator 3	559.284	324.508	23.6852	52.2	1.72348	0.000994699	0.00526264
10519747	NM_011348	Sema3e	sema domain	328.703	190.77	34.6758	66.7966	1.72303	0.0174243	0.0302248
10476834	NM_011917	Xrn2	5'-3' exoribonuclease 2	591.584	343.438	111.79	81.9035	1.72253	0.0134789	0.0253895
10434758	NM_145933	St6gal1	beta galactoside alpha 2	1182.66	686.691	38.3045	73.2373	1.72226	0.000132781	0.0017305
10564704	NM_178255	Hapln3	hyaluronan and proteoglycan link protein 3	124.698	72.4409	44.1125	2.5291	1.72138	0.0983479	0.100036
10391103	NM_010593	Jup	junction plakoglobin	4252.46	2471.31	866.135	390.962	1.72073	0.0184964	0.0314638
10590983	NM_019482	Panx1	pannexin 1	1148.81	667.824	167.558	135.897	1.72023	0.00474466	0.0131859
10356406	NM_001111314	Ngef	neuronal guanine nucleotide exchange factor	203.268	118.234	33.5437	8.29029	1.7192	0.0122068	0.0237706
10455335	NM_138945	Pou4f3	POU domain	1071.73	623.532	125.112	83.1069	1.7188	0.0016332	0.00700038
10407370	NM_001113550	4833420G17Rik	RIKEN cDNA 4833420G17 gene	456.664	265.725	116.289	52.1673	1.71856	0.0381338	0.0514071
10584047	NM_013906	Adamts8	a disintegrin-like and metallopeptidase (reprolysin type) with thrombospondin type 1 motif	183.27	106.652	56.6407	11.7668	1.71839	0.0706498	0.0793078
10478401	NM_029512	Ttpal	tocopherol (alpha) transfer protein-like	951.739	553.974	52.3033	65.5019	1.71802	0.000103225	0.00152088
10350896	NM_007495	Astn1	astrotactin 1	2358.49	1373.09	37.2266	67.7228	1.71765	3.46747e-06	0.0002842
10582082	NM_001009950	Slc38a8	solute carrier family 38	149.978	87.3219	25.3884	14.0088	1.71753	0.00881231	0.0194602
10601846	NM_029823	2900062L11Rik	RIKEN cDNA 2900062L11 gene	350.295	203.991	53.8312	36.3029	1.71721	0.00562384	0.0145454
10433228	NM_029738	Cluap1	clusterin associated protein 1	469.584	273.876	80.1077	41.8807	1.71459	0.00939149	0.0201636
10368877	NM_001034858	Armc2	armadillo repeat containing 2	286.671	167.239	23.7965	17.5795	1.71414	0.000292685	0.00262068
10505270	NM_025286	Slc31a2	solute carrier family 31	1764.93	1030.22	336.216	123.624	1.71316	0.0164854	0.0291716
10599435	NM_177215	Ocrl	oculocerebrorenal syndrome of Lowe	2459.52	1435.96	281.003	109.293	1.7128	0.00272324	0.00956283
10485955	NM_009162	Scg5	secretogranin V	2320.71	1355.01	59.6686	114.9	1.71269	5.21413e-05	0.00103383
10380599	NM_172799	Ttll6	tubulin tyrosine ligase-like family	110.655	64.6373	25.7751	4.85594	1.71194	0.0351874	0.0484915
10380823	NM_010688	Lasp1	LIM and SH3 protein 1	1810.42	1057.54	249.663	109.838	1.71191	0.00482131	0.0133016
10565709	NM_001081167	B3gnt6	UDP-GlcNAc:betaGal beta-1	104.323	60.9658	7.84534	6.37867	1.71117	0.000171777	0.0019739
10572212	NM_198101	Gmip	Gem-interacting protein	181.786	106.24	31.0282	5.56158	1.7111	0.0149658	0.0273756
10595981	NM_008624	Mras	muscle and microspikes RAS	1898.52	1109.55	199.482	29.9989	1.71107	0.00370881	0.0114457
10595404	NM_001160378	Fam46a	family with sequence similarity 46	206.794	120.95	57.5413	10.4949	1.70975	0.0561084	0.0673753
10355214	NM_010497	Idh1	isocitrate dehydrogenase 1 (NADP+)	3607.63	2110.11	223.126	445.548	1.70969	0.00279328	0.00967455
10507520	NM_026601	Hyi	hydroxypyruvate isomerase homolog (E. coli)	740.726	433.45	60.7323	23.4907	1.70891	0.000814543	0.00470262
10549760	NM_026900	Zfp580	zinc finger protein 580	897.289	525.627	114.118	69.7861	1.70708	0.00264722	0.00939059
10594447	NM_008927	Map2k1	mitogen-activated protein kinase kinase 1	1859.17	1089.21	190.183	129.066	1.7069	0.000904065	0.00498848
10341540	---			185.85	108.919	95.5643	31.233	1.70631	0.20767	0.168549
10404195	BC115940	D130043K22Rik	RIKEN cDNA D130043K22 gene	1306.08	765.498	103.088	61.5138	1.70618	0.000314022	0.00273265
10607259	NM_001002272	Tro	trophinin	1403.81	822.876	107.598	95.415	1.70599	0.000207042	0.00219496
10569898	NM_001039578	Evi5l	ecotropic viral integration site 5 like	572.056	335.325	97.436	40.4623	1.70597	0.0108955	0.0221301
10519612	BC132290	9330182L06Rik	RIKEN cDNA 9330182L06 gene	1730.33	1014.41	114.886	97.4473	1.70575	9.03138e-05	0.00138926
10433735	NM_008576	Abcc1	ATP-binding cassette	630.028	369.362	59.9831	77.4097	1.70572	0.00215987	0.00826928
10455687	NM_001081224	Prr16	proline rich 16	397.675	233.274	6.40221	24.6313	1.70476	0.000519264	0.00366689
10500378	NM_001162925	Nudt17	nudix (nucleoside diphosphate linked moiety X)-type motif 17	358.273	210.257	30.7304	15.243	1.70397	0.000646126	0.00415211
10366026	NM_027740	Poc1b	POC1 centriolar protein homolog B (Chlamydomonas)	507.561	297.93	85.7176	36.3224	1.70362	0.0105261	0.0216856
10542740	NM_010656	Sspn	sarcospan	234.75	137.811	29.54	14.7532	1.70342	0.00308234	0.0102753
10384423	NM_172496	Cobl	cordon-bleu	1038.29	609.816	78.5356	58.2396	1.70263	0.000189444	0.00208239
10608671	---			567.33	333.252	110.903	41.6464	1.70241	0.0182641	0.0312277
10352152	NM_001161665	Kif26b	kinesin family member 26B	453.465	266.413	45.0628	14.9925	1.70212	0.00202109	0.00790459
10433782	NM_025769	Efcab1	EF hand calcium binding domain 1	516.623	303.558	46.1908	75.5496	1.70189	0.00491401	0.0134287
10566454	NM_028444	Prkcdbp	protein kinase C	872.34	512.587	26.3141	84.1033	1.70184	0.00193839	0.00774058
10578123	NM_019733	Rbpms	RNA binding protein gene with multiple splicing	159.86	93.9356	23.463	7.31946	1.7018	0.00794837	0.0181621
10363455	NM_025273	Pcbd1	pterin 4 alpha carbinolamine dehydratase	3761.71	2210.67	106.151	474.528	1.70162	0.00581804	0.0148545
10375903	NM_029976	Cdkn2aipnl	CDKN2A interacting protein N-terminal like	1471.09	864.606	34.5512	99.3442	1.70146	0.000482197	0.00349071
10369154	NM_008548	Man1a	mannosidase 1	142.008	83.4842	9.0653	7.74294	1.70102	7.44952e-05	0.00125478
10347672	NM_027886	Stk11ip	serine	371.556	218.434	71.4689	53.4063	1.70099	0.015734	0.0283219
10415408	NM_001040072	Nynrin	NYN domain and retroviral integrase containing	200.921	118.144	10.2348	13.5587	1.70065	0.000103362	0.00152022
10356628	NM_207225	Hdac4	histone deacetylase 4	799.654	470.224	31.3424	42.2279	1.70058	2.84431e-05	0.000785608
10521709	NM_024434	Lap3	leucine aminopeptidase 3	1296.11	762.32	81.5813	163.769	1.70022	0.00317517	0.0104389
10358677	NM_025819	1200016B10Rik	RIKEN cDNA 1200016B10 gene	298.208	175.43	39.6446	20.74	1.69987	0.00371706	0.0114542
10354389	NM_172653	Slc39a10	solute carrier family 39 (zinc transporter)	1241.17	730.712	92.0993	87.522	1.69857	0.000201169	0.00216568
10352066	NM_029756	Sdccag8	serologically defined colon cancer antigen 8	344.354	202.75	32.4811	21.8598	1.69842	0.000637129	0.00413886
10563685	NM_013643	Ptpn5	protein tyrosine phosphatase	204.073	120.165	11.51	15.0019	1.69827	0.000162739	0.00192567
10536444	NM_053242	Foxp2	forkhead box P2	119.976	70.6573	35.5106	7.70566	1.69799	0.0660674	0.0755754
10341737	---			189.14	111.406	75.3861	16.6494	1.69775	0.129332	0.121275
10380065	NR_004415	Rnu3b1	U3B small nuclear RNA 1	346.566	204.215	50.6523	25.553	1.69706	0.00561863	0.0145409
10546450	NM_175314	Adamts9	a disintegrin-like and metallopeptidase (reprolysin type) with thrombospondin type 1 motif	469.644	276.748	176.377	26.9545	1.69701	0.115308	0.111776
10535231	NM_175274	Ttyh3	tweety homolog 3 (Drosophila)	1831.14	1079.3	338.338	111.094	1.6966	0.0163999	0.0290571
10553833	NM_010882	Ndn	necdin	4908.09	2893	252.675	341.117	1.69654	0.000125092	0.00167471
10406426	NM_007684	Cetn3	centrin 3	678.059	399.875	120.647	71.7789	1.69568	0.0112071	0.0224626
10501586	NM_007901	S1pr1	sphingosine-1-phosphate receptor 1	416.909	245.886	120.099	65.4496	1.69553	0.058239	0.0690504
10374578	NM_028672	Fam161a	family with sequence similarity 161	134.975	79.6167	11.1718	8.16299	1.69531	0.000314726	0.00273592
10354111	NM_010678	Aff3	AF4	1223.55	721.945	25.2357	26.5306	1.6948	1.6101e-07	6.72497e-05
10538526	NM_030235	Avl9	AVL9 homolog (S. cerevisiase)	1516.09	894.738	94.3684	88.7612	1.69445	7.50647e-05	0.00125477
10416302	NM_021877	Hr	hairless	264.739	156.262	12.8374	40.9461	1.6942	0.00958784	0.0204172
10572679	NM_146211	Glt25d1	glycosyltransferase 25 domain containing 1	1133.07	669.059	45.6734	12.9522	1.69353	0.000110804	0.00157425
10467871	NM_028029	Dnmbp	dynamin binding protein	285.632	168.721	29.2519	8.72566	1.69293	0.0025504	0.00917178
10510708	NM_133788	Icmt	isoprenylcysteine carboxyl methyltransferase	775.929	458.354	60.5613	34.5558	1.69286	0.000341974	0.00286545
10526614	NM_031404	Actl6b	actin-like 6B	1075.93	635.687	8.29647	82.4995	1.69254	0.00163225	0.0069999
10536898	NM_012057	Irf5	interferon regulatory factor 5	206.968	122.285	33.9859	11.0023	1.6925	0.0114846	0.0228001
10496091	NM_010703	Lef1	lymphoid enhancer binding factor 1	144.959	85.6641	21.7728	11.7644	1.69219	0.00605945	0.0152472
10478847	NM_001081005	1500012F01Rik	RIKEN cDNA 1500012F01 gene	672.848	397.699	66.7882	95.3316	1.69185	0.00432109	0.0124908
10528143	NM_008889	Ppp1r14b	protein phosphatase 1	758.706	448.455	93.9377	39.2925	1.69182	0.00361269	0.0112824
10554588	NM_017400	Sh3gl3	SH3-domain GRB2-like 3	316.269	187.009	18.3609	39.8861	1.6912	0.0035201	0.011097
10560015	NM_025999	Rnf141	ring finger protein 141	1730.68	1023.41	131.328	172.96	1.69109	0.000824342	0.00472329
10599377	NM_021465	Stag2	stromal antigen 2	682.707	403.733	120.678	86.8028	1.69099	0.0113117	0.0225909
10608685	---			611.93	361.884	49.0222	64.4404	1.69096	0.00107175	0.00549291
10382797	NM_176902	Fam100b	family with sequence similarity 100	717.069	424.364	93.6505	42.1275	1.68975	0.00413198	0.0121373
10363118	NM_025705	Dcbld1	discoidin	838.16	496.116	53.5915	55.4297	1.68944	0.000114794	0.00159566
10502791	NM_133871	Ifi44	interferon-induced protein 44	194.075	114.938	68.929	43.8582	1.68852	0.10947	0.107907
10585381	NM_028060	Slc35f2	solute carrier family 35	206.974	122.611	36.0327	38.5227	1.68806	0.0187445	0.0317373
10436945	NM_017391	Slc5a3	solute carrier family 5 (inositol transporters)	950.455	563.117	134.423	74.1261	1.68785	0.00476966	0.0132071
10468992	NM_172475	Frmd4a	FERM domain containing 4A	817.291	484.258	115.088	16.9078	1.68772	0.00941161	0.0201757
10516393	NM_153177	Eif2c4	eukaryotic translation initiation factor 2C	192.934	114.332	44.3055	14.6184	1.68748	0.032341	0.0456534
10404218	NM_008156	Gpld1	glycosylphosphatidylinositol specific phospholipase D1	325.515	193.065	71.1846	45.4278	1.68604	0.0250978	0.0383936
10454786	NM_009818	Ctnna1	catenin (cadherin associated protein)	1284.48	762.045	125.969	145.62	1.68557	0.00173304	0.00726069
10386850	NM_011308	Ncor1	nuclear receptor co-repressor 1	2124.73	1261.52	360.603	141.773	1.68427	0.0118192	0.0232268
10554375	NM_013659	Sema4b	sema domain	823.208	488.787	151.293	35.8046	1.68419	0.0185925	0.031563
10599997	NM_016985	Mtmr1	myotubularin related protein 1	374.824	222.603	52.194	45.2813	1.68383	0.00475791	0.0131964
10369525	BC024943	2010107G23Rik	RIKEN cDNA 2010107G23 gene	429.353	254.99	127.203	57.0053	1.68381	0.0642826	0.0742044
10344939	NM_009352	Terf1	telomeric repeat binding factor 1	508.292	302.065	87.863	66.5415	1.68272	0.0109284	0.02217
10361065	NM_001081259	Mfsd7b	major facilitator superfamily domain containing 7B	1567	931.464	121.993	158.444	1.6823	0.000909223	0.00499714
10415875	NM_028228	Pinx1	PIN2	428.01	254.44	57.7514	42.4528	1.68217	0.00362405	0.0112926
10544487	NM_013861	Tpk1	thiamine pyrophosphokinase	242.994	144.473	37.0847	20.5709	1.68194	0.00658348	0.0160065
10343636	---			490.79	291.843	219.407	55.1678	1.68169	0.1665	0.144618
10527547	NM_025652	Gtf3a	general transcription factor III A	750.645	446.422	51.3177	35.0917	1.68147	0.000136063	0.00175412
10476795	BC048610	4930529M08Rik	RIKEN cDNA 4930529M08 gene	167.539	99.6647	12.7577	7.76016	1.68103	0.000283199	0.00256599
10476108	NM_001110513	Ebf4	early B-cell factor 4	731.091	435.029	106.114	57.918	1.68056	0.00546842	0.0143028
10339316	---			364.765	217.056	111.552	100.114	1.68051	0.0967844	0.0988673
10435226	NM_080557	Snx4	sorting nexin 4	1479.56	880.5	117.612	99.5079	1.68037	0.000271496	0.00252851
10516590	NM_028603	Zbtb8a	zinc finger and BTB domain containing 8a	421.216	250.686	55.6215	21.1086	1.68025	0.00516163	0.0138206
10368101	NM_001033258	D10Bwg1379e	DNA segment	2445.79	1456.04	217.922	118.197	1.67976	0.000710607	0.0043554
10442250	NM_001164676	Zfp229	zinc finger protein	260.84	155.305	53.4684	41.6482	1.67953	0.0223898	0.0354789
10413951	NM_153800	Arhgap22	Rho GTPase activating protein 22	381.812	227.466	20.9541	30.8867	1.67855	0.000323736	0.00277384
10574656	NM_015821	Fbxl8	F-box and leucine-rich repeat protein 8	213.283	127.107	22.9269	6.14055	1.67798	0.00339011	0.0108261
10496494	NM_019571	Tspan5	tetraspanin 5	2316.18	1380.35	130.526	94.6057	1.67797	4.63216e-05	0.000981701
10356339	NM_008801	Pde6d	phosphodiesterase 6D	6223.78	3709.37	546.415	30.9001	1.67785	0.00265686	0.00942081
10381683	NM_025988	Acbd4	acyl-Coenzyme A binding domain containing 4	242.583	144.612	81.6136	19.4204	1.67747	0.0927515	0.0959918
10588380	NM_028719	Cpne4	copine IV	1944.49	1159.42	287.443	120.112	1.67713	0.00720185	0.0169907
10363350	NM_011030	P4ha1	procollagen-proline	883.387	526.878	10.5277	92.6071	1.67664	0.00423929	0.012344
10579422	NM_032397	Kcnn1	potassium intermediate	439.648	262.27	65.3951	17.5586	1.67632	0.00959692	0.0204158
10388591	NM_007754	Cpd	carboxypeptidase D	2266.02	1352.02	282.777	119.9	1.67603	0.00385996	0.0116876
10595183	NM_010106	Eef1a1	eukaryotic translation elongation factor 1 alpha 1	10812.4	6452.4	480.354	622.723	1.67571	4.8619e-05	0.000990255
10417757	NM_009190	Vps4b	vacuolar protein sorting 4b (yeast)	1421.76	848.726	92.7592	118.873	1.67517	0.00035429	0.00291313
10543791	NM_013723	Podxl	podocalyxin-like	196.987	117.618	34.0906	15.717	1.6748	0.0119394	0.0234191
10587942	NM_011916	Xrn1	5'-3' exoribonuclease 1	386.335	230.729	84.1732	33.6012	1.67441	0.0271649	0.0406184
10462912	NM_020278	Lgi1	leucine-rich repeat LGI family	4305.85	2572.87	607.563	252.549	1.67356	0.00619297	0.0154344
10576844	NM_207203	BC068157	cDNA sequence BC068157	173.952	103.951	20.8078	10.0432	1.67341	0.0028962	0.00989971
10370946	NM_172457	Mobkl2a	MOB1	1123.73	671.658	207.045	103.81	1.67307	0.0144486	0.0266689
10567316	NM_172476	Tmc7	transmembrane channel-like gene family 7	808.369	483.215	135.047	60.8088	1.6729	0.0107362	0.0219505
10343030	---			333.913	199.669	133.21	71.7377	1.67233	0.141151	0.128957
10447594	NM_001166629	Dynlt1a	dynein light chain Tctex-type 1A	1492.35	892.439	216.727	167.146	1.67221	0.00538924	0.014198
10593526	NM_007499	Atm	ataxia telangiectasia mutated homolog (human)	470.411	281.367	55.124	57.0745	1.67188	0.00312071	0.0103454
10468030	NM_001195265	Pdzd7	PDZ domain containing 7	273.751	163.775	46.6962	24.3565	1.6715	0.0107873	0.0220066
10501235	NM_026764	Gstm4	glutathione S-transferase	1110.82	664.595	238.837	172.978	1.67142	0.0260697	0.0394254
10415725	NM_001033272	Spata13	spermatogenesis associated 13	852.567	510.148	70.1411	56.5926	1.67121	0.000332731	0.0028191
10452508	NM_023053	Twsg1	twisted gastrulation homolog 1 (Drosophila)	762.996	456.605	60.1881	73.2451	1.67102	0.000753126	0.00450366
10534883	NM_010571	Irs3	insulin receptor substrate 3	161.142	96.4548	32.316	10.0305	1.67064	0.0230359	0.0361937
10462454	NM_144873	Uhrf2	ubiquitin-like	764.901	457.856	130.23	81.4091	1.67061	0.0101982	0.021283
10562461	NM_178643	C230052I12Rik	RIKEN cDNA C230052I12 gene	504.924	302.252	79.925	71.4885	1.67054	0.00939172	0.0201589
10567131	NM_027091	Nup35	nucleoporin 35	698.645	418.243	31.0382	45.9283	1.67043	0.000119577	0.00162167
10460376	NM_031868	Ppp1ca	protein phosphatase 1	4437.32	2656.56	319.714	126.894	1.67032	0.000542983	0.00376438
10603135	NM_001146081	Fancb	Fanconi anemia	112.938	67.6286	17.5964	15.361	1.66997	0.00846759	0.0189444
10512728	NM_173033	Tstd2	thiosulfate sulfurtransferase (rhodanese)-like domain containing 2	682.036	408.532	53.0153	87.0746	1.66948	0.00310813	0.0103242
10433656	NM_153588	Mkl2	MKL	1177.54	705.76	307.432	78.8567	1.66847	0.050477	0.0625737
10370818	NM_198615	Mex3d	mex3 homolog D (C. elegans)	500.25	300.039	103.276	12.0507	1.66728	0.0294738	0.0429261
10472970	NM_010469	Hoxd4	homeobox D4	148.681	89.1831	32.8018	10.6384	1.66714	0.0304481	0.0439088
10353899	NM_001126047	Sema4c	sema domain	403.745	242.193	92.1737	28.0726	1.66704	0.0341168	0.0473992
10468180	NM_028627	Psd	pleckstrin and Sec7 domain containing	252.022	151.21	18.9834	33.3794	1.6667	0.00384739	0.0116707
10558948	NM_009842	Cd151	CD151 antigen	4034.93	2420.92	959.371	493.21	1.66669	0.0348341	0.0481079
10356997	---			166.729	100.133	67.0876	12.7767	1.66508	0.14	0.128228
10605067	NM_012040	Pnck	pregnancy upregulated non-ubiquitously expressed CaM kinase	538.097	323.199	66.5402	48.5631	1.66491	0.00259175	0.00927656
10454235	NM_001167777	Asxl3	additional sex combs like 3 (Drosophila)	533.09	320.23	153.965	69.8677	1.66471	0.0627754	0.0728774
10437040	NM_028083	Chaf1b	chromatin assembly factor 1	205.985	123.745	47.7727	14.269	1.6646	0.0360433	0.0493131
10357164	NM_145506	Epb4.1l5	erythrocyte protein band 4.1-like 5	454.283	272.958	54.9735	43.5551	1.6643	0.00241551	0.00888948
10403604	NM_010748	Lyst	lysosomal trafficking regulator	1212.9	728.916	97.6615	82.2598	1.66398	0.000313613	0.00273193
10457872	NM_139143	Slc39a6	solute carrier family 39 (metal ion transporter)	1612.02	968.856	178.68	97.4926	1.66384	0.0019145	0.00766717
10401149	NM_013738	Plek2	pleckstrin 2	205.829	123.727	38.9127	25.617	1.66358	0.01583	0.0284335
10447591	NM_010240	Ftl1	ferritin light chain 1	350.754	210.853	71.8472	15.3554	1.6635	0.0272751	0.0407105
10425814	NM_172610	Mpped1	metallophosphoesterase domain containing 1	414.36	249.102	74.2944	40.68	1.66342	0.0131078	0.0249551
10422179	NM_011143	Pou4f1	POU domain	1419.88	853.619	90.2406	70.9314	1.66337	8.68856e-05	0.00135441
10416800	NM_201529	Lmo7	LIM domain only 7	130.811	78.6914	48.291	18.9383	1.66233	0.116633	0.112759
10604380	NM_172465	Zdhhc9	zinc finger	3032.26	1824.19	144.353	115.261	1.66225	1.77056e-05	0.000616107
10478776	NM_001085495	Arfgef2	ADP-ribosylation factor guanine nucleotide-exchange factor 2 (brefeldin A-inhibited)	1334.07	802.813	138.855	157.167	1.66175	0.00239964	0.00885059
10562605	BC099396	AI987944	expressed sequence AI987944	180.565	108.699	12.776	26.0866	1.66114	0.00620007	0.0154383
10345212	NM_133235	Khdrbs2	KH domain containing	218.82	131.738	38.6909	26.4948	1.66102	0.0123912	0.0240176
10498978	NM_023624	Lrat	lecithin-retinol acyltransferase (phosphatidylcholine-retinol-O-acyltransferase)	135.474	81.5671	25.3914	12.1574	1.66089	0.0162278	0.0288686
10546685	NM_025829	Eif4e3	eukaryotic translation initiation factor 4E member 3	1274.23	767.281	45.4778	44.8123	1.66071	3.96433e-06	0.000295374
10473779	ENSMUST00000068747	Celf1	CUGBP	216.557	130.414	38.4126	26.8293	1.66054	0.012652	0.0243593
10357878	NM_001008533	Adora1	adenosine A1 receptor	1173.84	707.259	210.005	205.986	1.6597	0.0192737	0.0323512
10362633	NM_011264	Rev3l	REV3-like	650.768	392.107	192.681	51.9125	1.65967	0.0705509	0.0792607
10341269	---			645.399	388.938	40.5743	109.043	1.65939	0.0129061	0.0246948
10454735	BC057111	Fam53c	family with sequence similarity 53	536.721	323.499	81.4463	46.4813	1.65911	0.00688055	0.0164747
10569513	NM_024289	Osbpl5	oxysterol binding protein-like 5	760.174	458.233	83.1382	39.1522	1.65892	0.00220347	0.00837098
10480921	NM_153559	Qsox2	quiescin Q6 sulfhydryl oxidase 2	377.217	227.389	52.5602	40.2718	1.6589	0.00469779	0.0131167
10399337	NM_001164493	Klhl29	kelch-like 29 (Drosophila)	922.668	556.274	51.9493	41.1362	1.65866	4.58018e-05	0.000983581
10448235	NM_001110254	A630033E08Rik	RIKEN cDNA A630033E08 gene	462.668	279.162	65.0655	46.4122	1.65734	0.00480096	0.013263
10392152	NM_133199	Scn4a	sodium channel	169.011	102.019	25.4116	21.916	1.65666	0.00749796	0.0174236
10483215	NM_018732	Scn3a	sodium channel	358.26	216.345	79.4155	26.8371	1.65596	0.031478	0.0448826
10586844	NM_007399	Adam10	a disintegrin and metallopeptidase domain 10	1088.41	657.751	113.728	116.681	1.65474	0.00185802	0.00756795
10400894	NM_181752	Gpr135	G protein-coupled receptor 135	498.835	301.479	111.256	29.5605	1.65463	0.0339362	0.0472112
10421046	NM_177780	Dock5	dedicator of cytokinesis 5	1526.27	922.5	107.127	70.4024	1.65449	0.000186932	0.00207113
10414350	NM_080843	Socs4	suppressor of cytokine signaling 4	799.461	483.314	162.229	71.5798	1.65412	0.0222805	0.0353659
10507699	NM_013883	Scmh1	sex comb on midleg homolog 1	635.4	384.273	84.5768	37.241	1.65351	0.00510203	0.013727
10354792	NR_004860	1110034B05Rik	RIKEN cDNA 1110034B05 gene	431.286	260.863	87.2367	53.0973	1.6533	0.0208953	0.0340072
10478962	NM_025912	2010011I20Rik	RIKEN cDNA 2010011I20 gene	587.935	355.756	140.077	26.7291	1.65264	0.0427427	0.0557404
10372151	NM_001163559	Lrriq1	leucine-rich repeats and IQ motif containing 1	171.781	103.976	30.6721	26.8779	1.65212	0.01631	0.0289655
10404965	NM_146042	Rnf144b	ring finger protein 144B	514.035	311.163	76.6367	33.7169	1.65198	0.00776297	0.0178704
10490777	NM_030708	Zfhx4	zinc finger homeodomain 4	580.067	351.351	150.075	46.2043	1.65096	0.0501243	0.0622289
10585048	NM_207675	Cadm1	cell adhesion molecule 1	3608.77	2189.43	176.834	121.949	1.64827	2.8273e-05	0.000785443
10348424	NM_133816	Sh3bp4	SH3-domain binding protein 4	404.561	245.475	36.0983	22.0298	1.64807	0.000678674	0.00424374
10536429	NM_027992	Tmem106b	transmembrane protein 106B	1824.97	1107.73	100.149	112.855	1.64749	8.38996e-05	0.0013376
10488806	NM_026030	Eif2s2	eukaryotic translation initiation factor 2	438.265	266.042	57.0324	69.1094	1.64735	0.00911571	0.019878
10425695	NM_033218	Srebf2	sterol regulatory element binding factor 2	2572.4	1561.69	201.983	198.854	1.64719	0.000383105	0.00303649
10540227	NM_001008785	Kbtbd8	kelch repeat and BTB (POZ) domain containing 8	141.772	86.0773	34.8382	20.4837	1.64702	0.0413226	0.0543551
10370000	NM_008185	Gstt1	glutathione S-transferase	410.541	249.284	32.4933	59.5645	1.64688	0.00616721	0.015407
10602454	NM_198105	Fam120c	family with sequence similarity 120	762.744	463.23	50.9368	25.935	1.64658	0.000262461	0.00248594
10521832	NM_028744	Pi4k2b	phosphatidylinositol 4-kinase type 2 beta	108.35	65.8083	14.5726	9.6337	1.64644	0.00412806	0.0121386
10452496	NM_009067	Ralbp1	ralA binding protein 1	1305.83	793.164	89.4524	88.2126	1.64636	0.000182265	0.002066
10340606	---			2196.17	1334.02	451.946	121.272	1.64629	0.027583	0.0409723
10545623	NM_010070	Dok1	docking protein 1	137.915	83.7755	40.0887	9.55635	1.64624	0.0702257	0.0790335
10408243	NM_178192	Hist1h4a	histone cluster 1	3437.92	2088.35	612.486	192.694	1.64624	0.0171246	0.0298973
10443391	NM_011951	Mapk14	mitogen-activated protein kinase 14	1289.27	783.288	83.5243	50.1198	1.64597	0.000157691	0.00189275
10358091	NM_173437	Nav1	neuron navigator 1	2632.87	1599.83	203.992	207.609	1.64571	0.000393067	0.00308038
10386211	NM_029283	Fam183b	family with sequence similarity 183	136.212	82.7959	15.1727	1.74992	1.64515	0.00550421	0.0143739
10378697	NM_008659	Myo1c	myosin IC	415.337	252.519	36.5255	16.0712	1.64478	0.00108147	0.00552576
10503882	NM_011884	Rngtt	RNA guanylyltransferase and 5'-phosphatase	671.601	408.449	70.4351	87.7032	1.64427	0.00382807	0.0116374
10595979	NM_008624	Mras	muscle and microspikes RAS	1046.99	637.137	264.458	186.817	1.64327	0.0489349	0.0612621
10557742	NM_172748	Fbxl19	F-box and leucine-rich repeat protein 19	367.69	223.76	70.7698	27.3895	1.64323	0.0203213	0.0333657
10476740	NM_053195	Slc24a3	solute carrier family 24 (sodium	765.916	466.185	46.5837	71.3496	1.64295	0.00078371	0.00460092
10382136	NM_001163473	1810010H24Rik	RIKEN cDNA 1810010H24 gene	283.517	172.596	59.1334	32.1773	1.64266	0.0241691	0.0373975
10371230	NM_010301	Gna11	guanine nucleotide binding protein	1971.42	1200.42	142.378	75.6743	1.64227	0.000341969	0.00286828
10482167	NM_146253	Zbtb6	zinc finger and BTB domain containing 6	339.704	206.885	55.7845	29.967	1.64199	0.0102249	0.021296
10459747	NM_172632	Mapk4	mitogen-activated protein kinase 4	608.993	371.081	37.5967	25.4478	1.64113	9.94866e-05	0.00147904
10354883	NM_175370	Als2cr12	amyotrophic lateral sclerosis 2 (juvenile) chromosome region	116.89	71.2384	15.0587	9.6555	1.64083	0.0035308	0.0111139
10496425	NM_009626	Adh7	alcohol dehydrogenase 7 (class IV)	112.351	68.4726	17.8628	2.35958	1.64082	0.0152643	0.0277333
10593245	NM_020274	Htr3b	5-hydroxytryptamine (serotonin) receptor 3B	762.576	464.809	140.851	100.915	1.64062	0.0161859	0.028831
10363210	NM_008863	Pkib	protein kinase inhibitor beta	317.149	193.348	29.8614	12.5032	1.6403	0.00153799	0.00675163
10382028	NM_011947	Map3k3	mitogen-activated protein kinase kinase kinase 3	502.773	306.542	69.6926	31.6977	1.64014	0.00604556	0.0152306
10469571	NM_027715	Otud1	OTU domain containing 1	205.464	125.279	20.0932	27.4429	1.64006	0.00411833	0.0121185
10604630	NM_027409	Mospd1	motile sperm domain containing 1	1163.16	709.324	146.961	181.239	1.63981	0.00876496	0.0193762
10553537	NM_178705	Luzp2	leucine zipper protein 2	3262.09	1989.38	502.566	316.979	1.63975	0.00762469	0.0176396
10425511	NM_177310	Xpnpep3	X-prolyl aminopeptidase (aminopeptidase P) 3	587.066	358.045	49.4009	41.7657	1.63964	0.000448935	0.00336058
10537463	NM_023538	Agk	acylglycerol kinase	1104.2	673.496	57.999	119.775	1.6395	0.00221552	0.00840149
10512655	NM_001038993	Rnf38	ring finger protein 38	1600.58	976.308	144.135	79.459	1.63942	0.000851805	0.00482439
10457203	---			307.628	187.644	58.9508	60.6866	1.63942	0.0297376	0.0431749
10517312	NM_025382	Tmem57	transmembrane protein 57	817.687	498.945	78.6836	58.9181	1.63883	0.000864625	0.00488046
10512739	NM_011728	Xpa	xeroderma pigmentosum	427.646	261.003	92.3031	26.5942	1.63847	0.0317509	0.0450794
10546434	NM_175314	Adamts9	a disintegrin-like and metallopeptidase (reprolysin type) with thrombospondin type 1 motif	374.112	228.342	105.664	15.1721	1.63838	0.0687376	0.0779151
10533316	NM_026129	Erp29	endoplasmic reticulum protein 29	359.962	219.808	97.1351	42.231	1.63762	0.0558283	0.0671161
10515201	NM_007823	Cyp4b1	cytochrome P450	155.82	95.1692	25.0299	9.31231	1.63729	0.0116951	0.0230699
10425686	NM_172428	Ccdc134	coiled-coil domain containing 134	427.796	261.315	48.7611	21.9369	1.63709	0.00295381	0.0100147
10491385	NM_019673	Actl6a	actin-like 6A	1104.35	674.781	16.2757	91.1663	1.6366	0.00205612	0.00798922
10559766	NM_001033249	Zfp583	zinc finger protein 583	252.916	154.545	29.1143	39.7776	1.63652	0.00859311	0.0191279
10492864	NM_001082414	Sh3d19	SH3 domain protein D19	589.192	360.053	53.9608	61.9082	1.6364	0.00149536	0.00664125
10377612	NR_033133	Plscr3	phospholipid scramblase 3	819.253	500.902	122.326	71.6165	1.63556	0.00696854	0.0166187
10534168	NM_177047	Auts2	autism susceptibility candidate 2	990.666	605.96	184.965	23.2547	1.63487	0.0242857	0.0375431
10402347	NM_029803	Ifi27l2a	interferon	128.251	78.4577	22.1623	11.9119	1.63465	0.0127031	0.0244295
10415248	NM_028994	Pck2	phosphoenolpyruvate carboxykinase 2 (mitochondrial)	774.112	473.888	117.665	53.3184	1.63353	0.00869139	0.0192901
10492720	NM_001081230	Mtap9	microtubule-associated protein 9	863.975	528.981	84.1026	102.702	1.63328	0.00261411	0.00930873
10565072	NM_019951	Sec11a	SEC11 homolog A (S. cerevisiae)	649.372	397.673	34.9847	82.7652	1.63293	0.00484311	0.0133397
10475772	NM_139308	Stard7	START domain containing 7	946.4	579.597	40.4036	101.776	1.63286	0.00276859	0.00963702
10595990	NM_028768	Armc8	armadillo repeat containing 8	1034.58	633.744	108.503	85.3741	1.63248	0.00138129	0.00634027
10584803	NM_023831	Ift46	intraflagellar transport 46 homolog (Chlamydomonas)	1992.04	1220.85	204.136	58.892	1.63168	0.00316226	0.0104211
10354845	NM_008765	Orc2	origin recognition complex	738.23	452.443	27.0808	111.583	1.63165	0.0119081	0.0233686
10517328	NM_027935	Tmem50a	transmembrane protein 50A	5801.61	3555.7	439.304	344.181	1.63164	0.000260113	0.00247775
10489891	NM_019835	B4galt5	UDP-Gal:betaGlcNAc beta 1	2146.9	1316.65	108.56	130.88	1.63058	8.12265e-05	0.00130955
10478160	BC068129	Fam83d	family with sequence similarity 83	135.411	83.0639	13.363	6.74008	1.63021	0.00148534	0.00662142
10493137	NM_001033484	Iqgap3	IQ motif containing GTPase activating protein 3	138.76	85.1289	8.85636	7.87583	1.62999	0.000110159	0.00156775
10378126	NM_009671	Ankfy1	ankyrin repeat and FYVE domain containing 1	1317.47	808.413	66.0391	101.301	1.6297	0.000332022	0.00281595
10592342	NM_025289	Tbrg1	transforming growth factor beta regulated gene 1	2645.39	1623.28	90.7633	164.478	1.62965	0.000170305	0.00196781
10544015	NM_011732	Ybx1	Y box protein 1	948.251	581.895	92.1149	98.7944	1.62959	0.00165163	0.00704684
10582376	NM_001037298	Fam38a	family with sequence similarity 38	194.104	119.141	37.553	10.5707	1.6292	0.0238976	0.0371287
10403868	---			303.019	186.04	17.0755	26.9597	1.62878	0.000695578	0.0042948
10569886	NM_025701	Trappc5	trafficking protein particle complex 5	776.617	476.883	106.678	15.2302	1.62853	0.0102983	0.0214064
10558769	NM_026820	Ifitm1	interferon induced transmembrane protein 1	188.135	115.548	67.3943	15.4653	1.62821	0.117961	0.113622
10562548	NM_011274	C80913	expressed sequence C80913	760.109	466.841	91.6997	59.5582	1.6282	0.00277087	0.00964091
10398039	NM_001168294	Serpina3f	serine (or cysteine) peptidase inhibitor	418.493	257.047	55.6347	58.0177	1.62808	0.00700816	0.0166941
10578193	NM_026067	Eri1	exoribonuclease 1	386.379	237.333	16.0561	49.2028	1.628	0.0060305	0.0152018
10359446	NM_172645	AI848100	expressed sequence AI848100	868.726	533.751	83.0479	85.5328	1.62759	0.00136025	0.00628165
10537227	NM_197986	Tmem140	transmembrane protein 140	185.331	113.938	34.7947	14.5519	1.6266	0.0191764	0.0322918
10561485	NM_027470	Pak4	p21 protein (Cdc42	323.592	198.941	11.5087	15.3189	1.62657	2.22343e-05	0.000702495
10551614	NM_016772	Ech1	enoyl coenzyme A hydratase 1	1607.49	988.303	164.365	52.2606	1.62651	0.00294889	0.0100061
10529410	NM_026660	Mfsd10	major facilitator superfamily domain containing 10	809.535	497.822	102.042	60.9902	1.62615	0.0035448	0.0111412
10534842	NM_010312	Gnb2	guanine nucleotide binding protein (G protein)	3355.08	2063.7	397.089	218.28	1.62576	0.00290866	0.00990986
10508012	NM_138683	Rspo1	R-spondin homolog (Xenopus laevis)	576.858	354.865	106.6	9.13129	1.62557	0.0247172	0.0380201
10508436	NM_023485	Sync	syncoilin	3086.08	1898.58	591.094	260.296	1.62547	0.0201714	0.0332502
10361682	NM_026141	Ppil4	peptidylprolyl isomerase (cyclophilin)-like 4	397.629	244.703	31.1989	39.178	1.62495	0.0010539	0.00545496
10595126	NM_023605	Fbxo9	f-box protein 9	1317.17	810.625	160.361	116.541	1.62489	0.00287294	0.0098363
10451039	NM_028711	Slc25a27	solute carrier family 25	1011.63	622.593	123.321	46.2664	1.62487	0.00471451	0.0131415
10598198	NM_177389	Mia3	melanoma inhibitory activity 3	1094.3	673.512	122.728	98.7269	1.62476	0.00202155	0.00790269
10403193	NM_009239	Sp4	trans-acting transcription factor 4	334.916	206.176	59.4798	34.4008	1.62442	0.0143372	0.0264985
10340423	---			1648.78	1015.02	431.169	110.849	1.62438	0.056419	0.0676025
10556640	NM_182995	6330503K22Rik	RIKEN cDNA 6330503K22 gene	1450.13	892.933	174.858	153.194	1.624	0.00316372	0.0104177
10346150	NM_019790	Tmeff2	transmembrane protein with EGF-like and two follistatin-like domains 2	4303.79	2650.4	555.059	327.051	1.62382	0.00397974	0.0119036
10399234	NM_001082483	Efr3b	EFR3 homolog B (S. cerevisiae)	1208.92	744.565	63.0915	63.3859	1.62366	4.66976e-05	0.000985181
10456363	NM_010307	Gnal	guanine nucleotide binding protein	4025	2479.62	263.451	36.2043	1.62324	0.00114757	0.00573372
10419999	NM_177049	Jph4	junctophilin 4	550.942	339.53	47.4915	41.4404	1.62266	0.000574906	0.00389203
10558919	NR_034049	Snora52	small nucleolar RNA	1244.97	767.64	320.968	35.7791	1.62182	0.0579382	0.0688207
10385699	NM_025346	Rmnd5b	required for meiotic nuclear division 5 homolog B (S. cerevisiae)	2361.55	1456.15	194.409	116.289	1.62178	0.000541731	0.00376195
10342642	---			223.922	138.092	58.9919	44.1453	1.62155	0.0620511	0.0722775
10399061	NM_028731	Esyt2	extended synaptotagmin-like protein 2	1395.68	860.813	143.039	106.117	1.62135	0.00128506	0.00609272
10436442	NM_019643	Fam60a	family with sequence similarity 60	310.501	191.549	103.807	57.8626	1.62101	0.105333	0.105107
10396440	XM_204772	Gm5068	predicted gene 5068	150.199	92.6831	16.2804	7.21346	1.62056	0.00263707	0.00936652
10544768	NM_010453	Hoxa5	homeobox A5	152.391	94.0787	29.0873	19.386	1.61983	0.0193004	0.0323701
10383681	NM_019574	Patz1	POZ (BTB) and AT hook containing zinc finger 1	145.128	89.5956	10.715	9.5701	1.61981	0.000261411	0.00248162
10364280	NM_145925	Pttg1ip	pituitary tumor-transforming 1 interacting protein	1209.2	746.606	136.743	59.6869	1.6196	0.0031607	0.0104242
10474399	NM_001048139	Bdnf	brain derived neurotrophic factor	252.001	155.602	77.1073	9.46858	1.61952	0.0866551	0.0918443
10591228	NM_011753	Zfp26	zinc finger protein 26	538.869	332.739	96.4853	56.5433	1.61949	0.0150285	0.0274483
10601588	BC027572	3110007F17Rik	RIKEN cDNA 3110007F17 gene	1021.29	630.778	130.377	85.2121	1.6191	0.00369782	0.0114286
10362479	NM_001162937	Bet3l	BET3 like (S. cerevisiae)	2313.7	1429.34	843.474	305.605	1.61872	0.124181	0.11766
10410408	NM_153534	Adcy2	adenylate cyclase 2	1069.62	660.8	109.288	135.755	1.61867	0.00377059	0.0115214
10355050	NM_001045513	Raph1	Ras association (RalGDS	2035.04	1257.24	105.742	51.2798	1.61866	0.000113655	0.00159308
10492049	NM_019995	Fam48a	family with sequence similarity 48	727.893	449.96	93.8236	92.3373	1.61768	0.00554826	0.0144483
10408092	NM_175657	Hist1h4m	histone cluster 1	2128.94	1316.1	276.006	186.534	1.61761	0.00395561	0.0118526
10594540	NM_153119	Plekho2	pleckstrin homology domain containing	298.453	184.551	62.7743	32.0174	1.61719	0.027248	0.0406845
10522009	NM_025700	Pgm1	phosphoglucomutase 1	351.707	217.541	92.9698	47.2827	1.61674	0.05567	0.0670029
10506603	NM_023672	Ssbp3	single-stranded DNA binding protein 3	2737.23	1693.13	109.806	230.433	1.61667	0.00089148	0.00494845
10405432	NM_016758	Rgs14	regulator of G-protein signaling 14	176.466	109.169	14.9338	8.26899	1.61645	0.000710838	0.00435362
10531197	NM_177872	Adamts3	a disintegrin-like and metallopeptidase (reprolysin type) with thrombospondin type 1 motif	505.975	313.023	136.684	145.797	1.61642	0.101905	0.102716
10552740	NM_053074	Nup62	nucleoporin 62	1049.37	649.38	208.896	124.781	1.61596	0.0224342	0.0355222
10406941	NM_144838	Sgtb	small glutamine-rich tetratricopeptide repeat (TPR)-containing	2253.1	1394.67	84.6648	160.035	1.61551	0.000359919	0.00293343
10604057	NR_033443	Sept6	septin 6	2579.73	1597.14	86.7988	119.691	1.61522	2.25521e-05	0.000704479
10591224	NM_001004190	Zfp560	zinc finger protein 560	141.815	87.823	25.0149	7.38728	1.61478	0.0186643	0.03164
10575733	NM_028131	Cenpn	centromere protein N	319.525	197.899	18.7615	35.4493	1.61458	0.00242011	0.00890249
10515396	NR_024078	Btbd19	BTB (POZ) domain containing 19	175.073	108.452	12.7429	11.9707	1.61429	0.000271102	0.00253332
10393662	NM_008730	Nptx1	neuronal pentraxin 1	2927.05	1813.22	1648.47	538.145	1.61428	0.274724	0.203986
10453436	NM_176808	Mcfd2	multiple coagulation factor deficiency 2	586.935	363.589	40.332	36.3493	1.61428	0.000184031	0.00206639
10392063	NM_172397	Limd2	LIM domain containing 2	1313.07	813.48	133.952	146.479	1.61414	0.00242633	0.00891362
10585942	NM_001033498	Gramd2	GRAM domain containing 2	158.773	98.3808	14.3841	11.0674	1.61386	0.000721824	0.00440155
10356601	NM_011066	Per2	period homolog 2 (Drosophila)	232.877	144.328	10.8531	9.99118	1.61353	2.12718e-05	0.000689691
10339812	---			1124.82	697.462	34.5138	123.711	1.61273	0.00434474	0.0125202
10606369	NM_008409	Itm2a	integral membrane protein 2A	264.457	163.989	128.742	75.0213	1.61265	0.237306	0.185034
10577866	NM_011791	Ash2l	ash2 (absent	1159.62	719.111	187.554	75.2924	1.61258	0.0124608	0.0241078
10388488	NM_029658	Fam101b	family with sequence similarity 101	376.436	233.469	68.9461	47.7506	1.61236	0.0171901	0.0299741
10427744	NM_030690	Rai14	retinoic acid induced 14	232.017	143.907	27.8226	25.0067	1.61227	0.00338868	0.0108256
10420030	NM_011190	Psme2	proteasome (prosome	1408.54	873.702	307.063	213.282	1.61215	0.0327385	0.0460124
10355836	NM_009049	Resp18	regulated endocrine-specific protein 18	1469.5	911.707	234.389	177.186	1.61181	0.0102992	0.021403
10509868	NM_029097	Atp13a2	ATPase type 13A2	1484.03	920.736	387.626	103.729	1.61179	0.0578301	0.0687608
10526520	NM_011962	Plod3	procollagen-lysine	994.191	616.916	422.992	98.2692	1.61155	0.171704	0.147665
10597173	NM_026012	Nradd	neurotrophin receptor associated death domain	213.589	132.537	55.5699	27.688	1.61155	0.0539289	0.0654448
10572290	NM_001025586	Nr2c2ap	nuclear receptor 2C2-associated protein	879.645	546.206	274.003	127.267	1.61046	0.0881105	0.0929036
10563295	NM_010240	Ftl1	ferritin light chain 1	5928.36	3682.19	328.463	249.956	1.61001	5.59371e-05	0.0010835
10526656	NM_146164	Lrch4	leucine-rich repeats and calponin homology (CH) domain containing 4	569.556	353.764	26.3811	28.1164	1.60999	3.11904e-05	0.000811978
10393761	NM_027980	2310003H01Rik	RIKEN cDNA 2310003H01 gene	323.198	200.767	27.6535	44.2412	1.60982	0.00527781	0.0140149
10548785	NM_001166630	Dynlt1c	dynein light chain Tctex-type 1C	3289.07	2043.69	595.034	382.427	1.60937	0.0162594	0.0289002
10535938	NM_133898	N4bp2l1	NEDD4 binding protein 2-like 1	223.637	138.963	41.9911	13.211	1.60933	0.0224376	0.0355141
10462521	NM_008960	Pten	phosphatase and tensin homolog	5733.35	3564.07	379.991	233.842	1.60865	0.000198274	0.00214835
10478897	NM_011201	Ptpn1	protein tyrosine phosphatase	753.464	468.407	74.8467	99.1406	1.60857	0.00448208	0.0127575
10467730	NM_198108	Morn4	MORN repeat containing 4	1787.15	1111.12	575.299	295.679	1.60842	0.0973237	0.0992483
10433963	NM_026940	Ydjc	YdjC homolog (bacterial)	242.351	150.729	51.7347	24.4786	1.60786	0.0298504	0.043301
10500009	NM_053257	Rpl31	ribosomal protein L31	3613.31	2247.69	381.479	178.847	1.60756	0.00234482	0.00871769
10554945	NM_028243	Prcp	prolylcarboxypeptidase (angiotensinase C)	1149.02	714.833	170.388	149.555	1.6074	0.00893583	0.0196395
10538755	NM_007958	Smarcad1	SWI	524.649	326.441	117.674	82.1514	1.60718	0.0368572	0.0501882
10355960	NM_009129	Scg2	secretogranin II	2582.35	1606.92	82.9587	101.972	1.60702	8.24882e-06	0.000441798
10541260	NM_001128151	Cecr2	cat eye syndrome chromosome region	110.275	68.7036	14.9667	6.62875	1.60508	0.00648863	0.0158497
10417147	NM_080556	Tm9sf2	transmembrane 9 superfamily member 2	2763.88	1722.13	126.902	252.628	1.60492	0.00120858	0.00589746
10356262	NM_033616	Csprs	component of Sp100-rs	117.938	73.4929	30.9767	8.50279	1.60476	0.0595791	0.0702405
10346668	NM_001037725	Fam117b	family with sequence similarity 117	1989.17	1239.68	267.103	113.43	1.60459	0.00645939	0.0158153
10523856	---			255.019	158.939	37.3133	33.9866	1.60451	0.00903757	0.0197851
10420457	NM_028643	Efha1	EF hand domain family A1	484.13	301.791	31.4503	79.5232	1.60419	0.0136124	0.0255145
10403413	NM_145360	Idi1	isopentenyl-diphosphate delta isomerase	1544.03	962.646	234.593	188.225	1.60394	0.00907594	0.0198379
10424349	NM_009270	Sqle	squalene epoxidase	3928.61	2449.69	329.05	476.115	1.60372	0.003104	0.0103228
10381776	NM_001038609	Mapt	microtubule-associated protein tau	1658.14	1034.05	283.884	118.237	1.60354	0.015284	0.0277389
10514658	NM_001025615	Ccdc50	coiled-coil domain containing 50	444.673	277.358	71.5121	25.8579	1.60325	0.0133194	0.0252198
10511226	NM_207223	Acap3	ArfGAP with coiled-coil	699.5	436.417	166.413	39.5682	1.60283	0.0471512	0.0597544
10603099	NM_010216	Figf	c-fos induced growth factor	183.052	114.24	21.6504	4.99473	1.60234	0.00626356	0.01555
10424400	NM_010849	Myc	myelocytomatosis oncogene	1429.28	892.227	505.642	82.8643	1.60193	0.122381	0.116457
10442739	NM_001197024	Unkl	unkempt-like (Drosophila)	369.138	230.511	40.1715	16.3978	1.60139	0.00315149	0.0104103
10361748	NM_027968	Fbxo30	F-box protein 30	811.525	506.791	104.839	94.3139	1.6013	0.0051014	0.0137297
10441422	NM_146073	Zdhhc14	zinc finger	1509.5	942.682	54.9695	44.333	1.60129	5.44958e-06	0.000339771
10456721	---			101.228	63.2209	32.25	32.0381	1.60117	0.145529	0.131646
10439642	NM_028756	Slc35a5	solute carrier family 35	2153.06	1344.89	89.0672	168.534	1.60092	0.000587136	0.00393024
10410877	NM_001081176	Polr3g	polymerase (RNA) III (DNA directed) polypeptide G	1435.54	896.932	232.389	157.901	1.6005	0.0109838	0.0222446
10490856	NM_178631	Ralyl	RALY RNA binding protein-like	1181.45	738.204	111.359	137.139	1.60043	0.00271253	0.00953723
10369704	NM_001079824	Hnrnph3	heterogeneous nuclear ribonucleoprotein H3	483.143	301.897	42.3989	55.5544	1.60036	0.00249793	0.00908081
10574641	NM_145604	D230025D16Rik	RIKEN cDNA D230025D16 gene	1448.28	905.089	127.147	92.6711	1.60015	0.000667217	0.00420992
10579012	NM_172753	Csgalnact1	chondroitin sulfate N-acetylgalactosaminyltransferase 1	407.071	254.442	50.154	41.4486	1.59986	0.0036759	0.011382
10556113	NM_001166410	Rbm3	RNA binding motif protein 3	1861.78	1163.88	507.019	404.051	1.59962	0.0770752	0.0845216
10581188	NM_028888	4931428F04Rik	RIKEN cDNA 4931428F04 gene	613.286	383.627	50.7366	37.7398	1.59865	0.000494823	0.00354524
10543145	NM_001164805	Thsd7a	thrombospondin	907.896	568.095	55.8661	119.065	1.59814	0.00560747	0.0145345
10374553	NM_153596	Tmem17	transmembrane protein 17	429.879	269.014	34.3929	31.4636	1.59798	0.000472803	0.00345262
10394843	---			2562.57	1604.29	313.503	140.45	1.59732	0.00450958	0.0128009
10449452	NM_010220	Fkbp5	FK506 binding protein 5	472.466	296.008	164.942	63.8921	1.59612	0.11893	0.114279
10504203	ENSMUST00000107984	4930578G10Rik	RIKEN cDNA 4930578G10 gene	148.674	93.16	39.6895	32.5717	1.5959	0.0755539	0.0833017
10529375	NM_010753	Mxd4	Max dimerization protein 4	673.081	421.786	157.952	35.5274	1.59579	0.0466954	0.0593207
10473760	NM_017368	Celf1	CUGBP	1059.35	663.981	121.789	68.8718	1.59546	0.00285627	0.00979929
10416700	NM_001013753	Pcdh17	protocadherin 17	664.272	416.381	116.531	75.0833	1.59535	0.0152821	0.0277476
10405757	NM_028079	2010111I01Rik	RIKEN cDNA 2010111I01 gene	522.362	327.443	56.8865	56.3341	1.59528	0.00279701	0.00967948
10357478	NM_053257	Rpl31	ribosomal protein L31	2060.23	1291.78	78.1407	200.218	1.59487	0.00224146	0.00848829
10547151	NM_011975	Rpl27a	ribosomal protein L27A	1671.32	1048.11	126.072	74.7865	1.59459	0.000417274	0.00321282
10498076	NM_001004176	Maml3	mastermind like 3 (Drosophila)	237.993	149.268	54.2648	7.6931	1.59439	0.0453299	0.0581878
10493798	NM_026416	S100a16	S100 calcium binding protein A16	924.706	580.071	600.478	134.763	1.59412	0.337514	0.234907
10392904	NM_176847	Ush1g	Usher syndrome 1G homolog (human)	323.806	203.128	97.5228	44.5787	1.5941	0.0843546	0.0902188
10549762	NM_146178	Ccdc106	coiled-coil domain containing 106	171.625	107.693	20.5254	18.0719	1.59365	0.00355624	0.0111645
10535213	NM_172277	Snx8	sorting nexin 8	309.253	194.119	30.2054	18.8934	1.59311	0.00128527	0.00609027
10399691	NM_010496	Id2	inhibitor of DNA binding 2	4581.79	2876.55	1580.95	315.311	1.59281	0.118024	0.11363
10419216	NM_019425	Gnpnat1	glucosamine-phosphate N-acetyltransferase 1	663.65	416.728	246.844	143.439	1.59253	0.146433	0.132234
10572378	NM_016685	Comp	cartilage oligomeric matrix protein	132.247	83.0479	18.8531	7.30445	1.59242	0.00889279	0.019581
10415187	NM_001024645	Lrrc16b	leucine rich repeat containing 16B	732.065	459.804	44.5188	45.636	1.59212	0.000141741	0.00179138
10439891	---			1575.58	989.644	62.9621	56.4058	1.59206	9.65058e-06	0.000482731
10515613	NM_011213	Ptprf	protein tyrosine phosphatase	2243.33	1409.59	268.135	158.892	1.59148	0.00330538	0.0106573
10440206	NM_019665	Arl6	ADP-ribosylation factor-like 6	1336.23	839.696	116.546	215.852	1.59133	0.0116169	0.0229754
10340282	---			848.349	533.234	142.852	162.244	1.59095	0.0272878	0.0407076
10453006	NM_001024806	Cebpz	CCAAT	294.28	184.994	39.9962	33.8053	1.59076	0.00621628	0.0154694
10480258	NM_001165941	Nsun6	NOL1	236.315	148.558	10.9203	30.0735	1.59072	0.00634158	0.0156646
10369276	NM_001033259	Ccdc109a	coiled-coil domain containing 109A	1349.18	848.275	122.236	76.8163	1.5905	0.000916548	0.00501759
10428827	NM_175212	Tmem65	transmembrane protein 65	2917.41	1834.33	238.166	166.099	1.59045	0.000502179	0.00357039
10595803	NM_011279	Rnf7	ring finger protein 7	1746.95	1098.41	624.656	518.523	1.59044	0.162883	0.142529
10405822	NM_053180	Cdk20	cyclin-dependent kinase 20	297.334	186.993	93.5594	34.9934	1.59008	0.0948314	0.0975041
10382980	NM_009304	Syngr2	synaptogyrin 2	634.181	398.904	106.184	47.1789	1.58981	0.0144447	0.0266676
10488982	NM_170588	Cpne1	copine I	1156.68	727.603	77.1399	48.659	1.58972	0.000214246	0.00223447
10524555	NM_023556	Mvk	mevalonate kinase	1081.24	680.431	286.551	107.496	1.58905	0.06153	0.071851
10540952	NM_031177	Ift122	intraflagellar transport 122 homolog (Chlamydomonas)	569.829	358.708	35.3816	76.9515	1.58856	0.00659952	0.0160269
10435963	NM_026402	Atg3	autophagy-related 3 (yeast)	1320.02	831.175	128.724	200.832	1.58814	0.00895253	0.0196556
10402195	NM_028924	Tc2n	tandem C2 domains	189.727	119.531	66.1212	40.0485	1.58727	0.129761	0.121514
10471337	NM_145145	Pomt1	protein-O-mannosyltransferase 1	512.702	323.031	52.3236	57.561	1.58716	0.00284596	0.00977597
10466441	NM_173028	Vps13a	vacuolar protein sorting 13A (yeast)	996.446	628.17	134.54	92.7739	1.58627	0.00545457	0.0142755
10474002	NM_007699	Chrm4	cholinergic receptor	442.018	278.738	87.5434	48.6254	1.58578	0.024611	0.0378777
10356333	NR_002851	Snord82	small nucleolar RNA	676.726	426.8	102.764	248.271	1.58558	0.136383	0.126061
10450519	NM_001163763	Tcf19	transcription factor 19	442.13	278.877	162.618	17.9931	1.5854	0.137725	0.126811
10502191	NM_025509	Ostc	oligosaccharyltransferase complex subunit	2213.84	1396.42	170.685	199.796	1.58537	0.000873483	0.00490066
10458033	NM_133774	Stard4	StAR-related lipid transfer (START) domain containing 4	938.885	592.308	113.699	115.477	1.58513	0.00522434	0.0139216
10532896	NM_181075	2610524H06Rik	RIKEN cDNA 2610524H06 gene	933.6	589.032	51.3331	163.403	1.58497	0.0196062	0.0327056
10461547	NM_181403	Vps37c	vacuolar protein sorting 37C (yeast)	1055.27	665.87	261.413	179.577	1.58479	0.054622	0.0660843
10476326	NM_138651	Cds2	CDP-diacylglycerol synthase (phosphatidate cytidylyltransferase) 2	8099.91	5111.69	219.624	253.17	1.58458	2.40717e-06	0.000228786
10546706	NM_019743	Rybp	RING1 and YY1 binding protein	1094.9	690.996	193.137	134.357	1.58453	0.016662	0.0293721
10459866	NM_001171010	Slc14a1	solute carrier family 14 (urea transporter)	104.451	65.9389	15.8249	2.77979	1.58405	0.0150431	0.0274628
10458569	NM_008173	Nr3c1	nuclear receptor subfamily 3	603.255	380.844	106.933	70.8384	1.584	0.0167511	0.0294918
10466248	NM_001025307	Stx3	syntaxin 3	326.062	205.875	73.9342	8.51419	1.58379	0.0464711	0.0591437
10546113	NM_016906	Sec61a1	Sec61 alpha 1 subunit (S. cerevisiae)	4314.96	2724.65	178.339	350.22	1.58368	0.000790586	0.00463153
10480477	NM_011040	Pax8	paired box gene 8	185.8	117.325	14.5214	11.1449	1.58363	0.000398006	0.00309297
10480423	NM_001077190	Abi1	abl-interactor 1	2130.17	1345.14	76.2791	99.1916	1.58361	2.50369e-05	0.000735387
10451860	NM_028370	Pot1b	protection of telomeres 1B	170.353	107.598	38.3705	23.1552	1.58324	0.0385722	0.0517975
10491599	NM_172679	4932438A13Rik	RIKEN cDNA 4932438A13 gene	962.256	607.817	141.849	98.7374	1.58313	0.00808353	0.0183705
10362861	NM_172938	Scml4	sex comb on midleg-like 4 (Drosophila)	326.96	206.608	31.2217	17.4634	1.58252	0.00138609	0.00634837
10413461	NM_177814	Erc2	ELKS	1331.34	841.474	157.574	85.6053	1.58215	0.0035409	0.0111415
10566543	NM_001162943	Dchs1	dachsous 1 (Drosophila)	152.012	96.0924	13.5835	6.53153	1.58194	0.00129795	0.00611567
10426898	NM_001002900	Higd1c	HIG1 domain family	135.697	85.786	11.5799	5.03929	1.5818	0.00125402	0.00601727
10381211	NM_013792	Naglu	alpha-N-acetylglucosaminidase (Sanfilippo disease IIIB)	238.162	150.574	73.4052	22.1883	1.58169	0.0929386	0.0961259
10369295	NM_025514	Anapc16	anaphase promoting complex subunit 16	1527.61	966.178	216.791	179.061	1.58108	0.00770502	0.0177713
10446312	NM_001081653	Cntnap5c	contactin associated protein-like 5C	237.713	150.375	31.6401	7.52345	1.5808	0.00955342	0.0203595
10500204	NM_007899	Ecm1	extracellular matrix protein 1	202.687	128.252	61.0097	13.0383	1.58038	0.0898458	0.094092
10368888	NM_019740	Foxo3	forkhead box O3	861.533	545.18	24.1335	74.1306	1.58027	0.00187729	0.00759831
10450242	NM_009780	C4b	complement component 4B (Childo blood group)	175.023	110.806	38.2387	17.416	1.57955	0.0355074	0.048868
10494795	NM_178777	Nhlh2	nescient helix loop helix 2	114.453	72.4634	14.5985	12.466	1.57946	0.00497147	0.013537
10466423	NM_198019	Cep78	centrosomal protein 78	595.861	377.329	50.7771	54.634	1.57915	0.00111236	0.00562852
10386916	NM_198861	BC046404	cDNA sequence BC046404	246.239	155.945	21.7764	21.1945	1.57902	0.00101688	0.00532603
10503123	NM_026534	Ubxn2b	UBX domain protein 2B	911.882	577.512	82.3213	52.0574	1.57899	0.000948581	0.00511255
10455292	ENSMUST00000096572	2900055J20Rik	RIKEN cDNA 2900055J20 gene	1351.23	855.868	115.884	74.9722	1.57878	0.000728564	0.00441045
10379740	NM_145432	Heatr6	HEAT repeat containing 6	1122.25	710.854	45.9288	67.0179	1.57873	0.000113604	0.00159504
10471978	NM_172663	Epc2	enhancer of polycomb homolog 2 (Drosophila)	775.487	491.361	184.876	68.8582	1.57824	0.0475892	0.0601726
10578324	NM_001005863	Mtus1	mitochondrial tumor suppressor 1	1127.52	714.459	81.141	55.4764	1.57815	0.000292499	0.00262182
10463173	NM_023740	Zdhhc16	zinc finger	447.23	283.396	122.426	70.2574	1.57811	0.070302	0.0791087
10501567	NM_001038696	Rnpc3	RNA-binding region (RNP1	640.753	406.359	379.345	71.3724	1.57681	0.306242	0.220338
10347748	NM_028817	Acsl3	acyl-CoA synthetase long-chain family member 3	800.016	507.369	111.617	97.9661	1.57679	0.00787353	0.0180306
10411306	NM_012048	Polk	polymerase (DNA directed)	368.938	234.018	56.8819	40.2011	1.57653	0.0100992	0.0211398
10602090	NM_174875	Atg4a	autophagy-related 4A (yeast)	518.755	329.234	17.4116	59.3667	1.57564	0.00544263	0.0142577
10584901	NM_001081270	Dscaml1	Down syndrome cell adhesion molecule-like 1	135.342	85.9324	19.4067	10.2403	1.57498	0.00798767	0.0182021
10405236	NM_027324	Sfxn1	sideroflexin 1	1439.39	914.061	149.798	137.944	1.57472	0.00213862	0.00820296
10444932	NM_001146711	2310014H01Rik	RIKEN cDNA 2310014H01 gene	370.959	235.597	30.3372	47.1649	1.57455	0.00447721	0.0127567
10571922	NM_175089	Nek1	NIMA (never in mitosis gene a)-related expressed kinase 1	1307.13	830.182	387.42	161.661	1.57452	0.0852774	0.0908567
10376496	NM_178659	Jmjd4	jumonji domain containing 4	444.069	282.062	56.8575	31.0224	1.57437	0.00502733	0.013627
10343796	---			215.157	136.687	125.024	33.7267	1.57408	0.302269	0.218345
10426909	NM_134093	Letmd1	LETM1 domain containing 1	1951.4	1239.95	420.974	170.938	1.57377	0.0355774	0.0489321
10546430	NM_175314	Adamts9	a disintegrin-like and metallopeptidase (reprolysin type) with thrombospondin type 1 motif	673.107	427.709	194.127	34.8907	1.57375	0.0834916	0.0896631
10556005	NM_010562	Ilk	integrin linked kinase	2742.61	1743.15	668.331	299.673	1.57336	0.0503114	0.0624055
10429859	NM_153122	Oplah	5-oxoprolinase (ATP-hydrolysing)	498.311	316.956	34.7057	38.0295	1.57218	0.00042424	0.00324849
10607774	NM_029730	Mospd2	motile sperm domain containing 2	562.813	358.034	95.424	86.0307	1.57195	0.0191681	0.0322908
10372121	NM_001033332	Tmtc3	transmembrane and tetratricopeptide repeat containing 3	730.502	464.978	99.3275	107.294	1.57105	0.0110515	0.0223114
10574157	NM_001033207	Nlrc5	NLR family	139.174	88.5878	26.5482	7.57197	1.57103	0.0272669	0.0407055
10375485	---			330.163	210.175	40.2177	41.9148	1.5709	0.00616145	0.0153972
10345046	NM_027974	Efhc1	EF-hand domain (C-terminal) containing 1	363.426	231.38	61.5424	39.5743	1.57069	0.01478	0.027101
10529895	NM_024236	Qdpr	quinoid dihydropteridine reductase	2893.63	1842.59	178.038	256.53	1.57042	0.000840603	0.00477389
10361754	NM_010146	Epm2a	epilepsy	590.626	376.167	59.7319	57.0476	1.57012	0.0020418	0.00795951
10369752	NM_178678	Lrrtm3	leucine rich repeat transmembrane neuronal 3	1004.79	640.115	133.692	65.4124	1.5697	0.00644218	0.0157963
10605328	NM_025473	Fam3a	family with sequence similarity 3	521.743	332.594	47.974	38.7829	1.56871	0.00100963	0.00529139
10514713	NM_146254	Wdr78	WD repeat domain 78	241.508	153.99	39.0032	19.0046	1.56833	0.0132592	0.0251516
10392261	NM_025481	Smurf2	SMAD specific E3 ubiquitin protein ligase 2	1043.33	665.335	222.713	136.302	1.56812	0.034213	0.0474935
10429329	NM_153178	Eif2c2	eukaryotic translation initiation factor 2C	1661.72	1059.7	137.296	39.8423	1.5681	0.00191224	0.0076618
10431656	NM_053257	Rpl31	ribosomal protein L31	1351.36	861.786	74.7563	137.532	1.56809	0.00201528	0.00789664
10459452	ENSMUST00000068927	A330084C13Rik	RIKEN cDNA A330084C13 gene	244.201	155.776	33.4627	7.81157	1.56764	0.0109804	0.0222484
10604451	NM_145951	Enox2	ecto-NOX disulfide-thiol exchanger 2	302.121	192.747	17.9794	27.3124	1.56745	0.000975501	0.00521057
10517436	NM_025411	1110049F12Rik	RIKEN cDNA 1110049F12 gene	613.93	391.724	72.35	63.1975	1.56725	0.00376113	0.0115051
10397633	NM_201518	Flrt2	fibronectin leucine rich transmembrane protein 2	302.467	193.075	73.2653	47.7869	1.56657	0.0529033	0.0645566
10526038	NM_011846	Mmp17	matrix metallopeptidase 17	195.771	125.029	38.8332	12.1867	1.56581	0.0303195	0.0437914
10512867	NM_172304	Tex10	testis expressed gene 10	831.882	531.387	33.3375	103.158	1.56549	0.00691162	0.0165301
10351380	NM_001164528	Ildr2	immunoglobulin-like domain containing receptor 2	208.11	132.965	30.24	10.1327	1.56516	0.011384	0.0226704
10478772	NM_001085495	Arfgef2	ADP-ribosylation factor guanine nucleotide-exchange factor 2 (brefeldin A-inhibited)	2227.03	1422.9	65.823	80.2717	1.56514	6.31517e-06	0.000371812
10451907	NM_013664	Sh3gl1	SH3-domain GRB2-like 1	630.988	403.409	87.7878	76.3776	1.56414	0.00817868	0.0185062
10482301	NM_178778	Scai	suppressor of cancer cell invasion	607.966	388.7	96.0012	58.6622	1.5641	0.0115856	0.0229406
10513592	NM_023597	Wdr31	WD repeat domain 31	185.634	118.703	32.6634	28.6801	1.56386	0.0221421	0.0352871
10340168	---			862.394	551.546	121.908	113.984	1.56359	0.00987382	0.020835
10584057	NM_001115130	Zbtb44	zinc finger and BTB domain containing 44	1185.38	758.444	205.175	56.978	1.56292	0.0212314	0.0343602
10411235	NM_027711	Iqgap2	IQ motif containing GTPase activating protein 2	243.71	155.954	84.4978	13.1942	1.5627	0.128232	0.120501
10480145	NM_009105	Rsu1	Ras suppressor protein 1	6098.63	3903.01	411.896	363.131	1.56255	0.000220511	0.00226587
10361771	NM_009538	Plagl1	pleiomorphic adenoma gene-like 1	1513.08	968.613	285.013	55.0816	1.56211	0.0292133	0.0426807
10422185	NM_026047	Rnf219	ring finger protein 219	734.063	470.126	46.4734	76.3847	1.56142	0.00204835	0.00797389
10539574	NR_002702	Npm3-ps1	nucleoplasmin 3	179.547	114.995	17.5813	16.4006	1.56135	0.00173866	0.00727695
10558903	NM_011528	Taldo1	transaldolase 1	528.099	338.264	73.2074	31.3933	1.5612	0.00850468	0.0189765
10338601	---			2359.05	1511.45	522.228	214.993	1.56078	0.0400237	0.0532333
10408557	NM_025429	Serpinb1a	serine (or cysteine) peptidase inhibitor	1150.57	737.363	483.455	261.284	1.56039	0.197708	0.16274
10406676	NM_172589	Lhfpl2	lipoma HMGIC fusion partner-like 2	664.567	426.046	92.2505	89.3657	1.55985	0.00993868	0.0209349
10360666	BC120654	6330403A02Rik	RIKEN cDNA 6330403A02 gene	145.245	93.1261	21.1702	10.5419	1.55966	0.00936011	0.0201584
10542911	NM_010156	Samd9l	sterile alpha motif domain containing 9-like	258.011	165.457	95.8602	39.2049	1.55938	0.14884	0.133715
10486107	NM_009273	Srp14	signal recognition particle 14	1317.43	844.955	42.7285	97.4446	1.55917	0.000781486	0.00459432
10404359	NM_153546	Mboat1	membrane bound O-acyltransferase domain containing 1	157.634	101.114	47.1371	16.1234	1.55897	0.0913722	0.0950589
10400844	NM_133198	Pygl	liver glycogen phosphorylase	502.62	322.435	40.4252	40.8356	1.55883	0.000763959	0.00453275
10385297	NM_010250	Gabra1	gamma-aminobutyric acid (GABA) A receptor	2488.6	1596.52	262.162	269.869	1.55876	0.00319193	0.0104693
10431140	NM_001163145	1810041L15Rik	RIKEN cDNA 1810041L15 gene	1242.81	797.317	76.6592	104.159	1.55874	0.000661142	0.00419058
10567995	NM_019738	Nupr1	nuclear protein 1	138.433	88.8188	9.72556	17.1225	1.5586	0.0045703	0.0129337
10554667	NM_177695	Tmc3	transmembrane channel-like gene family 3	114.99	73.8166	14.2644	10.3949	1.55779	0.00434702	0.0125181
10538373	NM_030024	Prr15	proline rich 15	122.118	78.4095	31.6772	11.1919	1.55743	0.0641516	0.0740839
10595000	NM_016963	Tmod3	tropomodulin 3	403.655	259.181	89.4449	28.0074	1.55742	0.0426647	0.0556646
10338633	---			297.471	191.005	187.037	54.6369	1.55739	0.34379	0.237927
10455647	NM_134131	Tnfaip8	tumor necrosis factor	100.325	64.4234	19.2928	11.732	1.55728	0.0248712	0.0381868
10445702	NM_198421	Usp49	ubiquitin specific peptidase 49	241.982	155.48	12.4345	22.7889	1.55635	0.00152794	0.00672167
10399505	NM_015764	Greb1	gene regulated by estrogen in breast cancer protein	289.184	185.831	80.9262	27.6439	1.55616	0.0783542	0.085576
10477147	NM_001159551	H13	histocompatibility 13	3652.57	2347.46	128.63	93.4136	1.55597	7.22836e-06	0.00041088
10408225	NM_178208	Hist1h4c	histone cluster 1	188.004	120.828	32.5907	8.14768	1.55597	0.0224602	0.0355364
10434302	NM_029436	Klhl24	kelch-like 24 (Drosophila)	1859.6	1195.44	353.477	116.911	1.55558	0.0273005	0.0407047
10460085	NM_023149	Cndp2	CNDP dipeptidase 2 (metallopeptidase M20 family)	1124.15	722.707	339.174	200.338	1.55546	0.09865	0.100234
10574350	NM_008609	Mmp15	matrix metallopeptidase 15	1353.56	870.269	386.363	85.4332	1.55534	0.0846834	0.0905009
10599962	NM_001081354	Mamld1	mastermind-like domain containing 1	1263.5	812.408	102.996	7.17322	1.55525	0.00303957	0.0101978
10584095	NM_172766	Nfrkb	nuclear factor related to kappa B binding protein	430.927	277.094	56.9932	37.3015	1.55517	0.00580592	0.0148462
10577586	NM_001122820	Ap3m2	adaptor-related protein complex 3	930.019	598.065	167.964	122.636	1.55505	0.0212347	0.0343588
10492522	NM_001113421	Schip1	schwannomin interacting protein 1	1971.48	1267.8	42.7284	133.517	1.55504	0.000916298	0.0050228
10506571	NM_053272	Dhcr24	24-dehydrocholesterol reductase	6110.33	3930.46	280.538	207.969	1.55461	2.91118e-05	0.00078929
10454039	NM_008378	Impact	imprinted and ancient	2883.41	1855.85	167.145	148.036	1.55369	0.000100804	0.00149577
10593213	NM_144948	Rbm7	RNA binding motif protein 7	429.968	276.854	71.4312	66.2109	1.55305	0.0201167	0.0331796
10497399	NM_001122759	Pde7a	phosphodiesterase 7A	420.508	270.87	56.6911	38.7549	1.55243	0.00638119	0.0157159
10539472	NM_019542	Nagk	N-acetylglucosamine kinase	1493.78	962.386	313.557	129.752	1.55216	0.0351434	0.0484628
10502522	NM_011828	Hs2st1	heparan sulfate 2-O-sulfotransferase 1	795.354	512.464	57.0994	77.4269	1.55202	0.00143894	0.00648028
10363894	NM_027184	Ipmk	inositol polyphosphate multikinase	1149.93	741.094	113.637	74.1077	1.55167	0.00161956	0.00697411
10601152	NM_172932	Nlgn3	neuroligin 3	1905.47	1228.26	96.949	173.745	1.55136	0.00132516	0.00620191
10599976	NM_001164190	Mtm1	X-linked myotubular myopathy gene 1	179.48	115.709	19.8963	10.6848	1.55113	0.0031566	0.0104189
10393594	NM_001039167	D11Bwg0517e	DNA segment	3532.54	2277.62	218.841	219.094	1.55098	0.000189257	0.00208582
10368534	NM_172495	Ncoa7	nuclear receptor coactivator 7	2947.02	1901.13	188.293	180.038	1.55014	0.000201392	0.0021625
10439268	NM_001013371	Dtx3l	deltex 3-like (Drosophila)	477.35	307.939	75.4375	45.9515	1.55014	0.0123774	0.0240076
10385511	NM_011190	Psme2	proteasome (prosome	406.739	262.394	115.976	57.5606	1.55011	0.0836113	0.0897109
10375650	NM_029004	Rasgef1c	RasGEF domain family	301.23	194.346	102.508	31.9652	1.54997	0.125631	0.118697
10589960	NM_028638	Gadl1	glutamate decarboxylase-like 1	148.978	96.1179	7.22845	10.2754	1.54995	0.000268743	0.00252824
10420320	NM_001014996	Cenpj	centromere protein J	112.854	72.8143	10.7043	9.91392	1.54989	0.00156046	0.00681091
10500333	NM_033596	Hist2h4	histone cluster 2	1478.38	954.007	233.914	181.613	1.54965	0.0134723	0.0253828
10378763	NM_177367	Gemin4	gem (nuclear organelle) associated protein 4	165.79	107.019	9.26637	11.1359	1.54916	0.00022193	0.00227206
10536949	NM_177204	Fam40b	family with sequence similarity 40	570.893	368.61	78.9096	58.4911	1.54877	0.00740682	0.0172647
10489958	NM_001081134	Kcng1	potassium voltage-gated channel	487.061	314.483	69.2935	56.5478	1.54877	0.00903191	0.0197831
10483023	ENSMUST00000028347	Rbms1	RNA binding motif	1626.45	1050.26	265.792	130.336	1.54861	0.0149471	0.0273534
10587488	NM_175213	Mei4	meiosis-specific	146.372	94.5428	19.4492	6.47872	1.54821	0.00909557	0.0198704
10497105	NM_024194	Lrrc40	leucine rich repeat containing 40	909.794	587.713	81.1784	154.463	1.54803	0.0167771	0.0295189
10605113	NM_008478	L1cam	L1 cell adhesion molecule	5832.43	3768	250.015	305.902	1.54789	5.77083e-05	0.00109551
10565288	NM_133722	Fam108c	family with sequence similarity 108	1088.55	703.308	168.573	21.7736	1.54775	0.0187178	0.0317114
10434446	NM_139293	Ece2	endothelin converting enzyme 2	1265.74	817.975	45.5167	82.4339	1.5474	0.000311666	0.00272065
10525439	NM_011026	P2rx4	purinergic receptor P2X	1180.33	762.836	125.459	80.7436	1.54729	0.00232924	0.00868296
10571399	NM_178395	Zdhhc2	zinc finger	5992.25	3873.63	345.589	565.528	1.54693	0.00142217	0.006429
10364728	NM_023431	Mum1	melanoma associated antigen (mutated) 1	281.095	181.802	52.0546	28.0914	1.54616	0.0228315	0.0359469
10362511	NM_010359	Gstm3	glutathione S-transferase	266.735	172.599	24.474	21.7128	1.54541	0.00125955	0.00602994
10375216	NM_145962	Pank3	pantothenate kinase 3	1028.94	665.865	112.492	110.362	1.54527	0.00366505	0.011361
10351269	NM_029115	4930455F23Rik	RIKEN cDNA 4930455F23 gene	520.567	336.885	57.2829	89.4938	1.54524	0.0175008	0.0303198
10554013	NM_001081163	Chsy1	chondroitin sulfate synthase 1	1031.84	667.864	189.365	85.7554	1.54498	0.0231265	0.036302
10584067	NM_001115130	Zbtb44	zinc finger and BTB domain containing 44	293.935	190.261	65.1899	27.2438	1.5449	0.0423932	0.0553796
10559837	NR_003555	Vmn2r29	vomeronasal 2	127.574	82.5781	13.0077	10.5601	1.54488	0.00194856	0.00776635
10584259	NM_183171	Fez1	fasciculation and elongation protein zeta 1 (zygin I)	5030.69	3256.68	654.564	480.587	1.54473	0.00577784	0.0148062
10410975	NM_145453	Zcchc9	zinc finger	573.572	371.344	46.1354	64.5735	1.54458	0.00298558	0.0100774
10418193	NM_207229	Plac9	placenta specific 9	102.17	66.148	48.043	17.7586	1.54457	0.235746	0.184161
10527133	NM_178398	Wipi2	WD repeat domain	1685.65	1091.51	47.4473	60.3733	1.54433	7.31498e-06	0.00041262
10531195	NM_177872	Adamts3	a disintegrin-like and metallopeptidase (reprolysin type) with thrombospondin type 1 motif	300.228	194.439	83.338	73.2411	1.54407	0.105945	0.105516
10502335	NM_001033350	Bank1	B-cell scaffold protein with ankyrin repeats 1	104.092	67.4383	3.71047	10.7415	1.54351	0.00385147	0.0116746
10595327	NM_001081216	Phip	pleckstrin homology domain interacting protein	650.342	421.442	164.409	80.4515	1.54313	0.0615971	0.0718791
10370025	NM_011418	Smarcb1	SWI	1330.98	862.608	212.975	119.504	1.54297	0.0135884	0.0254752
10370180	NM_146007	Col6a2	collagen	241.954	156.865	33.2508	7.91589	1.54244	0.0120177	0.0235175
10339905	---			120.27	78.0107	50.0611	24.8888	1.54171	0.198787	0.163451
10405179	NM_010101	S1pr3	sphingosine-1-phosphate receptor 3	4369.4	2834.99	787.643	355.66	1.54124	0.0221458	0.0352864
10559207	NM_019391	Lsp1	lymphocyte specific 1	149.041	96.7072	17.4107	11.9347	1.54115	0.00360418	0.0112727
10546454	NM_175314	Adamts9	a disintegrin-like and metallopeptidase (reprolysin type) with thrombospondin type 1 motif	340.939	221.229	134.949	20.096	1.54112	0.173657	0.148885
10570388	NM_001143671	Fam70b	family with sequence similarity 70	154.583	100.344	14.2056	9.69632	1.54053	0.00119171	0.00585275
10513320	NM_025968	Ptgr1	prostaglandin reductase 1	258.85	168.141	30.8054	48.2432	1.53948	0.0241746	0.037399
10519007	NM_026388	Tprgl	transformation related protein 63 regulated like	5280.71	3430.29	173.843	176.758	1.53943	5.70289e-06	0.000350131
10530310	NM_001164806	Bend4	BEN domain containing 4	397.574	258.267	24.257	23.2297	1.53939	0.00016791	0.00195911
10595094	NM_027150	2310046A06Rik	RIKEN cDNA 2310046A06 gene	203.452	132.185	39.9778	47.1469	1.53914	0.061764	0.0720336
10574456	NM_001037841	Cklf	chemokine-like factor	140.88	91.5323	37.4006	14.6601	1.53913	0.0715335	0.0801383
10602739	NM_019736	Acot9	acyl-CoA thioesterase 9	1274.75	828.5	150.782	163.385	1.53862	0.0070968	0.016838
10517383	NM_028995	Nipal3	NIPA-like domain containing 3	3169.14	2059.73	243.365	291.89	1.53862	0.00124439	0.00599171
10370544	NM_001004362	2610008E11Rik	RIKEN cDNA 2610008E11 gene	363.597	236.326	64.4878	51.6678	1.53854	0.022991	0.0361299
10603485	NM_007898	Ebp	phenylalkylamine Ca2+ antagonist (emopamil) binding protein	1462.54	950.719	117.764	209.566	1.53835	0.00910809	0.019877
10408085	NM_178184	Hist1h2an	histone cluster 1	948.342	616.528	125.483	60.869	1.5382	0.00728607	0.0170929
10359713	NM_145512	Sft2d2	SFT2 domain containing 2	504.429	328.177	69.1406	148.841	1.53706	0.0943702	0.0971376
10572880	NM_011622	Tom1	target of myb1 homolog (chicken)	1986.69	1292.54	109.41	120.605	1.53705	0.000150062	0.00185173
10360957	NM_172650	Kctd3	potassium channel tetramerisation domain containing 3	790.691	514.555	91.0333	97.7736	1.53665	0.00618675	0.0154373
10374821	NM_134034	Smek2	SMEK homolog 2	833.77	542.696	228.276	126.797	1.53635	0.0797703	0.0867484
10590191	NM_026236	Wdr48	WD repeat domain 48	2630.8	1712.38	256.115	145.846	1.53634	0.00185558	0.00756171
10393628	NM_172443	Tbc1d16	TBC1 domain family	508.382	330.928	42.1302	26.3564	1.53623	0.000810972	0.00469173
10370376	NM_008826	Pfkl	phosphofructokinase	990.658	644.867	173.332	103.474	1.53622	0.0193433	0.0324095
10579341	NM_183170	Mpv17l2	MPV17 mitochondrial membrane protein-like 2	1577.32	1026.96	181.145	149.044	1.53591	0.00368825	0.0114075
10370072	NM_133182	Prmt2	protein arginine N-methyltransferase 2	1146.44	746.508	209.317	88.9079	1.53574	0.0240333	0.0372632
10511665	NM_178617	Necab1	N-terminal EF-hand calcium binding protein 1	5473.84	3564.46	872.433	468.489	1.53567	0.0139975	0.0260146
10400334	NM_053257	Rpl31	ribosomal protein L31	577.716	376.306	76.8406	109.82	1.53523	0.0273552	0.0407644
10553913	NM_028626	Mcee	methylmalonyl CoA epimerase	2712.23	1766.81	436.491	299.916	1.5351	0.0144547	0.0266625
10482509	NM_001141981	Rbm43	RNA binding motif protein 43	755.15	492.006	105.388	37.4727	1.53484	0.0108572	0.02209
10603746	NM_172778	Maob	monoamine oxidase B	174.329	113.612	22.1071	38.948	1.53443	0.0445116	0.0573311
10564849	BC031379	2610034B18Rik	RIKEN cDNA 2610034B18 gene	1389.76	905.804	251.84	165.481	1.53429	0.0224974	0.0355751
10392183	NM_023913	Ern1	endoplasmic reticulum (ER) to nucleus signalling 1	304.669	198.643	44.4798	19.086	1.53375	0.0114244	0.0227184
10548761	NM_013546	Hebp1	heme binding protein 1	174.725	113.939	45.1138	13.2016	1.53349	0.0694005	0.0784005
10374478	NM_021372	Sertad2	SERTA domain containing 2	551.694	359.838	31.791	23.6395	1.53317	0.000111381	0.00157441
10393648	NM_018822	Sgsh	N-sulfoglucosamine sulfohydrolase (sulfamidase)	315.812	205.987	29.0558	12.473	1.53317	0.00211644	0.00816285
10478048	NM_008489	Lbp	lipopolysaccharide binding protein	121.853	79.4781	22.3336	10.4901	1.53316	0.0238934	0.037129
10386921	NM_133208	Zfp287	zinc finger protein 287	316.539	206.483	27.6804	15.4488	1.533	0.00121532	0.00591653
10603478	NM_172478	Tbc1d25	TBC1 domain family	885.734	577.819	173.07	69.9596	1.53289	0.030472	0.0439356
10388648	NM_172945	Ankrd13b	ankyrin repeat domain 13b	771.353	503.285	105.591	71.1641	1.53264	0.00752263	0.0174567
10596379	NM_052835	Rpl10	ribosomal protein 10	3909.85	2552.85	334.793	121.374	1.53156	0.00200222	0.00787875
10358555	NM_001024720	Hmcn1	hemicentin 1	152.848	99.8227	46.6164	5.8537	1.5312	0.106492	0.105871
10515983	NM_028457	Dem1	defects in morphology 1 homolog (S. cerevisiae)	142.315	92.945	23.7985	9.48799	1.53118	0.0188499	0.0318834
10481383	NM_001008498	Wdr34	WD repeat domain 34	463.189	302.597	22.5073	43.299	1.53071	0.00179003	0.00740291
10598798	NM_009483	Kdm6a	4lysine (K)-specific demethylase 6A	740.321	483.698	219.018	136.488	1.53054	0.103125	0.103521
10549588	NM_029767	Rps9	ribosomal protein S9	1453.87	950.107	205.136	61.6361	1.53022	0.0124556	0.0241033
10541246	NM_008359	Il17ra	interleukin 17 receptor A	121.252	79.3403	19.0707	6.19741	1.52826	0.0170464	0.0298107
10589087	NM_008924	Prkar2a	protein kinase	2477.85	1621.36	102.956	135.13	1.52826	8.39929e-05	0.00133664
10374035	NM_013842	Xbp1	X-box binding protein 1	2683.23	1755.86	221.895	75.8025	1.52816	0.00191867	0.00766918
10543944	NM_008098	Mtpn	myotrophin	2593.73	1697.4	166.265	254.713	1.52806	0.00179197	0.00740361
10364502	NM_023128	Palm	paralemmin	1034.55	677.163	261.909	120.676	1.52777	0.0650729	0.0748581
10526772	NM_178612	Cnpy4	canopy 4 homolog (zebrafish)	273.256	178.893	50.1213	33.7889	1.52748	0.0244612	0.0377166
10355141	NM_033563	Klf7	Kruppel-like factor 7 (ubiquitous)	5946.74	3893.81	468.942	217.648	1.52723	0.00106899	0.00550237
10426292	NM_001033441	Alg10b	asparagine-linked glycosylation 10 homolog B (yeast	973.48	637.444	52.6771	113.058	1.52716	0.0048384	0.0133399
10366774	NM_009635	Avil	advillin	4623.35	3029.78	405.271	372.587	1.52597	0.00119131	0.00585424
10575034	NM_001037809	Cdh3	cadherin 3	150.777	98.8081	43.4156	5.53794	1.52596	0.0953461	0.0978166
10569134	NM_016874	Deaf1	deformed epidermal autoregulatory factor 1 (Drosophila)	931.175	610.242	62.3009	46.6986	1.52591	0.000253655	0.00243847
10579554	NM_001029873	Unc13a	unc-13 homolog A (C. elegans)	2102.83	1378.1	225.144	23.5185	1.52588	0.0072271	0.0170167
10362941	NM_011156	Prep	prolyl endopeptidase	3865.11	2533.23	395.72	121.906	1.52576	0.00442125	0.0126533
10406663	NM_009712	Arsb	arylsulfatase B	1529.67	1002.64	143.158	61.2335	1.52564	0.0023494	0.00872695
10561004	NM_010155	Erf	Ets2 repressor factor	580.446	380.563	104.84	120.77	1.52523	0.0473251	0.0599384
10490502	NM_178254	Tcfl5	transcription factor-like 5 (basic helix-loop-helix)	104.193	68.3316	20.7225	4.9916	1.52482	0.0369678	0.0502978
10412421	NM_028245	Zfp131	zinc finger protein 131	464.629	304.766	66.0539	56.5268	1.52454	0.0108043	0.0220145
10523297	NM_007635	Ccng2	cyclin G2	325.702	213.757	39.0893	52.9269	1.5237	0.0164353	0.0290953
10416541	NM_172813	Enox1	ecto-NOX disulfide-thiol exchanger 1	708.668	465.147	47.2201	28.7164	1.52354	0.00032803	0.00278775
10405576	NM_178674	Fbxl21	F-box and leucine-rich repeat protein 21	462.677	303.697	65.7614	72.1055	1.52349	0.017498	0.0303211
10381006	NM_178060	Thra	thyroid hormone receptor alpha	5293.33	3475.05	243.291	417.562	1.52324	0.000765418	0.00453497
10464045	NM_027976	Acsl5	acyl-CoA synthetase long-chain family member 5	1108.52	727.764	120.788	170.172	1.52318	0.0128497	0.0246208
10593130	NM_172257	Sidt2	SID1 transmembrane family	1465.82	962.508	119.232	41.0086	1.52292	0.00183847	0.00752503
10540795	NM_172161	Irak2	interleukin-1 receptor-associated kinase 2	249.049	163.546	11.6847	21.8538	1.52281	0.00137911	0.0063407
10435897	BC027231	BC027231	cDNA sequence BC027231	243.625	160.039	34.7104	23.5564	1.52229	0.00938658	0.0201582
10534102	NM_010368	Gusb	glucuronidase	272.874	179.279	25.1988	11.8826	1.52206	0.00201303	0.00789523
10557262	NM_146198	Slc5a11	solute carrier family 5 (sodium	123.388	81.0676	10.4541	9.46788	1.52204	0.000998381	0.00527211
10470788	NM_001113213	Odf2	outer dense fiber of sperm tails 2	457.578	300.637	66.9854	38.2338	1.52203	0.0106396	0.0218332
10343928	---			522.139	343.102	141.216	118.993	1.52182	0.101963	0.102751
10372988	NM_011391	Slc16a7	solute carrier family 16 (monocarboxylic acid transporters)	749.069	492.29	122.955	102.507	1.5216	0.0192451	0.0323554
10369738	NM_019812	Sirt1	sirtuin 1 (silent mating type information regulation 2	264.109	173.589	56.0429	37.314	1.52146	0.0414695	0.0544625
10508112	NM_138721	Lsm10	U7 snRNP-specific Sm-like protein LSM10	311.605	204.834	25.8563	34.5751	1.52126	0.00321269	0.0104962
10519420	NM_194462	Akap9	A kinase (PRKA) anchor protein (yotiao) 9	937.463	616.242	164.769	71.6038	1.52126	0.0223601	0.0354452
10561073	NM_177102	Tmem91	transmembrane protein 91	289.135	190.065	79.1803	36.0138	1.52124	0.0819696	0.0885637
10346747	NM_030013	Cyp20a1	cytochrome P450	803.691	528.377	94.6591	100.626	1.52106	0.00729125	0.0171003
10540233	NM_182808	Fam19a1	family with sequence similarity 19	1796.38	1181.75	458.352	130.36	1.52011	0.0704094	0.0791763
10360479	NM_001099637	Cep170	centrosomal protein 170	1836.42	1208.13	172.981	112.964	1.52005	0.00154862	0.00677339
10368782	NM_133999	Fig4	FIG4 homolog (S. cerevisiae)	2091.62	1377.25	29.6198	183.603	1.5187	0.00382524	0.0116331
10571114	NM_153592	Erlin2	ER lipid raft associated 2	710.438	468.018	68.1559	60.4298	1.51797	0.00187203	0.00759908
10589099	NM_029634	Ip6k2	inositol hexaphosphate kinase 2	491.443	323.893	63.5917	36.589	1.5173	0.00668065	0.0161675
10561712	NM_011464	Spint2	serine protease inhibitor	139.764	92.146	10.3083	13.0932	1.51677	0.00149308	0.00664528
10457007	NM_025861	Pqlc1	PQ loop repeat containing 1	436.274	287.637	73.7742	23.1312	1.51675	0.0225199	0.0356039
10462724	NM_001163635	Tnks2	tankyrase	1361.43	897.62	147.56	127.166	1.51671	0.00330538	0.0106614
10399254	NM_134046	Cenpo	centromere protein O	199.725	131.684	33.2258	13.9899	1.5167	0.0192499	0.0323438
10601598	BC027572	3110007F17Rik	RIKEN cDNA 3110007F17 gene	109.797	72.4103	14.1624	11.9614	1.51632	0.00725618	0.0170419
10542006	BC016429	D6Wsu163e	DNA segment	1176.74	776.067	85.3122	97.6204	1.51629	0.000882118	0.00491937
10553280	NM_008186	Gtf2h1	general transcription factor II H	721.761	476.092	28.456	72.4545	1.51601	0.00349535	0.0110356
10342352	---			217.741	143.628	47.7314	11.3297	1.51601	0.0494283	0.0616765
10381154	NM_009923	Cnp	2'	1621.74	1069.81	255.08	105.605	1.51591	0.0161594	0.0288021
10448192	---			258.64	170.639	36.0039	27.3643	1.51571	0.00922745	0.0200432
10431935	NM_178114	Amigo2	adhesion molecule with Ig like domain 2	915.525	604.242	128.049	200.689	1.51516	0.0465147	0.0591722
10356593	NM_019479	Hes6	hairy and enhancer of split 6 (Drosophila)	691.941	456.702	269.514	135.298	1.51508	0.186996	0.156326
10343603	---			214.901	141.963	136.78	29.5622	1.51378	0.367873	0.248903
10395259	NM_021524	Nampt	nicotinamide phosphoribosyltransferase	1153.53	762.16	142.164	160.114	1.5135	0.0108984	0.0221306
10338495	---			121.515	80.2929	18.7448	18.5023	1.5134	0.0203232	0.0333621
10469335	NM_011484	Stam	signal transducing adaptor molecule (SH3 domain and ITAM motif) 1	1892.55	1250.76	123.635	123.053	1.51312	0.000322584	0.0027725
10540507	NM_008210	H3f3a	H3 histone	828.576	547.813	175.179	141.002	1.51252	0.0485149	0.0609372
10382449	NM_021411	Rab37	RAB37	1053.17	696.355	236.476	114.228	1.51241	0.0488197	0.0611729
10531304	NM_016912	Cdkl2	cyclin-dependent kinase-like 2 (CDC2-related kinase)	912.95	603.897	107.461	88.3353	1.51177	0.00476472	0.0132021
10572097	NM_028182	Sh2d4a	SH2 domain containing 4A	101.624	67.2246	11.8493	6.77486	1.5117	0.00451576	0.0128054
10463739	NM_177342	Taf5	TAF5 RNA polymerase II	220.34	145.762	25.2766	29.5388	1.51164	0.00898996	0.0197067
10342053	---			5924.36	3919.5	1252.62	601.587	1.51151	0.0409033	0.0539735
10369176	NM_001033385	D630037F22Rik	RIKEN cDNA D630037F22 gene	445.268	294.72	34.7957	58.2902	1.51082	0.00713467	0.0169039
10399725	NM_009234	Sox11	SRY-box containing gene 11	479.692	317.549	121.719	82.8953	1.51061	0.075925	0.0835675
10449991	NM_207541	Zfp81	zinc finger protein 81	283.578	187.739	24.9216	30.7427	1.51049	0.00322019	0.0105084
10389087	NM_001164570	Rffl	ring finger and FYVE like domain containing protein	386.07	255.681	40.6246	15.0546	1.50997	0.00448466	0.0127605
10408610	NM_009450	Tubb2a	tubulin	4611.14	3054	364.649	244.422	1.50987	0.000706755	0.00434135
10478774	NM_001085495	Arfgef2	ADP-ribosylation factor guanine nucleotide-exchange factor 2 (brefeldin A-inhibited)	2028.23	1343.44	60.0233	151.362	1.50972	0.00119326	0.0058535
10341749	---			1995.69	1321.98	437.94	157.879	1.50962	0.047696	0.060262
10408118	NM_178186	Hist1h2ag	histone cluster 1	1590.33	1053.57	226.231	134.713	1.50947	0.0100208	0.0210601
10471550	BC075731	Rpl12	ribosomal protein L12	167.576	111.042	46.5108	15.2716	1.50912	0.088601	0.0932794
10347277	NM_008342	Igfbp2	insulin-like growth factor binding protein 2	173.755	115.175	6.00212	19.7086	1.50862	0.00671291	0.0162033
10593799	NM_001081341	Scaper	S phase cyclin A-associated protein in the ER	1464.56	970.969	184.684	110.87	1.50835	0.00619143	0.0154352
10578709	NM_028220	Wdr17	WD repeat domain 17	645.565	428.021	42.703	67.1469	1.50826	0.00264321	0.00938035
10568480	NM_001162855	Nsmce4a	non-SMC element 4 homolog A (S. cerevisiae)	612.022	405.784	60.2226	59.1872	1.50825	0.00275477	0.00962095
10452516	NM_001025572	Ankrd12	ankyrin repeat domain 12	1343.93	891.542	302.024	108.158	1.50742	0.0513969	0.0633382
10531201	NM_177872	Adamts3	a disintegrin-like and metallopeptidase (reprolysin type) with thrombospondin type 1 motif	169.683	112.572	47.5259	35.8217	1.50732	0.10705	0.106224
10478754	NM_001085495	Arfgef2	ADP-ribosylation factor guanine nucleotide-exchange factor 2 (brefeldin A-inhibited)	2520.75	1672.44	129.849	77.6597	1.50723	0.000111115	0.00157331
10364955	NM_022653	Thop1	thimet oligopeptidase 1	507.878	337.005	116.781	39.3822	1.50703	0.0552064	0.0666273
10452538	NM_001114098	1110012J17Rik	RIKEN cDNA 1110012J17 gene	772.38	512.568	31.7822	45.0294	1.50688	0.000149244	0.00184983
10485388	NM_178886	Ldlrad3	low density lipoprotein receptor class A domain containing 3	716.01	475.218	104.933	118.053	1.5067	0.0229329	0.0360591
10605319	NM_145405	Ubl4	ubiquitin-like 4	1530.89	1016.15	564.481	239.139	1.50656	0.167631	0.145254
10339290	---			389.616	258.644	31.442	63.6318	1.50638	0.0178777	0.0308065
10437712	NM_145931	Zc3h7a	zinc finger CCCH type containing 7 A	373.412	247.902	104.871	55.2141	1.50629	0.0932839	0.0963399
10540579	NM_026849	Mtmr14	myotubularin related protein 14	1443.76	958.65	165.318	102.249	1.50603	0.00413052	0.0121373
10409282	NM_013846	Ror2	receptor tyrosine kinase-like orphan receptor 2	497.706	330.544	43.0014	58.0528	1.50572	0.00441755	0.0126601
10414355	NM_178684	Mapk1ip1l	mitogen-activated protein kinase 1 interacting protein 1-like	2923.62	1941.88	238.617	146.758	1.50557	0.000922177	0.00503192
10596481	NM_001110271	Abhd14a	abhydrolase domain containing 14A	830.49	551.748	231.373	125.135	1.5052	0.0921773	0.0955752
10518108	NM_145402	Tmem51	transmembrane protein 51	162.306	107.831	22.4524	7.61511	1.50519	0.012223	0.0237966
10346562	NM_207653	Cflar	CASP8 and FADD-like apoptosis regulator	111.079	73.8082	13.2811	13.8091	1.50496	0.00809542	0.0183875
10492229	NM_016738	Rpl13	ribosomal protein L13	100.103	66.5196	26.9718	9.3808	1.50486	0.0833367	0.0895888
10508069	NM_008049	Ftl2	ferritin light chain 2	4001.03	2658.77	255.93	216.244	1.50484	0.000231625	0.00231182
10472022	NM_027990	Lypd6b	LY6	250.31	166.338	39.3645	26.0574	1.50483	0.0151897	0.0276399
10379820	NM_133360	Acaca	acetyl-Coenzyme A carboxylase alpha	915.288	608.294	85.1091	128.793	1.50468	0.0097564	0.0206656
10511703	NM_138952	Ripk2	receptor (TNFRSF)-interacting serine-threonine kinase 2	698.461	464.228	133.63	85.0286	1.50456	0.0309425	0.0443765
10440993	NM_001081549	Rcan1	regulator of calcineurin 1	1623.3	1079.07	109.639	241.754	1.50435	0.0135438	0.0254601
10340202	---			325.948	216.702	44.7526	32.9247	1.50413	0.00910385	0.0198781
10378013	NM_027186	Rpain	RPA interacting protein	285.84	190.039	27.491	31.5398	1.50412	0.00395283	0.0118571
10526087	NM_026445	Sumf2	sulfatase modifying factor 2	431.86	287.156	100.806	32.0524	1.50392	0.0585032	0.0693046
10594315	NM_010193	Fem1b	feminization 1 homolog b (C. elegans)	2621.22	1743.39	137.153	147.998	1.50352	0.000131384	0.00172305
10410929	NM_023538	Agk	acylglycerol kinase	366.797	243.971	42.16	28.181	1.50345	0.00415623	0.0121786
10418004	NM_018829	Ap3m1	adaptor-related protein complex 3	2586.36	1721.26	183.71	207.944	1.50259	0.000834095	0.00475633
10374455	NM_033523	Spred2	sprouty-related	2166.51	1441.97	172.234	78.3698	1.50247	0.00129128	0.00610146
10514049	NM_001113209	Nfib	nuclear factor I	237.575	158.138	65.438	43.7557	1.50233	0.0970367	0.0990765
[truncated: 15,888 more rows]
