# Supplementary material for: Transcriptional profiling at whole population and single cell levels reveals somatosensory neuron molecular diversity
Source: eLife. 2014 Dec 19;3:e04660. doi: 10.7554/eLife.04660 (PMC4383053; doi:10.7554/eLife.04660)
Supplement: Supplementary file 2. — Comparison of IB4 positive vs IB4 negative SNS-Cre/TdT neuron profiles. Differential expression analysis of microarray data from IB4+SNS-Cre/TdTomato+ neurons (n = 3) vs IB4−SNS-Cre/TdTomato+ neurons (n = 3). These cells were sorted from the same animals. Transcripts are ranked by fold-change, with the following information given: Affymetrix ID, genebank accession number, gene symbol, description, average RMA normalized levels, standard deviation, fold-change, p-value and FDR. DOI: http://dx.doi.org/10.7554/eLife.04660.032 [file elife04660s002.xlsx]

## Sheet: Sheet1
Pair-wise comparisons of IB4 positive vs. IB4 negative SNS-Cre/TdTomato+ neuron transcriptional profiles
All transcripts (CoV<0.65 within groups)				Average Expression		Standard Deviation		Fold-Difference
Affymetrix Probe ID	Genbank Accession Number	Gene Symbol	Description	IB4Pos	IB4Neg	IB4Pos	IB4Neg	IB4Pos/IB4Neg	P-value	FDR
10559389	NM_203490	Mrgprd	MAS-related GPR	5988.1	290.156	657.583	51.8056	20.6375	0.00412512	0.0493491
10404376	NM_177322	Agtr1a	angiotensin II receptor	2618.55	128.008	232.552	4.97923	20.4562	0.00287757	0.0453018
10563745	NM_207538	Mrgprb5	MAS-related GPR	2065.21	107.175	191.627	13.2443	19.2694	0.00300376	0.0460882
10563747	NM_205795	Mrgprb4	MAS-related GPR	2929.87	167.978	459.192	80.2404	17.442	0.00707076	0.0582888
10467153	NM_172838	Slc16a12	solute carrier family 16 (monocarboxylic acid transporters)	1824.15	115.679	140.63	18.1554	15.769	0.00182629	0.0397142
10445268	NM_001081178	Gpr116	G protein-coupled receptor 116	1270.29	81.0521	144.235	9.42453	15.6725	0.00465383	0.0509673
10469255	NM_008859	Prkcq	protein kinase C	5518.85	375.947	354.402	24.9422	14.6799	0.00147453	0.0371418
10365769	NM_010401	Hal	histidine ammonia lyase	889.136	62.9697	87.7721	1.62631	14.12	0.00372666	0.0477308
10500938	NM_009520	Wnt2b	wingless related MMTV integration site 2b	1745.47	130.242	235.231	12.6177	13.4018	0.0068075	0.0578
10541799	NM_001163269	Lpar5	lysophosphatidic acid receptor 5	2708.92	214.634	191.844	43.8268	12.6211	0.00104425	0.034309
10496789	NM_022983	Lpar3	lysophosphatidic acid receptor 3	2184.24	185.028	378.737	41.6838	11.8049	0.0106925	0.0686684
10466224	NM_133246	Ms4a3	membrane-spanning 4-domains	630.559	59.4157	81.5524	9.53065	10.6127	0.00591768	0.0553211
10455863	NM_001134697	Ctxn3	cortexin 3	4883.84	489.68	397.013	14.744	9.97353	0.0026644	0.0442505
10340289	---			268.335	32.3181	134.598	0.0300184	8.30295	0.0934597	0.156682
10589535	NM_008694	Ngp	neutrophilic granule protein	305.46	38.0252	152.868	3.29683	8.03308	0.0937313	0.156847
10497862	NM_019510	Trpc3	transient receptor potential cation channel	3452.59	432.509	224.204	22.6526	7.98271	0.00159964	0.0385787
10583163	NM_013838	Trpc6	transient receptor potential cation channel	2191.95	285.755	119.453	3.07333	7.67073	0.00129396	0.0366677
10482059	NM_010283	Ggta1	glycoprotein galactosyltransferase alpha 1	1372.11	181.099	199.637	42.4424	7.5766	0.00645937	0.0568123
10604576	NM_016697	Gpc3	glypican 3	721.808	99.3076	91.595	5.36679	7.26841	0.00691285	0.0580961
10440621	NM_146072	Grik1	glutamate receptor	4127.43	572.601	139.517	159.975	7.20821	0.00147403	0.0372327
10607169	NM_009428	Trpc5	transient receptor potential cation channel	601.377	91.9187	118.409	14.3903	6.54248	0.0159014	0.0789672
10508368	NM_001009819	A3galt2	alpha 1	3209.72	501.65	124.753	57.1688	6.39833	8.38775e-05	0.0281704
10357339	NM_145100	Lypd1	Ly6	1740.42	272.887	675.589	4.83616	6.3778	0.0639314	0.134664
10445944	NM_172829	St6gal2	beta galactoside alpha 2	2015.3	317.158	213.095	46.5421	6.35424	0.00331493	0.0463886
10339040	---			346.46	56.3615	97.5243	18.9054	6.14711	0.0302834	0.0996406
10492169	NM_010750	Mab21l1	mab-21-like 1 (C. elegans)	695.899	113.352	115.867	11.5618	6.13929	0.0119935	0.0714564
10538187	NM_053110	Gpnmb	glycoprotein (transmembrane) nmb	592.721	96.6012	383.682	4.64425	6.13576	0.154433	0.195586
10415857	NM_177628	Fam167a	family with sequence similarity 167	412.376	70.7016	70.7261	0.266914	5.83264	0.0139824	0.0761058
10433163	NM_021391	Ppp1r1a	protein phosphatase 1	2623.61	453.413	194.464	39.5297	5.78637	0.00165675	0.0385216
10362186	NM_021509	Moxd1	monooxygenase	2667.44	464.414	221.36	100.687	5.74367	0.000792412	0.0337352
10490966	NM_001163537	Dnajc5b	DnaJ (Hsp40) homolog	280.35	49.368	54.0715	0.230338	5.67877	0.0177788	0.0817123
10419167	NM_008962	Ptgdr	prostaglandin D receptor	2071.57	365.125	80.6404	53.0177	5.6736	0.000106108	0.0310384
10456545	NM_201362	Ccdc68	coiled-coil domain containing 68	1570.22	284.059	154.971	53.9451	5.52779	0.00180157	0.039652
10478285	NR_033569	9430021M05Rik	RIKEN cDNA 9430021M05 gene	1467.68	271.567	381.549	56.7297	5.4045	0.0290182	0.0978206
10584615	NM_021424	Pvrl1	poliovirus receptor-related 1	1991.95	368.849	182.241	29.1134	5.40045	0.00318996	0.0463566
10602255	NM_001033795	Zcchc16	zinc finger	283.92	52.77	45.1586	1.65459	5.38033	0.0123547	0.0722787
10552526	NM_026806	Klk5	kallikrein related-peptidase 5	244.573	45.4809	35.6455	1.85915	5.37748	0.0102827	0.0676167
10448278	NM_001033339	Mmp25	matrix metallopeptidase 25	2452.83	473.532	157.905	167.083	5.17986	0.00413151	0.0492954
10339264	---			343.43	66.8189	111.779	3.97932	5.13971	0.0501078	0.121329
10484463	NM_009776	Serping1	serine (or cysteine) peptidase inhibitor	5709.37	1130.39	290.81	180.388	5.05078	0.000220453	0.0302889
10607156	NM_001110222	Dcx	doublecortin	426.963	86.7864	82.5691	2.02096	4.9197	0.019003	0.0836499
10522075	NM_175174	Klhl5	kelch-like 5 (Drosophila)	3780.36	779.214	105.367	59.4316	4.8515	3.30363e-05	0.0230441
10477986	NM_010923	Nnat	neuronatin	1674.4	347.922	255.922	75.3456	4.81258	0.00699064	0.0582104
10456046	NM_001146268	Pdgfrb	platelet derived growth factor receptor	1107.86	231.325	84.0627	16.4621	4.78919	0.00198701	0.0401297
10343434	---			370.454	79.1496	85.1356	45.934	4.68042	0.0160163	0.0790616
10397736	NM_001164427	Kcnk13	potassium channel	759.331	163.883	68.8261	21.7015	4.63336	0.00184509	0.0396475
10467887	NM_030703	Cpn1	carboxypeptidase N	846.4	183.091	142.637	10.797	4.62284	0.0144584	0.0768515
10542287	NM_025778	Bcl2l14	BCL2-like 14 (apoptosis facilitator)	406.378	88.6568	42.6927	9.92073	4.58372	0.00367642	0.0476935
10456161	NM_008313	Htr4	5 hydroxytryptamine (serotonin) receptor 4	1506.54	329.237	120.958	16.7893	4.57584	0.00282115	0.04496
10443854	NM_177307	Cyp4f39	cytochrome P450	1636.58	362.05	112.317	77.8225	4.52032	0.000766761	0.0344207
10572897	NM_010442	Hmox1	heme oxygenase (decycling) 1	1823.96	406.095	210.258	40.0364	4.49147	0.00527764	0.0528813
10514185	---			172.459	38.5286	37.4859	0.785074	4.47611	0.0250689	0.0924836
10516765	NM_172702	Serinc2	serine incorporator 2	4819.5	1087.83	509.157	28.4285	4.43036	0.00596248	0.0555111
10428388	NM_172815	Rspo2	R-spondin 2 homolog (Xenopus laevis)	2108.37	477.188	128.293	31.9245	4.41833	0.000992296	0.0332035
10394471	NM_011519	Sdc1	syndecan 1	1290.39	295.61	145.94	97.7293	4.36518	0.00302119	0.0461215
10586017	NM_028283	Uaca	uveal autoantigen with coiled-coil domains and ankyrin repeats	1152.88	266.015	81.3361	48.2723	4.33388	0.000611481	0.0357736
10594277	NM_028748	Paqr5	progestin and adipoQ receptor family member V	1610.93	371.888	98.6206	32.8794	4.33176	0.000659479	0.0355962
10339409	---			194.609	44.9386	59.1076	9.03413	4.33055	0.0442053	0.115023
10339509	---			275.809	63.9737	140.912	22.019	4.31129	0.116628	0.172413
10389231	NM_011337	Ccl3	chemokine (C-C motif) ligand 3	319.593	74.4392	167.834	2.59511	4.29334	0.127063	0.179221
10339796	---			407.84	95.0313	163.273	11.6214	4.29164	0.0789756	0.146843
10346330	NM_001114663	Plcl1	phospholipase C-like 1	608.653	142.208	58.0513	12.5406	4.28002	0.00328279	0.0465858
10339907	---			144.749	33.9034	92.5184	7.72971	4.26946	0.172411	0.205254
10341229	---			304.025	71.2103	59.5115	9.41694	4.26939	0.0181759	0.0821219
10338423	---			528.505	126.45	162.594	19.8061	4.17956	0.0477046	0.11894
10341910	---			240.385	57.6658	117.1	17.5475	4.16859	0.10962	0.16743
10340012	---			201.793	48.8997	79.577	11.154	4.12668	0.0757528	0.1441
10554521	NM_008803	Pde8a	phosphodiesterase 8A	623.057	151.088	60.9843	32.4372	4.1238	0.00155262	0.0382587
10459866	NM_001171010	Slc14a1	solute carrier family 14 (urea transporter)	259.189	64.1536	46.5735	5.39609	4.04014	0.0169403	0.0803424
10489305	NM_021464	Ptprt	protein tyrosine phosphatase	3505.27	873.628	91.081	182.514	4.01232	0.0136682	0.0753457
10439542	NM_001007460	Zdhhc23	zinc finger	1292.64	323.41	156.782	59.8839	3.9969	0.00350579	0.047097
10344522	---			621.533	156.597	337.725	31.8658	3.96901	0.138139	0.18555
10592067	NM_008026	Fli1	Friend leukemia integration 1	383.451	97.0186	105.824	10.7743	3.95235	0.0407822	0.111289
10342022	---			623.221	158.355	74.7792	6.23122	3.9356	0.00800942	0.0609819
10543967	NM_001081206	Dgki	diacylglycerol kinase	4354.28	1110.55	210.006	50.4301	3.92084	0.000660449	0.0354376
10555470	NM_001040111	Arap1	ArfGAP with RhoGAP domain	687.858	177.973	30.3283	3.81436	3.86495	0.000936382	0.0331684
10340129	---			629.271	163.597	168.748	29.528	3.84648	0.0362696	0.107481
10536499	NM_007616	Cav1	caveolin 1	1244.44	325.145	13.8077	98.5691	3.82733	0.0455575	0.116699
10489784	NM_177782	Prex1	phosphatidylinositol-3	880.815	230.586	161.322	8.92848	3.8199	0.0195188	0.0847277
10585703	NM_133982	Rpp25	ribonuclease P 25 subunit (human)	712.887	186.635	152.552	15.4387	3.81969	0.0254169	0.0930108
10563706	NM_001177566	Mrgpra9	MAS-related GPR	4645.12	1218.32	616.958	120.153	3.81274	0.00795562	0.0608789
10459747	NM_172632	Mapk4	mitogen-activated protein kinase 4	1327.67	348.567	89.8573	78.2264	3.80893	0.0021768	0.0411233
10402409	NM_009247	Serpina1e	serine (or cysteine) peptidase inhibitor	453.802	120.181	93.028	41.3239	3.77599	0.0137034	0.075356
10339380	---			171.709	45.7226	63.9542	7.51819	3.75545	0.0733932	0.14239
10404359	NM_153546	Mboat1	membrane bound O-acyltransferase domain containing 1	309.62	83.3407	54.3591	15.1187	3.71511	0.0122625	0.0721584
10340689	---			405.41	109.172	27.8929	4.74121	3.71348	0.00211046	0.0408053
10416485	NM_001128093	Siah3	seven in absentia homolog 3 (Drosophila)	1413.25	380.787	99.6682	46.2874	3.7114	0.000693752	0.0340051
10530841	NM_001159518	Igfbp7	insulin-like growth factor binding protein 7	709.79	191.275	349.742	13.8532	3.71083	0.12372	0.17715
10340221	---			520.034	140.158	151.935	24.6681	3.71034	0.044865	0.115941
10339751	---			517.151	139.685	138.761	4.8505	3.70226	0.0419894	0.112618
10419399	NM_029238	Slc35f4	solute carrier family 35	961.375	261.013	128.935	20.6151	3.68324	0.00911556	0.0644271
10502890	NM_011372	St6galnac3	ST6 (alpha-N-acetyl-neuraminyl-2	761.922	207.157	127.004	28.3634	3.678	0.0125307	0.0726988
10455866	NM_029290	1700011I03Rik	RIKEN cDNA 1700011I03 gene	153.388	42.2168	37.7792	5.20697	3.63334	0.0333947	0.103636
10468113	NM_145703	Kcnip2	Kv channel-interacting protein 2	2716.42	749.294	66.1105	144.256	3.62531	0.0166259	0.0795585
10342395	---			375.353	103.837	153.646	4.93094	3.61483	0.091987	0.155623
10462613	NM_008332	Ifit2	interferon-induced protein with tetratricopeptide repeats 2	977.614	270.835	72.2258	76.9433	3.60963	0.00722894	0.0587911
10595094	NM_027150	2310046A06Rik	RIKEN cDNA 2310046A06 gene	386.499	107.415	61.1057	17.6928	3.5982	0.00958525	0.0655993
10453456	NM_199251	Kcnk12	potassium channel	1598.45	446.13	195.903	3.74615	3.58292	0.00946725	0.0653839
10501860	NM_001114665	Fnbp1l	formin binding protein 1-like	946.626	265.411	129.626	52.9832	3.56664	0.00510861	0.0521676
10499348	NM_024246	Tmem79	transmembrane protein 79	2414.03	677.988	376.864	8.23033	3.56058	0.0152948	0.0783576
10476560	NM_001126490	Ism1	isthmin 1 homolog (zebrafish)	348.263	98.3495	74.2748	11.9888	3.54107	0.0246714	0.0921416
10352320	NM_144794	Tmem63a	transmembrane protein 63a	1465.64	418.088	50.8433	4.46115	3.50557	0.000694143	0.0338413
10366153	NM_146240	Rassf9	Ras association (RalGDS	379.843	109.068	119.721	23.4845	3.48261	0.0528163	0.124077
10608709	---			1924.47	553.085	535.032	184.967	3.47952	0.034259	0.104847
10526459	NM_133914	Rasa4	RAS p21 protein activator 4	633.211	182.866	30.2953	38.8227	3.46271	0.00735145	0.0589937
10351895	NM_146721	Olfr424	olfactory receptor 424	162.492	47.5832	37.9637	3.64398	3.41491	0.0330135	0.103017
10575052	NM_009864	Cdh1	cadherin 1	4199.61	1239.62	192.58	95.8467	3.38783	0.000209182	0.0296385
10459620	NM_001082553	Rab27b	RAB27b	2513.66	742.859	222.132	40.4425	3.38376	0.00376507	0.0480192
10342953	---			202.619	60.0949	125.341	20.5324	3.37165	0.183864	0.211369
10481627	NM_008491	Lcn2	lipocalin 2	399.385	118.539	177.843	64.8904	3.36923	0.0984999	0.160014
10497689	NM_013531	Gnb4	guanine nucleotide binding protein (G protein)	3708.83	1107.14	215.879	145.256	3.34992	0.000590174	0.0354417
10342904	---			636.171	190.836	167.766	23.6366	3.33361	0.0408022	0.111243
10357488	NM_010016	Cd55	CD55 antigen	4724.31	1426.22	245.133	42.0457	3.31247	0.00125805	0.0361013
10339865	---			425.654	128.701	228.225	46.1886	3.30732	0.146643	0.190619
10461459	NM_173068	Syt7	synaptotagmin VII	3267.26	997.863	291.423	110.536	3.27426	0.00191164	0.0396676
10441680	NM_011866	Pde10a	phosphodiesterase 10A	1594.09	489.273	175.593	8.86698	3.25807	0.00812717	0.0610076
10343032	---			318.067	97.8467	135.847	27.6597	3.25066	0.0995735	0.160322
10559297	NM_001042760	Slc22a18	solute carrier family 22 (organic cation transporter)	1327.76	409.569	162.969	17.8063	3.24185	0.0093768	0.0652062
10487987	NM_177303	Lrrn4	leucine rich repeat neuronal 4	311.896	96.3827	55.3935	4.82691	3.23602	0.0203435	0.0854051
10338141	---			477.937	147.985	159.36	13.2549	3.22962	0.068286	0.138373
10467124	NM_007392	Acta2	actin	332.641	103.029	173.496	5.34432	3.22862	0.148744	0.192248
10597945	NM_001002267	Tmem158	transmembrane protein 158	1657.06	521.102	246.694	35.6951	3.17991	0.0132946	0.0740056
10455259	NM_175164	Arhgap26	Rho GTPase activating protein 26	3363.64	1065.6	218.236	113.923	3.15658	0.000626718	0.0357427
10416340	NM_008115	Gfra2	glial cell line derived neurotrophic factor family receptor alpha 2	4940.47	1569.15	467.303	154.811	3.1485	0.00274275	0.0446521
10342630	---			112.827	35.9042	54.4063	1.6851	3.14246	0.133827	0.183231
10453256	NM_153512	Kcng3	potassium voltage-gated channel	3182.52	1018.54	201.178	50.8992	3.12458	0.00143846	0.0373752
10372028	NM_018797	Plxnc1	plexin C1	7092.73	2274.09	301.812	66.3236	3.11893	0.000683839	0.0346428
10530536	NM_001113460	Tec	tec protein tyrosine kinase	266.978	86.1002	31.4821	5.42738	3.10078	0.00784729	0.0607161
10338852	---			929.515	299.891	381.381	99.4423	3.09951	0.0932452	0.156554
10413047	NM_008873	Plau	plasminogen activator	408.673	132.171	11.1857	56.1868	3.092	0.0839326	0.149941
10340963	---			135.774	44.0254	43.7268	12.8091	3.084	0.0561133	0.127241
10522060	NM_026667	Fam114a1	family with sequence similarity 114	874.225	283.98	80.1533	17.4904	3.07847	0.00396195	0.0486815
10341396	---			489.282	160.088	95.4453	71.5358	3.05633	0.0249614	0.0924632
10592044	NM_144936	Tmem45b	transmembrane protein 45b	7473.79	2473.63	242.704	104.928	3.02139	0.000107407	0.028646
10563728	---			2053.13	679.878	126.693	91.0522	3.01985	0.000985789	0.0331079
10440427	NM_025967	D16Ertd472e	DNA segment	153.054	50.7753	84.7614	0.837218	3.01434	0.17177	0.20511
10502881	NM_012028	St6galnac5	ST6 (alpha-N-acetyl-neuraminyl-2	1781.74	591.494	109.691	70.8061	3.01227	0.000720981	0.0340513
10595298	NM_001081243	Filip1	filamin A interacting protein 1	936.341	311.232	79.8171	52.2117	3.0085	0.00192198	0.0397911
10604542	NM_001077202	Hs6st2	heparan sulfate 6-O-sulfotransferase 2	2034.7	682.61	121.232	93.7196	2.98076	0.00120219	0.0353943
10382692	BC065414	2210020M01Rik	RIKEN cDNA 2210020M01 gene	365.808	122.918	40.5137	7.64796	2.97603	0.00685054	0.0578405
10353750	NM_145392	Bag2	BCL2-associated athanogene 2	606.522	203.89	8.22504	37.8391	2.97475	0.0366424	0.107602
10477035	NM_001040689	Rspo4	R-spondin family	361.041	121.679	136.198	5.72178	2.96715	0.0927085	0.156115
10439845	ENSMUST00000099713	Gm5486	predicted gene 5486	112.783	38.1684	12.3885	3.29273	2.95487	0.0053413	0.0531668
10485405	NM_009851	Cd44	CD44 antigen	2095.83	712.284	138.98	147.755	2.9424	0.00690669	0.0582062
10511984	NM_027041	1700003M02Rik	RIKEN cDNA 1700003M02 gene	865.168	294.387	32.8319	5.55822	2.93888	0.000729517	0.0339244
10601854	NM_011712	Wbp5	WW domain binding protein 5	1766.68	603.462	189.219	145.139	2.92758	0.00586251	0.0551465
10572097	NM_028182	Sh2d4a	SH2 domain containing 4A	157.639	54.078	31.4178	8.84127	2.91503	0.0208925	0.0863114
10385466	NM_011891	Sgcd	sarcoglycan	1363.06	467.839	160.106	43.0533	2.91352	0.00629775	0.0564309
10339186	---			237.879	81.8023	41.967	14.0222	2.90798	0.0142633	0.0764869
10461856	NM_008137	Gna14	guanine nucleotide binding protein	3117.44	1074.01	210.815	61.1716	2.90263	0.00155353	0.0381772
10552500	NM_008940	Klk8	kallikrein related-peptidase 8	183.235	63.3899	34.7887	6.3475	2.8906	0.0227054	0.089054
10586491	NM_010019	Dapk2	death-associated protein kinase 2	286.257	99.2572	33.4289	7.20942	2.88399	0.00738566	0.0589553
10594251	NM_024245	Kif23	kinesin family member 23	209.257	72.6843	50.4896	2.98112	2.87899	0.0420256	0.112615
10484486	ENSMUST00000099933	P2rx3	purinergic receptor P2X	401.543	139.476	84.2071	16.5128	2.87894	0.0274617	0.0957044
10431326	NM_133241	Mlc1	megalencephalic leukoencephalopathy with subcortical cysts 1 homolog (human)	735.934	255.769	53.3703	64.5866	2.87734	0.0146352	0.0771132
10341173	---			293.737	102.144	153.85	2.27471	2.87571	0.163681	0.200684
10395827	NM_020287	Insm2	insulinoma-associated 2	794.817	277.267	150.377	7.16362	2.86661	0.026666	0.0947892
10514491	NM_001100182	Cyp2j12-ps	cytochrome P450	1486.59	519.209	112.097	82.3679	2.86319	0.00201635	0.039922
10417048	NM_015820	Hs6st3	heparan sulfate 6-O-sulfotransferase 3	1466.75	512.531	170.37	44.4987	2.86179	0.00642369	0.0567739
10445867	NM_013880	Plcl2	phospholipase C-like 2	457.177	160.232	24.2848	21.7125	2.85322	0.00185965	0.0395851
10361250	NM_144817	Camk1g	calcium	1741.6	610.526	55.8261	95.0628	2.85263	0.0134961	0.0748515
10446763	NM_029999	Lbh	limb-bud and heart	1870.43	656.506	30.4431	42.2726	2.84907	0.00192511	0.039765
10477052	NM_001164819	2310046K01Rik	RIKEN cDNA 2310046K01 gene	412.911	144.999	63.5107	27.0109	2.84768	0.00900929	0.0642266
10478160	BC068129	Fam83d	family with sequence similarity 83	175.33	61.7537	30.1763	3.2047	2.83918	0.0212586	0.0871092
10348739	NM_172463	Sned1	sushi	414.525	146.611	6.08165	7.34115	2.82738	0.000694699	0.0336873
10587639	NM_011851	Nt5e	5' nucleotidase	3293.69	1167.5	262.861	142.364	2.82115	0.00137219	0.0377062
10481393	NM_025428	Zdhhc12	zinc finger	1275.09	453.512	152.473	10.1264	2.81159	0.0108931	0.0693183
10455374	NM_178749	Stk32a	serine	814.695	289.944	150.644	16.2235	2.80984	0.0247521	0.0922532
10371959	NM_013508	Elk3	ELK3	386.126	137.533	43.1048	6.03142	2.80751	0.00841292	0.0620231
10339801	---			132.945	47.5164	42.037	4.54743	2.79788	0.069705	0.139256
10417526	NM_007870	Dnase1l3	deoxyribonuclease 1-like 3	1582.99	567.379	174.572	89.5414	2.79001	0.00353074	0.0470834
10471525	NM_178595	Ptrh1	peptidyl-tRNA hydrolase 1 homolog (S. cerevisiae)	828.475	297.641	47.9471	33.0638	2.78347	0.00081112	0.0328359
10567995	NM_019738	Nupr1	nuclear protein 1	223.868	80.5193	12.6153	9.18597	2.78031	0.000903841	0.0331823
10452571	NM_008984	Ptprm	protein tyrosine phosphatase	1645.76	594.266	117.536	12.3847	2.76939	0.00366885	0.0476635
10401244	NM_134156	Actn1	actinin	2175.77	787.434	67.6452	65.1601	2.76311	0.000810957	0.0329765
10530560	NM_153567	Slain2	SLAIN motif family	244.225	88.7409	126.802	2.50159	2.75211	0.167572	0.202741
10342229	---			2013.7	731.882	308.24	127.889	2.75139	0.00946662	0.0654293
10496359	NM_001163522	Emcn	endomucin	121.323	44.164	44.3364	5.8365	2.74711	0.0911714	0.155169
10494016	NM_025416	Them5	thioesterase superfamily member 5	207.805	75.7905	38.9237	7.38416	2.74183	0.0231709	0.0896773
10590060	NM_133710	Ctdspl	CTD (carboxy-terminal domain	625.313	228.129	147.446	12.8599	2.74105	0.04163	0.112084
10341540	---			281.692	102.784	134.498	23.0167	2.74062	0.142766	0.18836
10574934	NM_175024	Nrn1l	neuritin 1-like	2007.13	732.459	435.905	56.7095	2.74027	0.0341169	0.104659
10341447	---			122.937	45.232	58.3277	0.157705	2.71791	0.147392	0.191236
10463732	NM_146100	Ina	internexin neuronal intermediate filament protein	2728.42	1009.06	107.027	193.042	2.70393	0.0225424	0.0887985
10341684	---			403.391	149.951	188.26	53.4843	2.69016	0.13517	0.183849
10339179	---			192.574	71.6376	27.8116	13.6642	2.68817	0.00802575	0.0609527
10517401	NM_001013756	Grhl3	grainyhead-like 3 (Drosophila)	939.532	350.517	65.7673	77.134	2.68042	0.0130364	0.0736994
10390059	NM_145828	Xylt2	xylosyltransferase II	850.862	319.342	104.892	22.3642	2.66442	0.00925752	0.0647741
10514177	NM_172870	Bnc2	basonuclin 2	2079.34	784.215	215.495	95.9751	2.65149	0.00334151	0.0464025
10466735	NM_001114174	Fam189a2	family with sequence similarity 189	797.519	300.91	99.5675	31.5996	2.65036	0.00720412	0.0588001
10470214	NM_175462	Kcnt1	potassium channel	3909.2	1482.92	326.004	34.5095	2.63615	0.00534448	0.0531401
10401149	NM_013738	Plek2	pleckstrin 2	377.983	143.486	45.7135	30.2472	2.63429	0.0065952	0.0570661
10340773	---			152.192	57.9172	88.9622	5.14553	2.62775	0.207342	0.223193
10497752	NM_025821	Carhsp1	calcium regulated heat stable protein 1	3030.35	1154.32	28.6499	109.805	2.62523	0.0205592	0.0855581
10438815	NM_177718	1600021P15Rik	RIKEN cDNA 1600021P15 gene	568.436	216.654	81.4826	28.9919	2.6237	0.0094424	0.0653616
10576844	NM_207203	BC068157	cDNA sequence BC068157	302.708	115.409	119.632	3.87657	2.62292	0.113104	0.170059
10339881	---			297.37	113.434	188.959	8.1086	2.62152	0.233597	0.236202
10541114	NM_027526	Rasgef1a	RasGEF domain family	3478.73	1328.47	311.973	1.48312	2.61859	0.00694217	0.058127
10341646	---			499.785	191.326	214.773	46.2851	2.61222	0.123139	0.176962
10381445	NM_144830	Tmem106a	transmembrane protein 106A	671.057	257.128	67.1343	52.0476	2.60982	0.00601804	0.0556853
10484307	NM_011356	Frzb	frizzled-related protein	1443.3	553.324	107.063	18.8315	2.60843	0.00350957	0.0470085
10402347	NM_029803	Ifi27l2a	interferon	230.982	88.5635	14.2639	13.2443	2.6081	0.00365682	0.0476437
10463737	ENSMUST00000037636	Ina	internexin neuronal intermediate filament protein	2497.43	958.321	64.1567	226.451	2.60604	0.0544347	0.125922
10412719	NM_028052	Synpr	synaptoporin	2199.62	845.608	85.6303	32.9485	2.60123	0.000277997	0.0323189
10419073	NM_145928	Tspan14	tetraspanin 14	2576.81	992.15	96.3332	86.1961	2.5972	0.000895611	0.0331486
10380260	NM_009546	Trim25	tripartite motif-containing 25	1003.97	387.446	214.669	2.68597	2.59126	0.0380892	0.108991
10459927	NM_001190373	Kcng2	potassium voltage-gated channel	1582.36	611.327	355.434	32.3722	2.5884	0.0404063	0.111032
10419062	NM_177816	Sh2d4b	SH2 domain containing 4B	447.816	173.717	28.6746	14.4097	2.57784	0.000837128	0.0330047
10418053	NM_010610	Kcnma1	potassium large conductance calcium-activated channel	1609.74	624.945	95.1628	42.5009	2.5758	0.00072196	0.0339209
10580469	NM_019626	Cbln1	cerebellin 1 precursor protein	246.771	96.583	79.6241	9.50769	2.55501	0.0793708	0.147065
10339756	---			2428.98	952.316	256.879	44.6309	2.5506	0.00781113	0.0606952
10594967	NM_001081153	Unc13c	unc-13 homolog C (C. elegans)	1549.5	607.801	37.8629	40.9292	2.54936	0.0010815	0.0346539
10442254	---			599.351	235.117	176.066	41.3889	2.54916	0.0608062	0.131628
10482336	NM_053011	Lrp1b	low density lipoprotein-related protein 1B (deleted in tumors)	312.454	122.689	25.8633	14.8763	2.5467	0.00190298	0.0397609
10338107	---			318.625	125.155	41.5372	24.2071	2.54584	0.00718571	0.0588087
10496494	NM_019571	Tspan5	tetraspanin 5	3273.58	1288.09	212.102	101.991	2.54142	0.000906309	0.0331387
10363312	NM_001162956	Ccdc138	coiled-coil domain containing 138	274.149	107.987	28.266	21.6021	2.53872	0.0065323	0.0570115
10506470	NM_001162980	1700024P16Rik	RIKEN cDNA 1700024P16 gene	106.59	41.9918	19.1432	1.08282	2.53835	0.027561	0.0958296
10550906	NM_011113	Plaur	plasminogen activator	584.01	230.466	129.523	59.5737	2.53404	0.0278753	0.0962578
10492402	NM_010597	Kcnab1	potassium voltage-gated channel	3596.9	1423.19	163.813	107.243	2.52734	0.000413465	0.036051
10602044	NM_177750	Frmpd3	FERM and PDZ domain containing 3	345.718	137.654	59.7669	35.7433	2.51151	0.0166374	0.0795717
10339656	---			2565.48	1022.46	316.071	47.2934	2.50913	0.011661	0.0706359
10345675	NM_008719	Npas2	neuronal PAS domain protein 2	655.546	261.631	129.417	3.28416	2.50561	0.0340385	0.104525
10579054	NM_001039553	4930467E23Rik	RIKEN cDNA 4930467E23 gene	371.177	148.288	26.6706	1.70809	2.50309	0.00453728	0.050858
10506433	NM_177259	Dab1	disabled homolog 1 (Drosophila)	208.5	83.3792	67.4713	7.29779	2.50062	0.0823513	0.149084
10496262	NM_178877	Nhedc2	Na+	188.892	75.5521	50.8209	3.43629	2.50015	0.0600233	0.131091
10339173	---			109.663	43.9536	36.4759	2.2425	2.49496	0.0883679	0.152924
10603182	NM_009707	Arhgap6	Rho GTPase activating protein 6	156.985	63.0333	24.6374	3.29931	2.49052	0.0199329	0.0850594
10438639	NM_138650	Dgkg	diacylglycerol kinase	3145.19	1265.09	423.001	28.0645	2.48614	0.0159616	0.0789631
10338711	---			181.367	73.2733	101.919	11.1075	2.47521	0.205905	0.222439
10594971	NM_001081153	Unc13c	unc-13 homolog C (C. elegans)	259.287	104.915	49.6862	15.7205	2.47141	0.0226123	0.0888811
10346594	NM_001033373	Cdk15	cyclin-dependent kinase 15	2359.79	955.673	388.205	84.6646	2.46924	0.0191676	0.0841298
10340388	---			126.896	51.3937	35.6528	3.89237	2.46911	0.0645528	0.135376
10567546	NM_016669	Crym	crystallin	391.757	159.151	57.4183	16.7034	2.46155	0.012691	0.0729291
10472022	NM_027990	Lypd6b	LY6	471.708	191.674	71.718	9.28148	2.461	0.0191285	0.0840799
10479698	NM_008665	Myt1	myelin transcription factor 1	1331.91	542.223	33.8321	27.4646	2.45639	0.000207926	0.0299281
10487722	NM_001081162	Slc4a11	solute carrier family 4	1258.81	516.794	106.343	13.2793	2.43581	0.00585885	0.0552267
10545623	NM_010070	Dok1	docking protein 1	246.746	101.332	35.6185	1.66212	2.43503	0.0191452	0.0841125
10416777	NM_009769	Klf5	Kruppel-like factor 5	2012.64	828.324	258.919	30.0265	2.42977	0.0141675	0.0763344
10594965	NM_001081153	Unc13c	unc-13 homolog C (C. elegans)	767.995	316.091	46.4267	19.104	2.42966	0.00094303	0.0331449
10509514	NM_001099631	Sh2d5	SH2 domain containing 5	648.074	266.957	53.7816	27.9332	2.42763	0.00199888	0.040013
10469828	NM_177611	Psd4	pleckstrin and Sec7 domain containing 4	196.197	80.8833	34.4458	7.87269	2.42568	0.0222312	0.0884954
10340406	---			1645.79	678.962	150.789	83.8839	2.42399	0.00274836	0.0446634
10606186	NM_009197	Slc16a2	solute carrier family 16 (monocarboxylic acid transporters)	1128.83	465.862	204.944	46.6154	2.4231	0.0239959	0.0909299
10437590	NM_025821	Carhsp1	calcium regulated heat stable protein 1	1603.95	662.46	129.635	29.5582	2.4212	0.00394812	0.0485774
10594948	NM_001081153	Unc13c	unc-13 homolog C (C. elegans)	1608.86	664.53	93.9646	81.1074	2.42105	0.00256571	0.0438152
10542791	NM_001170433	Ppfibp1	PTPRF interacting protein	995.49	411.607	78.3713	1.5454	2.41854	0.00592876	0.0553107
10483828	NM_001081033	Pde11a	phosphodiesterase 11A	2468.14	1020.75	129.643	81.8818	2.41797	0.00063255	0.0358498
10368373	NM_029881	Tmem200a	transmembrane protein 200A	1465.67	607.17	75.3219	51.562	2.41395	0.000729564	0.0337535
10406663	NM_009712	Arsb	arylsulfatase B	2449.97	1015.11	272.864	12.8579	2.4135	0.011634	0.0707084
10365469	NM_001163614	Ascl4	achaete-scute complex homolog 4 (Drosophila)	380.548	157.831	91.2164	28.3677	2.41111	0.0396189	0.110373
10420589	NM_028113	Fam123a	family with sequence similarity 123	699.56	290.264	100.499	40.2696	2.41008	0.0101801	0.0674806
10441003	NM_001111023	Runx1	runt related transcription factor 1	3970.98	1648.84	240.096	19.7295	2.40834	0.00328185	0.0466455
10485081	NM_001166597	Dgkz	diacylglycerol kinase zeta	4245.1	1762.87	254.947	32.4742	2.40806	0.00291401	0.0456378
10579422	NM_032397	Kcnn1	potassium intermediate	699.711	290.617	73.7204	2.68943	2.40767	0.0105353	0.0684344
10454441	NM_009308	Syt4	synaptotagmin IV	463.821	192.84	228.041	17.8312	2.40521	0.174728	0.206468
10594963	NM_001081153	Unc13c	unc-13 homolog C (C. elegans)	1537.56	639.488	27.2706	10.1319	2.40436	4.16101e-05	0.0235825
10552140	NM_007678	Cebpa	CCAAT	189.587	78.9049	19.751	9.48396	2.40273	0.00394309	0.0487138
10447477	ENSMUST00000097270	Gm10493	predicted gene 10493	248.433	103.624	53.5545	5.17221	2.39745	0.0410363	0.111412
10341749	---			2788.95	1168.58	323.735	52.2982	2.38662	0.0107902	0.068905
10594973	NM_001081153	Unc13c	unc-13 homolog C (C. elegans)	1966.05	825.167	95.5356	66.0221	2.38261	0.000656574	0.0356516
10456492	BC096371	D18Ertd653e	DNA segment	799.244	335.555	128.765	3.46098	2.38185	0.0246503	0.092101
10392388	NM_011101	Prkca	protein kinase C	6388.92	2683.06	372.301	156.962	2.38121	0.0008599	0.0331812
10464365	NM_207261	Kcnk18	potassium channel	636.989	268.362	146.454	21.5105	2.37362	0.0450084	0.116113
10448676	NM_023055	Slc9a3r2	solute carrier family 9 (sodium	2602.21	1097.44	414.21	20.6785	2.37116	0.0239851	0.0909646
10556820	NM_145586	Tmem159	transmembrane protein 159	721.087	305.464	91.1697	117.37	2.36063	0.0607375	0.131637
10512766	NM_029077	Trim14	tripartite motif-containing 14	755.733	321.443	53.4109	43.3896	2.35106	0.00342334	0.0467513
10593646	NM_001033535	Tnfaip8l3	tumor necrosis factor	293.193	124.933	40.3471	15.1596	2.34681	0.00994173	0.0667296
10406676	NM_172589	Lhfpl2	lipoma HMGIC fusion partner-like 2	1166.57	497.179	119.368	77.6823	2.34639	0.004964	0.0516803
10606728	ENSMUST00000096324	Gm10344	predicted gene 10344	337.472	143.993	25.0683	15.9398	2.34368	0.00189185	0.0397114
10374012	NM_145216	Rasl10a	RAS-like	201.725	86.1977	47.2497	0.881412	2.34026	0.0514205	0.122609
10599207	NM_001085497	Slc25a43	solute carrier family 25	652.475	279.511	91.841	28.9006	2.33434	0.011972	0.0714223
10370303	NR_004429	Adarb1	adenosine deaminase	955.397	409.622	119.068	22.7378	2.33238	0.0121728	0.0718169
10598178	NM_026866	Disp1	dispatched homolog 1 (Drosophila)	1193.03	511.927	131.596	53.7162	2.33046	0.00532749	0.053146
10341057	---			1142.42	491.62	255.751	15.3604	2.32378	0.0471294	0.118385
10350951	NM_022312	Tnr	tenascin R	1155.66	497.989	157.205	33.5003	2.32065	0.0141086	0.0761526
10538377	NM_001167860	Wipf3	WAS	1735.6	748.447	252.069	52.0739	2.31894	0.0165161	0.0794945
10355105	---			147.31	63.8047	73.2656	3.11775	2.30876	0.186758	0.212968
10490203	NM_010309	Gnas	GNAS (guanine nucleotide binding protein	2160.07	937.778	1269.73	71.9837	2.30339	0.236969	0.237519
10372781	NM_028679	Irak3	interleukin-1 receptor-associated kinase 3	618.854	269.902	27.6413	14.7873	2.29288	0.000367223	0.0354253
10338316	---			299.58	130.751	93.7417	14.5469	2.29123	0.0845122	0.150237
10345855	NM_001033289	Slc9a2	solute carrier family 9 (sodium	169.701	74.0773	37.4908	4.30573	2.29086	0.045217	0.116452
10456904	NM_013831	Pstpip2	proline-serine-threonine phosphatase-interacting protein 2	2198.56	961.103	350.631	94.3365	2.28754	0.0182961	0.0823779
10340060	---			2740.6	1202.38	300.564	62.296	2.27931	0.00920151	0.0647318
10547100	NM_026376	Plxnd1	plexin D1	3100.47	1360.45	306.609	61.316	2.27901	0.00748183	0.0593053
10350725	NM_026380	Rgs8	regulator of G-protein signaling 8	1310.02	575.295	238.683	51.1546	2.27712	0.0272926	0.0954452
10340728	---			213.796	93.8944	15.0321	21.9772	2.27698	0.0345965	0.105346
10599927	NM_008032	Aff2	AF4	1623.79	713.681	162.057	63.4571	2.27524	0.00442319	0.0503888
10432972	NM_011244	Rarg	retinoic acid receptor	682.463	299.979	50.5737	7.87359	2.27504	0.00457369	0.0509512
10406672	NM_009712	Arsb	arylsulfatase B	1395.13	613.556	197.659	19.1488	2.27385	0.0194863	0.0847082
10342254	---			103.593	45.566	32.9323	6.09319	2.27348	0.0863222	0.151582
10563487	NM_011510	Abcc8	ATP-binding cassette	420.781	185.183	43.9807	19.6301	2.27225	0.00459403	0.0508033
10413609	NM_181390	Mustn1	musculoskeletal	700.671	308.865	49.9979	26.5694	2.26853	0.00149651	0.0374872
10341160	---			127.292	56.1453	27.7467	14.8516	2.26719	0.0342197	0.104833
10596303	NM_019807	Acpp	acid phosphatase	6619.86	2931.53	120.24	75.3822	2.25815	3.10308e-05	0.023449
10474851	NM_001045523	Bahd1	bromo adjacent homology domain containing 1	954.738	422.853	104.826	31.6956	2.25785	0.00719625	0.0588419
10594969	NM_001081153	Unc13c	unc-13 homolog C (C. elegans)	1471.75	652.176	137.92	7.2179	2.25668	0.00909057	0.0643508
10399555	NM_201531	Kcnf1	potassium voltage-gated channel	158.023	70.0252	40.8505	0.0231726	2.25666	0.064917	0.135669
10418901	BC066049	Gprin2	G protein regulated inducer of neurite outgrowth 2	289.521	128.648	71.4623	13.2056	2.25049	0.0539289	0.12536
10546370	NM_001159507	Grip2	glutamate receptor interacting protein 2	204.892	91.0464	29.9124	3.13262	2.25041	0.020829	0.0862062
10340152	---			109.672	48.8515	49.2421	9.95675	2.24501	0.159851	0.198593
10338223	---			105.008	46.8459	61.0599	14.5082	2.24157	0.236889	0.237517
10548892	NM_007486	Arhgdib	Rho	103.821	46.3501	61.3837	3.38713	2.23994	0.245969	0.241993
10392970	NR_029442	Mif4gd	MIF4G domain containing	409.745	183.144	30.6245	1.60412	2.23729	0.0058714	0.0550588
10338434	---			968.716	434.17	446.587	0.171724	2.23119	0.173897	0.205969
10338491	---			1328.78	595.74	851.691	24.7864	2.23046	0.274433	0.256394
10340423	---			2532.54	1135.75	264.44	146.767	2.22983	0.00481063	0.0512606
10534883	NM_010571	Irs3	insulin receptor substrate 3	212.393	95.5267	54.564	1.97045	2.22339	0.0653198	0.135853
10400748	NM_183294	Cdkl1	cyclin-dependent kinase-like 1 (CDC2-related kinase)	424.335	191.201	66.9787	33.1536	2.21932	0.0148114	0.0774566
10478409	NM_001039390	Pkig	protein kinase inhibitor	502.998	226.709	37.2725	26.5514	2.21869	0.00279872	0.0449182
10587383	NM_153098	Cd109	CD109 antigen	308.52	139.199	69.6394	24.9257	2.2164	0.0383567	0.109274
10427744	NM_030690	Rai14	retinoic acid induced 14	435.477	196.664	32.0611	8.61241	2.21432	0.0032025	0.046169
10474002	NM_007699	Chrm4	cholinergic receptor	713.093	322.13	24.5129	32.8126	2.21368	0.00785538	0.0606751
10340566	---			1800.86	815.562	92.7	24.0497	2.20812	0.00143538	0.0375102
10341762	---			619.444	280.624	118.884	69.4294	2.20738	0.0277408	0.0961227
10597470	NM_027294	Cmtm8	CKLF-like MARVEL transmembrane domain containing 8	489.221	221.648	73.4604	24.6085	2.2072	0.014984	0.0776875
10392410	ENSMUST00000100300	Gm10838	predicted gene 10838	161.204	73.1598	33.6201	8.4701	2.20345	0.036471	0.107691
10338759	---			173.331	78.6682	8.02315	20.6212	2.20332	0.0736084	0.142502
10342405	---			770.848	350.329	97.7572	18.2297	2.20036	0.0140874	0.0761291
10597714	NM_011887	Scn11a	sodium channel	7443.9	3386.1	342.162	178.751	2.19837	0.000441387	0.0363863
10424113	NM_178920	Mal2	mal	8807.54	4007.51	398.547	284.387	2.19776	0.000712968	0.0340273
10408077	NM_178183	Hist1h2ak	histone cluster 1	706.83	321.711	224.378	43.4804	2.19709	0.0901301	0.154528
10577980	NM_021369	Chrna6	cholinergic receptor	3024.26	1376.93	354.648	9.59873	2.19638	0.0150203	0.0778308
10459292	ENSMUST00000064248	Gm9876	predicted gene 9876	318.532	145.177	72.9436	31.4597	2.1941	0.0393268	0.110339
10579060	NM_001039553	4930467E23Rik	RIKEN cDNA 4930467E23 gene	143.09	65.2739	2.87823	13.0311	2.19215	0.0672476	0.137436
10419966	NM_001039198	Zfhx2	zinc finger homeobox 2	1767.81	806.473	168.093	57.5301	2.19203	0.00477786	0.0511519
10341513	---			105.534	48.3479	50.7341	3.90205	2.18281	0.189169	0.213569
10432378	NM_029098	Lmbr1l	limb region 1 like	571.02	262.085	87.2226	33.0064	2.17876	0.0150204	0.0777868
10540705	NM_134159	Il17rc	interleukin 17 receptor C	463.515	213.596	43.4045	1.37923	2.17006	0.00982065	0.0665076
10361787	---			171.863	79.2796	74.416	5.16347	2.16781	0.163063	0.200332
10494781	NM_207205	Igsf3	immunoglobulin superfamily	1672.79	773.241	167.818	35.2716	2.16335	0.0082446	0.0614819
10342905	---			389.877	180.25	171.075	2.30942	2.16298	0.167788	0.202894
10425822	NM_054088	Pnpla3	patatin-like phospholipase domain containing 3	598.8	277.124	89.061	7.17458	2.16076	0.0237052	0.0906998
10381708	NM_019679	Fmnl1	formin-like 1	2506.36	1160.25	358.768	24.9502	2.16018	0.0222134	0.0885024
10405693	NM_029653	Dapk1	death associated protein kinase 1	3166.09	1466.1	124.26	54.943	2.15954	0.000330752	0.0357055
10338135	---			289.279	134.316	135.102	19.6542	2.15372	0.182114	0.210666
10343552	---			101.663	47.2444	19.6133	4.32354	2.15186	0.0336929	0.104027
10478364	NM_001098799	Tox2	TOX high mobility group box family member 2	904.586	420.582	175.446	5.69045	2.1508	0.0409252	0.111311
10561485	NM_027470	Pak4	p21 protein (Cdc42	411.179	191.25	53.1301	22.9867	2.14995	0.00941095	0.0651936
10495623	ENSMUST00000066215	Gm9916	predicted gene 9916	749.462	348.653	122.624	38.5654	2.14959	0.0201251	0.0853177
10418092	BC038501	A830039N20Rik	RIKEN cDNA A830039N20 gene	496.17	231.323	63.0261	28.2007	2.14492	0.00893388	0.0640921
10338641	---			145.657	68.1312	55.224	0.445995	2.13788	0.135563	0.183997
10372844	NM_138956	Rassf3	Ras association (RalGDS	927.214	433.886	124.841	8.56973	2.137	0.0200811	0.0853704
10530563	NM_028194	Fryl	furry homolog-like (Drosophila)	2721.88	1274.04	211.244	29.2749	2.13642	0.00588771	0.0551548
10344115	---			394.212	184.577	176.643	53.4478	2.13576	0.167949	0.202927
10422628	NM_177355	Plcxd3	phosphatidylinositol-specific phospholipase C	1835.29	862.393	131.019	35.756	2.12813	0.00317401	0.0463478
10571815	NM_153581	Gpm6a	glycoprotein m6a	2097.52	986.39	194.961	101.196	2.12646	0.00375321	0.048003
10584142	NM_011808	Ets1	E26 avian leukemia oncogene 1	235.565	111.189	26.5749	0.162888	2.11859	0.0148748	0.0775646
10465521	NM_008874	Plcb3	phospholipase C	7424.64	3513.77	234.118	113.305	2.11301	0.000167586	0.0276303
10497636	---			314.567	149.051	65.0919	7.67989	2.11046	0.04536	0.116522
10415806	---			801.72	380.838	77.2814	1.30932	2.10515	0.0110266	0.0697276
10547531	NM_007544	Bid	BH3 interacting domain death agonist	986.08	470.865	186.377	18.7099	2.09419	0.0392045	0.1102
10487441	NM_010762	Mal	myelin and lymphocyte protein	941.077	451.174	4.14374	53.3556	2.08584	0.0481017	0.119079
10471535	NM_146119	Fam129b	family with sequence similarity 129	1348.14	646.559	85.9848	122.092	2.0851	0.0304962	0.10005
10478936	---			1044.08	501.659	224.179	18.2358	2.08125	0.0512144	0.122407
10344353	---			152.158	73.1239	10.342	18.2539	2.08082	0.0606041	0.131505
10407291	NM_172595	Arl15	ADP-ribosylation factor-like 15	1409.54	677.85	63.9031	15.5147	2.07942	0.00130512	0.0366404
10491272	NM_001134385	Gpr160	G protein-coupled receptor 160	260.64	125.431	38.3284	3.14666	2.07795	0.0247927	0.0922907
10460490	NM_133803	Dpp3	dipeptidylpeptidase 3	208.13	100.272	72.2996	18.7853	2.07566	0.112939	0.169868
10445071	NM_001013745	Zfp57	zinc finger protein 57	246.362	118.956	54.6373	20.5593	2.07104	0.0418044	0.112321
10599962	NM_001081354	Mamld1	mastermind-like domain containing 1	1810.05	875.374	179.15	14.2084	2.06775	0.0114474	0.0706155
10599956	---			387.321	187.48	61.9897	32.4614	2.06593	0.018542	0.0825021
10574438	NM_009868	Cdh5	cadherin 5	102.842	49.798	36.608	3.70812	2.06519	0.126728	0.179082
10428594	NM_177225	Samd12	sterile alpha motif domain containing 12	2199.99	1065.92	249.469	109.62	2.06393	0.00726074	0.0588386
10405432	NM_016758	Rgs14	regulator of G-protein signaling 14	244.534	118.885	50.2701	0.301065	2.05689	0.0494259	0.120482
10344218	---			198.796	96.7037	70.9253	26.8559	2.05572	0.118454	0.173979
10608641	---			2822.37	1373.83	78.3408	51.2461	2.05437	0.000155561	0.0276593
10561247	NM_138676	Shkbp1	Sh3kbp1 binding protein 1	658.548	320.695	142.378	75.8796	2.0535	0.041525	0.111935
10595953	NM_177775	Esyt3	extended synaptotagmin-like protein 3	351.244	171.082	106.632	12.1605	2.05308	0.0969297	0.15903
10546631	NM_145148	Frmd4b	FERM domain containing 4B	1228.95	599.346	177.996	36.9554	2.05049	0.0205209	0.0855164
10339205	---			291.533	142.356	60.7985	27.655	2.04791	0.0364214	0.107685
10338631	---			389.611	190.275	146.918	19.1112	2.04762	0.140028	0.186539
10597477	NM_175380	Gpd1l	glycerol-3-phosphate dehydrogenase 1-like	2151.4	1052.02	274.209	21.4238	2.04501	0.0193479	0.0845526
10530950	NM_001030297	Tmprss11c	transmembrane protease	491.922	240.606	125.724	6.31541	2.04451	0.0737083	0.142483
10581013	NM_009866	Cdh11	cadherin 11	4981.7	2436.78	113.507	114.371	2.04438	0.000874738	0.0334689
10505187	NM_011673	Ugcg	UDP-glucose ceramide glucosyltransferase	2942.96	1442.08	182.908	127.871	2.04077	0.00198968	0.0400053
10340606	---			2816.55	1380.3	372.154	23.5604	2.04053	0.0211261	0.0867233
10338065	---			638.565	312.958	248.35	10.2687	2.04042	0.150809	0.19321
10493820	NM_011313	S100a6	S100 calcium binding protein A6 (calcyclin)	3765.34	1846.03	693.274	160.033	2.03969	0.0333467	0.103628
10557262	NM_146198	Slc5a11	solute carrier family 5 (sodium	158.019	77.7762	22.1391	6.44604	2.03171	0.0164702	0.0795272
10362294	NM_176837	Arhgap18	Rho GTPase activating protein 18	163.224	80.5304	31.8871	1.98404	2.02686	0.0454322	0.116642
10437575	NM_029070	Tmem114	transmembrane protein 114	103.794	51.2646	15.3944	5.14526	2.02468	0.0175828	0.0813888
10379176	NM_011676	Unc119	unc-119 homolog (C. elegans)	1398.38	690.811	154.69	133.334	2.02425	0.0180026	0.0819514
10535956	NM_001163493	Stard13	StAR-related lipid transfer (START) domain containing 13	1906.88	942.155	164.13	22.9277	2.02396	0.00809067	0.0611385
10510422	NM_001159344	Casz1	castor homolog 1	1503.05	745.615	186.111	17.5714	2.01585	0.0184536	0.082351
10483110	NM_027835	Ifih1	interferon induced with helicase C domain 1	274.132	136.091	51.7911	4.31761	2.01433	0.0425962	0.113273
10546476	NM_001029850	Magi1	membrane associated guanylate kinase	3157.93	1569.92	134.939	15.2516	2.01153	0.00204587	0.0403303
10387100	NM_001034874	Shisa6	shisa homolog 6 (Xenopus laevis)	494.345	245.854	111.254	19.4891	2.01072	0.0552887	0.126701
10380761	NM_138657	Socs7	suppressor of cytokine signaling 7	1321.86	658.083	213.785	29.1841	2.00866	0.0300549	0.0994665
10369752	NM_178678	Lrrtm3	leucine rich repeat transmembrane neuronal 3	1423.32	709.207	184.978	132.973	2.00692	0.017033	0.0806132
10404836	NM_183204	Rnf182	ring finger protein 182	356.838	178.041	110.145	5.58855	2.00425	0.106083	0.165115
10486197	NM_145530	Rhov	ras homolog gene family	947.056	473.542	72.3918	39.9963	1.99994	0.00258175	0.0439236
10563685	NM_013643	Ptpn5	protein tyrosine phosphatase	251.115	125.614	18.3103	3.40234	1.9991	0.00516627	0.0524024
10522024	NM_019636	Tbc1d1	TBC1 domain family	1062.47	534.131	57.4249	10.4487	1.98916	0.00275739	0.0446501
10578922	NM_178633	Klhl2	kelch-like 2	792.59	398.81	88.6916	58.6169	1.98739	0.00984602	0.0665799
10342243	---			241.977	121.765	51.3363	10.7508	1.98725	0.0485532	0.119317
10585874	NM_010421	Hexa	hexosaminidase A	2143.78	1078.88	251.353	29.2549	1.98704	0.0165345	0.0795412
10554375	NM_013659	Sema4b	sema domain	1451.61	731.418	99.9642	94.3826	1.98466	0.00848763	0.0622701
10404606	NM_010745	Ly86	lymphocyte antigen 86	5772.31	2910.2	328.973	332.655	1.98347	0.00739499	0.0589778
10441361	NM_001122998	Tiam2	T-cell lymphoma invasion and metastasis 2	273.808	138.206	28.3753	26.4907	1.98117	0.020948	0.0862653
10429691	NM_134087	Fam83h	family with sequence similarity 83	408.671	206.283	57.1645	9.22664	1.98112	0.0222195	0.0884875
10486154	NM_001001982	A430105I19Rik	RIKEN cDNA A430105I19 gene	356.419	179.92	34.9192	23.9409	1.98098	0.00740202	0.0589302
10464688	NM_026720	Ankrd13d	ankyrin repeat domain 13 family	1578.83	797.295	157.027	55.9529	1.98023	0.00656754	0.0571539
10343749	---			327.446	165.448	151.332	7.28465	1.97915	0.204522	0.22179
10530592	NM_028194	Fryl	furry homolog-like (Drosophila)	1823.79	922.589	149.415	42.5968	1.97682	0.00499742	0.0517904
10559644	NM_177887	Tmem150b	transmembrane protein 150B	171.107	86.5859	41.6318	13.7341	1.97616	0.0586671	0.129881
10363545	NM_009719	Neurog3	neurogenin 3	118.136	59.8839	14.8052	4.46884	1.97276	0.0132765	0.0739502
10434932	NM_177632	Fam43a	family with sequence similarity 43	193.964	98.3229	28.3538	8.32872	1.97272	0.0193767	0.0845561
10342942	---			104.644	53.0629	34.433	13.8227	1.97207	0.109851	0.167641
10340510	---			304.911	154.75	117.454	3.97811	1.97035	0.156988	0.196815
10340103	---			159.834	81.1628	60.0021	3.21258	1.9693	0.150573	0.192989
10341744	---			382.996	194.543	171.642	14.5829	1.9687	0.196423	0.21756
10341185	---			4484.9	2278.38	169.444	345.007	1.96846	0.041028	0.111456
10491212	NM_029412	Egfem1	EGF-like and EMI domain containing 1	234.663	119.599	18.0057	11.0349	1.96209	0.00307795	0.0461337
10457054	NM_146090	Zadh2	zinc binding alcohol dehydrogenase	1040.67	531.419	194.421	30.8372	1.95827	0.0410826	0.111438
10362273	NR_028030	Gm9767	predicted gene 9767	175.349	89.6541	42.5017	19.2482	1.95584	0.0583879	0.12958
10518857	NM_133879	Zbtb48	zinc finger and BTB domain containing 48	203.706	104.189	17.8158	7.97729	1.95515	0.00408388	0.0491801
10343543	---			119.97	61.3704	64.1431	5.00538	1.95485	0.253724	0.24594
10485718	NM_001128103	Ano3	anoctamin 3	4965.52	2540.72	204.941	188.005	1.95437	0.00229329	0.0422674
10417787	NM_010315	Gng2	guanine nucleotide binding protein (G protein)	5332.06	2728.71	415.982	101.307	1.95406	0.00525718	0.0528516
10349744	NM_145977	Slc45a3	solute carrier family 45	1054.96	540.001	115.326	1.84845	1.95363	0.0162807	0.0795868
10379190	NM_011707	Vtn	vitronectin	112.88	57.7968	23.7195	2.9007	1.95305	0.0537702	0.125119
10339905	---			159.928	81.9739	39.7259	0.0147242	1.95096	0.0767345	0.145085
10372528	NM_021452	Kcnmb4	potassium large conductance calcium-activated channel	574.982	295.034	86.6801	76.0398	1.94887	0.042501	0.113253
10342495	---			1270.19	652.228	503.071	94.5009	1.94746	0.161889	0.199566
10404792	NM_198419	Phactr1	phosphatase and actin regulator 1	2505.46	1288.46	160.921	56.2207	1.94453	0.00228111	0.0422145
10341161	---			134.091	68.9581	47.1489	6.04982	1.94453	0.136009	0.184382
10541695	NM_145130	Lpcat3	lysophosphatidylcholine acyltransferase 3	2766.45	1423.31	375.511	107.987	1.94368	0.0171062	0.0805393
10426467	NM_178789	Tmem117	transmembrane protein 117	1997.06	1027.5	155.753	45.3357	1.9436	0.00454103	0.0508372
10448235	NM_001110254	A630033E08Rik	RIKEN cDNA A630033E08 gene	627.991	323.232	52.7584	24.5929	1.94285	0.00365177	0.0476465
10413152	NM_028275	1700112E06Rik	RIKEN cDNA 1700112E06 gene	257.688	132.647	61.0461	11.7424	1.94267	0.0644435	0.135303
10338633	---			332.272	171.133	118.449	15.1716	1.94161	0.1395	0.186301
10563709	NM_153095	Mrgpra1	MAS-related GPR	493.715	254.326	97.701	0.440239	1.94127	0.0512841	0.122477
10563712	NM_001172588	Mrgpra2a	MAS-related GPR	290.432	149.833	42.0594	5.32446	1.93837	0.0262571	0.0945212
10416406	NM_172812	Htr2a	5-hydroxytryptamine (serotonin) receptor 2A	1609.99	830.596	42.3249	0.810735	1.93836	0.000976034	0.0329021
10485213	NM_007656	Cd82	CD82 antigen	5050.85	2606.1	109.368	145.767	1.93809	0.00425724	0.0498124
10338601	---			2990.69	1543.66	337.379	4.01619	1.93741	0.0176248	0.0814586
10461423	NM_021890	Fads3	fatty acid desaturase 3	3184.14	1644.66	224.313	293.57	1.93606	0.031538	0.10127
10519913	NM_001170746	Magi2	membrane associated guanylate kinase	477.329	246.994	51.3301	44.8275	1.93255	0.0196224	0.0848929
10343475	---			172.993	89.5382	67.4979	14.8877	1.93206	0.15884	0.197851
10571207	NM_025869	Dusp26	dual specificity phosphatase 26 (putative)	2464.11	1277.14	184.43	7.89014	1.92939	0.00782023	0.060662
10532921	NM_029012	Sppl3	signal peptide peptidase 3	181.526	94.1572	67.9693	4.37414	1.92791	0.155092	0.195956
10466248	NM_001025307	Stx3	syntaxin 3	479.531	248.763	19.4401	31.2783	1.92767	0.0249388	0.0924172
10474860	NM_028117	Chst14	carbohydrate (N-acetylgalactosamine 4-0) sulfotransferase 14	616.009	319.643	98.3897	19.4207	1.92718	0.0293448	0.0981915
10410460	NM_001145162	Ube2ql1	ubiquitin-conjugating enzyme E2Q family-like 1	3532.34	1835.14	367.832	24.4543	1.92483	0.0148218	0.0773772
10461369	NM_009643	Ahnak	AHNAK nucleoprotein (desmoyokin)	1362.17	708.757	59.2644	66.8556	1.92192	0.00731844	0.0589375
10544002	NM_178661	Creb3l2	cAMP responsive element binding protein 3-like 2	470.962	245.106	45.7469	31.0304	1.92146	0.00772082	0.0604076
10339611	---			366.821	191.087	44.4827	27.7762	1.91965	0.0124075	0.0722616
10534168	NM_177047	Auts2	autism susceptibility candidate 2	1198.4	624.535	174.3	12.6778	1.91887	0.0285872	0.0972352
10405994	NM_138596	Med10	mediator of RNA polymerase II transcription	2433.2	1268.27	58.1968	76.1509	1.91852	0.00473859	0.0510934
10381994	NM_001037712	Kcnh6	potassium voltage-gated channel	1443.65	752.615	92.7565	121.321	1.91818	0.0272846	0.0954539
10414360	NM_001145953	Lgals3	lectin	700.982	365.709	212.543	160.461	1.91677	0.145178	0.189748
10569848	NM_011503	Stxbp2	syntaxin binding protein 2	460.915	240.873	60.079	54.103	1.91351	0.0343241	0.104975
10338800	---			1435.23	751.592	200.509	63.9518	1.90958	0.0180719	0.0820199
10388451	NM_138950	Wdr81	WD repeat domain 81	784.953	411.149	70.5542	42.2315	1.90917	0.00512319	0.0522577
10526838	NM_010325	Got2	glutamate oxaloacetate transaminase 2	1437	753.474	601.429	64.6642	1.90716	0.186003	0.212427
10340319	---			2219.67	1164.4	266.197	11.0169	1.90628	0.0203361	0.0854533
10516221	---			139.207	73.0722	40.6843	11.1951	1.90507	0.0953844	0.15827
10505643	BC039810	4930473A06Rik	RIKEN cDNA 4930473A06 gene	214.07	112.442	25.4834	0.135085	1.90383	0.0203183	0.0854971
10342053	---			7263	3814.96	271.455	340.393	1.90382	0.00890904	0.0640152
10341198	---			122.154	64.1932	28.582	11.7137	1.90292	0.0572539	0.128192
10338827	---			116.772	61.4559	56.6459	5.90372	1.90009	0.231497	0.235338
10418410	NM_011103	Prkcd	protein kinase C	6364.92	3351.41	135.932	16.112	1.89918	0.00054003	0.0360073
10603627	NM_029510	Bcor	BCL6 interacting corepressor	244.41	128.89	78.471	11.2892	1.89627	0.12154	0.175777
10338769	---			137.072	72.29	49.7538	24.7765	1.89614	0.151443	0.193584
10343021	---			287.31	151.615	136.119	37.7898	1.895	0.221623	0.230679
10497237	NM_001195031	Pag1	phosphoprotein associated with glycosphingolipid microdomains 1	338.97	178.908	68.6087	24.251	1.89466	0.0423413	0.11306
10357288	NM_010483	Htr5b	5-hydroxytryptamine (serotonin) receptor 5B	610.385	322.512	128.293	41.2608	1.89259	0.0473667	0.118554
10399696	NM_001081977	Rnf144a	ring finger protein 144A	1569.66	830.074	306.744	41.2991	1.89099	0.0495147	0.120569
10501374	NM_001033304	5330417C22Rik	RIKEN cDNA 5330417C22 gene	1063.23	562.308	156.751	78.9432	1.89083	0.018719	0.0829232
10399337	NM_001164493	Klhl29	kelch-like 29 (Drosophila)	1315.44	695.961	50.8407	43.0794	1.89011	0.00143853	0.0372704
10601857	NM_009750	Ngfrap1	nerve growth factor receptor (TNFRSF16) associated protein 1	5562.07	2943.14	113.974	51.1708	1.88984	7.36468e-05	0.0278262
10576569	NM_145608	BC021891	cDNA sequence BC021891	120.5	63.7812	11.1426	4.6504	1.88928	0.0054893	0.0538129
10490621	NM_011481	Srms	src-related kinase lacking C-terminal regulatory tyrosine and N-terminal myristylation sites	122.443	64.8145	19.2921	12.9119	1.88913	0.0290908	0.0978833
10506225	NM_198037	Cachd1	cache domain containing 1	1109.84	587.592	96.9775	37.3886	1.8888	0.00500875	0.0517304
10360418	NM_011880	Rgs7	regulator of G protein signaling 7	3311.86	1753.82	160.426	45.0584	1.88837	0.00161265	0.0385845
10385518	NM_011579	Tgtp1	T-cell specific GTPase 1	108.321	57.4124	55.3603	3.07092	1.88673	0.251866	0.245004
10452613	NM_172964	Arhgap28	Rho GTPase activating protein 28	2441.88	1296.32	85.7316	105.107	1.8837	0.00733889	0.0590498
10340176	---			267.731	142.237	27.3871	7.08954	1.88229	0.0102942	0.0674969
10343144	---			291.886	155.123	127.999	42.175	1.88164	0.199774	0.219449
10341222	---			163.805	87.0846	35.7686	3.20578	1.88099	0.063786	0.134452
10344031	---			138.173	73.4657	60.2313	10.9454	1.88079	0.199761	0.219461
10563715	NM_153101	Mrgpra2b	MAS-related GPR	4748.79	2527.33	156.671	65.0992	1.87898	0.00032786	0.0358197
10582303	NM_007806	Cyba	cytochrome b-245	162.809	86.6664	84.9372	19.971	1.87857	0.257773	0.247904
10604523	NM_172413	Rap2c	RAP2C	1073.43	571.739	156.193	79.588	1.87749	0.0185305	0.082491
10341666	---			132.066	70.4183	47.5703	17.2923	1.87546	0.144167	0.189246
10340994	---			158.11	84.3082	54.6131	40.8874	1.87537	0.189195	0.213572
10395466	NM_172803	Dock4	dedicator of cytokinesis 4	1501.48	801.745	180.612	100.155	1.87276	0.0115718	0.070805
10343384	---			1489.97	795.706	716.826	26.4773	1.87251	0.235258	0.236772
10344055	---			470.056	251.054	24.2889	46.3226	1.87233	0.0576232	0.128638
10544638	AB052758	Tra2a	transformer 2 alpha homolog (Drosophila)	276.646	147.866	78.7868	41.9141	1.87093	0.0988095	0.159915
10408083	NM_178207	Hist1h3i	histone cluster 1	473.666	253.371	189.506	13.6888	1.86946	0.18078	0.209872
10451061	NM_001146038	Runx2	runt related transcription factor 2	197.95	105.888	5.10045	13.5067	1.86944	0.0469503	0.11823
10344117	---			226.388	121.12	67.7284	3.07032	1.86911	0.114278	0.17072
10348645	NM_022320	Gpr35	G protein-coupled receptor 35	1023.49	549.015	32.6425	17.1472	1.86424	0.000241699	0.0313104
10446771	NM_001081071	Lclat1	lysocardiolipin acyltransferase 1	4407.98	2365.56	249.051	91.4155	1.8634	0.00173557	0.0391495
10584047	NM_013906	Adamts8	a disintegrin-like and metallopeptidase (reprolysin type) with thrombospondin type 1 motif	430.776	231.271	96.4822	5.23069	1.86265	0.0692626	0.138893
10340096	---			377.506	202.761	44.4112	34.031	1.86183	0.0188206	0.0832108
10450920	AY036118	AY036118	cDNA sequence AY036118	794.215	426.908	466.872	73.0575	1.86039	0.305048	0.272181
10579043	NM_199364	Lzts1	leucine zipper	1360.21	731.177	130.763	45.9889	1.8603	0.00724022	0.05883
10462623	NM_008331	Ifit1	interferon-induced protein with tetratricopeptide repeats 1	1655.96	890.367	413.185	21.543	1.85986	0.0843157	0.150093
10343353	---			1048.25	563.64	243.057	22.3386	1.85979	0.072829	0.14172
10374578	NM_028672	Fam161a	family with sequence similarity 161	161.838	87.0403	16.1515	4.70623	1.85934	0.00923078	0.0647869
10419854	NM_016972	Slc7a8	solute carrier family 7 (cationic amino acid transporter	1508.1	812.071	233.491	69.3732	1.8571	0.0256325	0.0934602
10488709	NM_001134300	8430427H17Rik	RIKEN cDNA 8430427H17 gene	1224.82	659.953	71.7977	44.5802	1.85592	0.00171395	0.0389526
10408246	NM_013550	Hist1h3a	histone cluster 1	2503.67	1349.88	1129.26	200.286	1.85473	0.215265	0.227535
10487847	BC071212	1700037H04Rik	RIKEN cDNA 1700037H04 gene	2240.14	1208.45	19.1877	78.6262	1.85373	0.0281836	0.0965868
10477970	NM_009271	Src	Rous sarcoma oncogene	912.261	493.464	40.7563	52.1774	1.84869	0.0142749	0.0765038
10585889	NM_175235	Celf6	CUGBP	1353.82	732.667	119.323	0.00872867	1.84779	0.0120783	0.0714924
10433445	NM_172961	Abat	4-aminobutyrate aminotransferase	2973.07	1611.36	101.961	70.6033	1.84507	0.000478694	0.0367864
10338064	---			220.097	119.328	112.05	9.48136	1.84447	0.258884	0.248472
10339479	---			213.152	115.573	57.5327	18.1311	1.84431	0.0861956	0.151506
10446596	NM_177639	Dlgap1	discs	1061.62	576.274	100.486	40.6932	1.84221	0.00644521	0.0568532
10494945	NM_018800	Syt6	synaptotagmin VI	2148.9	1166.72	131.669	26.7936	1.84183	0.00405188	0.0492526
10382713	NM_001005608	Itgb4	integrin beta 4	318.848	173.182	40.3501	7.73933	1.84111	0.0202362	0.0853893
10529875	NM_001077398	Ldb2	LIM domain binding 2	6848.89	3721.94	349.699	113.201	1.84014	0.00163986	0.0387246
10338925	---			136.245	74.0607	15.1555	31.7185	1.83964	0.184566	0.211586
10547976	NM_145391	Tapbpl	TAP binding protein-like	610.372	332.174	19.6843	31.1197	1.83751	0.0180726	0.0819821
10485828	NM_133648	Slc12a6	solute carrier family 12	312.565	170.124	135.14	34.0122	1.83728	0.203856	0.221412
10366043	NM_026268	Dusp6	dual specificity phosphatase 6	1483.35	808.09	300.297	34.5209	1.83563	0.0574736	0.128494
10585048	NM_207675	Cadm1	cell adhesion molecule 1	5197.49	2832.34	280.863	11.7802	1.83505	0.00458076	0.0508425
10344472	---			1279.87	697.903	576.115	69.3977	1.83388	0.220424	0.229959
10559820	NM_172738	5730403M16Rik	RIKEN cDNA 5730403M16 gene	1142.2	624.837	72.7055	33.4929	1.82801	0.00203754	0.0402536
10499493	NM_008227	Hcn3	hyperpolarization-activated	617.39	337.946	81.0224	19.835	1.82689	0.0201974	0.0853448
10500345	NR_001579	Terc	telomerase RNA component	419.522	230.019	219.302	1.90944	1.82386	0.27314	0.255739
10341372	---			299.217	164.098	48.8767	56.1491	1.82341	0.108555	0.166843
10398240	NM_001043335	Eml1	echinoderm microtubule associated protein like 1	6109.77	3354.9	135.461	89.5794	1.82115	0.000121378	0.0289646
10340478	---			112.904	61.9973	57.5156	14.7003	1.82111	0.262368	0.250253
10583316	BC056964	Taf1d	TATA box binding protein (Tbp)-associated factor	481.699	264.668	92.7825	79.627	1.82001	0.0812623	0.148566
10523758	NM_001033550	Lrrc8b	leucine rich repeat containing 8 family	4645.9	2553.19	352.286	19.1052	1.81964	0.0090809	0.0643828
10437580	---			136.504	75.0274	42.8018	2.69225	1.81939	0.129826	0.181061
10468909	NM_026866	Disp1	dispatched homolog 1 (Drosophila)	542.452	298.467	64.6247	29.6794	1.81746	0.0118719	0.0713418
10338977	---			151.561	83.395	21.5447	8.82206	1.81739	0.0193937	0.0845491
10494405	NM_178215	Hist2h3b	histone cluster 2	2890.58	1590.73	1237.37	182.519	1.81714	0.207609	0.223348
10375713	NM_145926	Mgat4b	mannoside acetylglucosaminyltransferase 4	1285.81	707.887	108.557	54.4866	1.8164	0.00454279	0.0507941
10344461	---			198.352	109.203	104.248	43.1498	1.81636	0.284315	0.26153
10490777	NM_030708	Zfhx4	zinc finger homeodomain 4	652.662	359.806	75.831	34.7016	1.81392	0.011173	0.0701152
10408202	NM_178205	Hist1h3e	histone cluster 1	1707.9	942.33	730.294	117.899	1.81242	0.207808	0.22343
10342744	---			989.497	546.002	381.924	125.328	1.81226	0.174267	0.206246
10428302	NM_013692	Klf10	Kruppel-like factor 10	647.629	357.456	49.4437	36.96	1.81177	0.00613885	0.0558906
10472212	NM_026361	Pkp4	plakophilin 4	1027.35	567.221	35.1529	43.5927	1.81121	0.00802697	0.0609109
10483249	NM_015736	Galnt3	UDP-N-acetyl-alpha-D-galactosamine:polypeptide N-acetylgalactosaminyltransferase 3	321.287	177.471	32.5648	12.4562	1.81036	0.00847407	0.0623219
10606910	NM_001082412	Mcart6	mitochondrial carrier triple repeat 6	1678.71	927.966	171.156	151.839	1.80902	0.0217251	0.0876739
10454192	NM_013697	Ttr	transthyretin	100.459	55.5374	9.1155	4.20676	1.80886	0.00571347	0.0550582
10373702	NR_003517	Pisd-ps1	phosphatidylserine decarboxylase	930.752	514.878	105.618	61.2434	1.80771	0.0114755	0.0706929
10498187	NM_177854	6030405A18Rik	RIKEN cDNA 6030405A18 gene	511.362	283.067	32.0892	16.9633	1.8065	0.00198247	0.0401274
10521709	NM_024434	Lap3	leucine aminopeptidase 3	1960.21	1085.19	138.595	8.07726	1.80632	0.0080112	0.0609442
10341210	---			128.286	71.0328	58.4397	1.293	1.80601	0.231744	0.235378
10341147	---			165.953	91.9766	58.5994	5.85565	1.8043	0.158489	0.197713
10339119	---			139.541	77.3581	54.1002	12.0019	1.80383	0.178735	0.208916
10399973	NM_024124	Hdac9	histone deacetylase 9	1503.01	833.762	145.564	12.3249	1.80268	0.0146412	0.0771001
10344326	---			106.274	58.9701	35.4355	6.18526	1.80216	0.141764	0.187612
10505839	NM_172871	Klhl9	kelch-like 9 (Drosophila)	289.108	160.45	125.187	12.196	1.80185	0.215708	0.227765
10439612	NM_172506	Boc	biregional cell adhesion molecule-related	1351.46	750.273	276.599	81.5584	1.80129	0.0519517	0.12297
10340761	---			252.685	140.314	62.5963	35.7592	1.80086	0.0841221	0.150102
10342914	---			130.518	72.4832	40.6533	23.8943	1.80067	0.138445	0.185466
10340438	---			765.665	425.285	340.48	15.4123	1.80036	0.225208	0.232436
10575763	NM_001081151	Gan	giant axonal neuropathy	1246.17	692.507	104.227	69.8945	1.79951	0.00614375	0.0558792
10389816	NM_028011	Tom1l1	target of myb1-like 1 (chicken)	733.821	407.843	60.6843	7.36267	1.79927	0.0101151	0.0671477
10507677	NM_010657	Hivep3	human immunodeficiency virus type I enhancer binding protein 3	729.571	406.481	73.7674	17.4872	1.79485	0.0120499	0.0715107
10500911	NM_001163440	Mov10	Moloney leukemia virus 10	392.507	218.924	42.8429	21.7394	1.79289	0.00981133	0.0665438
10538290	NM_028035	Snx10	sorting nexin 10	1328.5	741.226	109.691	78.3022	1.79231	0.00694856	0.0580733
10575213	NM_007496	Zfhx3	zinc finger homeobox 3	2158.62	1205.35	117.903	1.46059	1.79086	0.00505233	0.0518264
10519983	NM_008013	Fgl2	fibrinogen-like protein 2	165.946	92.7024	72.4445	21.555	1.79009	0.217132	0.228338
10341417	---			114.891	64.1973	58.844	25.3009	1.78966	0.283424	0.260949
10560474	NM_177691	Ppm1n	protein phosphatase	141.305	78.9928	16.6606	11.2276	1.78883	0.0162904	0.0795486
10353221	NM_177781	Trpa1	transient receptor potential cation channel	2478.72	1386.45	297.708	84.8308	1.78782	0.0162098	0.0796265
10409282	NM_013846	Ror2	receptor tyrosine kinase-like orphan receptor 2	626.626	350.534	35.8208	0.321547	1.78763	0.00555968	0.0541516
10511901	NM_001012450	Ankrd6	ankyrin repeat domain 6	775.011	433.563	46.8805	6.91408	1.78754	0.0050663	0.0518523
10571705	NM_008391	Irf2	interferon regulatory factor 2	1106.03	619.09	85.8928	6.90127	1.78654	0.00967989	0.0659979
10341695	---			230.189	128.929	90.8253	8.67244	1.78539	0.191769	0.214846
10554094	NM_010513	Igf1r	insulin-like growth factor I receptor	2008.59	1126.23	208.669	0.313276	1.78346	0.0181366	0.082108
10506714	NR_033496	Lrp8	low density lipoprotein receptor-related protein 8	1260.73	707.47	119.269	46.4319	1.78202	0.0073653	0.0589484
10464704	NM_130863	Adrbk1	adrenergic receptor kinase	4485.3	2517.59	316.073	181.744	1.78158	0.00307547	0.0461728
10526754	NM_021392	Ap4m1	adaptor-related protein complex AP-4	1231.52	692.108	185.108	10.8105	1.77937	0.0364959	0.107694
10485745	NM_001128103	Ano3	anoctamin 3	6131.21	3446.1	373.049	177.73	1.77917	0.00193871	0.039955
10435388	NM_001012765	Adcy5	adenylate cyclase 5	1253.21	705.119	85.0152	89.3408	1.7773	0.016499	0.0794548
10339637	---			122.609	69.0132	7.57117	7.13146	1.77661	0.00875737	0.0631757
10342262	---			1390.26	782.612	439.011	12.2593	1.77644	0.138529	0.185524
10556067	NM_021889	Syt9	synaptotagmin IX	4021.89	2264.21	189.684	75.1224	1.77628	0.00113368	0.0349666
10408072	NM_178182	Hist1h2ai	histone cluster 1	665.056	375.103	307.499	114.057	1.773	0.244004	0.240922
10358583	NM_001024720	Hmcn1	hemicentin 1	194.565	109.744	40.062	18.0896	1.7729	0.0520365	0.123042
10538299	NM_010452	Hoxa3	homeobox A3	310.598	175.201	37.5464	19.7155	1.77281	0.0136873	0.0753133
10340307	---			251.449	141.84	141.758	15.1394	1.77277	0.311801	0.275281
10559580	NM_016908	Syt5	synaptotagmin V	5217.22	2946.75	470.634	158.486	1.7705	0.00744742	0.0590842
10518300	NM_011610	Tnfrsf1b	tumor necrosis factor receptor superfamily	198.517	112.157	23.5781	10.6951	1.76998	0.012904	0.0734089
10534889	NM_178162	Agfg2	ArfGAP with FG repeats 2	1466.76	829.013	91.7328	108.999	1.76929	0.0222415	0.0884975
10462113	NM_177034	Apba1	amyloid beta (A4) precursor protein binding	5640.98	3189.5	295.958	101.646	1.76861	0.00184269	0.03969
10546567	BC048939	A130022J15Rik	RIKEN cDNA A130022J15 gene	813.474	460.242	142.642	89.1591	1.76749	0.0426594	0.113342
10460057	NM_001081300	Tshz1	teashirt zinc finger family member 1	447.972	253.462	100.292	15.7556	1.76742	0.0735724	0.142493
10342782	---			1402.04	793.385	154.218	28.9066	1.76716	0.0168898	0.0802288
10460237	NM_019449	Unc93b1	unc-93 homolog B1 (C. elegans)	176.009	99.6831	6.69431	1.34588	1.76568	0.00159484	0.0387722
10479607	NM_023684	Lime1	Lck interacting transmembrane adaptor 1	377.853	214.186	49.0326	18.2573	1.76413	0.0175713	0.0814603
10454235	NM_001167777	Asxl3	additional sex combs like 3 (Drosophila)	606.966	344.257	73.1621	27.8318	1.76312	0.0144697	0.0768216
10562905	NM_030693	Atf5	activating transcription factor 5	619.415	351.671	72.6912	13.0513	1.76135	0.0198371	0.0851717
10344057	---			208.554	118.461	97.6794	28.3301	1.76053	0.248295	0.2432
10555205	NM_201352	Gdpd5	glycerophosphodiester phosphodiesterase domain containing 5	2293.41	1304.18	177.586	96.2283	1.75851	0.00406983	0.0492069
10531610	NM_145839	Rasgef1b	RasGEF domain family	362.531	206.686	74.3983	34.9292	1.75402	0.0537288	0.125055
10341332	---			729.128	415.806	314.141	95.6085	1.75353	0.221736	0.230744
10338796	---			109.442	62.46	30.2343	4.46764	1.75219	0.110521	0.168127
10565218	NM_010551	Il16	interleukin 16	128.084	73.1503	32.1772	1.75087	1.75097	0.0972181	0.159215
10501754	NM_177664	D3Bwg0562e	DNA segment	519.101	296.577	136.316	18.0463	1.75031	0.102108	0.1621
10416657	NM_007920	Elf1	E74-like factor 1	496.604	283.978	43.4982	23.9893	1.74874	0.00598242	0.0555826
10462618	NM_010501	Ifit3	interferon-induced protein with tetratricopeptide repeats 3	750.487	429.301	170.084	0.372993	1.74816	0.0821227	0.148968
10354677	NM_001081433	Ankrd44	ankyrin repeat domain 44	264.401	151.264	28.7821	21.3993	1.74795	0.017539	0.0814356
10389072	NM_009839	Cct6b	chaperonin containing Tcp1	110.912	63.486	12.4166	9.47965	1.74703	0.0201177	0.0853261
10343563	---			483.904	277.125	74.1716	19.7627	1.74616	0.0311876	0.101075
10478776	NM_001085495	Arfgef2	ADP-ribosylation factor guanine nucleotide-exchange factor 2 (brefeldin A-inhibited)	1757.71	1006.69	189.774	73.1765	1.74603	0.0112015	0.0700039
10526656	NM_146164	Lrch4	leucine-rich repeats and calponin homology (CH) domain containing 4	711.093	407.741	42.9955	38.8964	1.74398	0.00750983	0.0593715
10568115	NM_080638	Mvp	major vault protein	847.069	485.8	66.0241	62.1215	1.74366	0.0158	0.078939
10439881	NR_028300	5330426P16Rik	RIKEN cDNA 5330426P16 gene	1971.73	1132.47	169.713	72.8244	1.74109	0.00583992	0.0552781
10376832	NM_007413	Adora2b	adenosine A2b receptor	231.221	132.865	17.5813	11.5098	1.74027	0.00505584	0.0518038
10399908	NM_011158	Prkar2b	protein kinase	5815.92	3344.85	380.575	46.3117	1.73877	0.00684546	0.0579054
10340988	---			222.378	127.926	57.0935	38.7831	1.73834	0.11718	0.172667
10445702	NM_198421	Usp49	ubiquitin specific peptidase 49	301.725	173.618	41.7455	21.2758	1.73787	0.0209333	0.0862442
10408767	NM_134060	Slc35b3	solute carrier family 35	411.106	236.602	61.9671	42.8228	1.73754	0.0355748	0.106642
10426650	NM_009448	Tuba1c	tubulin	236.516	136.311	66.2393	19.4241	1.73511	0.108721	0.167013
10358555	NM_001024720	Hmcn1	hemicentin 1	151.394	87.305	31.593	5.16117	1.73408	0.0672693	0.137387
10569437	NM_009434	Phlda2	pleckstrin homology-like domain	471.787	272.077	102.734	0.486559	1.73402	0.078019	0.146173
10427253	NM_001163643	Map3k12	mitogen-activated protein kinase kinase kinase 12	155.773	89.8557	48.1749	13.6884	1.7336	0.131273	0.182156
10339415	---			2041.27	1180.31	227.201	35.4768	1.72945	0.0194831	0.0847351
10464560	NM_026316	Aldh3b1	aldehyde dehydrogenase 3 family	653.97	378.187	64.1462	40.0183	1.72922	0.00979546	0.066486
10484488	NM_145526	P2rx3	purinergic receptor P2X	7909.07	4576.56	204.883	109.209	1.72817	0.000173031	0.0270526
10606016	NM_013563	Il2rg	interleukin 2 receptor	202.663	117.535	66.7572	52.9955	1.72428	0.22076	0.230151
10511888	---			198.62	115.226	13.2761	5.98572	1.72375	0.00293235	0.0458457
10380489	NM_146025	Samd14	sterile alpha motif domain containing 14	2987.54	1733.45	466.178	213.728	1.72347	0.0289217	0.0977494
10539342	NM_133641	Rtkn	rhotekin	833.845	484.01	61.2422	21.2435	1.72278	0.00473058	0.0510678
10342533	---			153.899	89.4026	8.81857	27.1097	1.72142	0.164367	0.200765
10583314	BC056964	Taf1d	TATA box binding protein (Tbp)-associated factor	580.13	337.053	130.32	31.451	1.72118	0.0743942	0.142986
10413482	NM_009524	Wnt5a	wingless-related MMTV integration site 5A	574.88	334.232	96.6761	46.4175	1.72	0.0354105	0.106466
10524889	NM_001114545	Ksr2	kinase suppressor of ras 2	696.29	404.841	115.639	15.8451	1.71991	0.0453376	0.116498
10586781	NM_181072	Myo1e	myosin IE	3453.09	2009.76	248.566	31.6418	1.71816	0.00851959	0.0623532
10569656	NM_146206	Tpcn2	two pore segment channel 2	334.41	194.638	10.3171	2.49323	1.71811	0.000888137	0.0331425
10342134	---			260.756	151.937	160.553	2.29092	1.71622	0.361276	0.297715
10341357	---			417.428	243.255	38.6499	50.6684	1.71601	0.0649246	0.135622
10425808	NM_009775	Tspo	translocator protein	353.26	205.873	52.6689	31.763	1.71591	0.0300397	0.0994887
10422436	NM_001081039	Dock9	dedicator of cytokinesis 9	1503.94	877.727	122.23	50.5703	1.71345	0.00542515	0.053415
10357300	NM_199021	Dpp10	dipeptidylpeptidase 10	2804.91	1637.83	228.697	29.658	1.71257	0.0110644	0.0698688
10342598	---			615.931	359.719	147.779	90.9124	1.71225	0.0963367	0.158862
10542822	NM_025620	Rep15	RAB15 effector protein	116.615	68.1259	16.2858	16.5551	1.71176	0.07221	0.141151
10570278	---			193.59	113.142	17.9577	4.38181	1.71104	0.011257	0.0700604
10408094	NM_001177544	Hist1h2ao	histone cluster 1	221.54	129.524	83.6796	53.1004	1.71041	0.230408	0.234758
10358577	NM_001024720	Hmcn1	hemicentin 1	333.033	194.787	47.6468	13.8524	1.70973	0.0275234	0.0958455
10412123	NM_010877	Ncf2	neutrophil cytosolic factor 2	120.441	70.4705	6.79528	2.59849	1.7091	0.00220627	0.0412504
10607113	NM_134257	Rgs3	regulator of G-protein signaling 3	3683.7	2155.41	192.113	149.626	1.70905	0.00309223	0.0458925
10343396	---			1410.05	825.145	128.258	56.0867	1.70885	0.00721302	0.058767
10409365	NM_012014	Gprin1	G protein-regulated inducer of neurite outgrowth 1	182.734	106.962	33.4183	13.0609	1.7084	0.0443601	0.115128
10493137	NM_001033484	Iqgap3	IQ motif containing GTPase activating protein 3	164.225	96.1689	21.6407	0.667252	1.70767	0.0319349	0.101859
10529937	NM_030265	Kcnip4	Kv channel interacting protein 4	7454.75	4367.72	279.346	85.5956	1.70678	0.00104223	0.0343671
10395978	BC099503	Gm527	predicted gene 527	866.465	508.365	47.6083	20.7334	1.70441	0.00181599	0.0396804
10461844	NM_008139	Gnaq	guanine nucleotide binding protein	6117.13	3589.24	260.763	127.974	1.7043	0.000810504	0.0331066
10606730	NM_001007578	Armcx6	armadillo repeat containing	709.524	416.328	86.883	23.521	1.70424	0.0201935	0.0853681
10340190	---			141.861	83.3199	17.869	4.92927	1.7026	0.0213982	0.0872868
10419779	NM_145462	Haus4	HAUS augmin-like complex	541.289	318.069	33.2073	9.49735	1.7018	0.00383915	0.0484192
10495621	NR_029551	Mir137	microRNA 137	120.638	70.8996	35.383	7.80893	1.70154	0.127621	0.179673
10341023	---			107.895	63.4327	6.56908	27.041	1.70094	0.248144	0.243104
10400170	NM_008858	Prkd1	protein kinase D1	824.384	485.008	110.829	24.4876	1.69973	0.0273026	0.0954066
10338082	---			117.901	69.377	49.7996	12.1875	1.69942	0.229257	0.234427
10570432	NR_028079	Snora3	small nucleolar RNA	331.302	194.976	184.536	12.0287	1.6992	0.328884	0.283652
10576246	NM_011295	Rps12	ribosomal protein S12	561.459	330.817	199.25	38.7451	1.69719	0.177703	0.208381
10338992	---			148.625	87.6042	19.5743	9.19948	1.69655	0.019773	0.085098
10549615	NM_172736	Leng8	leukocyte receptor cluster (LRC) member 8	924.416	544.954	88.3134	48.2691	1.69632	0.00857804	0.0623782
10350128	NM_173437	Nav1	neuron navigator 1	125.911	74.2381	14.2861	9.5177	1.69604	0.0174637	0.0812523
10339653	---			6043.63	3566.2	233.819	73.7897	1.6947	0.00110839	0.0350204
10343664	---			103.951	61.3637	27.6623	10.7112	1.69401	0.103745	0.163326
10339430	---			187.073	110.553	68.8014	9.08179	1.69215	0.191306	0.214672
10338616	---			101.741	60.1438	31.8639	6.04603	1.69163	0.146409	0.190452
10434808	NM_175165	Tprg	transformation related protein 63 regulated	120.01	70.9695	18.0052	6.98263	1.69101	0.0286328	0.0972807
10511258	NM_026125	Fam132a	family with sequence similarity 132	1135.33	671.437	131.84	120.862	1.69089	0.0393812	0.110321
10408200	NM_175655	Hist1h4f	histone cluster 1	297.093	175.728	146.182	14.8262	1.69064	0.286244	0.262665
10581069	ENSMUST00000060171	Gm9853	predicted gene 9853	574.824	340.211	70.9621	28.7594	1.68961	0.017389	0.0811128
10342216	---			117.662	69.7017	15.5141	4.83528	1.68807	0.0230456	0.0894214
10355763	NM_001003917	Atg9a	autophagy-related 9A (yeast)	1987.21	1177.24	79.0261	13.6903	1.68802	0.00225183	0.0418435
10338258	---			208.98	123.863	18.3887	41.1699	1.68719	0.177086	0.207953
10536494	NM_016900	Cav2	caveolin 2	1140.47	676.223	25.2706	71.8853	1.68652	0.0522027	0.123275
10430113	NM_001168288	Arhgap39	Rho GTPase activating protein 39	2573.75	1526.79	227.467	98.7725	1.68572	0.00705614	0.0584338
10338241	---			111.504	66.1792	64.4448	9.37329	1.68488	0.347049	0.291581
10565250	NM_030705	Mesdc1	mesoderm development candidate 1	421.489	250.236	27.7954	25.3994	1.68437	0.0107848	0.0689192
10475800	NM_009633	Adra2b	adrenergic receptor	133.934	79.6047	28.6467	24.4341	1.68249	0.121841	0.176016
10494565	NM_001161765	Fmo5	flavin containing monooxygenase 5	523.802	311.652	123.417	0.0920618	1.68073	0.0967195	0.158886
10340214	---			265.279	157.962	13.1401	63.0868	1.67939	0.242885	0.240445
10346255	NM_145517	Ormdl1	ORM1-like 1 (S. cerevisiae)	345.711	205.946	38.2955	32.1552	1.67865	0.0286613	0.097341
10451104	NM_001013749	Tmem151b	transmembrane protein 151B	667.067	397.528	82.8018	2.52736	1.67804	0.0298983	0.0993104
10486061	NM_011246	Rasgrp1	RAS guanyl releasing protein 1	6255.08	3727.93	161.978	135.679	1.6779	0.000715447	0.0339669
10454445	NM_026165	Slc25a46	solute carrier family 25	299.504	178.557	107.247	50.0702	1.67736	0.191608	0.214825
10425761	---			237.878	141.836	80.1109	18.3251	1.67713	0.166784	0.202246
10593483	NM_007996	Fdx1	ferredoxin 1	222.506	132.678	38.363	3.64432	1.67704	0.0540026	0.125402
10340219	---			7504.22	4478.62	408.984	33.7751	1.67556	0.00564415	0.0547392
10568873	NM_007403	Adam8	a disintegrin and metallopeptidase domain 8	399.526	238.448	137.788	100.519	1.67553	0.233047	0.235882
10338067	---			587.251	350.559	231.373	50.5497	1.67519	0.213842	0.226772
10340742	---			123.716	73.8858	23.8998	1.08104	1.67443	0.0684193	0.138365
10348194	NM_028889	Efhd1	EF hand domain containing 1	138.979	83.0936	14.5754	1.58608	1.67256	0.0204189	0.0853659
10343720	---			1457.17	871.351	54.9113	31.2819	1.67231	0.000624421	0.035837
10339437	---			147.388	88.1607	36.0459	18.4006	1.67181	0.0958095	0.15854
10342623	---			1660.27	993.381	148.915	9.61019	1.67133	0.0157512	0.0789125
10340367	---			100.523	60.1507	33.0288	22.6647	1.67118	0.20615	0.222464
10436209	NM_001033238	Cblb	Casitas B-lineage lymphoma b	1704.78	1020.27	226.176	88.3158	1.67091	0.0220223	0.088128
10338955	---			326.549	195.484	63.2971	19.6098	1.67047	0.0569744	0.128104
10524568	BC057022	BC057022	cDNA sequence BC057022	584.463	349.895	104.132	15.9161	1.6704	0.0555312	0.126713
10497731	NM_026222	Ccdc39	coiled-coil domain containing 39	220.368	131.944	13.7078	20.9915	1.67016	0.054821	0.126204
10358527	NM_001024720	Hmcn1	hemicentin 1	132.092	79.193	26.1631	7.37348	1.66798	0.0612187	0.132143
10338160	---			237.829	142.624	116.707	65.9774	1.66752	0.329427	0.283824
10549361	NM_026281	Tm7sf3	transmembrane 7 superfamily member 3	1252.88	751.413	99.8551	62.084	1.66736	0.00628813	0.0565682
10404026	NM_175661	Hist1h2af	histone cluster 1	1179.65	707.903	518.872	46.9332	1.66641	0.255124	0.246664
10469571	NM_027715	Otud1	OTU domain containing 1	288.534	173.164	56.1625	25.7448	1.66625	0.0560061	0.127157
10503695	NM_001109661	Bach2	BTB and CNC homology 2	648.911	389.47	144.939	30.1527	1.66614	0.0825148	0.149172
10606083	NM_007709	Cited1	Cbp	338.232	203.076	27.8318	7.96328	1.66554	0.00836004	0.0618343
10372807	NM_177092	Msrb3	methionine sulfoxide reductase B3	511.166	306.989	64.8673	11.3201	1.6651	0.0277362	0.0961438
10425317	---			221.413	133.095	68.0157	0.492626	1.66357	0.153441	0.195039
10338898	---			225.991	135.886	102.289	2.4021	1.66309	0.266539	0.252557
10570963	NM_177086	Zmat4	zinc finger	1326.66	797.781	81.8006	0.682959	1.66293	0.00787498	0.0606715
10565152	NM_011983	Homer2	homer homolog 2 (Drosophila)	974.443	586.538	268.682	10.4347	1.66135	0.129241	0.180718
10394829	---			493.773	297.217	70.5534	54.8104	1.66132	0.0453246	0.116498
10591412	NM_010333	S1pr2	sphingosine-1-phosphate receptor 2	374.841	225.667	5.91211	16.6465	1.66104	0.0354704	0.10654
10431140	NM_001163145	1810041L15Rik	RIKEN cDNA 1810041L15 gene	1616.79	973.86	228.386	0.288922	1.66019	0.0395806	0.110368
10376245	NM_001113325	Gria1	glutamate receptor	770.716	464.335	137.781	23.5908	1.65983	0.0559797	0.127128
10341788	---			227.737	137.246	33.5794	13.5332	1.65933	0.0291244	0.0978875
10570018	NM_033622	Tnfsf13b	tumor necrosis factor (ligand) superfamily	254.927	153.654	56.553	11.2563	1.6591	0.0829605	0.149263
10378754	NM_027773	Fam57a	family with sequence similarity 57	1770.34	1067.33	258.381	6.68376	1.65867	0.0420737	0.112644
10338442	---			144.229	86.9615	31.3493	24.6943	1.65854	0.115992	0.172033
10441740	NM_026644	Agpat4	1-acylglycerol-3-phosphate O-acyltransferase 4 (lysophosphatidic acid acyltransferase	1962.44	1183.49	150.058	125.147	1.65818	0.0118917	0.0712715
10364548	---			263.585	158.972	90.8298	11.0389	1.65806	0.181838	0.210481
10504206	BC057092	N28178	expressed sequence N28178	7288.47	4396.97	235.543	168.335	1.65761	0.000678998	0.0347862
10548118	NM_201371	Prmt8	protein arginine N-methyltransferase 8	1373.94	828.874	150.675	84.8931	1.65759	0.0141565	0.0763204
10605616	NM_001160403	Il1rapl1	interleukin 1 receptor accessory protein-like 1	186.565	112.562	27.1721	5.74604	1.65743	0.03548	0.106534
10534596	NM_009986	Cux1	cut-like homeobox 1	592.475	357.716	27.9949	43.0605	1.65627	0.0371039	0.108186
10456021	NM_177407	Camk2a	calcium	5908.05	3567.24	223.148	250.369	1.6562	0.00789798	0.0607455
10534679	NM_201373	Trim56	tripartite motif-containing 56	794.25	479.604	43.9869	13.8997	1.65606	0.00295968	0.0458775
10353803	NM_198899	Uggt1	UDP-glucose glycoprotein glucosyltransferase 1	2261.88	1366.16	70.3219	23.8013	1.65565	0.000620578	0.0360731
10529410	NM_026660	Mfsd10	major facilitator superfamily domain containing 10	1135.06	685.604	50.7189	82.6316	1.65556	0.0400675	0.110907
10567702	NM_144529	Arhgap17	Rho GTPase activating protein 17	1538.32	929.226	267.743	93.5863	1.65548	0.0449749	0.116059
10355069	NM_001114609	Ino80d	INO80 complex subunit D	844.831	510.708	111.129	71.7879	1.65424	0.0271313	0.095396
10340639	---			1753.56	1060.13	98.4175	21.0454	1.6541	0.00444072	0.0504617
10340434	---			282.937	171.07	121.611	36.4094	1.65393	0.249453	0.243807
10574057	NR_029552	Mir138-2	microRNA 138-2	346.806	209.695	142.236	16.3364	1.65386	0.235398	0.236861
10482030	NM_013515	Stom	stomatin	1410.62	852.969	383.907	11.8485	1.65378	0.128073	0.179946
10342894	---			244.919	148.273	20.8105	30.5718	1.65181	0.0817048	0.148626
10493519	NM_001113331	Shc1	src homology 2 domain-containing transforming protein C1	2314.5	1401.35	327.781	69.3434	1.65162	0.0338353	0.104218
10454198	NM_026301	Rnf125	ring finger protein 125	2701.23	1635.97	44.876	4.96979	1.65115	0.000482197	0.0358407
10341694	---			259.734	157.473	85.8996	48.7825	1.64939	0.189097	0.213514
10358593	NM_001024720	Hmcn1	hemicentin 1	103.793	62.9347	20.9829	0.670331	1.64922	0.0775693	0.145843
10468762	NM_001114312	4930506M07Rik	RIKEN cDNA 4930506M07 gene	547.865	332.199	88.9663	1.34525	1.64921	0.0522672	0.12333
10604505	NR_015505	6720401G13Rik	RIKEN cDNA 6720401G13 gene	450.986	273.613	41.4166	3.07825	1.64826	0.0170473	0.080639
10543785	AB041803	AB041803	cDNA sequence AB041803	559.564	339.62	8.15219	47.7076	1.64762	0.0916038	0.155497
10461071	NM_175381	2700081O15Rik	RIKEN cDNA 2700081O15 gene	513.255	311.551	55.741	24.4885	1.64742	0.0134132	0.0744831
10448247	NM_009555	Zfp40	zinc finger protein 40	1106.13	671.646	12.2247	28.2171	1.6469	0.015319	0.0782607
10412562	NM_134080	Flnb	filamin	451.276	274.302	44.5285	60.6543	1.64518	0.0873746	0.152309
10562399	NM_146188	Kctd15	potassium channel tetramerisation domain containing 15	361.191	219.744	49.4501	29.4114	1.64369	0.027967	0.0962082
10338325	---			114.122	69.4538	29.9989	10.3701	1.64314	0.110861	0.168418
10433953	NM_023249	Ypel1	yippee-like 1 (Drosophila)	360.913	219.672	32.8915	9.36434	1.64296	0.0112239	0.0699507
10394437	NM_021429	Hs1bp3	HCLS1 binding protein 3	595.816	362.793	53.3997	13.765	1.6423	0.0115483	0.0708523
10338963	---			269.774	164.48	44.6194	22.0302	1.64016	0.0407575	0.111288
10389047	NM_001034013	Accn1	amiloride-sensitive cation channel 1	2162.89	1318.74	73.2469	30.583	1.64012	0.000579328	0.0352574
10505120	NM_172868	Palm2	paralemmin 2	3363.74	2051.13	350.727	55.6178	1.63995	0.0199085	0.0851156
10440513	NM_144853	Cyyr1	cysteine and tyrosine-rich protein 1	106.273	64.8356	22.4006	5.60075	1.63912	0.0751463	0.143731
10338482	---			565.295	345.08	41.152	57.1884	1.63816	0.0570244	0.128089
10598794	---			264.025	161.178	20.3944	67.4473	1.63809	0.261503	0.249796
10483698	NM_153138	Wipf1	WAS	1127.48	688.402	228.71	54.0615	1.63782	0.0705351	0.140081
10449356	NM_001002895	AI413582	expressed sequence AI413582	1574.33	961.496	149.575	106.768	1.63737	0.0143294	0.0766603
10344061	---			198.821	121.478	10.8357	21.213	1.63668	0.0829527	0.149279
10550039	NM_153802	Zfp128	zinc finger protein 128	235.529	144.016	37.5603	11.6351	1.63544	0.0398587	0.110532
10581061	NM_153582	Cmtm4	CKLF-like MARVEL transmembrane domain containing 4	707.384	432.595	68.1737	23.4321	1.63521	0.0114876	0.0707192
10340989	---			181.937	111.265	14.8996	8.40021	1.63516	0.00662284	0.0572507
10579347	NM_023065	Ifi30	interferon gamma inducible protein 30	503.127	307.703	50.1898	52.917	1.63511	0.0468789	0.118083
10595803	NM_011279	Rnf7	ring finger protein 7	1803.58	1103.19	122.582	203.638	1.63488	0.0795747	0.147202
10439009	NM_007470	Apod	apolipoprotein D	1453.32	889.88	236.083	99.3843	1.63316	0.0389626	0.110066
10338029	---			1111.29	680.517	546.105	224.456	1.63301	0.315529	0.277115
10417034	NM_008929	Dnajc3	DnaJ (Hsp40) homolog	1398.4	856.5	25.1963	60.4014	1.63269	0.0312097	0.101111
10338475	---			2710.08	1660.39	1100.21	153.766	1.63219	0.238154	0.238049
10338094	---			337.812	206.971	56.5379	13.3899	1.63217	0.0482455	0.119013
10404578	NM_009881	Cdyl	chromodomain protein	166.917	102.272	20.2724	20.922	1.63209	0.0655803	0.136021
10544487	NM_013861	Tpk1	thiamine pyrophosphokinase	380.544	233.36	48.8474	50.0007	1.63072	0.0717343	0.140859
10458323	NM_001167891	Nrg2	neuregulin 2	531.842	326.193	42.1094	21.044	1.63045	0.00580009	0.0551313
10418169	ENSMUST00000079800	1700054O19Rik	RIKEN cDNA 1700054O19 gene	233.334	143.111	17.2765	12.8694	1.63044	0.00832268	0.0617594
10344348	---			253.372	155.409	42.5696	12.0791	1.63035	0.0464194	0.117611
10344024	---			128.363	78.7544	60.454	24.5226	1.62991	0.299348	0.269321
10339370	---			127.075	77.9825	29.7127	15.5814	1.62954	0.095854	0.158556
10392642	NM_147219	Abca5	ATP-binding cassette	3113.51	1910.94	308.632	37.9468	1.62931	0.0193935	0.0845889
10587241	NM_173731	Hmgcll1	3-hydroxymethyl-3-methylglutaryl-Coenzyme A lyase-like 1	729.738	448.184	55.2598	83.3609	1.62821	0.0755351	0.144019
10592266	NM_001145960	Slc37a2	solute carrier family 37 (glycerol-3-phosphate transporter)	107.457	65.9994	12.1681	1.00806	1.62816	0.0265205	0.0946431
10503116	AK052165	LOC100036540	hypothetical LOC100036540	113.255	69.5759	8.76733	7.79909	1.62779	0.0162332	0.0795259
10455542	NM_009681	Ap3s1	adaptor-related protein complex 3	820.629	504.177	231.319	51.3768	1.62766	0.133756	0.183272
10383681	NM_019574	Patz1	POZ (BTB) and AT hook containing zinc finger 1	172.215	105.842	16.5552	2.01946	1.6271	0.0183334	0.0824229
10344531	---			129.81	79.7895	38.941	19.1673	1.62691	0.154657	0.195651
10370946	NM_172457	Mobkl2a	MOB1	1431.22	879.743	117.399	96.905	1.62686	0.0147743	0.077486
10525516	BC138176	Wdr66	WD repeat domain 66	134.12	82.4969	27.3264	21.115	1.62576	0.105458	0.164538
10378763	NM_177367	Gemin4	gem (nuclear organelle) associated protein 4	218.38	134.326	29.7874	13.1683	1.62575	0.0256139	0.09343
10388747	ENSMUST00000073705	BC017647	cDNA sequence BC017647	307.516	189.211	97.8165	11.5246	1.62525	0.168813	0.203293
10355050	NM_001045513	Raph1	Ras association (RalGDS	2691.75	1656.54	301.409	99.0776	1.62492	0.0174659	0.081221
10408225	NM_178208	Hist1h4c	histone cluster 1	244.164	150.33	119.685	10.9712	1.62419	0.306887	0.272909
10352920	NM_001011874	Xkr4	X Kell blood group precursor related family member 4	452.072	278.566	14.8062	4.84992	1.62285	0.000811145	0.0326909
10457834	NM_199024	Nol4	nucleolar protein 4	316.367	195.064	40.1343	25.9867	1.62186	0.0268523	0.0950047
10434668	NM_133706	Tmem97	transmembrane protein 97	1227.71	757.764	81.5061	59.6266	1.62017	0.0060552	0.0556882
10504234	NM_001081413	Unc13b	unc-13 homolog B (C. elegans)	562.37	347.193	76.7476	39.955	1.61976	0.0267873	0.0948485
10510708	NM_133788	Icmt	isoprenylcysteine carboxyl methyltransferase	883.37	545.59	88.1454	25.948	1.61911	0.0143586	0.0767259
10400844	NM_133198	Pygl	liver glycogen phosphorylase	617.864	381.747	80.4041	8.82614	1.61852	0.0345664	0.105325
10338047	---			567.122	350.71	137.532	38.5525	1.61707	0.101321	0.161756
10501179	NM_016738	Rpl13	ribosomal protein L13	113.86	70.4871	33.8168	25.4349	1.61534	0.207177	0.223122
10441422	NM_146073	Zdhhc14	zinc finger	1878.44	1164.68	160.882	15.917	1.61283	0.0154437	0.0783681
10535807	NM_010228	Flt1	FMS-like tyrosine kinase 1	113.079	70.1243	32.3065	7.72566	1.61255	0.139764	0.186379
10376868	NM_011706	Trpv2	transient receptor potential cation channel	3276.85	2034.36	147.954	203.937	1.61075	0.0264302	0.0945813
10365891	NM_172051	Tmcc3	transmembrane and coiled coil domains 3	597.475	371.167	48.7275	25.0457	1.60972	0.00671235	0.0575308
10408092	NM_175657	Hist1h4m	histone cluster 1	2018.55	1254.22	794.308	32.9981	1.6094	0.237281	0.237727
10476814	NM_016889	Insm1	insulinoma-associated 1	448.979	279.037	80.1694	16.4773	1.60903	0.0595281	0.130671
10488608	NM_175093	Trib3	tribbles homolog 3 (Drosophila)	205.252	127.609	36.6046	3.26525	1.60845	0.0651243	0.135789
10478778	NM_001085495	Arfgef2	ADP-ribosylation factor guanine nucleotide-exchange factor 2 (brefeldin A-inhibited)	3990.28	2481.64	361.379	99.1279	1.60792	0.0122905	0.0720894
10489891	NM_019835	B4galt5	UDP-Gal:betaGlcNAc beta 1	2755.07	1713.71	117.193	79.3841	1.60767	0.00145222	0.0370949
10411464	NM_172591	Fcho2	FCH domain only 2	941.203	585.554	88.7746	38.2486	1.60737	0.010289	0.0675114
10456363	NM_010307	Gnal	guanine nucleotide binding protein	5089.8	3166.56	300.748	57.8382	1.60736	0.00589186	0.0551366
10521832	NM_028744	Pi4k2b	phosphatidylinositol 4-kinase type 2 beta	157.815	98.1877	39.697	15.824	1.60728	0.1092	0.167353
10408902	NM_001081059	Ccdc90a	coiled-coil domain containing 90A	639.273	397.844	89.7393	31.006	1.60684	0.0305876	0.100169
10444780	NM_010380	H2-D1	histocompatibility 2	4127.5	2570.27	121.014	71.7648	1.60586	0.000373353	0.0356375
10592251	NM_001029838	Pknox2	Pbx	2348.6	1462.69	138.41	54.7665	1.60567	0.00308811	0.045982
10343567	---			574.352	357.72	169.702	89.0243	1.60559	0.160502	0.198911
10418903	NM_183209	Gprin2	G protein regulated inducer of neurite outgrowth 2	408.992	254.747	31.8536	34.8979	1.60548	0.0341188	0.10463
10339018	---			197.785	123.232	18.2915	6.12473	1.60498	0.0113738	0.0703049
10568735	NM_001113415	Ebf3	early B-cell factor 3	2758.04	1718.48	208.676	47.6467	1.60493	0.00923306	0.0647528
10344356	---			268.717	167.463	28.3128	10.3908	1.60463	0.0148913	0.077606
10441456	NM_011523	Synj2	synaptojanin 2	625.383	389.738	84.746	30.087	1.60463	0.0280103	0.0962475
10561868	NM_146186	Wdr62	WD repeat domain 62	207.597	129.381	9.90364	13.6955	1.60455	0.0296049	0.0987702
10408118	NM_178186	Hist1h2ag	histone cluster 1	1747.15	1090.18	581.447	20.5579	1.60262	0.189267	0.2136
10559702	NM_026741	Zfp579	zinc finger protein 579	332.992	207.875	10.5588	1.72756	1.60189	0.00170744	0.0390987
10339052	---			1448.12	904.056	167.165	79.0732	1.6018	0.0176482	0.081525
10339679	---			122.881	76.7149	43.5112	19.272	1.60179	0.209186	0.224219
10472408	NM_153409	Csrnp3	cysteine-serine-rich nuclear protein 3	2374.54	1483.14	159.49	66.5478	1.60102	0.00426117	0.0497301
10514791	NM_153565	Pcsk9	proprotein convertase subtilisin	291.202	181.912	21.0122	23.4334	1.60079	0.0313674	0.101188
10595205	NM_026120	2410127L17Rik	RIKEN cDNA 2410127L17 gene	410.211	256.275	60.0374	19.7613	1.60067	0.0347935	0.105556
10371356	NM_145220	Appl2	adaptor protein	814.261	508.75	28.2774	17.07	1.60051	0.000643458	0.0357968
10386211	NM_029283	Fam183b	family with sequence similarity 183	118.142	73.8418	24.1872	3.16726	1.59994	0.0831717	0.149376
10340236	---			116.121	72.5871	26.5274	24.6367	1.59974	0.178819	0.208934
10341326	---			161.555	101.018	101.951	18.103	1.59926	0.413028	0.320498
10417601	NM_008972	Ptma	prothymosin alpha	2990.25	1870.73	217.089	39.9174	1.59844	0.00960939	0.0656654
10600886	NM_029536	Gpr165	G protein-coupled receptor 165	541.379	338.794	97.3013	40.4353	1.59796	0.053873	0.125294
10512791	NM_198664	Tbc1d2	TBC1 domain family	118.657	74.2707	8.53573	1.42906	1.59763	0.00982183	0.0664659
10343542	---			289.709	181.381	160.585	27.4907	1.59724	0.363187	0.298367
10542310	NM_009875	Cdkn1b	cyclin-dependent kinase inhibitor 1B	2020.14	1265.02	83.8576	12.0066	1.59692	0.00327982	0.0466898
10484207	NM_001025576	Ccdc141	coiled-coil domain containing 141	1040.26	651.607	85.9031	50.3762	1.59645	0.00785428	0.0607183
10341770	---			154.477	96.8326	25.2562	12.0029	1.5953	0.0438099	0.11452
10343358	---			126.47	79.2977	25.4543	16.4981	1.59487	0.0877005	0.152555
10586759	NM_016787	Bnip2	BCL2	1005.82	630.719	51.9885	55.43	1.59472	0.013774	0.0755155
10542875	BC106181	3010003L21Rik	RIKEN cDNA 3010003L21 gene	154.994	97.2771	20.7239	8.53972	1.59332	0.0267209	0.0947614
10368888	NM_019740	Foxo3	forkhead box O3	1075.97	675.539	81.4538	24.7416	1.59275	0.00774012	0.0604543
10389269	NM_019816	Aatf	apoptosis antagonizing transcription factor	518.001	325.269	41.4184	37.3159	1.59253	0.0198595	0.0851873
10531627	NR_030692	A930011G23Rik	RIKEN cDNA A930011G23 gene	330.232	207.366	30.1325	27.0168	1.59251	0.0265623	0.0946803
10341737	---			167.707	105.35	63.9286	6.27684	1.5919	0.231996	0.235475
10602704	NM_173780	Klf8	Kruppel-like factor 8	626.265	393.486	14.7917	79.3523	1.59158	0.143671	0.188896
10554240	NM_020583	Isg20	interferon-stimulated protein	350.19	220.037	53.8194	26.8343	1.5915	0.0384642	0.109477
10349872	---			351.593	220.941	68.5118	25.8116	1.59134	0.066008	0.136346
10559436	NM_029934	Mboat7	membrane bound O-acyltransferase domain containing 7	976.216	613.738	223.672	73.1616	1.59061	0.0940916	0.157073
10338124	---			221.297	139.173	80.6282	24.6348	1.59008	0.214802	0.227205
10341455	---			217.05	136.611	50.4299	44.2538	1.58882	0.173152	0.205597
10457733	NM_019737	B4galt6	UDP-Gal:betaGlcNAc beta 1	4003.01	2521.17	347.704	121.875	1.58776	0.00985939	0.0666207
10522051	NM_008453	Klf3	Kruppel-like factor 3 (basic)	444.148	279.816	89.588	7.27901	1.58728	0.0850085	0.150529
10342777	---			157.051	98.9671	52.4551	11.5024	1.5869	0.189614	0.213778
10379184	NM_026740	Slc46a1	solute carrier family 46	700.54	441.777	81.4744	29.3377	1.58573	0.0201797	0.0853896
10554013	NM_001081163	Chsy1	chondroitin sulfate synthase 1	1325.94	836.181	232.325	82.0869	1.58571	0.0532905	0.124674
10412345	NM_001081009	Parp8	poly (ADP-ribose) polymerase family	1889.49	1192.27	167.673	113.745	1.58478	0.0123845	0.0723131
10345442	NM_015818	Hs6st1	heparan sulfate 6-O-sulfotransferase 1	1737.45	1096.69	121.77	5.99627	1.58427	0.0115998	0.0708808
10507539	NM_019422	Elovl1	elongation of very long chain fatty acids (FEN1	1955.01	1234.18	118.219	172.45	1.58406	0.0526651	0.12385
10455687	NM_001081224	Prr16	proline rich 16	502.417	317.201	52.8259	19.7752	1.58391	0.0154924	0.0784393
10526614	NM_031404	Actl6b	actin-like 6B	1463.54	924.767	167.787	81.3614	1.5826	0.0183349	0.0823889
10553336	NM_028031	Zdhhc13	zinc finger	2228.04	1409.16	232.714	1.88903	1.58111	0.0258704	0.0938745
10473160	NM_080558	Ssfa2	sperm specific antigen 2	887.049	561.116	78.0921	6.82435	1.58087	0.0176943	0.0816547
10342898	---			150.301	95.0928	20.297	13.0211	1.58057	0.0347813	0.10559
10338373	---			290.147	183.605	40.5713	4.59477	1.58027	0.0428072	0.113502
10344400	---			383.136	242.507	85.0928	45.7513	1.5799	0.0970504	0.159084
10386219	NM_011758	Zfp39	zinc finger protein 39	252.996	160.195	42.5296	26.1642	1.5793	0.0570998	0.128195
10338004	---			583.885	369.731	299.475	84.3724	1.57922	0.343412	0.290166
10338530	---			1506.5	954.224	135.714	56.5443	1.57877	0.0100062	0.0669641
10523595	NM_011204	Ptpn13	protein tyrosine phosphatase	606.03	383.921	63.5544	14.3539	1.57853	0.0203463	0.0853772
10557742	NM_172748	Fbxl19	F-box and leucine-rich repeat protein 19	440.022	278.81	66.1172	53.3095	1.57822	0.0660004	0.136393
10582862	NM_027144	Arhgef12	Rho guanine nucleotide exchange factor (GEF) 12	196.342	124.412	61.9036	11.208	1.57815	0.177153	0.207978
10340996	---			140.644	89.1351	12.8986	32.5657	1.57788	0.243384	0.240729
10366517	NM_021452	Kcnmb4	potassium large conductance calcium-activated channel	130.274	82.5783	18.9203	17.2042	1.57758	0.0783014	0.146399
10484503	NM_001033346	Lrrc55	leucine rich repeat containing 55	314.343	199.354	27.8227	26.254	1.5768	0.0299792	0.0993609
10549497	NM_019643	Fam60a	family with sequence similarity 60	512.348	325.13	45.519	68.2733	1.57583	0.102543	0.16245
10524659	NM_026398	Pop5	processing of precursor 5	1328.83	843.576	268.559	31.2219	1.57523	0.0859291	0.15139
10528143	NM_008889	Ppp1r14b	protein phosphatase 1	1133.21	719.395	73.3983	19.0961	1.57523	0.00634566	0.0565806
10339311	---			108.728	69.0236	7.77939	1.52499	1.57523	0.00953106	0.0654259
10390816	NM_010666	Krt27	keratin 27	133.87	84.9976	16.1008	17.1609	1.57499	0.077835	0.1461
10359908	NM_009062	Rgs4	regulator of G-protein signaling 4	7878.01	5003.49	316.515	74.6637	1.57451	0.00229862	0.042194
10449971	NM_028543	Zfp763	zinc finger protein 763	310.303	197.115	40.6182	30.4208	1.57422	0.0421487	0.112678
10339878	---			339.258	215.567	42.5954	20.8073	1.57379	0.023939	0.0909039
10555892	NM_008971	Twf1	twinfilin	1622.96	1031.33	225.079	116.496	1.57365	0.0315807	0.101371
10509941	NM_001081174	6330545A04Rik	RIKEN cDNA 6330545A04 gene	209.288	133.016	24.6877	10.5645	1.57341	0.0203926	0.0854133
10405757	NM_028079	2010111I01Rik	RIKEN cDNA 2010111I01 gene	565.851	359.664	9.49807	13.7715	1.57327	0.00657549	0.0570044
10544133	NM_172893	Parp12	poly (ADP-ribose) polymerase family	829.554	527.394	84.6104	12.5946	1.57293	0.0222675	0.0884459
10549700	NM_146177	Suv420h2	suppressor of variegation 4-20 homolog 2 (Drosophila)	391.786	249.156	29.503	39.1831	1.57245	0.0597522	0.130846
10358581	NM_001024720	Hmcn1	hemicentin 1	213.4	135.738	24.4231	3.11701	1.57214	0.0289741	0.0978174
10584095	NM_172766	Nfrkb	nuclear factor related to kappa B binding protein	558.916	355.611	23.0803	42.787	1.5717	0.0557814	0.126964
10481857	NM_016768	Pbx3	pre B-cell leukemia transcription factor 3	1198.14	762.357	177.072	11.8889	1.57163	0.0499983	0.121291
10426835	NM_001159361	Dip2b	DIP2 disco-interacting protein 2 homolog B (Drosophila)	859.268	546.999	87.7991	39.9611	1.57088	0.013953	0.0761288
10552245	NM_172298	Tshz3	teashirt zinc finger family member 3	1992.24	1268.38	125.656	85.7331	1.5707	0.00508175	0.0519519
10441436	NM_025664	Snx9	sorting nexin 9	852.816	543.054	77.5348	4.03084	1.57041	0.0199052	0.0851817
10535213	NM_172277	Snx8	sorting nexin 8	383.026	244.033	39.4597	24.7502	1.56956	0.0170909	0.080593
10545897	NM_028099	Dusp11	dual specificity phosphatase 11 (RNA	955.069	608.521	49.4059	59.6915	1.56949	0.0231976	0.0897421
10339557	---			1747.9	1114.15	273.454	37.8605	1.56882	0.0532512	0.124647
10411373	NM_010422	Hexb	hexosaminidase B	2446.17	1559.27	219.933	0.59117	1.56879	0.0198875	0.0851863
10355152	NM_022721	Fzd5	frizzled homolog 5 (Drosophila)	162.051	103.338	18.8267	6.65153	1.56817	0.0212801	0.087158
10343098	---			891.197	568.438	8.14335	153.167	1.5678	0.205534	0.222144
10372324	NM_009306	Syt1	synaptotagmin I	6987.89	4457.67	204.969	167.217	1.56761	0.00116061	0.0351987
10460285	NM_025529	Nudt8	nudix (nucleoside diphosphate linked moiety X)-type motif 8	395.453	252.321	31.969	10.7834	1.56726	0.00896282	0.0641475
10343785	---			106.805	68.1517	26.5335	3.66713	1.56717	0.124001	0.177329
10344322	---			179.979	114.86	44.7447	21.2382	1.56694	0.120061	0.174585
10563725	ENSMUST00000060569	Mrgpra2a	MAS-related GPR	144.788	92.4037	12.8408	25.0326	1.56691	0.166994	0.202339
10402415	NM_199314	Serpina11	serine (or cysteine) peptidase inhibitor	176.466	112.626	36.7001	27.3033	1.56684	0.118086	0.173634
10444008	NR_034153	Zfp414	zinc finger protein 414	1112.11	709.835	29.2634	57.5549	1.56671	0.0351661	0.106154
10432473	NM_001001884	Nckap5l	NCK-associated protein 5-like	907.183	579.043	146.093	23.5634	1.56669	0.0554124	0.126665
10388880	NM_133706	Tmem97	transmembrane protein 97	484.168	309.059	63.9891	61.7308	1.56659	0.0755054	0.143992
10461022	NM_008889	Ppp1r14b	protein phosphatase 1	413.213	263.771	30.4203	38.2995	1.56656	0.0502687	0.121492
10523778	ENSMUST00000055994	D830014E11Rik	RIKEN cDNA D830014E11 gene	108.318	69.1444	15.9808	10.7643	1.56655	0.0481484	0.119129
10478928	NM_080455	Tshz2	teashirt zinc finger family member 2	3091.6	1973.84	339.996	38.8245	1.56629	0.0275528	0.0958743
10445640	NM_001097623	Trerf1	transcriptional regulating factor 1	375.905	240.026	57.818	5.87214	1.5661	0.0533942	0.124756
10390407	NM_001081220	Gpr179	G protein-coupled receptor 179	186.187	118.916	16.7594	19.9358	1.5657	0.0615105	0.132394
10415911	NM_001081177	Kif13b	kinesin family member 13B	585.425	374.094	69.3955	43.4675	1.56491	0.02517	0.0926304
10478774	NM_001085495	Arfgef2	ADP-ribosylation factor guanine nucleotide-exchange factor 2 (brefeldin A-inhibited)	2645.31	1690.91	243.696	8.05009	1.56443	0.0209049	0.0862054
10606579	X15962	Rps12	ribosomal protein S12	713.404	456.071	181.459	42.78	1.56424	0.124948	0.177842
10450075	NM_001001892	H2-K1	histocompatibility 2	1003.45	641.552	24.9416	51.1963	1.56409	0.0362776	0.107435
10457820	NM_001161483	Nol4	nucleolar protein 4	299.106	191.265	20.7623	16.8445	1.56383	0.010874	0.0692938
10572747	NM_001001491	Tpm4	tropomyosin 4	2406.6	1538.95	70.0067	120.385	1.5638	0.0284813	0.0971299
10361191	NM_181546	Syt14	synaptotagmin XIV	755.169	483.151	59.2114	43.2314	1.56301	0.0111323	0.0700055
10400805	NM_008697	Nin	ninein	352.614	225.602	34.2836	8.98719	1.56299	0.0166146	0.0795465
10340031	---			158.676	101.528	27.647	19.4694	1.56287	0.0762222	0.144659
10583847	NM_178415	Bbs9	Bardet-Biedl syndrome 9 (human)	1365.14	873.673	103.339	44.0171	1.56253	0.00651848	0.0570006
10379344	ENSMUST00000100735	Gm10387	predicted gene 10387	104.968	67.194	1.84095	7.31369	1.56216	0.076077	0.144565
10524555	NM_023556	Mvk	mevalonate kinase	1454.67	931.576	151.882	99.0338	1.56151	0.0192213	0.0842836
10517677	NM_008675	Nbl1	neuroblastoma	2839.87	1818.76	55.0826	93.8186	1.56143	0.0153863	0.0783397
10493009	NM_001003912	Arhgef11	Rho guanine nucleotide exchange factor (GEF) 11	3670.23	2351.7	243.205	77.8312	1.56067	0.0058208	0.0551547
10455852	NM_028447	Prrc1	proline-rich coiled-coil 1	773.593	495.905	98.2153	31.8837	1.55996	0.0278819	0.0962439
10386723	NM_011841	Mapk7	mitogen-activated protein kinase 7	626.212	401.509	44.3761	26.2719	1.55965	0.005758	0.0550196
10543306	NM_173007	Tspan12	tetraspanin 12	784.516	503.091	62.4644	40.3684	1.55939	0.00908506	0.064362
10446592	ENSMUST00000003366	Dlgap1	discs	957.558	614.373	131.318	59.6303	1.55859	0.031105	0.10088
10535938	NM_133898	N4bp2l1	NEDD4 binding protein 2-like 1	227.825	146.221	25.645	9.50405	1.55809	0.0198323	0.0851913
10436945	NM_017391	Slc5a3	solute carrier family 5 (inositol transporters)	1044.47	670.408	145.335	8.84819	1.55796	0.0461142	0.117495
10425686	NM_172428	Ccdc134	coiled-coil domain containing 134	516.379	331.502	43.1879	30.9092	1.5577	0.0128232	0.0731788
10484237	NM_178723	Zfp385b	zinc finger protein 385B	1101.62	707.28	41.026	70.3289	1.55754	0.0407521	0.111307
10436392	NM_007757	Cpox	coproporphyrinogen oxidase	626.37	402.476	93.0495	24.981	1.55629	0.0428699	0.113502
10572514	ENSMUST00000050921	A230052G05Rik	RIKEN cDNA A230052G05 gene	114.383	73.5047	17.3525	7.99195	1.55613	0.0403236	0.111006
10501456	NM_001163567	Fam102b	family with sequence similarity 102	2541.09	1633.19	281.724	170.677	1.55591	0.0207978	0.0861949
10349378	NM_199021	Dpp10	dipeptidylpeptidase 10	202.065	129.876	44.9711	11.482	1.55583	0.0986531	0.160005
10339861	---			155.012	99.6718	26.3584	34.9518	1.55522	0.212682	0.226149
10429327	NM_153178	Eif2c2	eukaryotic translation initiation factor 2C	1032.08	664.951	150.643	48.4511	1.55211	0.0393642	0.110376
10555174	NM_001113379	Lrrc32	leucine rich repeat containing 32	116.117	74.816	28.8006	11.9092	1.55203	0.120168	0.174657
10353265	NM_011291	Rpl7	ribosomal protein L7	1071.46	690.469	79.6067	356.787	1.55178	0.366094	0.299697
10607250	NM_029943	Apex2	apurinic	289.002	186.261	28.3198	13.3961	1.5516	0.0131919	0.0737965
10608693	---			155.069	99.963	80.3193	11.7208	1.55126	0.356518	0.295782
10571342	NM_011295	Rps12	ribosomal protein S12	318.932	205.604	115.855	19.488	1.5512	0.229348	0.234494
10598848	NM_199317	Phf16	PHD finger protein 16	330.05	212.79	33.0714	36.3614	1.55106	0.0628485	0.133719
10340226	---			144.355	93.0766	20.6378	39.8553	1.55092	0.289156	0.264108
10340408	---			265.431	171.147	18.7943	13.4223	1.55089	0.00831176	0.0617289
10340185	---			109.738	70.7703	22.3167	6.8645	1.55062	0.0815215	0.14862
10546661	NM_053202	Foxp1	forkhead box P1	483.722	312.076	31.5852	13.2024	1.55001	0.00459308	0.0508548
10542317	NM_009875	Cdkn1b	cyclin-dependent kinase inhibitor 1B	265.449	171.257	58.6312	7.47658	1.55	0.105245	0.164404
10602180	NM_177592	Tmem164	transmembrane protein 164	1501.58	968.792	178.872	24.0464	1.54995	0.0327301	0.102627
10436442	NM_019643	Fam60a	family with sequence similarity 60	357.996	231.002	38.9497	6.62958	1.54975	0.0259654	0.0938437
10343367	---			138.804	89.5829	19.7674	34.9476	1.54945	0.258732	0.248352
10538753	BC010820	Atoh1	atonal homolog 1 (Drosophila)	878.783	567.35	20.1404	14.6376	1.54893	0.000375761	0.0354937
10511498	NM_175175	Plekhf2	pleckstrin homology domain containing	213.938	138.144	17.617	2.58551	1.54865	0.0152408	0.0783023
10563734	NM_153524	Mrgpra4	MAS-related GPR	124.082	80.1297	9.65062	13.4844	1.54851	0.074817	0.143434
10492815	NM_177260	Tmem154	transmembrane protein 154	120.468	77.8135	8.8267	14.4525	1.54816	0.0977503	0.159453
10339248	---			115.121	74.3601	36.7826	5.96594	1.54816	0.191289	0.214679
10553324	NM_026436	Tmem86a	transmembrane protein 86A	517.63	334.467	25.5755	68.8908	1.54763	0.140808	0.187002
10361771	NM_009538	Plagl1	pleiomorphic adenoma gene-like 1	1615.76	1044.06	232.662	2.56604	1.54758	0.0509942	0.122267
10376216	NM_153139	Slc36a1	solute carrier family 36 (proton	6456.81	4172.39	369.019	72.2725	1.54751	0.00625914	0.0564755
10413086	NM_134079	Adk	adenosine kinase	3292.06	2127.59	106.523	154.97	1.54732	0.0204805	0.0854659
10512594	NM_001099314	Msmp	microseminoprotein	163.764	105.865	31.0096	7.71545	1.54692	0.0738356	0.142577
10480288	BC119802	Nebl	nebulette	127.513	82.452	3.02554	0.297776	1.54652	0.00131056	0.0366794
10541494	NM_024277	Rps27a	ribosomal protein S27A	1447.82	936.883	362.612	98.9066	1.54536	0.124847	0.177837
10343866	---			3593.45	2325.73	984.994	107.358	1.54509	0.153397	0.19501
10455647	NM_134131	Tnfaip8	tumor necrosis factor	186.844	120.971	38.6069	9.90862	1.54454	0.087684	0.152585
10415714	NM_028113	Fam123a	family with sequence similarity 123	1218.3	788.997	171.71	15.473	1.54411	0.0478788	0.119015
10436196	ENSMUST00000084838	Cd47	CD47 antigen (Rh-related antigen	3616.38	2342.21	641.247	326.055	1.54401	0.0624063	0.133404
10453436	NM_176808	Mcfd2	multiple coagulation factor deficiency 2	777.541	503.665	29.0297	28.9364	1.54377	0.00579157	0.0551659
10478048	NM_008489	Lbp	lipopolysaccharide binding protein	111.999	72.5609	5.56289	9.0732	1.54352	0.0558391	0.126936
10431802	NM_008971	Twf1	twinfilin	2693.34	1745.47	198.335	49.8829	1.54305	0.00952922	0.0655125
10408574	---			826.843	535.913	179.378	87.5126	1.54287	0.0967996	0.158874
10398881	NM_001100460	Zbtb42	zinc finger and BTB domain containing 42	386.441	250.482	21.2764	1.25955	1.54279	0.00781301	0.0606579
10388648	NM_172945	Ankrd13b	ankyrin repeat domain 13b	1242.87	805.644	57.7774	39.5095	1.5427	0.00235907	0.0424445
10440099	NM_018784	St3gal6	ST3 beta-galactoside alpha-2	1351.82	876.533	158.419	6.98935	1.54224	0.0347634	0.105571
10402020	NM_001081191	Eml5	echinoderm microtubule associated protein like 5	314.849	204.243	47.1706	34.6096	1.54154	0.06096	0.131772
10437698	NM_029582	Txndc11	thioredoxin domain containing 11	523.059	339.378	86.3344	23.7875	1.54123	0.0553113	0.126721
10574962	NM_010901	Nfatc3	nuclear factor of activated T-cells	1130.2	733.377	105.608	50.5107	1.54108	0.0119936	0.0714105
10577388	NM_001039553	4930467E23Rik	RIKEN cDNA 4930467E23 gene	187.93	121.957	40.3184	9.86564	1.54095	0.0956551	0.1584
10402512	NR_028576	Scarna13	small Cajal body-specific RNA 1	3142.42	2039.46	649.388	375.688	1.54081	0.0958441	0.158569
10339291	---			102.679	66.6803	6.28422	10.2205	1.53987	0.0756093	0.144069
10506603	NM_023672	Ssbp3	single-stranded DNA binding protein 3	3546.66	2303.42	197.802	55.7777	1.53974	0.00457451	0.0508977
10482249	NM_010264	Nr6a1	nuclear receptor subfamily 6	450.184	292.456	60.2653	0.107879	1.53932	0.0453754	0.116529
10343202	---			259.397	168.543	76.4257	29.2523	1.53905	0.168775	0.203274
10466680	NM_010638	Klf9	Kruppel-like factor 9	266.109	172.914	83.4172	7.42448	1.53897	0.191355	0.214674
10514779	NM_178143	Prkaa2	protein kinase	2383.13	1549.2	310.627	119.547	1.5383	0.0297173	0.0989631
10339759	---			679.744	442.079	124.128	96.5122	1.53761	0.103576	0.163344
10571752	NR_027759	Dctd	dCMP deaminase	439.791	286.087	74.3787	5.15425	1.53726	0.0689553	0.138706
10510447	NM_001159344	Casz1	castor homolog 1	353.184	229.765	29.8668	25.5712	1.53716	0.0225067	0.0887353
10343608	---			184.645	120.148	4.10571	12.8579	1.53681	0.0727949	0.141714
10472372	NM_001099298	Scn2a1	sodium channel	1890.86	1230.77	351.192	95.1167	1.53632	0.0717202	0.140892
10503876	NM_177774	Srsf13b	serine	634.664	413.247	73.47	42.4545	1.5358	0.023711	0.0906838
10596912	NM_030075	Klhdc8b	kelch domain containing 8B	223.847	145.759	27.9228	3.37537	1.53574	0.0376108	0.108443
10499861	NM_009114	S100a9	S100 calcium binding protein A9 (calgranulin B)	124.282	80.9392	32.8527	8.57989	1.5355	0.140823	0.186966
10429329	NM_153178	Eif2c2	eukaryotic translation initiation factor 2C	1983.93	1292.24	156.878	56.0422	1.53527	0.00892602	0.0640864
10442240	NM_001008501	Zfp760	zinc finger protein 760	461.406	300.554	44.8304	67.2345	1.53518	0.124931	0.177873
10358575	NM_001024720	Hmcn1	hemicentin 1	134.299	87.5018	16.3101	4.11178	1.53481	0.0299119	0.0993194
10339661	---			131.427	85.6328	11.2655	15.0854	1.53478	0.0809965	0.148409
10361358	NM_001161822	Rgs17	regulator of G-protein signaling 17	1128.82	735.828	104.69	122.871	1.53409	0.0669483	0.137195
10345091	NM_172124	B3gat2	beta-1	374.415	244.161	63.0719	9.99122	1.53347	0.0652795	0.135894
10471201	NM_001112703	Abl1	c-abl oncogene 1	720.439	469.841	76.046	43.5923	1.53337	0.0185268	0.0825151
10438702	NM_145933	St6gal1	beta galactoside alpha 2	128.056	83.5873	17.4405	1.19206	1.532	0.046755	0.117934
10338042	---			1296.78	846.537	540.02	139.284	1.53187	0.284049	0.261313
10489429	NM_145369	Wfdc5	WAP four-disulfide core domain 5	128.292	83.78	9.31948	21.0076	1.53129	0.172529	0.205314
10517287	NM_207237	Man1c1	mannosidase	1760.81	1150.07	280.225	47.4601	1.53104	0.0583113	0.129505
10483679	NM_001190297	Gpr155	G protein-coupled receptor 155	2321.16	1516.1	99.3071	5.55266	1.531	0.00487226	0.0516745
10433963	NM_026940	Ydjc	YdjC homolog (bacterial)	298.251	194.961	40.2744	44.5386	1.5298	0.114012	0.170717
10596880	NM_007567	Bsn	bassoon	1000.08	653.818	123.25	33.0143	1.5296	0.030598	0.100167
10366457	NM_011217	Ptprr	protein tyrosine phosphatase	1455.74	951.721	78.8521	3.50405	1.52959	0.00791693	0.0607366
10370818	NM_198615	Mex3d	mex3 homolog D (C. elegans)	777.247	508.222	80.5508	28.1546	1.52935	0.0180953	0.0820439
10462039	NM_001035244	Trpm3	transient receptor potential cation channel	930.244	608.294	40.7642	63.8828	1.52927	0.0428442	0.113567
10599562	NM_001081123	Arhgap36	Rho GTPase activating protein 36	967.076	632.417	27.8573	12.8828	1.52917	0.000455094	0.0361999
10597413	NM_019922	Crtap	cartilage associated protein	404.154	264.305	60.7189	57.4055	1.52912	0.101119	0.161691
10358533	NM_001024720	Hmcn1	hemicentin 1	257.91	168.733	70.2424	28.7789	1.52851	0.151268	0.193497
10579925	NM_021356	Gab1	growth factor receptor bound protein 2-associated protein 1	1885.62	1233.76	48.7971	72.2406	1.52835	0.0157384	0.0789792
10595033	NM_009130	Scg3	secretogranin III	7186.29	4702.42	594.134	240.32	1.52821	0.00945636	0.0654083
10487154	NM_177608	Secisbp2l	SECIS binding protein 2-like	1337.41	875.778	49.0388	94.8278	1.52711	0.0560948	0.127262
10564539	NM_001024703	Mctp2	multiple C2 domains	797.169	522.098	122.074	22.2085	1.52686	0.0539814	0.125449
10358579	NM_001024720	Hmcn1	hemicentin 1	183.568	120.228	15.2337	4.60253	1.52684	0.0116312	0.0707862
10462140	NM_028785	Dock8	dedicator of cytokinesis 8	307.606	201.562	43.4492	0.410311	1.52611	0.0516437	0.122689
10338224	---			129.433	84.8379	52.3805	18.509	1.52565	0.280351	0.259569
10377490	NM_009659	Alox12b	arachidonate 12-lipoxygenase	107.391	70.3903	11.4697	4.39845	1.52565	0.0188953	0.083338
10394498	NM_172470	Wdr35	WD repeat domain 35	841.246	551.532	96.0774	65.4609	1.52529	0.0292266	0.0979403
10505028	ENSMUST00000107651	Slc44a1	solute carrier family 44	2221	1456.45	360.087	48.9671	1.52495	0.0630399	0.133781
10455135	NM_053146	Pcdhb21	protocadherin beta 21	280.009	183.633	71.4794	23.7609	1.52483	0.133923	0.183252
10420413	NM_015771	Lats2	large tumor suppressor 2	1185.8	777.863	128.426	29.3205	1.52443	0.0249248	0.0924411
10342095	---			173.759	113.984	34.8033	38.6737	1.52441	0.215982	0.227974
10577240	NM_053171	Csmd1	CUB and Sushi multiple domains 1	1365.87	896.249	63.4488	73.0114	1.52399	0.0175395	0.0813964
10565709	NM_001081167	B3gnt6	UDP-GlcNAc:betaGal beta-1	109.708	71.9879	21.8067	12.5875	1.52398	0.0919714	0.155625
10471486	NM_001146350	Eng	endoglin	129.212	84.8081	29.3026	3.39348	1.52358	0.116953	0.172641
10581645	NM_212447	Marveld3	MARVEL (membrane-associating) domain containing 3	117.227	76.9479	16.927	1.37972	1.52346	0.052835	0.124057
10515702	NM_198170	Szt2	seizure threshold 2	301.897	198.173	50.1961	23.6869	1.5234	0.0555543	0.126734
10341895	---			202.48	132.937	26.6223	9.18616	1.52313	0.0327948	0.102723
10396671	NM_153804	Plekhg3	pleckstrin homology domain containing	312.428	205.136	25.5231	4.12957	1.52303	0.0155499	0.0785115
10358633	NM_001024720	Hmcn1	hemicentin 1	138.607	91.0222	24.3195	5.50145	1.52278	0.0684899	0.138384
10606858	NM_001168578	Tceal8	transcription elongation factor A (SII)-like 8	1054.35	692.416	106.714	77.4428	1.52271	0.0243155	0.0915289
10457040	NM_183033	Zfp516	zinc finger protein 516	617.566	405.628	79.1094	13.7032	1.5225	0.0385937	0.109536
10342417	---			196.073	128.814	42.6978	8.30748	1.52214	0.105421	0.164537
10339389	---			437.288	287.362	91.4601	51.5332	1.52173	0.101557	0.16182
10342760	---			256.08	168.29	23.1206	0.168785	1.52167	0.0223401	0.088579
10442331	NM_023058	Pkmyt1	protein kinase	508.487	334.181	24.1385	26.3631	1.52159	0.0150997	0.0778421
10511099	NM_177186	Slc35e2	solute carrier family 35	1293.93	850.543	63.1664	36.2998	1.5213	0.00216495	0.0410706
10467420	NM_016861	Pdlim1	PDZ and LIM domain 1 (elfin)	1173.1	771.456	127.01	23.5152	1.52064	0.0270241	0.0952038
10343037	---			193.044	126.989	37.6136	1.48689	1.52016	0.0928725	0.156217
10604175	NM_172930	Fam70a	family with sequence similarity 70	7351.7	4837.67	496.049	146.799	1.51968	0.00734672	0.0590604
10342780	---			103.492	68.1017	18.1044	1.57392	1.51967	0.0756676	0.144089
10583519	NM_010493	Icam1	intercellular adhesion molecule 1	183.891	121.022	25.9461	21.3512	1.51949	0.0695684	0.139198
10390258	NM_028965	Snx11	sorting nexin 11	842.25	554.42	126.019	56.0128	1.51916	0.0433338	0.113998
10564235	NR_029772	Mir344	microRNA 344	215.02	141.557	39.319	36.2519	1.51896	0.141913	0.187754
10544640	ENSMUST00000101417	Tra2a	transformer 2 alpha homolog (Drosophila)	444.499	292.637	30.7396	23.2587	1.51895	0.0100745	0.0671237
10408085	NM_178184	Hist1h2an	histone cluster 1	1066.07	701.965	225.093	48.1663	1.51869	0.0994007	0.160243
10352725	NM_025864	Tmem206	transmembrane protein 206	1046.94	689.416	70.069	89.3156	1.51859	0.0487343	0.119503
10413726	NM_009393	Tnnc1	troponin C	191.79	126.35	30.4226	3.80172	1.51792	0.0620254	0.132966
10342633	---			111.147	73.2605	20.3124	4.19397	1.51714	0.0763627	0.144744
10423570	---			168.182	110.857	15.7583	24.5663	1.5171	0.13196	0.182354
10606301	NM_001190409	Magt1	magnesium transporter 1	892.88	588.726	97.7355	66.8922	1.51663	0.0271595	0.0951631
10461439	NM_146094	Fads1	fatty acid desaturase 1	4024.2	2653.63	204.314	69.2896	1.51649	0.00321318	0.0461761
10404061	NM_175664	Hist1h2bb	histone cluster 1	125.168	82.5724	66.8921	5.28793	1.51586	0.38501	0.308471
10360563	NM_027188	Smyd3	SET and MYND domain containing 3	724.22	478.007	48.754	16.3897	1.51508	0.00665001	0.0573215
10474700	NM_011580	Thbs1	thrombospondin 1	191.346	126.299	46.098	13.0011	1.51502	0.1242	0.177389
10358631	NM_001024720	Hmcn1	hemicentin 1	189.207	124.912	25.0209	6.37586	1.51472	0.0378444	0.108702
10574096	NM_009681	Ap3s1	adaptor-related protein complex 3	2783.47	1837.76	354.712	183.418	1.5146	0.0304341	0.0999189
10577395	NR_028428	2610005L07Rik	cadherin 11 pseudogene	705.038	465.606	59.6844	69.9506	1.51424	0.0592011	0.130427
10450242	NM_009780	C4b	complement component 4B (Childo blood group)	255.101	168.469	37.8743	58.262	1.51424	0.236786	0.237467
10482868	NM_028118	Wdsub1	WD repeat	679.386	448.778	42.7335	35.8234	1.51386	0.0109759	0.0696013
10507500	NM_008135	Slc6a9	solute carrier family 6 (neurotransmitter transporter	355.896	235.097	55.6216	44.2124	1.51383	0.0825867	0.149123
10358531	NM_001024720	Hmcn1	hemicentin 1	173.417	114.557	25.1833	8.09823	1.51381	0.0432509	0.113912
10459089	NM_008306	Ndst1	N-deacetylase	1964.54	1298.15	149.127	158.575	1.51334	0.0365134	0.107711
10342534	---			255.288	168.776	12.4453	6.69185	1.51259	0.00213259	0.040971
10344050	---			597.167	394.848	82.1098	13.6846	1.5124	0.0459654	0.117247
10381211	NM_013792	Naglu	alpha-N-acetylglucosaminidase (Sanfilippo disease IIIB)	337.262	223.157	26.4077	43.4317	1.51132	0.115244	0.171542
10592891	NM_153537	Phldb1	pleckstrin homology-like domain	283.04	187.421	18.2311	3.86807	1.51018	0.00860348	0.0624631
10574404	NM_001035123	Setd6	SET domain containing 6	474.126	314.138	49.7241	8.32599	1.50929	0.0267955	0.0948408
10338757	---			681.176	451.334	198.797	149.05	1.50925	0.24269	0.240331
10411359	NM_019755	Plp2	proteolipid protein 2	195.998	129.866	65.872	6.69332	1.50924	0.222826	0.231135
10382189	NM_013475	Apoh	apolipoprotein H	120.682	79.9729	10.1284	0.171608	1.50904	0.0199792	0.085057
10511739	NM_027769	Cpne3	copine III	5347.66	3545.79	270.613	123.949	1.50817	0.00246686	0.0432678
10594110	NM_008684	Neo1	neogenin	1209.42	802.05	93.9624	25.9553	1.50792	0.0112027	0.0699627
10342462	---			149.118	98.9274	4.52668	25.098	1.50734	0.210039	0.224709
10515649	NM_198170	Szt2	seizure threshold 2	407.186	270.139	48.6594	28.6148	1.50732	0.0287995	0.097591
10370376	NM_008826	Pfkl	phosphofructokinase	1407.21	933.596	89.4552	40.9306	1.5073	0.00469444	0.0510421
10499536	NM_010107	Efna1	ephrin A1	1537.58	1020.83	90.939	30.7449	1.5062	0.00491434	0.0515778
10375402	NM_009616	Adam19	a disintegrin and metallopeptidase domain 19 (meltrin beta)	1891.69	1256.46	92.3553	158.471	1.50557	0.0658283	0.136223
10585610	NM_019651	Ptpn9	protein tyrosine phosphatase	1987.03	1320.08	53.8355	246.262	1.50523	0.153168	0.194992
10409236	---			532.422	353.831	41.0167	20.5839	1.50474	0.00801144	0.060895
10448232	NR_030709	Gm16386	predicted gene 16386	454.264	301.914	64.4465	11.6348	1.50461	0.0491652	0.12017
10341969	---			116.344	77.3515	24.29	4.25906	1.5041	0.102928	0.162746
10520950	NM_016861	Pdlim1	PDZ and LIM domain 1 (elfin)	1303.69	866.855	55.8913	2.83288	1.50393	0.00527211	0.0528844
10520388	NM_028234	Rbm33	RNA binding motif protein 33	123.912	82.4029	24.0759	7.70523	1.50374	0.0832107	0.149417
10430400	NM_130859	Card10	caspase recruitment domain family	365.039	242.835	12.9855	4.26541	1.50324	0.00141183	0.0376542
10578477	NM_153535	Fam149a	family with sequence similarity 149	962.783	640.721	59.9774	92.2846	1.50266	0.073139	0.142109
10530558	NM_153567	Slain2	SLAIN motif family	580.614	386.524	181.615	115.473	1.50214	0.241058	0.239553
10377537	NM_146019	Chd3	chromodomain helicase DNA binding protein 3	289.597	192.795	70.3299	30.1376	1.5021	0.130852	0.18185
10340711	---			221.273	147.357	35.2777	32.2179	1.50161	0.113336	0.170295
10572663	NM_025396	Pgls	6-phosphogluconolactonase	563.544	375.337	73.0327	52.5725	1.50143	0.0473295	0.118526
10338706	---			658.179	438.816	208.316	31.0579	1.4999	0.20683	0.22288
10592493	NM_001081121	4931429I11Rik	RIKEN cDNA 4931429I11 gene	1191.27	794.323	137.603	13.6678	1.49973	0.0361357	0.10733
10472923	NM_001177602	Ak4	adenylate kinase 4	439.202	292.865	112.251	1.53083	1.49968	0.152463	0.194532
10472350	NM_145523	Gca	grancalcin	1219.22	813.925	256.887	82.055	1.49795	0.0994437	0.160284
10339438	---			138.606	92.5756	14.0515	10.609	1.49721	0.0288582	0.0976077
10340516	---			210.734	140.757	18.3642	11.3666	1.49715	0.0135425	0.0750172
10546659	---			385.093	257.246	12.4723	11.6419	1.49698	0.00352129	0.0470265
10512949	NM_013454	Abca1	ATP-binding cassette	2319.61	1549.52	239.953	151.172	1.49698	0.0220749	0.0882219
10604230	NM_009681	Ap3s1	adaptor-related protein complex 3	2282.23	1524.56	114.257	57.3166	1.49698	0.002421	0.043301
10377889	NM_001045959	Mink1	misshapen-like kinase 1 (zebrafish)	3305.53	2208.43	134.107	153.409	1.49678	0.014086	0.0761669
10568392	NM_026418	Rgs10	regulator of G-protein signalling 10	7755.81	5183.14	505.018	277.525	1.49635	0.00530376	0.0530845
10410644	NM_001081680	Zfp72	zinc finger protein 72	385.71	257.786	67.0843	48.1637	1.49624	0.0932644	0.156557
10473919	NM_001165989	Ckap5	cytoskeleton associated protein 5	3971.47	2654.38	180.402	19.889	1.4962	0.00550911	0.0539488
10368144	NM_009397	Tnfaip3	tumor necrosis factor	288.562	192.922	107.328	2.85728	1.49574	0.262627	0.250342
10513884	NM_011599	Tle1	transducin-like enhancer of split 1	963.51	644.188	37.931	35.5597	1.4957	0.00572303	0.054975
10380599	NM_172799	Ttll6	tubulin tyrosine ligase-like family	124.089	83.0195	18.8152	6.46355	1.49469	0.0495752	0.120652
10468229	ENSMUST00000026008	Trim8	tripartite motif-containing 8	124.802	83.4983	34.3968	3.69593	1.49467	0.171067	0.204729
10433996	NM_023348	Snap29	synaptosomal-associated protein 29	1361.89	911.5	171.856	39.4087	1.49412	0.0375356	0.108364
10465244	NR_002847	Malat1	metastasis associated lung adenocarcinoma transcript 1 (non-coding RNA)	3470.51	2323.1	836.257	54.7287	1.49391	0.139779	0.186345
10490826	NM_177660	Zbtb10	zinc finger and BTB domain containing 10	664.689	445.165	194.197	20.2398	1.49313	0.187606	0.213265
10342601	---			273.184	182.984	53.4698	10.655	1.49294	0.0927562	0.156138
10399357	NM_013527	Gdf7	growth differentiation factor 7	237.604	159.175	42.6033	27.9453	1.49272	0.0901385	0.154484
10492424	---			553.974	371.227	79.2792	72.8497	1.49228	0.0955246	0.158329
10419416	BC023359	3632451O06Rik	RIKEN cDNA 3632451O06 gene	3857.75	2585.16	93.4231	36.7568	1.49227	0.000400739	0.036339
10476299	---			219.889	147.381	86.5661	19.3316	1.49198	0.28201	0.260573
10369615	NM_011157	Srgn	serglycin	443.192	297.121	61.5471	46.2355	1.49162	0.0616873	0.132617
10401891	NM_175367	Ston2	stonin 2	395.074	264.996	16.7202	1.89335	1.49087	0.00480398	0.0513104
10535900	---			236.377	158.568	104.793	7.18966	1.49069	0.326994	0.282695
10525893	NM_030210	Aacs	acetoacetyl-CoA synthetase	2351.91	1577.92	233.437	70.3572	1.49051	0.0198969	0.0851865
10338908	---			359.276	241.089	29.4458	72.6354	1.49022	0.235393	0.236882
10432362	NM_026967	Rhebl1	Ras homolog enriched in brain like 1	327.755	219.962	18.7383	30.4965	1.49005	0.0752704	0.143786
10556135	---			130.53	87.6239	6.6243	9.0475	1.48966	0.039688	0.11043
10358529	NM_001024720	Hmcn1	hemicentin 1	155.019	104.076	17.1666	19.3206	1.48948	0.0918827	0.155562
10496182	NM_001004367	Cxxc4	CXXC finger 4	375.44	252.159	59.5555	14.8298	1.4889	0.0599662	0.131093
10582580	---			746.089	501.214	339.127	83.711	1.48857	0.33827	0.287832
10347933	NM_001013817	Sp140	Sp140 nuclear body protein	306.203	205.778	95.3446	10.3413	1.48803	0.207984	0.223459
10419744	NM_011405	Slc7a7	solute carrier family 7 (cationic amino acid transporter	3341.65	2245.82	578.465	157.832	1.48794	0.0704885	0.14005
10341102	---			246.604	165.743	88.2939	72.4794	1.48787	0.354146	0.294731
10582310	NM_138656	Mvd	mevalonate (diphospho) decarboxylase	1035.96	696.278	47.1636	71.0189	1.48785	0.0442384	0.11501
10536369	NM_052993	C1galt1	core 1 synthase	770.661	518.314	107.129	56.969	1.48686	0.0422432	0.112831
10494208	NM_199475	Fam63a	family with sequence similarity 63	944.749	635.425	16.5301	27.8956	1.4868	0.0147207	0.0772944
10454514	NM_144862	Lims2	LIM and senescent cell antigen like domains 2	305.153	205.332	15.0595	5.76721	1.48615	0.00290526	0.0455795
10342773	---			117.105	78.7988	3.12308	4.87834	1.48613	0.0216111	0.0875252
10424119	NM_010930	Nov	nephroblastoma overexpressed gene	627.429	422.219	72.324	48.2213	1.48603	0.0329855	0.103036
10494227	NM_029789	Lass2	LAG1 homolog	2964.47	1995.63	245.683	110.36	1.48548	0.0105995	0.0686057
10484197	NM_001025576	Ccdc141	coiled-coil domain containing 141	3565.17	2400.09	304.179	166.556	1.48543	0.0118452	0.0712754
10391918	NM_183034	Plekhm1	pleckstrin homology domain containing	461.969	311.075	43.2662	24.5581	1.48507	0.0157452	0.0789699
10338557	---			116.385	78.4101	9.7318	6.55117	1.48432	0.0145019	0.0769475
10604832	NR_030499	Mir505	microRNA 505	106.525	71.7809	7.66537	2.71643	1.48402	0.00837155	0.0618186
10449644	NM_025374	Glo1	glyoxalase 1	1391.75	937.855	16.6549	84.6794	1.48397	0.0769545	0.145259
10340744	---			1036.3	698.344	402.164	9.45029	1.48394	0.282737	0.260873
10584891	NM_007503	Fxyd2	FXYD domain-containing ion transport regulator 2	6679.22	4501.24	414.037	121.26	1.48386	0.00677624	0.0576967
10353002	---			589.651	397.619	110.533	126.181	1.48295	0.220852	0.230194
10523647	NM_001080798	Aff1	AF4	803.344	541.816	117.316	41.5636	1.48269	0.0469549	0.118209
10547322	NM_001159533	Cacna1c	calcium channel	1989.13	1341.7	154.141	97.1208	1.48255	0.0106062	0.0685512
10445119	NM_013819	H2-M3	histocompatibility 2	214.796	144.891	8.65977	6.60273	1.48246	0.00275342	0.0446656
10587683	NM_009742	Bcl2a1a	B-cell leukemia	118.154	79.7293	34.1643	19.1569	1.48194	0.206728	0.222823
10595159	NM_026480	Ooep	oocyte expressed protein homolog (dog)	367.215	247.864	34.7283	18.2804	1.48152	0.0156288	0.0786471
10342107	---			106.948	72.1915	21.0543	6.5254	1.48145	0.0911875	0.155138
10599696	NM_172779	Ddx26b	DEAD	851.495	574.794	88.7614	74.9118	1.48139	0.0419087	0.112501
10343631	---			272.814	184.198	74.4514	26.8109	1.48109	0.167639	0.202795
10550501	NM_153761	Mill2	MHC I like leukocyte 2	100.511	67.8966	12.0199	5.06587	1.48036	0.0284114	0.097074
10502522	NM_011828	Hs2st1	heparan sulfate 2-O-sulfotransferase 1	1109.75	749.868	102.613	50.9594	1.47993	0.0145189	0.0769928
10515613	NM_011213	Ptprf	protein tyrosine phosphatase	3125.35	2112.37	124.801	97.7027	1.47955	0.00298583	0.0459686
10557644	NM_010183	Fbrs	fibrosin	525.107	355.054	108.518	24.4267	1.47895	0.10477	0.164199
10531544	NM_198422	Paqr3	progestin and adipoQ receptor family member III	1225.32	828.585	151.068	69.6685	1.47881	0.0307528	0.100348
10581378	NM_013640	Psmb10	proteasome (prosome	1398.03	945.486	321.888	3.60352	1.47864	0.135228	0.183846
10560644	NM_008990	Pvrl2	poliovirus receptor-related 2	511.14	345.738	32.5298	38.8862	1.4784	0.0406499	0.111296
10582337	NM_001037298	Fam38a	family with sequence similarity 38	111.395	75.3577	12.6224	9.13035	1.47822	0.0372282	0.108166
10479740	---			160.034	108.282	42.9502	16.9466	1.47794	0.16536	0.2013
10434229	NM_013805	Cldn5	claudin 5	154.952	104.902	34.9475	12.7326	1.47711	0.119502	0.174416
10581188	NM_028888	4931428F04Rik	RIKEN cDNA 4931428F04 gene	796.057	538.941	73.158	25.059	1.47708	0.0161443	0.0794768
10512487	NR_001460	Rmrp	RNA component of mitochondrial RNAase P	2790.18	1889.42	981.232	62.6162	1.47674	0.252333	0.245221
10432190	NM_007405	Adcy6	adenylate cyclase 6	305.768	207.084	15.6913	19.6195	1.47654	0.0317862	0.101635
10369920	NM_198860	AI646023	expressed sequence AI646023	1893.91	1282.97	127.404	59.0661	1.47619	0.00615547	0.0558737
10594044	NM_012043	Islr	immunoglobulin superfamily containing leucine-rich repeat	162.624	110.178	27.8433	3.80763	1.47602	0.0787425	0.146589
10415678	NM_026908	Cab39l	calcium binding protein 39-like	2925.9	1983.74	110.917	130.319	1.47494	0.0145435	0.0769878
10534912	NM_175521	6430598A04Rik	RIKEN cDNA 6430598A04 gene	431.041	292.275	51.4912	46.9394	1.47478	0.068672	0.138443
10563722	NM_153067	Mrgpra3	MAS-related GPR	3014.21	2043.99	409.121	183.025	1.47467	0.039563	0.110421
10519224	NM_001033490	Pusl1	pseudouridylate synthase-like 1	1096.88	743.865	102.702	32.5559	1.47457	0.0177853	0.0817006
10505073	NM_172867	Zfp462	zinc finger protein 462	1223.31	829.871	113.388	3.89027	1.47409	0.026411	0.0946247
10588874	NM_007567	Bsn	bassoon	321.926	218.398	47.7855	45.3408	1.47403	0.114157	0.170736
10354220	NM_172499	Mfsd9	major facilitator superfamily domain containing 9	552.191	374.653	43.8117	9.09227	1.47387	0.0153084	0.0783829
10542857	NM_178797	Far2	fatty acyl CoA reductase 2	1853.61	1257.71	89.8915	84.7651	1.4738	0.0102434	0.0676036
10530310	NM_001164806	Bend4	BEN domain containing 4	582.552	395.412	42.5259	32.5727	1.47328	0.0140988	0.0761453
10393761	NM_027980	2310003H01Rik	RIKEN cDNA 2310003H01 gene	381.73	259.175	25.775	1.41122	1.47286	0.0141112	0.0761215
10574656	NM_015821	Fbxl8	F-box and leucine-rich repeat protein 8	201.575	136.861	19.2283	21.358	1.47285	0.0710353	0.140276
10373143	NM_033072	Mbd6	methyl-CpG binding domain protein 6	450.558	306.069	84.4968	42.2627	1.47208	0.087134	0.152153
10385893	NM_019687	Slc22a4	solute carrier family 22 (organic cation transporter)	297.536	202.13	14.1621	29.6109	1.47201	0.101116	0.161713
10338361	---			301.055	204.524	140.388	33.9772	1.47198	0.357187	0.295986
10437399	NM_030205	Coro7	coronin 7	1899.17	1290.57	85.8579	109.1	1.47158	0.0270534	0.0952701
10484205	NM_001025576	Ccdc141	coiled-coil domain containing 141	833.573	566.461	199.202	38.1624	1.47154	0.139891	0.186384
10340685	---			139.548	94.8332	42.5769	16.6669	1.47152	0.208146	0.223528
10343112	---			688.927	468.271	194.368	2.73545	1.47121	0.188132	0.213354
10557754	NM_198424	Orai3	ORAI calcium release-activated calcium modulator 3	985.041	669.566	98.3562	21.7888	1.47116	0.0246939	0.0921878
10342625	---			139.342	94.7388	12.6849	2.79365	1.4708	0.0202938	0.0854733
10343502	---			123.659	84.0816	19.241	21.6331	1.4707	0.168359	0.203043
10605256	NM_010227	Flna	filamin	568.011	386.299	120.723	51.4646	1.47039	0.10953	0.167349
10505858	NM_197889	Ifnz	interferon zeta	101.302	68.9018	32.8333	22.3771	1.47024	0.28304	0.260887
10491058	NR_004439	Rprl2	ribonuclease P RNA-like 2	653.21	444.338	336.062	26.5415	1.47008	0.394337	0.313012
10358559	NM_001024720	Hmcn1	hemicentin 1	102.698	69.8606	9.36301	5.33161	1.47005	0.0155468	0.0785393
10338861	---			175.198	119.203	24.6618	19.4638	1.46974	0.0741559	0.142922
10533323	NM_172126	Adam1a	a disintegrin and metallopeptidase domain 1a	159.125	108.267	27.562	4.39076	1.46974	0.0806014	0.147954
10523772	NM_178701	Lrrc8d	leucine rich repeat containing 8D	1291.17	878.578	142.712	36.1099	1.46962	0.0293776	0.0982286
10364375	NM_007793	Cstb	cystatin B	1923.47	1309.11	388.644	48.0323	1.46929	0.108429	0.166678
10577508	NM_001004140	Ckap2	cytoskeleton associated protein 2	120.173	81.8172	21.5262	11.2538	1.4688	0.0811107	0.148498
10585338	NM_212445	Kdelc2	KDEL (Lys-Asp-Glu-Leu) containing 2	401.691	273.498	47.1234	60.1581	1.46872	0.137622	0.185212
10406736	NM_010170	F2rl2	coagulation factor II (thrombin) receptor-like 2	5479.18	3732.09	124.657	254.581	1.46813	0.0375153	0.108375
10580990	NM_001039154	Cdh8	cadherin 8	538.044	366.579	32.5697	12.5456	1.46775	0.00532159	0.0531456
10591988	NM_001024139	Adamts15	a disintegrin-like and metallopeptidase (reprolysin type) with thrombospondin type 1 motif	337.402	229.965	57.1692	30.3971	1.46719	0.0725358	0.141483
10374769	---			383.447	261.41	65.6237	11.1547	1.46684	0.078863	0.146723
10559919	BC023179	Zfp772	zinc finger protein 772	309.332	210.89	65.6863	24.5402	1.4668	0.109384	0.167324
10444291	NM_207105	H2-Ab1	histocompatibility 2	105.554	71.9853	20.1264	14.2207	1.46633	0.120478	0.17494
10500847	NM_133853	Magi3	membrane associated guanylate kinase	4142.75	2825.61	102.54	1.15998	1.46614	0.00201074	0.0399854
10371842	NM_029166	Uhrf1bp1l	UHRF1 (ICBP90) binding protein 1-like	215.221	146.802	36.9049	16.1883	1.46606	0.0704311	0.14009
10339384	---			238.613	162.759	31.9298	39.3258	1.46605	0.15821	0.197583
10438572	NM_001001881	2510009E07Rik	RIKEN cDNA 2510009E07 gene	1438.98	982.068	184.41	116.022	1.46526	0.042926	0.113617
10389087	NM_001164570	Rffl	ring finger and FYVE like domain containing protein	547.737	373.86	41.7114	14.3091	1.46509	0.0105789	0.0685698
10562657	NM_001008427	Gm5595	predicted gene 5595	157.975	107.858	49.4129	17.7326	1.46465	0.21792	0.228688
10601701	NM_026239	Tmem35	transmembrane protein 35	1801.85	1230.23	139.983	31.7223	1.46465	0.0144332	0.076943
10525473	NM_001039723	Tmem120b	transmembrane protein 120B	1152.89	787.475	46.6208	19.8512	1.46403	0.00165308	0.0387341
10482509	NM_001141981	Rbm43	RNA binding motif protein 43	882.855	603.097	36.2769	58.2218	1.46387	0.0473295	0.118559
10451395	NM_029091	Klc4	kinesin light chain 4	327.856	223.97	27.7713	24.8805	1.46384	0.0322645	0.102263
10343171	---			199.807	136.511	9.10309	11.7247	1.46367	0.0292742	0.0980637
10593123	NM_011526	Tagln	transgelin	106.017	72.448	22.5396	9.6993	1.46336	0.112062	0.169334
10338393	---			118.002	80.6415	16.8919	25.9829	1.46329	0.246512	0.242212
10514658	NM_001025615	Ccdc50	coiled-coil domain containing 50	478.008	326.747	25.6751	12.4859	1.46293	0.00341237	0.0466717
10448202	NM_001001491	Tpm4	tropomyosin 4	4933.84	3374.81	349.358	268.25	1.46196	0.0136866	0.0753554
10501555	NM_007446	Amy1	amylase 1	141.189	96.6208	23.5035	14.5093	1.46127	0.0793519	0.14706
10464425	NM_018869	Grk5	G protein-coupled receptor kinase 5	731.878	500.936	135.192	23.536	1.46102	0.0920288	0.155577
10407535	NM_011287	Rpl10a	ribosomal protein L10A	139.462	95.4658	43.5983	0.630118	1.46086	0.22257	0.230975
10400357	NM_013815	Baz1a	bromodomain adjacent to zinc finger domain 1A	124.971	85.5608	18.2082	20.0857	1.46061	0.150381	0.192907
10563740	NM_207540	Mrgprx1	MAS-related GPR	1344.64	920.794	192.187	151.216	1.4603	0.0785481	0.146468
10368947	NM_172393	Aim1	absent in melanoma 1	103.603	70.9503	40.8874	18.8913	1.46022	0.317847	0.278155
10531581	NM_029947	Prdm8	PR domain containing 8	108.241	74.1314	19.4593	5.63689	1.46012	0.0816131	0.148698
10341136	---			128.969	88.3342	40.4315	0.218077	1.46001	0.223851	0.231748
10516566	NM_001033189	C77080	expressed sequence C77080	1313.16	899.656	147.729	0.120007	1.45962	0.0400098	0.110815
10340661	---			1134.29	777.457	155.966	62.3679	1.45898	0.0433038	0.113952
10505270	NM_025286	Slc31a2	solute carrier family 31	1973.32	1352.59	610.716	96.856	1.45892	0.21743	0.228465
10339967	---			387.383	265.584	80.5186	44.3863	1.45861	0.118459	0.173957
10409968	NM_011296	Rps18	ribosomal protein S18	579.987	397.703	50.8506	9.49906	1.45834	0.0207279	0.0859838
10518686	NM_001164049	Pik3cd	phosphatidylinositol 3-kinase catalytic delta polypeptide	743.965	510.152	34.0471	29.9699	1.45832	0.007201	0.0588276
10606581	X15962	Rps12	ribosomal protein S12	1148.73	787.728	220.195	121.954	1.45828	0.100435	0.161109
10364494	NM_031380	Fstl3	follistatin-like 3	421.818	289.277	11.729	6.94146	1.45818	0.000547941	0.0360053
10338587	---			125.157	85.8381	11.5061	9.98356	1.45806	0.0363851	0.107613
10341043	---			228.301	156.662	38.454	50.915	1.45728	0.247724	0.242876
10516994	NM_145553	Fam76a	family with sequence similarity 76	516.479	354.687	73.6935	3.89584	1.45616	0.0621397	0.133085
10341515	---			113.409	77.8837	26.0676	4.07303	1.45614	0.13781	0.185328
10515710	NM_198170	Szt2	seizure threshold 2	437.166	300.236	34.2573	13.9057	1.45608	0.0106216	0.0684555
10344306	---			158.456	108.828	17.9206	40.0561	1.45602	0.306006	0.272499
10472549	NM_028284	Bbs5	Bardet-Biedl syndrome 5 (human)	337.491	231.824	52.8812	29.7365	1.45581	0.0651351	0.135781
10348670	NM_181405	Rnpepl1	arginyl aminopeptidase (aminopeptidase B)-like 1	281.308	193.247	14.1098	24.3116	1.45569	0.0761555	0.144654
10574087	NM_022331	Herpud1	homocysteine-inducible	2473.03	1699.25	335.712	66.4551	1.45537	0.0507595	0.12193
10342044	---			104.89	72.1157	33.0046	20.0817	1.45447	0.261893	0.25001
10532628	NM_028901	Myo18b	myosin XVIIIb	172.744	118.78	57.5333	39.3155	1.45432	0.303459	0.271378
10341274	---			568.325	390.827	218.093	34.9594	1.45416	0.292665	0.266
10516906	NR_028513	Snora73b	small nucleolar RNA	598.751	411.811	204.353	56.4814	1.45395	0.250939	0.244522
10434441	NM_025462	Ece2	endothelin converting enzyme 2	122.653	84.3873	7.08959	9.25191	1.45345	0.0473002	0.118518
10513381	NM_144904	Rod1	ROD1 regulator of differentiation 1 (S. pombe)	3650.98	2512.09	269.692	73.6091	1.45336	0.0120056	0.0713412
10338645	---			159.517	109.762	29.8167	21.5603	1.4533	0.123712	0.177223
10534960	NM_080450	Gjc3	gap junction protein	658.897	453.44	130.882	90.6169	1.45311	0.132722	0.182656
10517070	NM_001017968	Zdhhc18	zinc finger	4493.57	3092.47	414.947	292.54	1.45307	0.023216	0.0896985
10343793	---			167.909	115.567	31.2179	2.56722	1.45291	0.0994918	0.160247
10394831	ENSMUST00000101569	Gm5784	predicted gene 5784	468.389	322.432	65.5322	11.2068	1.45267	0.0558162	0.126948
10357103	NM_001081386	Cdh19	cadherin 19	676.152	465.512	53.0208	84.7791	1.45249	0.122554	0.176624
10343603	---			133.208	91.7194	31.7407	8.89786	1.45235	0.142537	0.188222
10342890	---			367.002	252.763	42.7655	107.929	1.45196	0.358251	0.29638
10342073	---			161.796	111.445	20.1148	2.97678	1.45181	0.0454441	0.11654
10388310	NM_001015046	Rap1gap2	RAP1 GTPase activating protein 2	2750.16	1894.84	255.336	113.661	1.4514	0.0164074	0.0797334
10356628	NM_207225	Hdac4	histone deacetylase 4	1029.69	709.5	110.282	2.13869	1.45129	0.0372754	0.108199
10491597	NM_172679	4932438A13Rik	RIKEN cDNA 4932438A13 gene	1463.38	1008.35	99.0628	21.0022	1.45127	0.0115267	0.0708158
10384233	NM_001083587	Tns3	tensin 3	341.888	235.601	30.4604	18.4685	1.45113	0.0167931	0.0798951
10340120	---			109.422	75.405	7.314	11.9917	1.45112	0.103419	0.163239
10528257	NM_001080977	Rsbn1l	round spermatid basic protein 1-like	885.857	610.465	71.1835	35.18	1.45112	0.0110965	0.0698285
10397482	NM_172583	Tmem63c	transmembrane protein 63c	4397.69	3030.89	219.107	17.8483	1.45096	0.00797529	0.0608754
10569733	NM_133962	Arhgef18	rho	578.365	398.655	27.468	10.3435	1.45079	0.00306067	0.04618
10338885	---			1442.45	994.383	360.152	120.603	1.4506	0.154797	0.195747
10478949	NM_029761	Dok5	docking protein 5	700.623	483.276	180.508	45.3325	1.44974	0.16488	0.201013
10509441	NM_199307	Ece1	endothelin converting enzyme 1	1917.49	1322.74	83.862	6.02075	1.44964	0.00624475	0.0564018
10491627	NM_172679	4932438A13Rik	RIKEN cDNA 4932438A13 gene	2365.32	1632.6	120.38	56.3496	1.44881	0.00314572	0.0462325
10341075	---			203.366	140.418	55.9347	3.28404	1.44829	0.190015	0.213991
10549276	NM_024469	Bhlhe41	basic helix-loop-helix family	1517.35	1047.73	396.09	107.604	1.44822	0.168641	0.203166
10566822	NM_020052	Scube2	signal peptide	159.118	109.906	4.51691	22.6313	1.44776	0.192331	0.215183
10344120	---			115.706	79.9211	31.5764	1.00765	1.44775	0.188471	0.213446
10362811	NM_001162908	Sesn1	sestrin 1	1074.55	742.343	47.086	8.2119	1.44751	0.00502326	0.0517624
10556206	NR_028079	Snora3	small nucleolar RNA	288.029	199.008	143.411	0.97227	1.44732	0.394791	0.313153
10434758	NM_145933	St6gal1	beta galactoside alpha 2	1413.3	976.693	86.1961	134.699	1.44703	0.0826196	0.149123
10422822	NM_013584	Lifr	leukemia inhibitory factor receptor	6791.87	4693.84	154.278	40.3269	1.44698	0.000793152	0.0336089
10501494	NM_001190403	Amy2b	amylase 2b	142.428	98.4474	38.4082	1.1069	1.44674	0.185646	0.21218
10478754	NM_001085495	Arfgef2	ADP-ribosylation factor guanine nucleotide-exchange factor 2 (brefeldin A-inhibited)	2961.3	2047.6	146.651	50.7176	1.44623	0.00379995	0.048193
10498576	NM_016753	Lxn	latexin	6389.36	4418.72	415.05	258.744	1.44597	0.00740196	0.0589815
10476939	NM_001142411	Gm4979	predicted gene 4979	583.774	403.753	54.0513	48.0973	1.44587	0.0411346	0.111379
10550734	NM_001109748	Tomm40	translocase of outer mitochondrial membrane 40 homolog (yeast)	247.876	171.468	57.9596	17.9289	1.44561	0.139777	0.18637
10430372	NM_009008	Rac2	RAS-related C3 botulinum substrate 2	150.855	104.4	43.1052	29.4746	1.44497	0.2502	0.244221
10460317	NM_008851	Pitpnm1	phosphatidylinositol transfer protein	1115.04	771.827	60.6684	39.9671	1.44468	0.00495931	0.0516908
10540493	NM_138677	Edem1	ER degradation enhancer	1354.6	937.757	69.2895	20.3329	1.44451	0.00489345	0.0516575
10493421	BC088990	Fam189b	family with sequence similarity 189	5159.68	3572.36	722.407	15.4984	1.44434	0.0625295	0.133542
10439005	NM_025800	Ppp1r2	protein phosphatase 1	2316.78	1604.61	258.084	37.4166	1.44383	0.0376257	0.108452
10576495	NM_198632	Trim67	tripartite motif-containing 67	2052.05	1421.3	164.477	65.0502	1.44378	0.0119877	0.0714694
10388545	NM_198895	Abr	active BCR-related gene	3805.3	2635.76	130.804	59.5471	1.44372	0.0010743	0.0346681
10480714	NM_001033293	Uap1l1	UDP-N-acteylglucosamine pyrophosphorylase 1-like 1	290.11	200.967	16.312	2.87116	1.44357	0.0086538	0.0626779
10492826	NM_001177773	Fbxw7	F-box and WD-40 domain protein 7	729.445	505.404	59.9536	15.2461	1.44329	0.0165624	0.0795066
10442887	NM_001164225	Fbxl16	F-box and leucine-rich repeat protein 16	2062.45	1429.27	233.126	28.0927	1.44301	0.039832	0.110492
10344383	---			256.131	177.504	24.6621	22.505	1.44296	0.0482474	0.118985
10412100	NM_011945	Map3k1	mitogen-activated protein kinase kinase kinase 1	562.02	389.609	144.291	17.681	1.44252	0.171838	0.205138
10356771	NM_178051	Mterfd2	MTERF domain containing 2	229.769	159.331	39.1364	27.593	1.44209	0.102892	0.162717
10594928	NM_018889	Pigb	phosphatidylinositol glycan anchor biosynthesis	653.204	452.958	68.4568	45.8407	1.44209	0.0307236	0.100433
10339953	---			555.321	385.102	166.531	64.2342	1.44201	0.21687	0.228327
10358591	NM_001024720	Hmcn1	hemicentin 1	135.435	93.9408	3.5614	1.29767	1.4417	0.000693019	0.0341538
10411690	NM_011233	Rad17	RAD17 homolog (S. pombe)	326.6	226.636	31.2324	37.0411	1.44108	0.0907203	0.154896
10527982	BC062906	A330021E22Rik	RIKEN cDNA A330021E22 gene	378.283	262.558	66.761	29.8196	1.44076	0.0819542	0.148781
10358595	NM_001024720	Hmcn1	hemicentin 1	107.705	74.7637	8.42926	3.64658	1.44061	0.0109783	0.0695674
10342104	---			109.917	76.3186	21.2848	10.9888	1.44024	0.104845	0.164259
10552964	NM_010240	Ftl1	ferritin light chain 1	1494.54	1037.72	319.148	5.70999	1.44021	0.131316	0.182159
10380654	NM_001079869	Hoxb3	homeobox B3	445.469	309.353	34.0606	8.17729	1.44	0.0146919	0.077188
10343717	---			245.136	170.235	73.1277	26.4823	1.43998	0.214782	0.22721
10503382	NM_001111027	Runx1t1	runt-related transcription factor 1; translocated to	725.838	504.19	90.8279	41.3208	1.43961	0.0369163	0.107882
10511084	NM_138671	Nadk	NAD kinase	1047.24	727.57	47.1814	94.0027	1.43937	0.091818	0.155598
10353181	NM_145381	Lactb2	lactamase	1471.05	1022.11	126.814	39.4267	1.43922	0.016763	0.0798355
10396926	NM_001079695	Srsf5	serine	717.004	498.236	129.032	29.761	1.43908	0.0901443	0.154465
10347460	NM_001014974	Ttll4	tubulin tyrosine ligase-like family	222.565	154.704	38.7243	15.6294	1.43865	0.079236	0.147025
10591816	NM_172920	Dpy19l1	dpy-19-like 1 (C. elegans)	481.237	334.517	63.5647	69.6921	1.4386	0.133898	0.183274
10434782	NM_178665	Lpp	LIM domain containing preferred translocation partner in lipoma	279.28	194.136	27.3596	31.4304	1.43858	0.0885513	0.152978
10412667	NM_008981	Ptprg	protein tyrosine phosphatase	1402.6	974.999	83.8051	92.1737	1.43857	0.0311523	0.100997
10360589	NM_026375	Ahctf1	AT hook containing transcription factor 1	1048.53	728.976	112.948	64.2033	1.43835	0.0276263	0.0959094
10558515	NM_001127363	Inpp5a	inositol polyphosphate-5-phosphatase A	628.878	437.256	52.0791	35.0011	1.43824	0.0169379	0.0803731
10399421	NM_008709	Mycn	v-myc myelocytomatosis viral related oncogene	288.844	200.847	50.8288	6.93064	1.43813	0.0917964	0.155678
10556302	NM_009667	Ampd3	adenosine monophosphate deaminase 3	2127.2	1479.28	245.555	48.7932	1.438	0.0385384	0.109482
10502058	NM_145964	Ap1ar	adaptor-related protein complex 1 associated regulatory protein	6455.97	4489.84	419.248	121.211	1.4379	0.00901111	0.0641891
10467979	NM_009127	Scd1	stearoyl-Coenzyme A desaturase 1	10235.8	7119.88	203.163	385.045	1.43763	0.0275819	0.0958288
10358573	NM_001024720	Hmcn1	hemicentin 1	154.053	107.178	2.96965	19.3323	1.43735	0.175879	0.207153
10562729	---			281.188	195.635	71.5126	60.2802	1.43731	0.257841	0.247943
10495873	NM_008972	Ptma	prothymosin alpha	4792.61	3335.02	256.846	73.0939	1.43706	0.00579186	0.0551108
10576795	ENSMUST00000111031	Cd209a	CD209a antigen	657.29	457.616	308.654	10.5692	1.43633	0.378976	0.305472
10531737	NM_152803	Hpse	heparanase	224.269	156.164	23.8044	9.74271	1.43611	0.0250166	0.0925165
10559766	NM_001033249	Zfp583	zinc finger protein 583	243.368	169.491	21.0716	26.9697	1.43587	0.0926754	0.156089
10342163	---			366.118	255.015	40.2916	112.775	1.43567	0.383485	0.307629
10358549	NM_001024720	Hmcn1	hemicentin 1	134.879	93.9532	21.1822	1.29724	1.43559	0.0780697	0.146177
10509039	NM_030189	4930555I21Rik	RIKEN cDNA 4930555I21 gene	468.683	326.494	75.9211	9.37962	1.4355	0.0802117	0.147897
10423363	NM_020332	Ank	progressive ankylosis	2332.21	1624.72	48.8905	11.5224	1.43545	0.000786772	0.0339735
10455294	NM_026135	Kctd16	potassium channel tetramerisation domain containing 16	3872.26	2697.74	227.587	23.4185	1.43537	0.0113236	0.0702342
10548905	NM_007945	Eps8	epidermal growth factor receptor pathway substrate 8	224.745	156.597	34.7268	16.8728	1.43518	0.0631963	0.133831
10474006	NM_001109691	Phf21a	PHD finger protein 21A	508.406	354.304	53.1301	50.3618	1.43494	0.0645254	0.13535
10380514	NM_172543	Fam117a	family with sequence similarity 117	332.667	231.838	10.2108	39.7958	1.43492	0.16053	0.198892
10338003	---			1367.25	953.032	640.281	66.4618	1.43463	0.378971	0.305495
10554233	NM_026531	Aen	apoptosis enhancing nuclease	433.412	302.11	31.3542	9.83386	1.43462	0.0111398	0.0700039
10490724	NM_172676	Samd10	sterile alpha motif domain containing 10	1370.69	955.608	66.1771	52.861	1.43437	0.00635037	0.056567
10554693	NM_023377	Stard5	StAR-related lipid transfer (START) domain containing 5	506.275	352.98	28.731	3.07329	1.43429	0.010516	0.0683579
10481383	NM_001008498	Wdr34	WD repeat domain 34	487.637	340.006	45.9365	46.8511	1.4342	0.0627216	0.133669
10478772	NM_001085495	Arfgef2	ADP-ribosylation factor guanine nucleotide-exchange factor 2 (brefeldin A-inhibited)	2662.61	1856.56	104.466	70.8051	1.43416	0.00218165	0.040959
10526848	NM_183025	A430033K04Rik	RIKEN cDNA A430033K04 gene	357.249	249.177	36.4562	3.91606	1.43372	0.0340141	0.104485
10416960	NM_175500	Gpc5	glypican 5	454.361	316.939	98.3615	21.342	1.43359	0.129182	0.180692
10508663	NM_010686	Laptm5	lysosomal-associated protein transmembrane 5	117.697	82.1023	22.9255	8.21668	1.43355	0.101958	0.161948
10546056	NM_001039394	Rab43	RAB43	188.335	131.383	15.4685	16.4843	1.43348	0.0538748	0.125266
10491603	NM_172679	4932438A13Rik	RIKEN cDNA 4932438A13 gene	1041.25	726.432	86.4884	6.64842	1.43337	0.0234256	0.0901243
10437451	NM_145359	Fam100a	family with sequence similarity 100	1843.6	1286.64	252.228	32.7155	1.43288	0.0588212	0.130095
10607225	NM_001081173	Lrch2	leucine-rich repeats and calponin homology (CH) domain containing 2	131.557	91.8227	7.81025	15.4965	1.43273	0.131012	0.18196
10338025	---			521.942	364.315	257.858	67.2869	1.43267	0.404529	0.316776
10434806	NM_178665	Lpp	LIM domain containing preferred translocation partner in lipoma	570.709	398.373	127.011	76.167	1.4326	0.154643	0.195661
10514173	NM_026724	Rpl34	ribosomal protein L34	186.421	130.131	47.0108	4.8167	1.43256	0.171988	0.205182
10422348	NM_001081252	Uggt2	UDP-glucose glycoprotein glucosyltransferase 2	214.907	150.089	28.0482	11.8642	1.43186	0.0421019	0.112653
10358091	NM_173437	Nav1	neuron navigator 1	3171.99	2215.31	194.553	62.2028	1.43184	0.00741458	0.0589268
10363786	NM_146005	Ank3	ankyrin 3	3496.44	2442.37	62.8959	132.737	1.43158	0.0320987	0.102023
10572533	NM_001142322	Myo9b	myosin IXb	517.961	361.838	17.0161	13.4239	1.43147	0.0022135	0.0413005
10356601	NM_011066	Per2	period homolog 2 (Drosophila)	314.92	220.108	34.3825	11.3516	1.43075	0.0293585	0.0982009
10560429	NM_145579	Mypop	Myb-related transcription factor	290.463	203.151	62.9474	7.74088	1.42979	0.135328	0.183816
10342926	---			198.773	139.032	37.211	2.02129	1.42969	0.10801	0.166315
10437541	NM_013796	Nagpa	N-acetylglucosamine-1-phosphodiester alpha-N-acetylglucosaminidase	475.154	332.386	39.1353	9.68646	1.42952	0.0177299	0.0816528
10378068	NM_001037713	Xaf1	XIAP associated factor 1	236.922	165.827	26.2719	9.0481	1.42873	0.0302029	0.0996652
10386705	NM_009548	Rnf112	ring finger protein 112	1069.83	748.83	96.1597	52.3289	1.42867	0.0172161	0.0807633
10476021	NM_007547	Sirpa	signal-regulatory protein alpha	1202.89	841.988	98.8736	49.6524	1.42863	0.0130516	0.0736479
10500324	NM_175662	Hist2h2ac	histone cluster 2	1067.96	747.549	275.885	65.5627	1.42861	0.175309	0.206858
10467003	NR_003650	Gm5972	protein phosphatase 1	5074.4	3552.34	183.743	20.4808	1.42847	0.00423869	0.0498528
10462390	NM_021893	Cd274	CD274 antigen	632.553	442.914	132.808	0.109809	1.42816	0.131899	0.182299
10491601	NM_172679	4932438A13Rik	RIKEN cDNA 4932438A13 gene	1257.38	880.606	88.2259	95.4826	1.42785	0.0421065	0.112632
10520612	NM_008439	Khk	ketohexokinase	412.711	289.086	47.4772	18.6255	1.42764	0.0318592	0.101761
10341318	---			115.203	80.7024	6.80256	1.42794	1.42751	0.00932056	0.0650145
10560919	NM_144921	Atp1a3	ATPase	5860.61	4105.53	449.748	21.5373	1.42749	0.0208932	0.0862749
10339027	---			209.8	146.976	82.7889	16.8019	1.42744	0.318477	0.27841
10571325	NM_001081279	Mfhas1	malignant fibrous histiocytoma amplified sequence 1	2082.02	1458.82	126.983	52.7813	1.42719	0.00607323	0.0556283
10342869	---			141.614	99.2299	84.5602	0.778288	1.42713	0.476837	0.346471
10355730	BC028815	1810031K17Rik	RIKEN cDNA 1810031K17 gene	583.107	408.601	16.8006	60.2153	1.42708	0.137569	0.185278
10413229	NM_013469	Anxa11	annexin A11	2820.27	1977.01	220.674	124.367	1.42653	0.0121682	0.0718365
10582477	NM_030176	Spata2L	spermatogenesis associated 2-like	179.393	125.763	15.6	13.3108	1.42644	0.0343759	0.104921
10606445	NM_025949	Rps6ka6	ribosomal protein S6 kinase polypeptide 6	200.226	140.391	39.2252	8.74965	1.4262	0.110168	0.167844
10399725	NM_009234	Sox11	SRY-box containing gene 11	656.957	460.676	326.207	199.906	1.42607	0.465885	0.341634
10348864	NM_025920	Thap4	THAP domain containing 4	103.994	72.9502	20.3453	2.77122	1.42555	0.114648	0.170963
10566132	NM_019566	Rhog	ras homolog gene family	855.904	600.409	157.635	117.028	1.42553	0.13516	0.183863
10478066	NM_175692	Snhg11	small nucleolar RNA host gene 11	2394.16	1679.78	131.309	140.787	1.42529	0.0251798	0.0925914
10434224	BC029862	Gnb1l	guanine nucleotide binding protein (G protein)	119.382	83.7647	26.1791	20.0435	1.4252	0.191509	0.214793
10391744	AK135410	Gpatch8	G patch domain containing 8	107.468	75.4274	12.6526	1.97719	1.42478	0.0440388	0.114787
10549588	NM_029767	Rps9	ribosomal protein S9	1836.91	1289.33	336.698	152.402	1.4247	0.0942681	0.157194
10564290	NM_021366	Klf13	Kruppel-like factor 13	1079.65	757.875	187.455	61.5264	1.42458	0.0837069	0.149774
10583992	NM_001129787	Igsf9b	immunoglobulin superfamily	712.782	500.367	112.042	68.8518	1.42452	0.0790468	0.146885
10589960	NM_028638	Gadl1	glutamate decarboxylase-like 1	156.392	109.835	9.86082	3.81733	1.42389	0.0070593	0.0583534
10491599	NM_172679	4932438A13Rik	RIKEN cDNA 4932438A13 gene	1213.3	852.147	66.5715	33.8744	1.42382	0.00430919	0.050033
10496638	NM_001162538	Odf2l	outer dense fiber of sperm tails 2-like	219.958	154.487	37.878	24.1391	1.42379	0.100199	0.160929
10507379	NM_001029912	Zswim5	zinc finger	1823.83	1281.13	96.6079	17.3553	1.42361	0.00808174	0.061122
10545192	NR_004434	Rprl1	ribonuclease P RNA-like 1	202.681	142.395	105.909	14.6739	1.42337	0.428821	0.327209
10343731	---			108.875	76.4917	19.7195	2.49931	1.42336	0.101307	0.161763
10523518	NM_026421	Enoph1	enolase-phosphatase 1	619.835	435.594	54.915	12.3483	1.42296	0.0222757	0.0884395
10372069	NM_007706	Socs2	suppressor of cytokine signaling 2	594.344	417.703	103.216	36.5978	1.42289	0.0836153	0.149699
10338161	---			375.187	263.739	42.3671	47.7667	1.42257	0.113579	0.17049
10403413	NM_145360	Idi1	isopentenyl-diphosphate delta isomerase	1897.39	1334.04	326.972	32.4219	1.4223	0.0942626	0.157214
10338277	---			632.034	444.447	340.184	105.624	1.42207	0.449081	0.335304
10425012	NM_145916	Zfp7	zinc finger protein 7	149.288	104.983	14.8458	13.6901	1.42202	0.0569909	0.128046
10338965	---			176.015	123.806	43.4853	48.2971	1.4217	0.339577	0.288593
10542060	---			205.806	144.773	20.6922	5.37807	1.42157	0.027813	0.0962259
10350742	NM_011882	Rnasel	ribonuclease L (2'	658.037	463.09	243.263	76.9236	1.42097	0.300993	0.270105
10563480	NM_010602	Kcnj11	potassium inwardly rectifying channel	134.12	94.3877	5.28096	3.18028	1.42095	0.00186431	0.039499
10483025	NM_001141932	Rbms1	RNA binding motif	2658.66	1871.82	71.2098	1.51278	1.42036	0.00270398	0.0444197
10338035	---			520.149	366.259	231.531	40.6914	1.42017	0.368972	0.300804
10527115	NM_172725	C330006K01Rik	RIKEN cDNA C330006K01 gene	497.892	350.644	29.5717	16.3252	1.41994	0.00567808	0.0548921
10342149	---			264.185	186.064	37.2979	42.0608	1.41986	0.164538	0.200758
10491621	NM_172679	4932438A13Rik	RIKEN cDNA 4932438A13 gene	2014.34	1418.89	41.5148	92.0523	1.41965	0.0437665	0.114505
10339227	---			103.986	73.2488	28.4999	1.4005	1.41962	0.202329	0.220625
10497079	NM_011196	Ptger3	prostaglandin E receptor 3 (subtype EP3)	343.244	241.809	42.7925	9.41585	1.41948	0.0467942	0.117968
10341124	---			114.909	80.9527	23.144	1.23851	1.41946	0.12559	0.178364
10552458	NM_145582	Ctu1	cytosolic thiouridylase subunit 1 homolog (S. pombe)	155.079	109.262	8.62437	1.61445	1.41934	0.00893829	0.064073
10522378	NM_153567	Slain2	SLAIN motif family	2287.25	1611.7	15.162	70.3355	1.41915	0.0409343	0.111302
10338331	---			136.037	95.873	36.7034	9.89161	1.41892	0.192085	0.215041
10434313	NM_001145930	Yeats2	YEATS domain containing 2	446.951	314.998	37.1588	23.9919	1.4189	0.017438	0.0812161
10381683	NM_025988	Acbd4	acyl-Coenzyme A binding domain containing 4	393.558	277.43	20.3656	7.6432	1.41859	0.00441135	0.0504441
10343381	---			120.865	85.2016	32.1108	14.199	1.41858	0.193948	0.216033
10573008	NM_178267	Zfp827	zinc finger protein 827	1305.25	920.306	44.2729	14.3321	1.41828	0.00176004	0.0391177
10344321	---			122.997	86.7285	18.4071	10.3752	1.41818	0.0674137	0.137465
10385699	NM_025346	Rmnd5b	required for meiotic nuclear division 5 homolog B (S. cerevisiae)	2605.39	1837.67	233.506	125.773	1.41777	0.0178331	0.0816722
10476900	NM_177655	Cstl1	cystatin-like 1	236.653	166.944	40.4935	17.4291	1.41756	0.0827437	0.149199
10343421	---			389.503	274.863	84.3131	27.8941	1.41708	0.131874	0.18232
10341345	---			101.678	71.766	13.5149	13.327	1.4168	0.117965	0.173485
10574259	NM_018882	Gpr56	G protein-coupled receptor 56	5098.91	3599.08	283.603	10.6614	1.41672	0.0115781	0.0707955
10344183	---			126.731	89.4741	42.3331	8.35085	1.4164	0.264445	0.251256
10362896	NM_009846	Cd24a	CD24a antigen	9321.84	6583.81	801.386	697.62	1.41587	0.0367085	0.107656
10578207	NM_001081150	Lonrf1	LON peptidase N-terminal domain and ring finger 1	443.73	313.398	45.2271	60.9137	1.41587	0.13972	0.186376
10376988	NM_026107	Zkscan6	zinc finger with KRAB and SCAN domains 6	132.63	93.6808	22.8212	18.1615	1.41577	0.134129	0.183369
10569542	NM_175534	Mrgpre	MAS-related GPR	895.336	632.628	134.193	52.7532	1.41526	0.0621003	0.133064
10608136	---			235.147	166.168	114.777	23.1847	1.41512	0.408903	0.318578
10574939	NM_173432	Pskh1	protein serine kinase H1	852.492	602.538	59.5418	9.77797	1.41484	0.0155221	0.0784583
10503259	NM_021897	Trp53inp1	transformation related protein 53 inducible nuclear protein 1	1015.21	717.659	74.8209	63.5092	1.41462	0.024064	0.0910735
10565067	NM_026523	Nmb	neuromedin B	2657.89	1878.97	369.708	167.376	1.41455	0.0526644	0.123881
10473965	NR_027373	Arhgap1	Rho GTPase activating protein 1	2373.33	1678.09	187.892	88.3318	1.4143	0.0125084	0.0726162
10476301	NM_001177833	Smox	spermine oxidase	866.985	613.143	129.127	35.7757	1.414	0.0651377	0.135755
10406598	NM_172588	Serinc5	serine incorporator 5	4278.12	3025.85	33.5061	47.0592	1.41386	0.002283	0.0421635
10384458	NM_019549	Plek	pleckstrin	365.875	258.871	17.8575	14.7911	1.41335	0.00809262	0.0610515
10491619	NM_172679	4932438A13Rik	RIKEN cDNA 4932438A13 gene	1882.93	1332.53	66.6838	44.1521	1.41305	0.00169726	0.038964
10466818	NR_033744	Cbwd1	COBW domain containing 1	338.194	239.342	49.0089	40.1696	1.41301	0.101286	0.161758
10343168	---			116.882	82.7452	7.46837	2.32173	1.41255	0.00906729	0.064387
10379836	NM_145433	Mrm1	mitochondrial rRNA methyltransferase 1 homolog (S. cerevisiae)	223.763	158.419	19.3012	5.40713	1.41247	0.0196982	0.0849372
10386070	NM_009720	Atox1	ATX1 (antioxidant protein 1) homolog 1 (yeast)	1552.23	1099.13	171.573	189.269	1.41224	0.107859	0.166282
10468275	NM_027654	Pcgf6	polycomb group ring finger 6	634.766	449.525	32.1252	56.435	1.41208	0.0885325	0.152975
10357051	NM_027534	Kdsr	3-ketodihydrosphingosine reductase	1804.52	1278.06	160.343	43.0617	1.41191	0.0215731	0.0874886
10338998	---			164.19	116.338	46.2714	69.9816	1.41132	0.50304	0.356679
10401114	NM_134050	Rab15	RAB15	2060.86	1460.32	115.041	56.3608	1.41124	0.00480491	0.0512599
10562649	---			1886.31	1336.71	702.113	321.92	1.41116	0.32531	0.281776
10436182	NM_010581	Cd47	CD47 antigen (Rh-related antigen	4672.31	3312.06	562.414	243.858	1.4107	0.037678	0.108499
10435832	NM_001029889	Gm608	predicted gene 608	499.001	353.747	72.2413	2.38955	1.41061	0.0732434	0.142221
10500011	NM_011656	Tuft1	tuftelin 1	288.486	204.574	74.3837	11.5057	1.41018	0.186451	0.212779
10447591	NM_010240	Ftl1	ferritin light chain 1	455.333	322.897	114.359	13.855	1.41015	0.180342	0.209633
10340955	---			124.471	88.2716	47.0721	24.2441	1.4101	0.342683	0.289874
10353213	NM_010827	Msc	musculin	161.733	114.697	16.1753	2.9404	1.41009	0.0322982	0.102191
10460631	NM_009045	Rela	v-rel reticuloendotheliosis viral oncogene homolog A (avian)	1087.27	771.116	142.235	76.9179	1.41	0.0492131	0.120254
10430201	NM_022410	Myh9	myosin	2363.72	1676.73	70.1902	27.3382	1.40972	0.00099946	0.0333202
10339160	---			138.747	98.4596	20.1042	33.1814	1.40917	0.301282	0.270256
10421774	NM_001081336	Dgkh	diacylglycerol kinase	6730.89	4777.04	452.703	220.776	1.40901	0.00819314	0.0612998
10504188	NM_011888	Ccl19	chemokine (C-C motif) ligand 19	169.787	120.501	61.5229	65.8613	1.409	0.48362	0.348856
10448192	---			314.837	223.488	29.3967	0.968152	1.40874	0.0326497	0.102659
10505326	NM_019492	Rgs3	regulator of G-protein signaling 3	173.745	123.375	11.2982	18.8939	1.40827	0.114034	0.170722
10379543	NM_023438	Tmem132e	transmembrane protein 132E	1240.31	880.812	142.65	153.586	1.40814	0.1113	0.168633
10586039	NM_001083927	Tle3	transducin-like enhancer of split 3	867.14	615.855	148.957	20.6968	1.40803	0.0960201	0.158744
10491820	BC145212	3110057O12Rik	RIKEN cDNA 3110057O12 gene	388.328	275.819	60.2445	11.4076	1.40791	0.0771534	0.145453
10354003	NM_173870	Mgat4a	mannoside acetylglucosaminyltransferase 4	1541.86	1095.2	98.8967	97.6664	1.40783	0.028412	0.0970395
10341600	---			388.445	275.95	121.177	47.9751	1.40767	0.251637	0.244964
10484203	NM_001025576	Ccdc141	coiled-coil domain containing 141	2615.33	1858.02	361.022	110.942	1.40759	0.0555088	0.126725
10474870	NM_173450	Rpusd2	RNA pseudouridylate synthase domain containing 2	309.767	220.125	32.6295	10.0152	1.40723	0.0304772	0.100024
10540860	NM_028835	Atg7	autophagy-related 7 (yeast)	1154.08	820.157	66.4511	21.1577	1.40714	0.00705368	0.0584668
10472181	NM_172855	Galnt5	UDP-N-acetyl-alpha-D-galactosamine:polypeptide N-acetylgalactosaminyltransferase 5	919.441	653.462	56.2166	22.7794	1.40703	0.00680681	0.0578483
10340715	---			535.889	380.868	149.752	80.5189	1.40702	0.231572	0.235387
10527327	NM_018772	Bri3	brain protein I3	554.277	393.972	52.4022	31.2305	1.40689	0.023476	0.0902036
10555233	---			174.529	124.061	75.0893	13.265	1.4068	0.364666	0.299095
10578149	NM_026609	Leprotl1	leptin receptor overlapping transcript-like 1	4181.74	2973.69	151.297	111.077	1.40625	0.00249553	0.0433514
10535739	NM_011669	Usp12	ubiquitin specific peptidase 12	1239.13	881.492	59.2232	6.60661	1.40572	0.00810569	0.0609978
10382028	NM_011947	Map3k3	mitogen-activated protein kinase kinase kinase 3	564.94	401.92	76.1032	25.355	1.4056	0.0520489	0.123039
10369525	BC024943	2010107G23Rik	RIKEN cDNA 2010107G23 gene	629.752	448.167	38.8014	20.5465	1.40517	0.00663109	0.0572129
10571922	NM_175089	Nek1	NIMA (never in mitosis gene a)-related expressed kinase 1	1497.08	1065.44	166.416	30.3599	1.40513	0.0407348	0.111327
10359255	NM_207583	Fam5b	family with sequence similarity 5	490.075	348.829	75.6339	42.8207	1.40492	0.0764892	0.144833
10574059	NM_019415	Slc12a3	solute carrier family 12	120.895	86.0528	26.4289	10.3588	1.40489	0.140378	0.186759
10338150	---			1335.57	950.767	213.111	273.263	1.40473	0.246698	0.242237
10569513	NM_024289	Osbpl5	oxysterol binding protein-like 5	1007.29	717.158	68.2268	8.38156	1.40456	0.01625	0.0795653
10344521	---			478.668	340.814	46.4446	54.9841	1.40449	0.102675	0.162545
10537728	NM_007610	Casp2	caspase 2	209.19	148.969	6.56689	10.9033	1.40425	0.0400908	0.110904
10392096	---			192.24	136.919	48.6327	8.75869	1.40404	0.183153	0.211086
10408937	NM_009124	Atxn1	ataxin 1	1098.38	782.361	98.6462	114.068	1.40393	0.0854552	0.150936
10343644	---			343.356	244.603	46.0443	50.3504	1.40373	0.150274	0.192905
10545130	NM_007836	Gadd45a	growth arrest and DNA-damage-inducible 45 alpha	694.327	494.716	137.453	118.133	1.40349	0.196621	0.217673
10424126	NM_001037937	Depdc6	DEP domain containing 6	2646.27	1885.88	166.158	12.139	1.4032	0.0149676	0.0776911
10578681	---			764.091	544.613	79.076	59.1966	1.403	0.0425171	0.113229
10489355	ENSMUST00000017961	Jph2	junctophilin 2	167.349	119.288	13.8067	30.5699	1.4029	0.239308	0.238519
10341281	---			150.302	107.174	4.79655	15.3042	1.40241	0.138219	0.185492
10344095	---			185.765	132.483	74.9774	8.16449	1.40218	0.343167	0.290148
10517067	NM_018754	Sfn	stratifin	240.881	171.834	15.5371	36.0313	1.40183	0.194741	0.216596
10474825	NM_026412	D2Ertd750e	DNA segment	122.092	87.1065	5.40802	3.96903	1.40164	0.00445874	0.0504767
10549751	NM_001033383	Zfp865	zinc finger protein 865	428.303	305.59	55.1491	50.6157	1.40156	0.102031	0.162006
10532784	NM_026805	Svop	SV2 related protein	1226.9	875.569	190.914	103.25	1.40126	0.0768048	0.145067
10566161	NM_198012	Trim68	tripartite motif-containing 68	303.927	216.897	14.8287	6.98199	1.40125	0.00347913	0.0469475
10355514	NM_027884	Tns1	tensin 1	2534.08	1808.65	188.66	65.3275	1.4011	0.012852	0.0732509
10518108	NM_145402	Tmem51	transmembrane protein 51	192.15	137.153	31.8284	11.9482	1.40099	0.0816834	0.148617
10338814	---			450.394	321.487	28.3325	78.9611	1.40097	0.239301	0.238538
10591446	NM_018793	Tyk2	tyrosine kinase 2	339.398	242.278	44.7892	27.0864	1.40086	0.05699	0.128076
10364559	NM_007880	Arid3a	AT rich interactive domain 3A (BRIGHT-like)	261.109	186.415	4.77973	19.5341	1.40068	0.105367	0.164509
10600150	NM_031494	Zfp275	zinc finger protein 275	628.675	448.96	89.072	13.0467	1.40029	0.068849	0.138738
10514255	NM_027326	Mllt3	myeloid	1208.54	863.08	11.005	45.6915	1.40026	0.0511984	0.122466
10538939	NM_010121	Eif2ak3	eukaryotic translation initiation factor 2 alpha kinase 3	1112.22	794.396	128.337	43.943	1.40009	0.0372197	0.108245
10389752	NM_008711	Nog	noggin	157.157	112.253	10.2977	13.4619	1.40003	0.0680836	0.13821
10467921	NM_007700	Chuk	conserved helix-loop-helix ubiquitous kinase	565.748	404.193	121.123	47.4393	1.3997	0.137337	0.185186
10467871	NM_028029	Dnmbp	dynamin binding protein	342.469	244.717	30.4193	39.7898	1.39945	0.11167	0.168911
10474689	NM_026620	Fam98b	family with sequence similarity 98	629.372	449.957	33.2475	50.228	1.39874	0.0695015	0.139156
10466865	NM_011265	Rfx3	regulatory factor X	177.076	126.636	15.5299	16.8909	1.39831	0.0720411	0.141064
10344231	---			140.83	100.732	24.3949	13.3922	1.39808	0.0993503	0.160218
10520355	NM_008314	Htr5a	5-hydroxytryptamine (serotonin) receptor 5A	273.87	195.915	11.4166	15.8661	1.3979	0.0382829	0.109201
10339318	---			307.037	219.774	113.868	59.6243	1.39706	0.345849	0.291329
10338294	---			405.559	290.318	126.497	21.0828	1.39695	0.252969	0.245549
10338036	---			703.218	503.456	323.004	127.673	1.39678	0.412005	0.320142
10394971	NM_178357	Klf11	Kruppel-like factor 11	553.058	396.284	8.27942	26.0226	1.39561	0.059359	0.130552
10559420	NM_181820	Tmc4	transmembrane channel-like gene family 4	176.003	126.131	30.0806	2.13791	1.39539	0.101803	0.161871
10457942	NM_009308	Syt4	synaptotagmin IV	5651.35	4050.45	128.406	204.354	1.39524	0.0223735	0.0885953
10377859	NM_008876	Pld2	phospholipase D2	466.449	334.397	23.7314	17.9614	1.3949	0.00734747	0.0590141
10515712	NM_198170	Szt2	seizure threshold 2	342.981	245.897	47.6706	4.8417	1.39481	0.0697011	0.139279
10413185	NM_183208	Zmiz1	zinc finger	1244.5	892.341	180.764	31.0312	1.39465	0.0721654	0.141155
10417310	ENSMUST00000100902	1700110I01Rik	RIKEN cDNA 1700110I01 gene	110.28	79.0878	37.0716	21.3212	1.3944	0.319151	0.278704
10505143	ENSMUST00000107600	Akap2	A kinase (PRKA) anchor protein 2	1315.46	943.516	130.551	46.1361	1.39421	0.026471	0.0946152
10341166	---			118.649	85.1044	28.6407	33.3276	1.39416	0.364814	0.299162
10546706	NM_019743	Rybp	RING1 and YY1 binding protein	1166.24	836.623	145.81	99.4092	1.39399	0.0593979	0.13048
10527441	NM_023142	Arpc1b	actin related protein 2	7005.27	5025.55	557.453	566.994	1.39393	0.0510581	0.122356
10340059	---			251.899	180.713	79.3764	17.4886	1.39392	0.25768	0.247919
10477147	NM_001159551	H13	histocompatibility 13	4401.17	3157.43	203.261	16.2216	1.39391	0.00830989	0.0617656
10344214	---			106.364	76.3092	34.2973	1.20606	1.39386	0.268239	0.253321
10449873	NR_033525	Wiz	widely-interspaced zinc finger motifs	631.794	453.316	55.5318	19.2997	1.39372	0.0199287	0.0851216
10533367	NM_028037	Acad10	acyl-Coenzyme A dehydrogenase family	143.427	102.912	22.7589	0.105502	1.39369	0.0910421	0.155153
10401343	NM_001174107	Map3k9	mitogen-activated protein kinase kinase kinase 9	1150.34	825.524	136.222	20.6804	1.39346	0.049781	0.120958
10376074	NM_001136076	P4ha2	procollagen-proline	201.914	144.909	6.91983	26.0923	1.39338	0.185902	0.212339
10358563	NM_001024720	Hmcn1	hemicentin 1	159.705	114.657	15.7402	3.32708	1.3929	0.031983	0.101905
10429298	NM_180662	Trappc9	trafficking protein particle complex 9	1640.83	1178.05	80.3776	76.6627	1.39283	0.0147699	0.0775075
10341187	---			133.413	95.8062	24.7084	32.4787	1.39253	0.312127	0.275354
10341718	---			291.071	209.049	8.76983	2.52714	1.39236	0.00171014	0.0389636
10559312	NM_007856	Dhcr7	7-dehydrocholesterol reductase	2559.47	1838.4	191.576	228.68	1.39222	0.069556	0.139204
10525495	BC038367	Setd1b	SET domain containing 1B	428.3	307.647	32.7465	1.20779	1.39218	0.0234942	0.0901588
10606575	ENSMUST00000072789	Gm10063	predicted gene 10063	192.86	138.595	99.0187	10.4978	1.39153	0.443144	0.333148
10541307	NM_011909	Usp18	ubiquitin specific peptidase 18	420.059	301.919	117.181	10.283	1.3913	0.221842	0.230801
10338746	---			162.912	117.128	18.8797	16.1492	1.39088	0.0748992	0.143561
10407209	NM_178746	Slc38a9	solute carrier family 38	540.517	388.636	73.9042	0.217637	1.3908	0.0706595	0.140114
10471171	NM_001033389	Fubp3	far upstream element (FUSE) binding protein 3	978.347	703.487	67.948	13.0723	1.39071	0.015866	0.0790944
10393573	NM_011150	Lgals3bp	lectin	2794.33	2009.49	266.216	179.258	1.39057	0.030378	0.0998072
10338209	---			279.5	201.001	40.6441	49.2684	1.39054	0.208102	0.223534
10423825	NM_008056	Fzd6	frizzled homolog 6 (Drosophila)	100.868	72.5482	9.02046	12.9087	1.39036	0.138266	0.185527
10374478	NM_021372	Sertad2	SERTA domain containing 2	688.168	495.016	71.5789	8.53594	1.39019	0.0403872	0.111046
10338561	---			370.789	266.747	80.6688	84.3241	1.39004	0.293064	0.266283
10574141	NM_001033207	Nlrc5	NLR family	197.393	142.074	25.7056	27.2238	1.38937	0.141177	0.187218
10565072	NM_019951	Sec11a	SEC11 homolog A (S. cerevisiae)	793.002	570.794	16.3333	8.52549	1.3893	0.000294225	0.0329387
10491613	NM_172679	4932438A13Rik	RIKEN cDNA 4932438A13 gene	2139.43	1540.39	156.442	20.4309	1.38889	0.0198652	0.0851714
10447431	NM_180974	Foxn2	forkhead box N2	210.713	151.716	26.0881	2.53346	1.38886	0.0575626	0.128598
10343440	---			208.202	149.912	50.5529	42.0936	1.38882	0.268249	0.253305
10457927	---			152.557	109.853	32.32	0.931108	1.38874	0.149151	0.192472
10608373	NM_023546	Ssty2	spermiogenesis specific transcript on the Y 2	232.159	167.177	102.821	32.7513	1.3887	0.395033	0.313154
10400126	NM_010733	Lrrn3	leucine rich repeat protein 3	1122.26	808.166	98.7642	9.22592	1.38866	0.0300506	0.0994884
10399882	NM_028002	Dus4l	dihydrouridine synthase 4-like (S. cerevisiae)	107.334	77.3088	14.5981	10.0699	1.38839	0.0749492	0.143596
10498998	NM_172681	D930015E06Rik	RIKEN cDNA D930015E06 gene	1182.11	851.519	55.3717	53.2893	1.38824	0.0140579	0.0760604
10345183	NM_194446	Cdk10	cyclin-dependent kinase 10	220.854	159.107	66.0888	36.2353	1.38808	0.271897	0.255207
10497920	NM_001167883	Ankrd50	ankyrin repeat domain 50	1201.97	865.985	110.655	25.6814	1.38798	0.0273024	0.0954427
10394735	NM_027959	Pdia6	protein disulfide isomerase associated 6	1068.99	770.295	25.576	98.8478	1.38776	0.133527	0.183264
10443201	NM_011861	Pacsin1	protein kinase C and casein kinase substrate in neurons 1	2658.79	1915.91	56.8774	48.2382	1.38774	0.00120831	0.0354595
10419726	---			223.394	161.02	1.43761	33.3586	1.38736	0.229804	0.23459
10338651	---			195.165	140.682	12.8805	25.2455	1.38728	0.161179	0.199179
10366983	NM_001113211	Tmem194	transmembrane protein 194	233.866	168.633	34.7043	32.7687	1.38684	0.145945	0.190285
10342548	---			376.195	271.266	74.7755	19.0189	1.38681	0.126499	0.179009
10438262	NM_153150	Slc25a1	solute carrier family 25 (mitochondrial carrier	4183.45	3016.83	77.5509	231.656	1.3867	0.0710751	0.140294
10529034	NM_026770	Cgref1	cell growth regulator with EF hand domain 1	1973.99	1423.78	187.016	116.204	1.38644	0.0272784	0.0954691
10493177	NM_133665	Mef2d	myocyte enhancer factor 2D	1369.11	987.611	248.537	3.96587	1.38629	0.117074	0.17265
10515714	NM_198170	Szt2	seizure threshold 2	463.244	334.252	78.3714	42.5236	1.38591	0.0984023	0.159941
10338610	---			415.277	299.647	66.4993	69.715	1.38589	0.194877	0.216641
10493189	ENSMUST00000001455	Mef2d	myocyte enhancer factor 2D	277.74	200.411	104.344	19.3645	1.38585	0.327304	0.282855
10589929	NM_026036	Cmtm6	CKLF-like MARVEL transmembrane domain containing 6	674.198	486.506	73.8094	25.4022	1.3858	0.0349486	0.105744
10600810	---			171.105	123.473	26.5016	15.3187	1.38577	0.0846199	0.15034
10464672	NM_198113	Ssh3	slingshot homolog 3 (Drosophila)	272.882	196.919	52.8559	29.519	1.38575	0.132268	0.182475
10481700	NM_178595	Ptrh1	peptidyl-tRNA hydrolase 1 homolog (S. cerevisiae)	101.313	73.1541	16.1105	8.91227	1.38492	0.0873552	0.152305
10425880	NM_146061	Prr5	proline rich 5 (renal)	2010.68	1452.05	286.346	73.9105	1.38472	0.067139	0.137337
10549877	---			373.156	269.5	180.981	53.0372	1.38462	0.432554	0.328619
10462521	NM_008960	Pten	phosphatase and tensin homolog	6264.97	4524.88	136.583	143.856	1.38456	0.00389861	0.0485612
10553450	NM_001037906	Nell1	NEL-like 1 (chicken)	160.338	115.839	48.3155	25.9494	1.38415	0.275157	0.256832
10608650	---			2460.35	1777.91	105.903	169.125	1.38384	0.0610017	0.1318
10495896	NM_001025439	Camk2d	calcium	4870.98	3521.51	123.878	166.24	1.38321	0.0154214	0.0783864
10516666	NM_001005506	Txlna	taxilin alpha	1134.08	819.945	90.7873	33.1429	1.38312	0.0162176	0.0796217
10341238	---			118.003	85.3305	55.9511	0.958237	1.38289	0.418287	0.322591
10343796	---			234.714	169.739	80.5734	34.7959	1.38279	0.309499	0.273942
10393851	NM_024229	Pcyt2	phosphate cytidylyltransferase 2	1213.91	877.874	28.9494	123.127	1.38279	0.15059	0.192983
10344174	---			120.032	86.8188	20.3657	46.3835	1.38255	0.487055	0.350053
10469514	NM_007552	Bmi1	Bmi1 polycomb ring finger oncogene	331.491	239.866	39.7625	11.6331	1.38198	0.045876	0.117118
10491977	NM_173382	2810046L04Rik	RIKEN cDNA 2810046L04 gene	1231.12	890.852	141.116	50.3645	1.38196	0.039136	0.110076
10342146	---			126.333	91.4259	31.8037	24.4316	1.38181	0.26721	0.252824
10492428	NM_178892	Tiparp	TCDD-inducible poly(ADP-ribose) polymerase	1936.22	1401.67	382.26	8.45784	1.38137	0.136324	0.184506
10515700	NM_198170	Szt2	seizure threshold 2	337.51	244.353	33.2375	0.938909	1.38124	0.0397661	0.11041
10540727	NM_133930	Creld1	cysteine-rich with EGF-like domains 1	1387.95	1005.07	94.4598	102.221	1.38094	0.0466203	0.117824
10350733	NM_011267	Rgs16	regulator of G-protein signaling 16	306.618	222.067	120.847	2.7808	1.38074	0.349301	0.292498
10575160	NM_133957	Nfat5	nuclear factor of activated T-cells 5	1457.03	1055.34	159.206	33.2897	1.38062	0.0417001	0.112207
10447569	NM_001111017	Serac1	serine active site containing 1	276.063	199.966	28.9667	19.047	1.38055	0.0392546	0.110273
10341577	---			2288.3	1657.66	268.347	158.636	1.38044	0.0458689	0.117133
10561017	NM_008776	Pafah1b3	platelet-activating factor acetylhydrolase	1725.51	1250.07	126.698	147.434	1.38033	0.0655397	0.135999
10351504	---			268.071	194.248	65.355	102.667	1.38005	0.484457	0.349126
10341988	---			985.586	714.274	143.693	106.506	1.37984	0.0994655	0.160262
10515704	NM_198170	Szt2	seizure threshold 2	198.933	144.19	34.0561	17.7198	1.37965	0.101274	0.161767
10471067	NM_009116	Prrx2	paired related homeobox 2	151.124	109.549	7.19004	14.3177	1.37951	0.11227	0.169451
10516393	NM_153177	Eif2c4	eukaryotic translation initiation factor 2C	208.85	151.406	59.8071	11.3495	1.37941	0.234814	0.236614
10403462	NM_001081426	Dip2c	DIP2 disco-interacting protein 2 homolog C (Drosophila)	1368.83	992.394	90.0835	38.6074	1.37932	0.00920997	0.0647411
10515716	NM_198170	Szt2	seizure threshold 2	311.446	225.809	52.0924	22.5124	1.37925	0.0913896	0.155337
10358625	NM_001024720	Hmcn1	hemicentin 1	106.149	76.9753	10.593	1.71147	1.37901	0.0370363	0.108128
10441565	NM_011299	Rps6ka2	ribosomal protein S6 kinase	3575.65	2593	80.4088	60.3728	1.37896	0.000829452	0.0328448
10341422	---			568.76	412.583	166.364	122.721	1.37853	0.318773	0.278535
10339585	---			553.747	401.763	137.246	109.139	1.37829	0.271942	0.255224
10342212	---			163.317	118.511	51.9797	31.4453	1.37808	0.316537	0.277543
10554895	NM_145151	Crebzf	CREB	762.829	553.584	74.1086	11.0328	1.37798	0.0357851	0.106884
10491564	NM_172679	4932438A13Rik	RIKEN cDNA 4932438A13 gene	2323.9	1687.04	247.401	54.2478	1.3775	0.0394893	0.110419
10607330	BC137973	Fam120c	family with sequence similarity 120	266.696	193.625	56.4927	29.3659	1.37739	0.156011	0.196406
10460645	NM_022012	Map3k11	mitogen-activated protein kinase kinase kinase 11	656.956	477.283	55.413	29.0553	1.37645	0.0182665	0.0823672
10581355	NM_023182	Ctrl	chymotrypsin-like	123.607	89.8289	12.5683	2.54696	1.37603	0.0369133	0.107908
10418004	NM_018829	Ap3m1	adaptor-related protein complex 3	2839.15	2063.52	104.275	6.23666	1.37587	0.00576261	0.0550056
10451123	NM_022880	Slc29a1	solute carrier family 29 (nucleoside transporters)	1065.42	774.447	73.1445	20.4953	1.37572	0.0135651	0.0750506
10430519	NM_013767	Csnk1e	casein kinase 1	2875.86	2090.48	80.6557	34.9515	1.37569	0.000885552	0.0334591
10360848	NM_133684	Mosc2	MOCO sulphurase C-terminal domain containing 2	439.036	319.215	83.8079	12.4228	1.37536	0.127519	0.179612
10444830	NM_010394	H2-Q7	histocompatibility 2	986.038	717.08	61.8401	25.092	1.37507	0.00850471	0.0622946
10465342	NM_028454	Tm7sf2	transmembrane 7 superfamily member 2	2430.21	1767.51	169.111	190.544	1.37493	0.0556034	0.12675
10580516	XM_003085369	Gm6625	predicted gene 6625	761.076	553.548	80.88	83.418	1.37491	0.098644	0.160019
10579066	XM_003084772	Gm3365	predicted gene 3365	1008.69	733.67	22.9892	38.9326	1.37486	0.0287009	0.0974391
10442616	NM_024284	Hagh	hydroxyacyl glutathione hydrolase	3017.92	2195.56	106.271	180.423	1.37455	0.054291	0.125686
10340163	---			2059.91	1498.84	271.131	249.716	1.37433	0.117753	0.173257
10448081	NM_178615	Rgmb	RGM domain family	4256.67	3097.42	241.428	132.519	1.37426	0.00627665	0.056521
10569972	NM_026058	Lass4	LAG1 homolog	3599.77	2620.38	418.02	312.456	1.37376	0.0629819	0.133814
10339986	---			102.948	74.9493	4.12186	7.27295	1.37357	0.0713332	0.140681
10492006	NM_016984	Trpc4	transient receptor potential cation channel	346.561	252.329	42.0451	33.0368	1.37345	0.0756858	0.144094
10452556	NM_024448	Rab12	RAB12	751.257	547.038	137.634	0.213698	1.37332	0.123886	0.177193
10358635	NM_001024720	Hmcn1	hemicentin 1	146.302	106.532	25.0089	8.34755	1.37332	0.0975502	0.15927
10582378	NM_001037298	Fam38a	family with sequence similarity 38	223.11	162.462	24.7137	37.8991	1.37331	0.216211	0.22795
10491605	NM_172679	4932438A13Rik	RIKEN cDNA 4932438A13 gene	2442.31	1778.48	40.4617	68.5047	1.37326	0.0180553	0.0819859
10472764	NM_010064	Dync1i2	dynein cytoplasmic 1 intermediate chain 2	5184.71	3775.89	138.482	110.135	1.37311	0.00173462	0.0392258
10557628	NM_175163	Zfp689	zinc finger protein 689	442.318	322.144	39.5237	8.22253	1.37304	0.0282986	0.096798
10343460	---			327.477	238.512	44.6915	54.8152	1.373	0.203114	0.221082
10384956	NM_026527	Chac2	ChaC	1091.16	794.859	128.934	141.508	1.37277	0.135133	0.183909
10471036	NM_020329	Dolpp1	dolichyl pyrophosphate phosphatase 1	1664.28	1212.41	116.332	89.8159	1.3727	0.0198157	0.0851608
10563718	---			118.706	86.4937	6.7835	6.17877	1.37243	0.0196213	0.0849287
10338041	---			2600.74	1895.06	748.715	473.718	1.37237	0.288014	0.263437
10338793	---			101.478	73.9482	19.2973	23.192	1.37228	0.303489	0.271378
10484201	NM_001025576	Ccdc141	coiled-coil domain containing 141	3230.58	2354.31	410.084	82.6043	1.3722	0.0588207	0.130126
10580365	NM_025722	4921524J17Rik	RIKEN cDNA 4921524J17 gene	386.713	281.849	62.9619	47.0923	1.37206	0.129468	0.180812
10557326	NM_001008700	Il4ra	interleukin 4 receptor	1358.12	989.914	205.936	116.38	1.37196	0.0842381	0.150102
10450699	NM_001177467	H2-t9	MHC class Ib T9	389.687	284.063	25.3432	28.2002	1.37183	0.0478155	0.119053
10467907	NM_145502	Erlin1	ER lipid raft associated 1	456.525	332.796	44.6751	43.0265	1.37179	0.0734569	0.142361
10525489	ENSMUST00000100731	Setd1b	SET domain containing 1B	804.472	586.523	183.192	46.6083	1.3716	0.168089	0.202987
10572345	NM_001146153	Homer3	homer homolog 3 (Drosophila)	250.891	182.987	20.3408	30.6186	1.37109	0.139313	0.186188
10341653	---			106.545	77.7245	14.2782	2.07505	1.3708	0.0688536	0.138717
10485117	NM_011957	Creb3l1	cAMP responsive element binding protein 3-like 1	635.67	463.729	195.203	15.31	1.37078	0.266014	0.252244
10491617	NM_172679	4932438A13Rik	RIKEN cDNA 4932438A13 gene	1849.61	1349.47	101.658	7.56854	1.37062	0.0129431	0.0735388
10456237	NM_009182	St8sia3	ST8 alpha-N-acetyl-neuraminide alpha-2	2187.93	1596.45	56.9093	23.8561	1.3705	0.000768028	0.0343078
10431300	NM_001142357	Alg12	asparagine-linked glycosylation 12 homolog (yeast	1243.59	907.693	16.1676	40.2193	1.37005	0.0351676	0.106123
10367544	NM_001113470	Ctdsp2	CTD (carboxy-terminal domain	757.764	553.251	128.221	3.4152	1.36966	0.109697	0.167435
10433937	---			111.136	81.1622	17.2288	7.795	1.3693	0.0814995	0.14861
10375229	---			133.408	97.4454	38.6403	4.91833	1.36906	0.2466	0.242219
10393751	---			106.788	78.0195	8.5737	0.482254	1.36874	0.0278691	0.0962733
10384423	NM_172496	Cobl	cordon-bleu	1141.06	833.726	61.5428	65.2806	1.36863	0.0289351	0.0977584
10371188	NM_176954	Celf5	CUGBP	233.179	170.395	16.211	15.2619	1.36846	0.0343479	0.104977
10431371	NM_199198	Hdac10	histone deacetylase 10	438.716	320.653	30.7859	30.0629	1.36819	0.0389411	0.11004
10512739	NM_011728	Xpa	xeroderma pigmentosum	441.773	322.911	60.0037	32.4783	1.36809	0.0648621	0.135617
10511721	---			456.996	334.131	73.8353	90.8318	1.36771	0.258924	0.248457
10452538	NM_001114098	1110012J17Rik	RIKEN cDNA 1110012J17 gene	932.285	681.691	46.6666	76.8468	1.36761	0.0852473	0.150746
10607658	NM_178256	Reps2	RALBP1 associated Eps domain containing protein 2	1664.89	1217.49	136.255	29.1959	1.36748	0.0237799	0.0907941
10391488	NR_004414	Rnu2	U2 small nuclear RNA	1873.65	1370.19	933.973	160.202	1.36744	0.450677	0.33586
10478447	NM_021420	Stk4	serine	985.413	720.706	33.0204	8.48307	1.36729	0.0028189	0.0450031
10355530	NM_027884	Tns1	tensin 1	1500.21	1097.48	172.949	90.468	1.36696	0.0431032	0.11392
10358675	NM_001039511	Ivns1abp	influenza virus NS1A binding protein	599.695	438.718	143.636	47.8568	1.36692	0.184956	0.211792
10398350	NR_029770	Mir341	microRNA 341	645.183	472.047	71.6287	29.7892	1.36678	0.0378174	0.108693
10454807	NR_002905	Snora74a	small nucleolar RNA	108.851	79.6432	32.0962	15.3227	1.36674	0.269146	0.253808
10358656	NM_001024720	Hmcn1	hemicentin 1	145.073	106.176	10.3676	12.2196	1.36635	0.0677388	0.137911
10491607	NM_172679	4932438A13Rik	RIKEN cDNA 4932438A13 gene	1382.45	1011.93	116.195	31.0388	1.36614	0.0230997	0.0895546
10457225	NM_007746	Map3k8	mitogen-activated protein kinase kinase kinase 8	129.492	94.7947	21.4171	11.6508	1.36603	0.101925	0.161952
10340368	---			476.418	348.79	79.1643	49.7035	1.36592	0.114306	0.170678
10373814	NM_022889	Pes1	pescadillo homolog 1	829.316	607.294	16.768	25.6192	1.36559	0.0178225	0.0817058
10364814	NM_019575	Scamp4	secretory carrier membrane protein 4	1178.12	862.733	136.459	127.241	1.36557	0.0977825	0.159391
10551030	NM_001130150	Arhgef1	Rho guanine nucleotide exchange factor (GEF) 1	398.98	292.19	5.59075	26.9138	1.36548	0.104235	0.163671
10524983	NM_172424	Med13l	mediator complex subunit 13-like	789.02	577.833	86.9107	12.5904	1.36548	0.0483074	0.119003
10589955	NM_024222	Stt3b	STT3	428.87	314.157	68.3517	43.8877	1.36515	0.107391	0.165842
10544015	NM_011732	Ybx1	Y box protein 1	1071.7	785.189	97.9679	129	1.36489	0.130864	0.181838
10371379	NM_001004363	Nuak1	NUAK family	3439.86	2521.39	318.036	158.156	1.36427	0.0243886	0.0916518
10398354	---			1683.14	1233.79	263.166	335.391	1.36421	0.262498	0.250298
10580452	NM_009172	Siah1a	seven in absentia 1A	265.491	194.621	46.2265	15.7988	1.36414	0.104743	0.164213
10439138	NM_177357	Kalrn	kalirin	780.695	572.341	69.6485	25.3823	1.36404	0.0232447	0.0896949
10340250	---			107.854	79.0736	18.5751	5.34032	1.36397	0.104073	0.1637
10604906	NM_010498	Ids	iduronate 2-sulfatase	5911.37	4334.04	363.357	24.6394	1.36394	0.0167007	0.0798321
10577048	NR_030779	Ankrd10	ankyrin repeat domain 10	472.804	346.688	35.0646	40.1988	1.36377	0.0681099	0.13817
10569456	---			303.57	222.612	22.0833	57.4519	1.36367	0.274699	0.256563
10372130	NM_175128	4930430F08Rik	RIKEN cDNA 4930430F08 gene	1493.76	1095.54	54.8911	140.349	1.36349	0.128637	0.180235
10488697	NM_018807	Plagl2	pleiomorphic adenoma gene-like 2	231.257	169.626	65.7617	9.40756	1.36333	0.243954	0.240952
10340838	---			458.094	336.102	150.952	26.9658	1.36296	0.295094	0.267111
10606876	NM_019768	Morf4l2	mortality factor 4 like 2	1084.1	795.481	55.6216	23.2082	1.36283	0.00521211	0.0526905
10592050	NM_013800	Barx2	BarH-like homeobox 2	106.281	78.0008	13.9991	9.64388	1.36256	0.0778897	0.146112
10444589	NM_010479	Hspa1a	heat shock protein 1A	230.564	169.272	44.1722	25.0806	1.36209	0.143029	0.188488
10358670	NM_001024720	Hmcn1	hemicentin 1	113.251	83.1455	23.5725	12.9191	1.36209	0.163786	0.200596
10511923	NM_001034867	Pm20d2	peptidase M20 domain containing 2	138.073	101.383	1.90197	6.28055	1.36189	0.0627118	0.133679
10346747	NM_030013	Cyp20a1	cytochrome P450	822.56	604.04	82.439	91.7084	1.36176	0.109057	0.167274
10376461	NM_053168	Trim11	tripartite motif-containing 11	391.068	287.212	18.8035	33.2777	1.3616	0.0953011	0.158219
10343412	---			237.47	174.413	24.9857	39.5189	1.36154	0.21855	0.228926
10338603	---			212.943	156.401	33.3931	30.819	1.36153	0.168289	0.203093
10463242	NM_001141983	Golga7b	golgi autoantigen	1179.63	866.425	43.8134	61.5888	1.36149	0.0367307	0.107651
10527965	NM_022890	Cldn12	claudin 12	634.478	466.153	142.53	58.8783	1.3611	0.172358	0.205245
10565156	NM_011983	Homer2	homer homolog 2 (Drosophila)	875.089	642.991	28.8929	4.01924	1.36097	0.0042176	0.0497985
10484227	NM_175465	Sestd1	SEC14 and spectrin domains 1	1531.74	1125.59	134.622	88.9906	1.36083	0.0278178	0.0962058
10447617	NR_030465	Mir692-1	microRNA 692-1	696.649	512.018	53.6683	21.132	1.3606	0.0158831	0.0790492
10573295	NM_009055	Rfx1	regulatory factor X	347.736	255.589	18.5162	1.79188	1.36053	0.0122968	0.0720796
10525555	NM_133917	Mlxip	MLX interacting protein	803.802	590.802	127.263	13.0699	1.36053	0.0990331	0.16002
10519527	NM_011076	Abcb1a	ATP-binding cassette	109.409	80.4259	33.7617	10.7545	1.36037	0.27519	0.256836
10369688	NM_027384	Tet1	tet oncogene 1	101.747	74.8061	19.0517	3.87702	1.36014	0.127149	0.179313
10540509	NM_177328	Grm7	glutamate receptor	2174.12	1598.68	102.333	4.9104	1.35995	0.0101808	0.0674357
10503833	BC091747	Rplp1	ribosomal protein	1355.18	996.649	209.92	192.007	1.35974	0.163683	0.200632
10343902	---			218.799	160.954	43.1975	12.5681	1.35939	0.136275	0.184467
10491615	NM_172679	4932438A13Rik	RIKEN cDNA 4932438A13 gene	559.054	411.301	129.251	25.4925	1.35923	0.181126	0.210113
10515696	NM_198170	Szt2	seizure threshold 2	417.308	307.03	13.3446	8.05588	1.35917	0.00142014	0.0375446
10595793	NM_007502	Atp1b3	ATPase	6707.6	4935.43	217.836	278.819	1.35907	0.0216884	0.0877211
10595990	NM_028768	Armc8	armadillo repeat containing 8	1169.74	860.865	90.5033	1.2068	1.3588	0.0274179	0.0956251
10343955	---			292.236	215.085	74.1938	48.6195	1.3587	0.256074	0.247187
10354233	NM_001013025	Tgfbrap1	transforming growth factor	1086.99	800.026	82.2602	24.175	1.3587	0.0179129	0.0817894
10338804	---			850.365	625.982	70.9973	47.3338	1.35845	0.024984	0.0924716
10597493	NM_024222	Stt3b	STT3	4207.23	3097.11	217.614	1.31615	1.35844	0.0125643	0.0727076
10491611	NM_172679	4932438A13Rik	RIKEN cDNA 4932438A13 gene	1053.27	775.419	41.5178	33.1283	1.35833	0.00533877	0.0531999
10602765	NM_001081667	Klhl34	kelch-like 34 (Drosophila)	119.593	88.0481	6.14669	6.05919	1.35827	0.0214154	0.0872786
10339772	---			125.519	92.4118	32.3266	2.20288	1.35825	0.21742	0.228481
10389293	NM_145433	Mrm1	mitochondrial rRNA methyltransferase 1 homolog (S. cerevisiae)	487.58	359.005	71.8774	36.8792	1.35814	0.0797028	0.147349
10535247	NM_028833	Iqce	IQ motif containing E	295.978	217.945	28.1569	1.74135	1.35804	0.0400787	0.110904
10345580	NM_030266	Inpp4a	inositol polyphosphate-4-phosphatase	3210.79	2365.08	134.364	93.5417	1.35758	0.00416076	0.0493845
10364722	NM_007909	Efna2	ephrin A2	245.535	180.867	20.3542	16.6285	1.35755	0.0371418	0.108192
10530059	NM_172710	Sel1l3	sel-1 suppressor of lin-12-like 3 (C. elegans)	1056.55	778.309	80.5232	112.333	1.35749	0.114201	0.17069
10569886	NM_025701	Trappc5	trafficking protein particle complex 5	952.765	701.881	112.301	18.588	1.35745	0.0557742	0.12698
10526882	NM_001081265	Heatr2	HEAT repeat containing 2	475.36	350.293	65.2974	23.9219	1.35704	0.0655473	0.135983
10439249	NM_001039530	Parp14	poly (ADP-ribose) polymerase family	138.804	102.307	11.1141	6.03842	1.35673	0.0179829	0.0819443
10407803	NM_031999	Gpr137b	G protein-coupled receptor 137B	684.021	504.169	63.2574	115.191	1.35673	0.231588	0.235378
10394846	ENSMUST00000101568	LOC100043371	similar to development and differentiation enhancing factor 2	152.501	112.411	46.3366	15.4099	1.35664	0.273008	0.2558
10340770	---			178.091	131.307	31.1969	62.6235	1.3563	0.471254	0.344179
10515731	NM_198170	Szt2	seizure threshold 2	305.447	225.246	62.751	38.8524	1.35606	0.176359	0.207503
10486102	NM_201367	Gpr176	G protein-coupled receptor 176	701.082	517.062	48.2283	39.7377	1.3559	0.024506	0.0918647
10481804	NM_175211	Ralgps1	Ral GEF with PH domain and SH3 binding motif 1	640.534	472.568	26.9227	78.2391	1.35543	0.181238	0.210136
10506269	NM_001177602	Ak4	adenylate kinase 4	156.558	115.506	28.6909	18.7416	1.35541	0.149752	0.192562
10604763	NM_023142	Arpc1b	actin related protein 2	7288.94	5377.79	493.179	226.141	1.35538	0.0110665	0.0698334
10358607	NM_001024720	Hmcn1	hemicentin 1	113.408	83.692	17.8258	0.0744772	1.35507	0.101931	0.161932
10472034	NR_033304	Lypd6	LY6	472.341	348.578	54.6486	9.80096	1.35505	0.0535857	0.124882
10404354	NM_011296	Rps18	ribosomal protein S18	2134.04	1574.98	449.489	121.046	1.35496	0.155649	0.196194
10344134	---			1249.66	922.403	96.1252	47.5278	1.35479	0.0157224	0.078943
10368527	NM_025798	Hint3	histidine triad nucleotide binding protein 3	2113.19	1559.82	259.15	183.224	1.35476	0.0712697	0.140586
10381588	NM_008175	Grn	granulin	2006.63	1481.19	309.231	154.571	1.35475	0.0883272	0.152912
10352980	NM_027671	Sntg1	syntrophin	246.325	181.826	74.5762	23.6806	1.35473	0.272389	0.255458
10465424	NM_020253	Nrxn2	neurexin II	466.023	344.031	126.299	30.3847	1.35459	0.2322	0.235525
10380871	NM_021547	Stard3	START domain containing 3	628.668	464.131	37.0908	45.541	1.35451	0.0560819	0.127265
10533961	NM_203319	Dhx37	DEAH (Asp-Glu-Ala-His) box polypeptide 37	475.957	351.4	26.2574	41.5467	1.35446	0.0933843	0.156671
10491629	NM_172679	4932438A13Rik	RIKEN cDNA 4932438A13 gene	1857.25	1371.27	117.095	10.6534	1.3544	0.0178198	0.0817349
10545771	NM_175475	Cyp26b1	cytochrome P450	123.799	91.4136	5.75343	13.4829	1.35427	0.151204	0.193442
10427286	NM_008272	Hoxc9	homeobox C9	157.843	116.552	22.0687	4.46832	1.35427	0.076136	0.144647
10516219	ENSMUST00000097894	Gm10572	predicted gene 10572	164.882	121.76	5.70052	2.97655	1.35416	0.00165359	0.0386462
10408879	NM_001033399	Gfod1	glucose-fructose oxidoreductase domain containing 1	1024	756.463	130.366	4.60822	1.35367	0.0705729	0.140095
10366767	NM_146012	Ctdsp2	CTD (carboxy-terminal domain	274.467	202.782	71.5637	24.6171	1.35351	0.22145	0.230553
10515688	NM_198170	Szt2	seizure threshold 2	332.875	245.945	39.3557	15.8714	1.35346	0.0470012	0.118194
10577492	NM_001162947	Nek3	NIMA (never in mitosis gene a)-related expressed kinase 3	333.719	246.603	40.5245	22.6415	1.35327	0.0545065	0.125991
10429341	NM_007982	Ptk2	PTK2 protein tyrosine kinase 2	655.093	484.127	22.3758	9.14278	1.35314	0.00184931	0.0396443
10340280	---			100.41	74.2128	22.243	24.7404	1.35301	0.347306	0.291582
10397912	NM_001081017	Unc79	unc-79 homolog (C. elegans)	379.814	280.768	28.0174	29.7842	1.35277	0.0579111	0.128995
10356267	BC094285	A530032D15Rik	RIKEN cDNA A530032D15Rik gene	434.812	321.509	81.8867	30.8235	1.35241	0.12779	0.179742
10583586	NM_152808	Slc44a2	solute carrier family 44	2930.63	2167.29	375.614	189.39	1.35221	0.0589878	0.130337
10490794	NM_008862	Pkia	protein kinase inhibitor	2081.78	1539.92	160.035	57.0993	1.35187	0.0173144	0.081015
10353549	NM_026604	Fam135a	family with sequence similarity 135	709.359	524.833	108.192	72.3886	1.35159	0.108309	0.166607
10412882	NM_009380	Thrb	thyroid hormone receptor beta	171.16	126.637	37.0164	0.184201	1.35158	0.172621	0.205342
10489204	NM_009373	Tgm2	transglutaminase 2	123.106	91.084	16.7659	9.90883	1.35156	0.0751055	0.143713
10461671	NM_172635	Patl1	protein associated with topoisomerase II homolog 1 (yeast)	604.039	446.988	77.69	8.93046	1.35135	0.0700974	0.139733
10503359	NM_198957	C430048L16Rik	RIKEN cDNA C430048L16 gene	110.643	81.8868	41.6204	11.7166	1.35117	0.356957	0.295903
10599120	NM_001009947	Dock11	dedicator of cytokinesis 11	4174.64	3090.31	170.537	57.2118	1.35088	0.00372568	0.0479212
10387372	NM_001017426	Kdm6b	KDM1 lysine (K)-specific demethylase 6B	475.98	352.389	113.561	20.9863	1.35072	0.195804	0.217193
10342980	---			137.586	101.89	61.0882	29.2106	1.35033	0.448348	0.33506
10403455	NM_001081426	Dip2c	DIP2 disco-interacting protein 2 homolog C (Drosophila)	2980.51	2207.28	142.877	124.646	1.35031	0.0124668	0.0725138
10534551	NM_027891	Lrwd1	leucine-rich repeats and WD repeat domain containing 1	309.804	229.457	28.8129	3.08519	1.35016	0.0383247	0.109251
10549748	NM_025324	Zfp524	zinc finger protein 524	822.426	609.173	67.626	58.8483	1.35007	0.0439537	0.114697
10343169	---			191.695	142.015	27.3456	4.1615	1.34983	0.0833288	0.149481
10385533	NM_011579	Tgtp1	T-cell specific GTPase 1	156.657	116.09	66.1217	30.3902	1.34945	0.425126	0.325595
10572679	NM_146211	Glt25d1	glycosyltransferase 25 domain containing 1	1404.52	1040.85	83.3779	73.9825	1.34939	0.0220274	0.0881096
10495136	NM_023186	Chia	chitinase	581.999	431.407	54.0136	18.375	1.34907	0.0282806	0.096773
10406205	NM_030711	Erap1	endoplasmic reticulum aminopeptidase 1	178.446	132.278	25.4408	11.4325	1.34902	0.0741449	0.142931
10532709	---			557.459	413.313	198.314	127.858	1.34876	0.396733	0.313815
10585509	NM_028049	Fbxo22	F-box protein 22	2594.28	1925.21	235.095	1.54911	1.34753	0.0387694	0.109794
10539669	NM_013458	Add2	adducin 2 (beta)	2344.64	1740.13	67.5666	30.7823	1.3474	0.00107165	0.034706
10504424	NM_016678	Reck	reversion-inducing-cysteine-rich protein with kazal motifs	295.302	219.187	35.0684	35.7815	1.34726	0.130068	0.18126
10603362	NM_207202	Ccdc120	coiled-coil domain containing 120	314.106	233.195	19.6027	15.1607	1.34697	0.0170528	0.0806232
10414081	NM_181529	Syt15	synaptotagmin XV	218.081	161.913	25.8497	0.651831	1.3469	0.0637745	0.134459
10515735	NM_198170	Szt2	seizure threshold 2	437.533	324.849	41.002	38.5603	1.34688	0.0707099	0.140091
10354529	BC048645	1700019D03Rik	RIKEN cDNA 1700019D03 gene	816.973	606.626	49.8585	31.1342	1.34675	0.0103396	0.0676967
10339928	---			3927.6	2916.36	318.685	100.93	1.34675	0.0215068	0.0873369
10358609	NM_001024720	Hmcn1	hemicentin 1	125.919	93.5225	18.1425	9.87068	1.3464	0.0824723	0.149154
10340537	---			1374.77	1021.08	174.404	353.078	1.3464	0.370434	0.301372
10450145	NM_013585	Psmb9	proteasome (prosome	274.023	203.599	17.593	24.6571	1.34589	0.0921741	0.155649
10558921	NR_028142	Pnpla2	patatin-like phospholipase domain containing 2	724.997	538.827	38.8201	7.03344	1.34551	0.0113006	0.0701875
10353947	NM_018872	Tmem131	transmembrane protein 131	2347.57	1745.04	94.0589	35.975	1.34528	0.00318568	0.0464433
10465185	NM_001114597	Ehbp1l1	EH domain binding protein 1-like 1	162.029	120.46	6.55317	3.47736	1.34508	0.0027708	0.0447075
10600936	NM_010110	Efnb1	ephrin B1	405.223	301.308	61.8469	0.0249296	1.34488	0.100577	0.161221
10395074	NM_001093775	Myt1l	myelin transcription factor 1-like	1397.63	1039.54	107.54	43.6856	1.34446	0.0170611	0.0806202
10594636	NM_025800	Ppp1r2	protein phosphatase 1	5373.57	3997.24	355.678	58.268	1.34432	0.0184091	0.0822738
10584071	NM_001080817	Prdm10	PR domain containing 10	360.46	268.155	14.7819	34.2191	1.34422	0.131497	0.182214
10353849	BC132293	4632411B12Rik	RIKEN cDNA 4632411B12 gene	1224.47	910.927	74.8487	38.4475	1.34421	0.00896755	0.0641307
10581181	NM_001033161	Tradd	TNFRSF1A-associated via death domain	365.919	272.274	46.2324	37.1958	1.34394	0.0974192	0.159228
10341687	---			111.156	82.7261	33.9158	15.6248	1.34366	0.298399	0.26884
10607259	NM_001002272	Tro	trophinin	1680.05	1250.37	32.612	23.4325	1.34364	0.000566272	0.0361617
10547227	NM_001080780	Ret	ret proto-oncogene	8004.58	5957.94	553.373	236.462	1.34352	0.0127595	0.0729986
10470614	NM_001033874	1190002A17Rik	RIKEN cDNA 1190002A17 gene	545.751	406.22	92.8327	20.0106	1.34348	0.11355	0.170503
10427235	NM_025385	Prr13	proline rich 13	2922.07	2175.01	377.359	60.8335	1.34347	0.0705684	0.140117
10488147	NM_001172160	Flrt3	fibronectin leucine rich transmembrane protein 3	918.405	683.787	189.263	173.9	1.34312	0.268283	0.25331
10515733	NM_198170	Szt2	seizure threshold 2	467.42	348.044	47.6153	68.5084	1.34299	0.190655	0.214419
10508805	NM_153423	Wasf2	WAS protein family	829.762	617.856	58.916	18.462	1.34297	0.0160678	0.0791865
10339195	---			120.643	89.8454	20.8519	7.36766	1.34278	0.112572	0.169625
10391870	NM_016896	Map3k14	mitogen-activated protein kinase kinase kinase 14	129.794	96.6768	5.3754	11.9987	1.34255	0.126097	0.178832
10338533	---			150.453	112.069	34.8969	0.767654	1.3425	0.196973	0.217849
10451860	NM_028370	Pot1b	protection of telomeres 1B	193.112	143.877	23.3432	24.2568	1.3422	0.141141	0.187198
10443764	NM_153062	Slc37a1	solute carrier family 37 (glycerol-3-phosphate transporter)	880.336	655.926	72.6826	62.3834	1.34213	0.0445817	0.115472
10340617	---			239.998	178.82	19.0541	20.0452	1.34212	0.0678514	0.137954
10404051	NM_175654	Hist1h4d	histone cluster 1	4870.25	3629.24	1110.04	186.627	1.34195	0.188531	0.21346
10579765	---			1563.48	1165.57	316.534	250.646	1.34139	0.225109	0.232387
10444244	NM_013683	Tap1	transporter 1	234.558	174.883	31.4188	6.4365	1.34122	0.0738341	0.142604
10425302	NM_013818	Gtpbp1	GTP binding protein 1	710.842	530.003	62.7234	4.47634	1.34121	0.0369594	0.107938
10533751	NM_011256	Pitpnm2	phosphatidylinositol transfer protein	3081.61	2297.67	169.897	3.16451	1.34119	0.0152596	0.0783102
10460359	NM_011778	Coro1b	coronin	2946.89	2197.34	17.3602	160.831	1.34112	0.0937125	0.156874
10579406	NM_027560	Arrdc2	arrestin domain containing 2	181.152	135.083	16.5162	7.57723	1.34104	0.0263707	0.0945923
10385557	NM_212484	Cnot6	CCR4-NOT transcription complex	793.187	591.49	46.1028	86.264	1.341	0.143297	0.188676
10341615	---			167.307	124.787	43.4742	12.9209	1.34074	0.228194	0.234027
10510908	---			210.087	156.709	17.2057	51.9054	1.34062	0.371403	0.301781
10458033	NM_133774	Stard4	StAR-related lipid transfer (START) domain containing 4	975.254	727.469	110.541	11.145	1.34061	0.0583808	0.129595
10557631	NM_145589	Prr14	proline rich 14	1110.21	828.167	109.075	22.5916	1.34057	0.0397415	0.110477
10344509	---			163.791	122.191	34.6538	16.1234	1.34046	0.171783	0.205099
10581996	NM_029441	Cdyl2	chromodomain protein	662.949	494.709	74.7013	58.9186	1.34008	0.0753852	0.143914
10554475	NM_178707	Zfp592	zinc finger protein 592	853.005	636.746	111.401	104.26	1.33963	0.135926	0.184325
10492229	NM_016738	Rpl13	ribosomal protein L13	121.149	90.4365	16.7242	4.29221	1.3396	0.0758896	0.14424
10364718	BC146018	1600002K03Rik	RIKEN cDNA 1600002K03 gene	164.78	123.007	24.2449	8.24591	1.3396	0.0827523	0.149184
10443949	NM_172619	Adamts10	a disintegrin-like and metallopeptidase (reprolysin type) with thrombospondin type 1 motif	162.963	121.652	7.0166	6.0165	1.33958	0.00954924	0.0655011
10582376	NM_001037298	Fam38a	family with sequence similarity 38	250.66	187.123	10.3702	29.9896	1.33955	0.18362	0.211195
10365658	NM_029166	Uhrf1bp1l	UHRF1 (ICBP90) binding protein 1-like	2861.49	2136.42	124.479	33.3693	1.33938	0.00573555	0.0549788
10578829	NM_001081390	Palld	palladin	213.075	159.116	18.4125	2.24387	1.33912	0.0342789	0.104872
10566574	NM_029000	Gvin1	GTPase	117.321	87.6182	18.8015	15.8897	1.339	0.167281	0.202551
10376326	NM_019440	Irgm2	immunity-related GTPase family M member 2	612.189	457.206	124.551	6.92233	1.33898	0.16334	0.20051
10394344	NR_033599	Gm6682	predicted gene 6682	1583.55	1182.85	465.379	113.387	1.33876	0.272148	0.255338
10340556	---			102.349	76.4607	28.4809	3.10089	1.33859	0.254861	0.246541
10399657	---			1198.26	895.274	253.453	227.17	1.33843	0.274561	0.256487
10343465	---			208.283	155.622	66.0692	29.7308	1.33839	0.316742	0.27767
10592942	NM_001081049	Mll1	myeloid	1205.05	900.378	75.8468	48.7757	1.33839	0.012385	0.0722699
10549758	NM_001039532	Zfp784	zinc finger protein 784	142.436	106.463	7.49721	6.45778	1.3379	0.0160048	0.0790478
10548661	---			1514.43	1132.05	362.816	282.454	1.33778	0.285696	0.262428
10594988	NM_015806	Mapk6	mitogen-activated protein kinase 6	883.361	660.368	79.5925	55.7609	1.33768	0.0368656	0.107838
10502050	NM_027808	Alpk1	alpha-kinase 1	139.688	104.435	16.7439	13.0945	1.33755	0.085836	0.151255
10516658	NM_025455	Ccdc28b	coiled coil domain containing 28B	211.055	157.8	14.7319	1.9803	1.33749	0.0221967	0.0885133
10593293	NM_001081445	Ncam1	neural cell adhesion molecule 1	4034.01	3016.56	190.914	312.488	1.33729	0.0850472	0.150568
10489660	NM_207706	Elmo2	engulfment and cell motility 2	2213.77	1655.44	115.063	83.7181	1.33727	0.00952884	0.0655596
10607602	NM_011147	Ppef1	protein phosphatase with EF hand calcium-binding domain 1	4007.39	2997.19	152.436	150.527	1.33705	0.0122625	0.072112
10517373	NM_022980	Rcan3	regulator of calcineurin 3	1598.97	1196.02	110.695	12.7887	1.33691	0.022459	0.0886628
10359446	NM_172645	AI848100	expressed sequence AI848100	1064.6	796.389	124.012	34.9825	1.33678	0.0531091	0.124475
10388902	NM_010708	Lgals9	lectin	3772.52	2822.28	486.281	100.746	1.33669	0.0697491	0.139314
10571111	NM_001101502	Zfp703	zinc finger protein 703	471.545	352.832	11.7476	1.63479	1.33646	0.00260436	0.0438965
10434869	NM_026202	Ccdc50	coiled-coil domain containing 50	1268.86	949.424	70.4085	43.5793	1.33646	0.00832795	0.061748
10421683	NM_008503	Rps2	ribosomal protein S2	458.025	342.744	24.5458	20.3366	1.33635	0.0149492	0.0777292
10567964	NM_001146311	Cln3	ceroid lipofuscinosis	746.635	558.744	51.0634	4.95252	1.33627	0.0224763	0.0886924
10534152	NM_145218	Wbscr17	Williams-Beuren syndrome chromosome region 17 homolog (human)	2310.54	1729.12	77.3573	114.668	1.33625	0.0395904	0.110361
10411958	NM_027934	Rnf180	ring finger protein 180	830.209	621.494	39.6935	11.1397	1.33583	0.00702893	0.058315
10491625	NM_172679	4932438A13Rik	RIKEN cDNA 4932438A13 gene	3475.12	2601.73	133.343	6.52765	1.3357	0.00751271	0.0593426
10344200	---			104.137	77.9717	33.1434	9.92844	1.33558	0.30588	0.27244
10505000	NM_025623	Nipsnap3b	nipsnap homolog 3B (C. elegans)	775.437	580.607	92.3072	73.0161	1.33556	0.0870011	0.152067
10404848	NM_021878	Jarid2	jumonji	688.315	515.424	38.1852	29.3025	1.33544	0.0131601	0.0738008
10458534	NM_029357	Pcdh1	protocadherin 1	116.368	87.1422	10.1585	4.75397	1.33538	0.0243783	0.0916889
10460255	AK081788	1700055N04Rik	RIKEN cDNA 1700055N04 gene	742.087	555.852	177.651	101.275	1.33504	0.23331	0.23599
10542764	NM_172309	Arntl2	aryl hydrocarbon receptor nuclear translocator-like 2	230.295	172.504	15.7688	30.5808	1.33502	0.188366	0.213433
10383545	NM_001080932	Foxk2	forkhead box K2	1096.93	821.665	41.7724	41.3879	1.33501	0.01258	0.0727524
10448557	NR_033554	D330041H03Rik	RIKEN cDNA D330041H03 gene	172.381	129.148	20.6253	1.42604	1.33476	0.0671975	0.137395
10510509	NM_177366	Gpr157	G protein-coupled receptor 157	251.879	188.729	18.2179	22.1645	1.33461	0.084009	0.149959
10560139	NM_001039146	Vmn1r90	vomeronasal 1 receptor 90	289.103	216.636	78.1457	71.978	1.33451	0.380719	0.306359
10592154	NM_029762	Hyls1	hydrolethalus syndrome 1	279.632	209.611	40.9364	14.0854	1.33405	0.0839139	0.149967
10520753	NM_027221	Krtcap3	keratinocyte associated protein 3	131.958	98.9154	9.04243	7.71765	1.33405	0.0298425	0.0991977
10341223	---			316.339	237.137	35.7556	28.2331	1.33399	0.0782849	0.146399
10601152	NM_172932	Nlgn3	neuroligin 3	2358.69	1768.29	234.039	52.5855	1.33388	0.0409055	0.111391
10590306	NM_178676	Entpd3	ectonucleoside triphosphate diphosphohydrolase 3	3616.83	2711.9	180.733	98.4065	1.33369	0.00554268	0.0541023
10452356	NM_030084	Gpr108	G protein-coupled receptor 108	1096.59	822.279	36.7648	25.8617	1.3336	0.00265048	0.0441001
10491623	NM_172679	4932438A13Rik	RIKEN cDNA 4932438A13 gene	3027.65	2270.68	89.3218	158.998	1.33337	0.0535136	0.124842
10408850	NM_001111324	Nedd9	neural precursor cell expressed	537.409	403.063	85.5509	8.47725	1.33331	0.110718	0.168257
10341087	---			541.719	406.309	84.3612	27.0238	1.33327	0.0960913	0.158804
10582275	NM_011404	Slc7a5	solute carrier family 7 (cationic amino acid transporter	1878.65	1409.15	269.493	114.912	1.33318	0.0805402	0.147902
10343008	---			114.735	86.0622	22.1043	9.19074	1.33316	0.145697	0.190098
10444890	NM_133662	Ier3	immediate early response 3	384.751	288.615	67.7284	12.5965	1.33309	0.127201	0.179331
10425695	NM_033218	Srebf2	sterol regulatory element binding factor 2	3098.76	2324.79	125.276	9.43832	1.33292	0.00819993	0.0613001
10340507	---			129.139	96.8844	16.6149	37.1713	1.33292	0.421025	0.323657
10605788	NR_003292	Zxda	zinc finger	434.86	326.257	33.6835	27.3087	1.33288	0.0352387	0.106232
10443319	NM_027185	Def6	differentially expressed in FDCP 6	483.44	362.745	83.9918	26.4424	1.33273	0.11918	0.174255
10587942	NM_011916	Xrn1	5'-3' exoribonuclease 1	376.565	282.566	56.4472	11.0193	1.33266	0.0952309	0.158218
10512774	NM_178893	Coro2a	coronin	3543.73	2659.24	81.7585	51.3514	1.33261	0.000686398	0.0341992
10463789	NM_021360	Neurl1a	neuralized homolog 1A (Drosophila)	430.496	323.092	41.343	10.2859	1.33242	0.0372598	0.108223
10515708	NM_198170	Szt2	seizure threshold 2	255.993	192.181	43.9679	6.71354	1.33204	0.124091	0.177345
10416423	NM_198642	5031414D18Rik	RIKEN cDNA 5031414D18 gene	111.369	83.6089	18.5915	6.33675	1.33202	0.110317	0.167929
10518372	NM_001025365	Miip	migration and invasion inhibitory protein	260.172	195.326	22.0824	3.65659	1.33199	0.0323726	0.102319
10370422	NM_029546	Pwp2	PWP2 periodic tryptophan protein homolog (yeast)	478.733	359.415	32.165	11.5374	1.33198	0.0137604	0.0755779
10492049	NM_019995	Fam48a	family with sequence similarity 48	883.649	663.426	82.5101	2.83016	1.33195	0.0435244	0.114168
10578904	NM_013494	Cpe	carboxypeptidase E	4861.44	3650.68	5.39638	126.875	1.33165	0.0468408	0.11802
10577641	NM_026931	1810011O10Rik	RIKEN cDNA 1810011O10 gene	111.06	83.4054	24.7414	12.4779	1.33157	0.199423	0.219223
10340106	---			540.017	405.577	76.6713	15.4213	1.33148	0.0861947	0.151534
10340443	---			215.447	161.823	66.0327	3.71152	1.33138	0.29457	0.266956
10349980	NM_016749	Mybph	myosin binding protein H	197.058	148.017	43.3316	30.3832	1.33132	0.236955	0.237531
10377605	BC117077	1810027O10Rik	RIKEN cDNA 1810027O10 gene	362.937	272.634	83.1754	51.705	1.33122	0.231947	0.235479
10534842	NM_010312	Gnb2	guanine nucleotide binding protein (G protein)	3907.96	2936.26	149.804	260.536	1.33093	0.0736665	0.142493
10550715	NM_025960	Trappc6a	trafficking protein particle complex 6A	559.068	420.107	56.6115	26.9698	1.33077	0.0366152	0.107731
10478374	NM_144891	Gdap1l1	ganglioside-induced differentiation-associated protein 1-like 1	2693.4	2024.1	100.249	128.291	1.33066	0.0307988	0.100389
10470564	NM_001145835	Ralgds	ral guanine nucleotide dissociation stimulator	1131.9	850.659	34.7028	111.261	1.33062	0.155456	0.19617
10547769	NM_013545	Ptpn6	protein tyrosine phosphatase	103.009	77.4265	2.13959	11.8045	1.33041	0.19429	0.21628
10339947	---			222.702	167.397	53.9402	67.6579	1.33038	0.441344	0.332263
10526897	NM_024451	Sun1	Sad1 and UNC84 domain containing 1	1117.62	840.258	46.5595	37.2168	1.33009	0.00728157	0.0589547
10425999	NM_001033337	Ttc38	tetratricopeptide repeat domain 38	459.368	345.386	68.422	9.38207	1.33001	0.0982853	0.159923
10407173	NM_010560	Il6st	interleukin 6 signal transducer	6912.9	5198.16	360.95	124.352	1.32988	0.00759872	0.0597099
10344423	---			104.051	78.2517	22.6807	3.74989	1.3297	0.183704	0.211265
10554370	NM_175433	Zfp710	zinc finger protein 710	404.691	304.435	27.9558	8.43194	1.32932	0.0165442	0.0795034
10592023	NM_001102455	Aplp2	amyloid beta (A4) precursor-like protein 2	6877.57	5173.93	99.1469	202.142	1.32927	0.0285714	0.0972179
10399588	ENSMUST00000079237	Zfp125	zinc finger protein 125	310.233	233.46	56.0283	49.9891	1.32885	0.225092	0.232422
10498307	---			395.394	297.553	50.5187	12.8624	1.32882	0.0683217	0.138383
10355532	NM_027884	Tns1	tensin 1	1163.93	875.97	165.009	21.9432	1.32873	0.0906578	0.154847
10533529	NM_145358	Camkk2	calcium	436.161	328.349	30.2926	46.8336	1.32835	0.133923	0.18328
10410007	NM_019395	Fbp1	fructose bisphosphatase 1	173.58	130.688	22.0286	27.4943	1.3282	0.214985	0.227319
10340849	---			1469.68	1106.55	129.982	90.4009	1.32816	0.0366763	0.107666
10362538	NM_010681	Lama4	laminin	428.978	322.986	71.9716	49.9864	1.32816	0.150371	0.192948
10597074	---			339.48	255.697	41.8146	8.12992	1.32766	0.0671428	0.137314
10458547	NM_011937	Gnpda1	glucosamine-6-phosphate deaminase 1	610.749	460.031	41.6161	59.4333	1.32763	0.111716	0.168925
10516371	NM_153403	Eif2c1	eukaryotic translation initiation factor 2C	523.755	394.508	47.7616	59.3438	1.32762	0.131698	0.182243
10526783	NM_001013773	BC055004	cDNA sequence BC055004	123.532	93.0498	3.87745	7.30915	1.32759	0.0675203	0.137621
10358589	NM_001024720	Hmcn1	hemicentin 1	254.921	192.055	18.7634	16.2507	1.32734	0.037882	0.108741
10338317	---			671.58	505.967	38.9585	46.2509	1.32732	0.0552022	0.126631
10389099	NM_011235	Rad51l3	RAD51-like 3 (S. cerevisiae)	570.665	429.945	19.0212	36.824	1.3273	0.0773946	0.145725
10541532	NM_021899	Foxj2	forkhead box J2	966.921	728.496	96.6122	41.4355	1.32728	0.0358746	0.10701
10349383	NM_028787	Slc35f5	solute carrier family 35	1756.34	1323.3	220.623	7.40089	1.32724	0.0764566	0.144801
10502830	NM_199465	Nexn	nexilin	257.86	194.289	35.281	18.4743	1.3272	0.0791682	0.14702
10433702	NM_033564	Mpv17l	Mpv17 transgene	818.231	616.518	77.2306	68.3075	1.32718	0.068653	0.138436
10340003	---			263.235	198.342	93.4435	37.0178	1.32718	0.364887	0.299195
10392183	NM_023913	Ern1	endoplasmic reticulum (ER) to nucleus signalling 1	355.569	267.952	44.773	31.2129	1.32699	0.084846	0.150358
10490894	NM_007892	E2f5	E2F transcription factor 5	269.565	203.16	21.01	17.6839	1.32686	0.0403446	0.110997
10339524	---			110.805	83.5099	36.1944	24.9894	1.32685	0.394168	0.31296
10540072	NM_025800	Ppp1r2	protein phosphatase 1	7014.36	5286.57	543.696	360.624	1.32683	0.0244272	0.091721
10516859	NM_145393	Ythdf2	YTH domain family 2	897.864	676.82	70.9854	7.99228	1.32659	0.0307236	0.100397
10569069	NM_029767	Rps9	ribosomal protein S9	2097.4	1581.18	401.92	19.3036	1.32647	0.15564	0.196211
10366698	BC065058	BC048403	cDNA sequence BC048403	587.546	442.96	87.94	17.5866	1.32641	0.0972218	0.159192
10533875	NM_011424	Ncor2	nuclear receptor co-repressor 2	1047.37	789.644	136.233	21.9932	1.32638	0.0768396	0.145072
10462973	NM_008234	Hells	helicase	144.538	108.977	12.904	16.0584	1.32632	0.12839	0.180083
10391146	NM_134037	Acly	ATP citrate lyase	4271.15	3220.71	165.032	65.0811	1.32615	0.00314466	0.0462919
10376690	NM_008502	Llgl1	lethal giant larvae homolog 1 (Drosophila)	337.249	254.308	35.1865	29.9266	1.32614	0.0786016	0.146477
10464877	NM_133803	Dpp3	dipeptidylpeptidase 3	1598.38	1205.41	102.954	164.175	1.32601	0.128849	0.180365
10445729	NM_011549	Tcfeb	transcription factor EB	214.695	161.92	5.77864	0.727635	1.32593	0.0033427	0.046348
10341845	---			1000.95	754.92	179.68	89.1316	1.32591	0.137415	0.185208
10343512	---			313.391	236.385	44.2082	5.91175	1.32577	0.090922	0.155036
10341121	---			131.666	99.3297	47.7099	34.4227	1.32554	0.446719	0.334532
10404045	NM_178188	Hist1h2ad	histone cluster 1	207.205	156.327	8.18895	34.7835	1.32546	0.277474	0.258039
10527009	NM_021528	Chst12	carbohydrate sulfotransferase 12	1731.45	1306.49	90.268	23.9882	1.32527	0.00949815	0.0654477
10563116	NM_013520	Flt3l	FMS-like tyrosine kinase 3 ligand	218.255	164.687	9.31575	9.44558	1.32527	0.0184614	0.0823451
10338235	---			102.108	77.0673	34.1092	3.38838	1.32492	0.331014	0.284407
10375027	---			268.717	202.819	49.1313	3.50641	1.32491	0.144813	0.189599
10460312	NM_026373	Cdk2ap2	CDK2-associated protein 2	1213.8	916.198	199.657	28.291	1.32482	0.119085	0.174283
10433331	NM_025839	Nudt16l1	nudix (nucleoside diphosphate linked moiety X)-type motif 16-like 1	801.094	604.796	25.9529	47.7677	1.32457	0.0675419	0.137634
10416923	---			135.201	102.073	53.9565	13.5635	1.32455	0.402314	0.315833
10339504	---			114.489	86.4594	37.8618	11.4069	1.32419	0.33085	0.284294
10516908	NR_028512	Snora73a	small nucleolar RNA	645.2	487.278	148.865	74.7962	1.32409	0.216958	0.22834
10408243	NM_178192	Hist1h4a	histone cluster 1	3356.05	2534.72	835.71	16.3976	1.32403	0.230766	0.234963
10406407	NM_001042591	Arrdc3	arrestin domain containing 3	632.612	477.855	21.6847	58.1616	1.32386	0.140505	0.186846
10375123	ENSMUST00000101381	C530030P08Rik	RIKEN cDNA C530030P08 gene	1898.41	1434.12	571.262	7.71745	1.32374	0.294516	0.26696
10368886	ENSMUST00000105502	Foxo3	forkhead box O3	1874.9	1416.62	356.888	34.1891	1.3235	0.154427	0.195606
10368222	NM_053264	4930444G20Rik	RIKEN cDNA 4930444G20 gene	127.157	96.0877	26.3488	26.3534	1.32334	0.312233	0.275368
10409014	---			322.235	243.523	81.8316	20.8975	1.32322	0.233529	0.236159
10546292	ENSMUST00000095268	Gm9104	predicted gene 9104	911.237	688.716	344.204	53.109	1.3231	0.379496	0.305727
10470584	NM_022887	Tsc1	tuberous sclerosis 1	932.788	705.034	57.9552	36.0994	1.32304	0.0125462	0.0726957
10495993	NM_130450	Elovl6	ELOVL family member 6	4163.71	3147.18	585.314	281.421	1.323	0.0830639	0.149331
10491136	NM_026910	Tnik	TRAF2 and NCK interacting kinase	836.757	632.491	135.886	97.3914	1.32296	0.149585	0.192484
10367033	NM_198035	Zbtb39	zinc finger and BTB domain containing 39	256.662	194.02	17.1987	7.68481	1.32286	0.0131342	0.0738841
10478291	NM_026499	Srsf6	serine	1237.33	935.359	52.9504	111.464	1.32284	0.125725	0.178443
10564451	NM_001033713	Mef2a	myocyte enhancer factor 2A	4090.62	3094.28	237.736	206.265	1.32199	0.0226252	0.088893
10507529	NM_020000	Med8	mediator of RNA polymerase II transcription	336.431	254.51	44.5155	28.245	1.32188	0.0871197	0.152187
10582694	NM_001081120	Fam89a	family with sequence similarity 89	1503.51	1137.47	44.4622	41.0379	1.3218	0.00564017	0.0547591
10481401	NM_178694	Zer1	zer-1 homolog (C. elegans)	681.044	515.251	64.8562	22.0208	1.32177	0.0346755	0.105481
10461038	NM_134147	Macrod1	MACRO domain containing 1	286.464	216.739	22.6433	25.7043	1.3217	0.0877842	0.152583
10341767	---			179.374	135.726	64.5788	21.6526	1.32159	0.369415	0.300921
10480314	---			136.22	103.089	15.7404	22.5477	1.32138	0.237219	0.237717
10558961	NM_053082	Tspan4	tetraspanin 4	1127.32	853.521	181.933	37.0657	1.32079	0.113912	0.170707
10560298	---			111.077	84.1042	30.559	6.33917	1.32071	0.263335	0.250726
10494174	NM_011351	Sema6c	sema domain	288.776	218.689	62.3607	12.58	1.32048	0.185831	0.212284
10482762	NM_145360	Idi1	isopentenyl-diphosphate delta isomerase	2760.08	2090.67	97.6789	11.4971	1.32019	0.00617677	0.0558992
10405236	NM_027324	Sfxn1	sideroflexin 1	1505.17	1140.2	85.8158	90.5638	1.32008	0.0394212	0.110297
10365123	ENSMUST00000144647	Dohh	deoxyhypusine hydroxylase	232.254	175.944	3.47658	14.2461	1.32004	0.101801	0.161896
10391755	NM_025918	Ccdc43	coiled-coil domain containing 43	710.915	538.56	112.176	41.2496	1.32003	0.104078	0.163681
10499643	NM_009602	Chrnb2	cholinergic receptor	2383.16	1805.64	20.5697	66.3477	1.31984	0.0397332	0.110488
10495042	NM_027982	Ppm1j	protein phosphatase 1J	2739.28	2075.96	306.611	27.5671	1.31953	0.062773	0.133652
10400762	NM_201519	Map4k5	mitogen-activated protein kinase kinase kinase kinase 5	1289.94	977.626	81.6458	76.4198	1.31946	0.0347128	0.105559
10383010	U72673	Socs3	suppressor of cytokine signaling 3	244.18	185.066	84.6114	1.89215	1.31942	0.349836	0.292757
10353167	NM_028173	Tram1	translocating chain-associating membrane protein 1	2167.62	1642.91	118.091	102.166	1.31938	0.0195208	0.0846959
10412741	NM_139227	Atxn7	ataxin 7	431.979	327.466	74.7931	0.682162	1.31916	0.136573	0.184622
10569985	NM_145591	BC003267	cDNA sequence BC003267	137.51	104.294	18.2764	10.367	1.31848	0.0814342	0.14867
[truncated: 15,297 more rows]
